# Supplementary material for: Comparison of Two Zinc Hydride Precatalysts for Selective Dehydrogenative Borylation of Terminal Alkynes: A Detailed Mechanistic Study
Source: PubMed Central journal article supplement — ACS Omega. 2023 Jan 10;8(3):3452–60. doi: 10.1021/acsomega.2c07381 (PMC9878541; doi:10.1021/acsomega.2c07381), 2023-01-10
Supplement: ao2c07381_si_001.pdf [file ao2c07381_si_001.pdf]

# Supporting Information

## Comparison of Two Zinc Hydride Precatalysts for Selective Dehydrogenative Borylation of Terminal Alkynes: A Detailed Mechanistic Study

Rajata Kumar Sahoo, Arukela Ganesh Patro, Nabin Sarkar, and Sharanappa Nembenna\*

*School of Chemical Sciences, National Institute of Science Education and Research (NISER), Homi*

*Bhabha National Institute (HBNI), Bhubaneswar, 752 050, India*

### Contents

- Optimization of Zinc Catalyzed Dehydroborylation of Phenylacetylene.....S2
- Synthesis, Analytical Data, and NMR spectra ( $^1\text{H}$ ,  $^{13}\text{C}\{^1\text{H}\}$ ,  $^{11}\text{B}$  NMR) of Stoichiometric Experiments .....S3–S38
- $^1\text{H}$ ,  $^{13}\text{C}\{^1\text{H}\}$  NMR spectra of **[L<sup>2</sup>ZnI]<sub>2</sub>**, and **III**.....S13–S15
- $^1\text{H}$ ,  $^{13}\text{C}\{^1\text{H}\}$  and  $^{11}\text{B}$  NMR Spectra of Dehydrogenative Borylation of Alkynes.....S39–S84
- $^1\text{H}$ ,  $^{13}\text{C}\{^1\text{H}\}$  and  $^{11}\text{B}$  NMR Spectra of Intermolecular Chemoselective Reaction.....S85–S89
- X-ray Crystallographic Data of **II** and **IV**.....S90–S92
- References.....S93

**Table S1:** Optimization of Zinc Catalyzed Dehydroborylation of Phenylacetylene.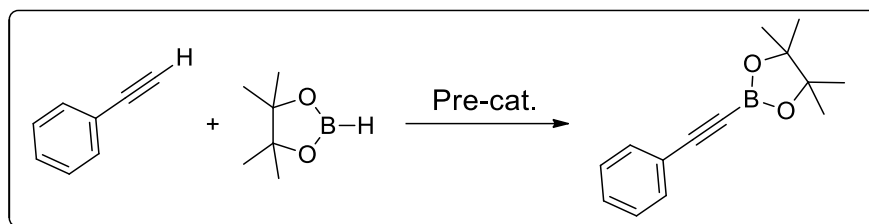

| Entry    | precatalyst    | mol %      | HBpin (eq.) | Solvent     | Temp (° C) | Time (h) | Conv. (%) |
|----------|----------------|------------|-------------|-------------|------------|----------|-----------|
| 1        | ---            | ---        | 1.05        | neat        | rt         | 6        | 0         |
| 2        | I              | 10         | 1.05        | neat        | 60         | 6        | 99        |
| 3        | I              | 5          | 1.05        | neat        | rt         | 6        | 99        |
| 4        | I              | 3          | 1.05        | neat        | rt         | 6        | 99        |
| <b>5</b> | <b>I</b>       | <b>1.5</b> | <b>1.05</b> | <b>neat</b> | <b>rt</b>  | <b>6</b> | <b>99</b> |
| 6        | I              | 1.5        | 1.05        | neat        | rt         | 1        | 99        |
| 7        | I              | 1          | 1.05        | neat        | rt         | 1        | 98        |
| 8        | I              | 0.5        | 1.05        | neat        | rt         | 1        | 75        |
| 9        | I              | 1.5        | 1.05        | benzene     | rt         | 6        | 99        |
| 10       | I              | 1.5        | 1.05        | toluene     | rt         | 6        | 99        |
| 11       | I              | 1.5        | 1.05        | THF         | rt         | 6        | 99        |
| 12       | <b>III</b>     | 1.5        | 1.05        | neat        | rt         | 6        | 97        |
| 13       | <b>Cat. II</b> | 1.5        | 1.05        | neat        | rt         | 6        | 99        |
| 14       | <b>Cat. IV</b> | 1.5        | 1.05        | neat        | rt         | 6        | 97        |

Synthesis, Analytical Data, and NMR spectra ( $^1\text{H}$ ,  $^{13}\text{C}\{^1\text{H}\}$ ,  $^{11}\text{B}$  NMR) of Stoichiometric Experiments.

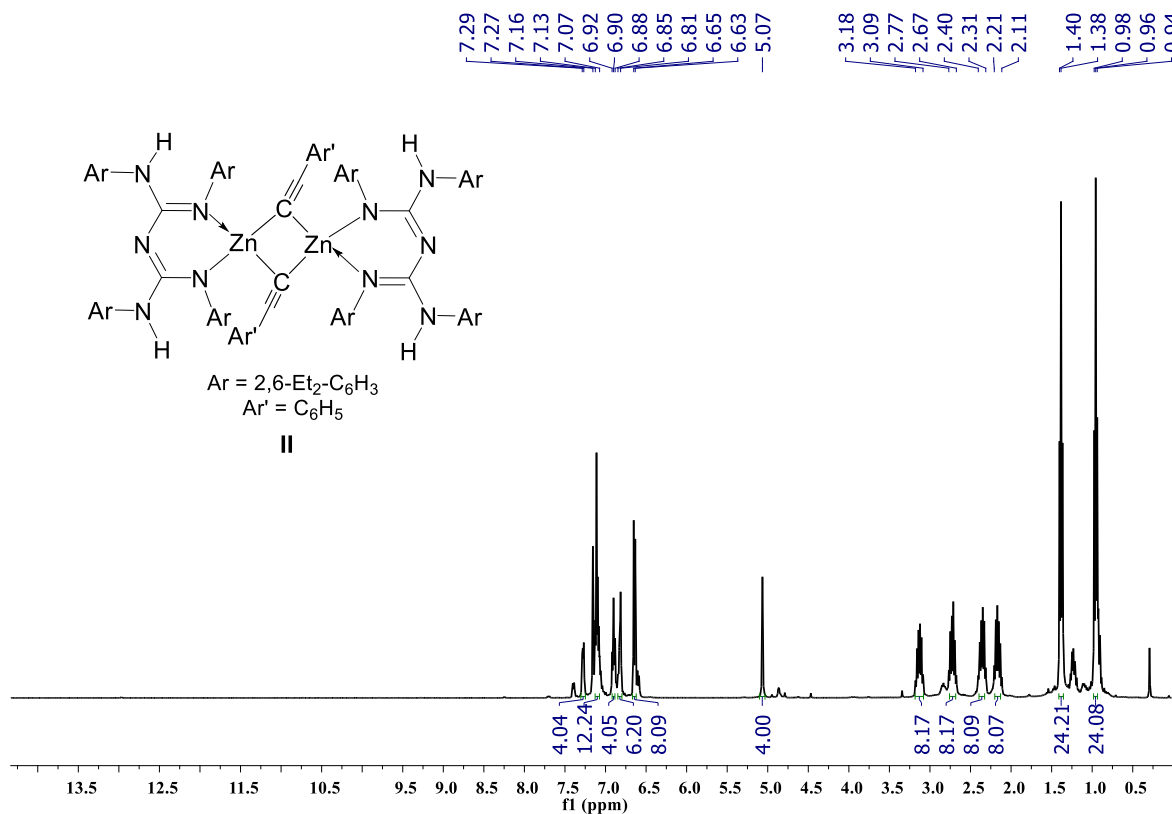

Figure S1:  $^1\text{H}$  NMR (400 MHz, 25 °C,  $\text{C}_6\text{D}_6$ ) spectrum of compound II.

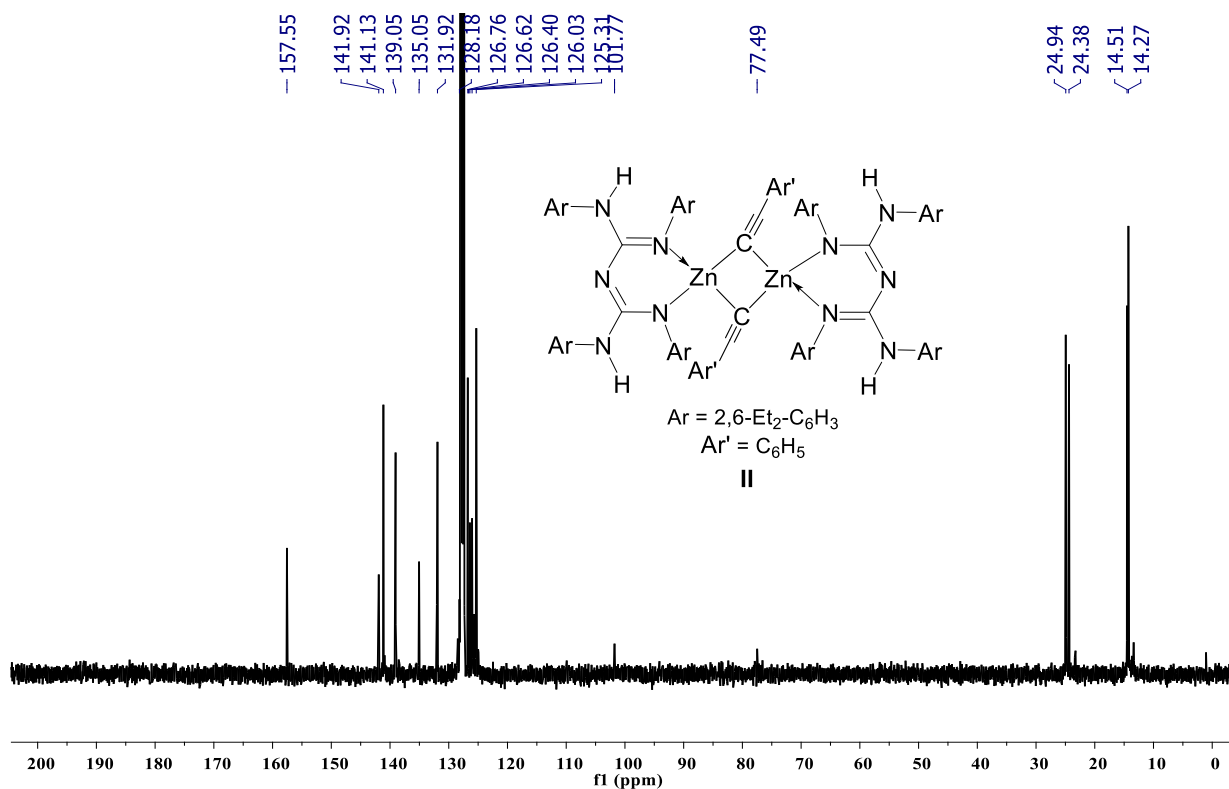

Figure S2:  $^{13}\text{C}\{^1\text{H}\}$  NMR (100 MHz, 25 °C,  $\text{C}_6\text{D}_6$ ) spectrum of compound II.

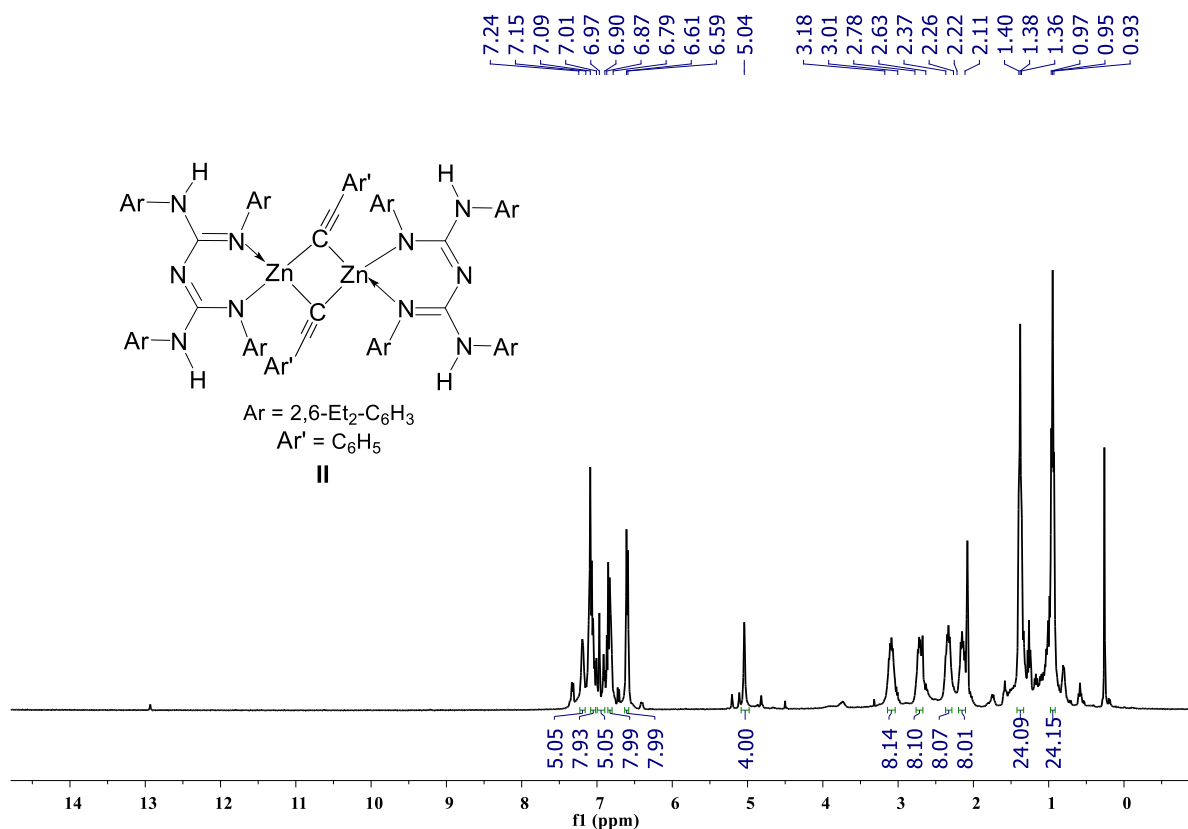

**Figure S3:**  $^1\text{H NMR}$  (400 MHz, 25 °C,  $d_8$ -toluene) spectrum of compound II.

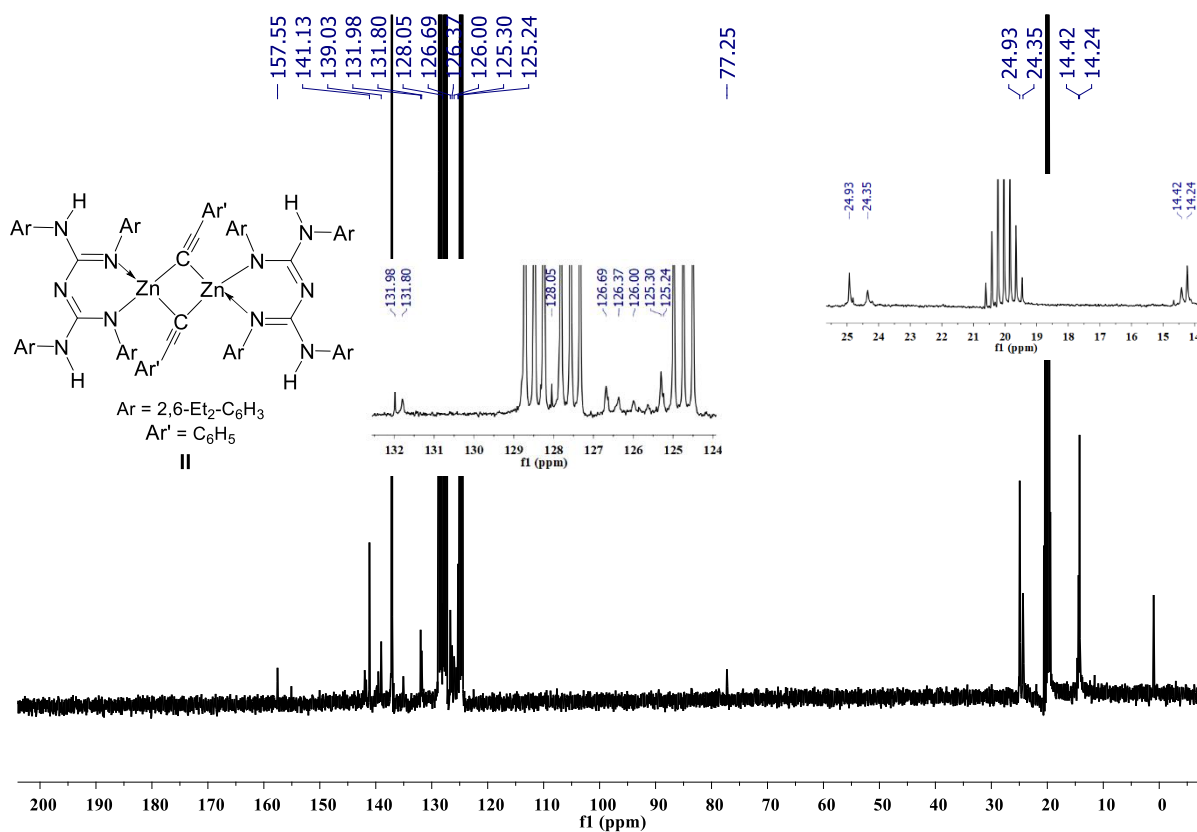

**Figure S4:**  $^{13}\text{C}\{^1\text{H}\}$  NMR (100 MHz, 25 °C,  $d_8$ -toluene) spectrum of compound II.

**The reaction between zinc alkynyl **II** and HBpin {NMR-Scale}: The addition of HBpin (4.06  $\mu$ L, 0.028 mmol) to a J. Young valve NMR tube containing a solution of compound **II** (0.014 mmol) in  $d_8$ -toluene at room temperature after 30 minutes resulted in the formation of compounds **I** and **2a** with a 30% yield was observed by multinuclear NMR spectroscopy.  $^1\text{H}$  and  $^{11}\text{B}$  NMR spectroscopy revealed that the reaction had reached an equilibrium, best evidenced by the integration of resonance for Bpin moieties of **2a** and HBpin. Extended heating up to 24 h at 80  $^\circ\text{C}$  showed no change in the relative ratio of **2a** and **II**, suggesting that the equilibrium position had already been reached before heating. NMR Yield: (30%).**

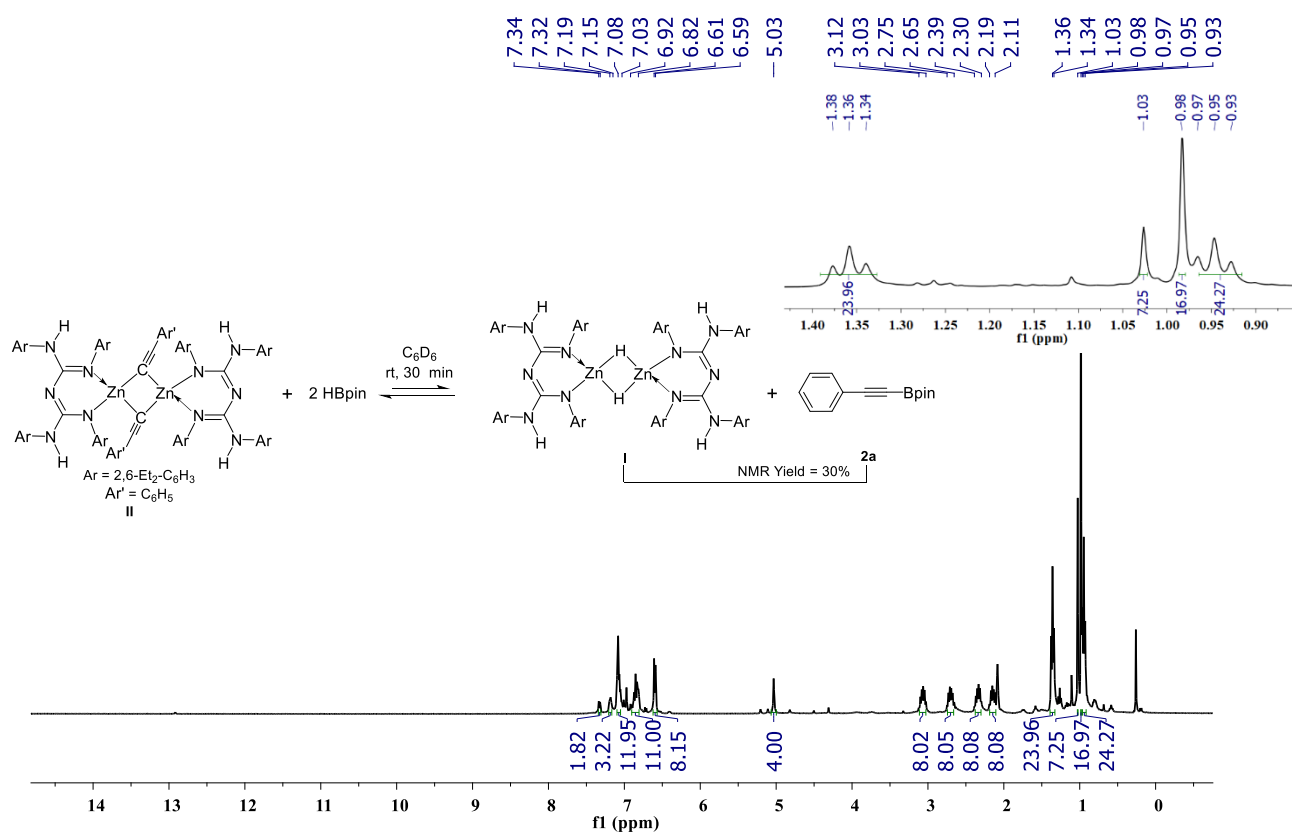

**Figure S5:**  $^1\text{H}$  NMR (400 MHz, 25  $^\circ\text{C}$ ,  $d_8$ -toluene) spectrum of compounds  $[\text{L}^1\text{ZnH}]_2$  & **2a**.

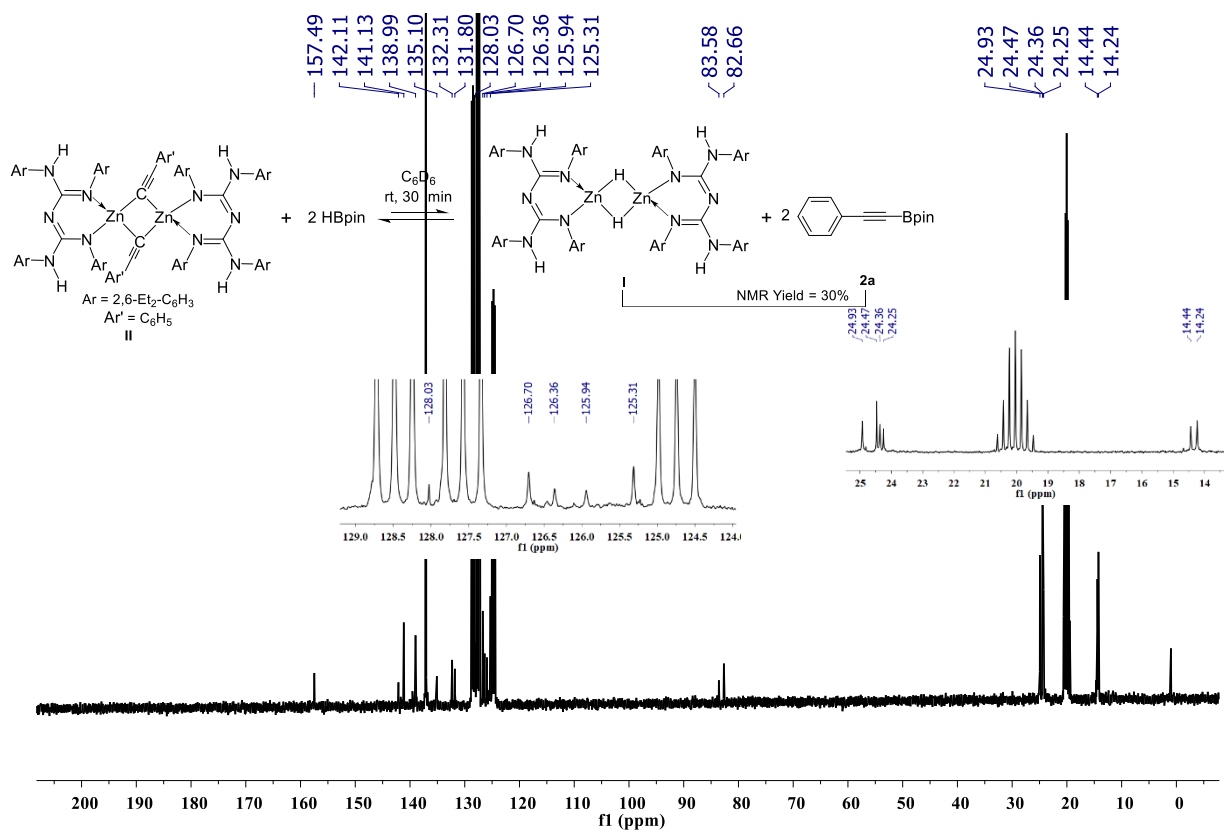

**Figure S6:**  $^{13}\text{C}\{^1\text{H}\}$  NMR (100 MHz, 25 °C,  $d_8$ -toluene) spectrum of compounds  $[\text{L}^1\text{ZnH}]_2$  & **2a**.

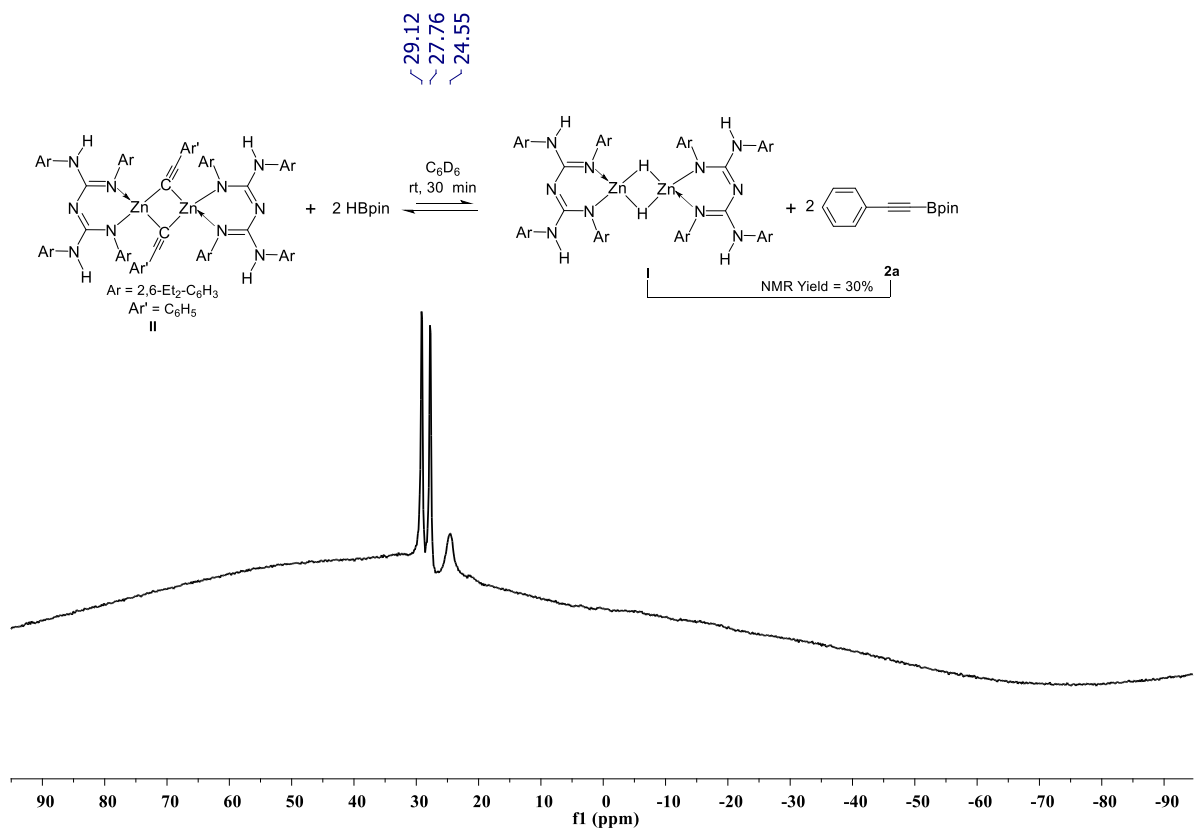

**Figure S7:**  $^{11}\text{B}$  NMR (128 MHz, 25 °C,  $d_8$ -toluene) spectrum of compounds  $[\text{L}^1\text{ZnH}]_2$  & **2a**. A doublet peak at  $\delta$  27.76 – 29.12 ppm arises from free HBpin.

**The reaction between zinc hydride I and 2a {NMR-Scale}: The addition of 2a (6.5 mg, 0.028 mmol) to a solution of complex I (0.020 g, 25 °C, 0.014 mmol) in *d*<sub>8</sub>-toluene in a J. Young valve NMR tube after 1 h at 60 °C resulted in the formation of compound II, and HBpin with 70% yield was observed by <sup>1</sup>H and <sup>11</sup>B NMR spectroscopy. After 24 h at room temperature, no change was observed in the reaction mixture. <sup>1</sup>H and <sup>11</sup>B NMR spectroscopy revealed that the reaction reached an equilibrium, best evidenced by the integration of resonance for Bpin moieties of 2a and compound II. Extended heating up to 24 h at 80 °C showed no change in the relative ratio of 2a and II, suggesting that the equilibrium position had already been reached before heating. NMR Yield: (70%).**

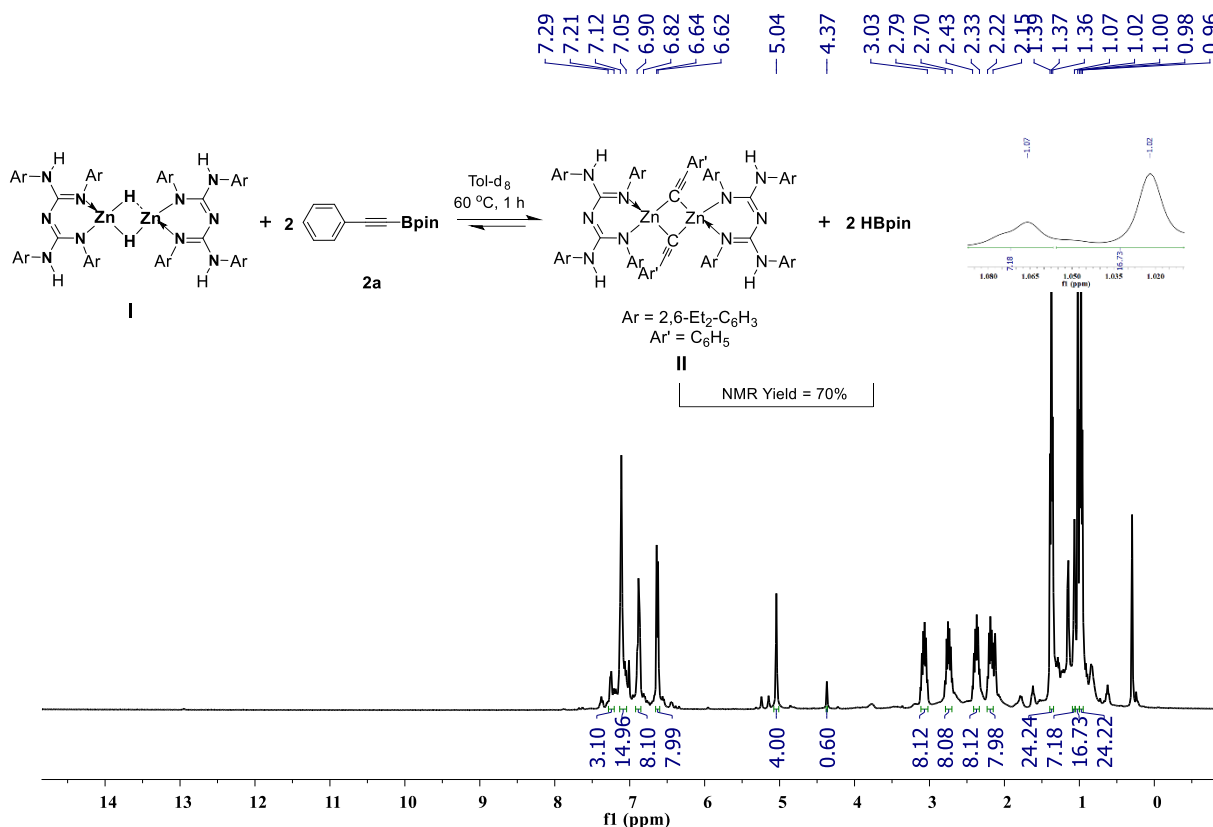

**Figure S8:** <sup>1</sup>H NMR (400 MHz, 25 °C, *d*<sub>8</sub>-toluene) spectrum of compounds **II** & 2HBpin.

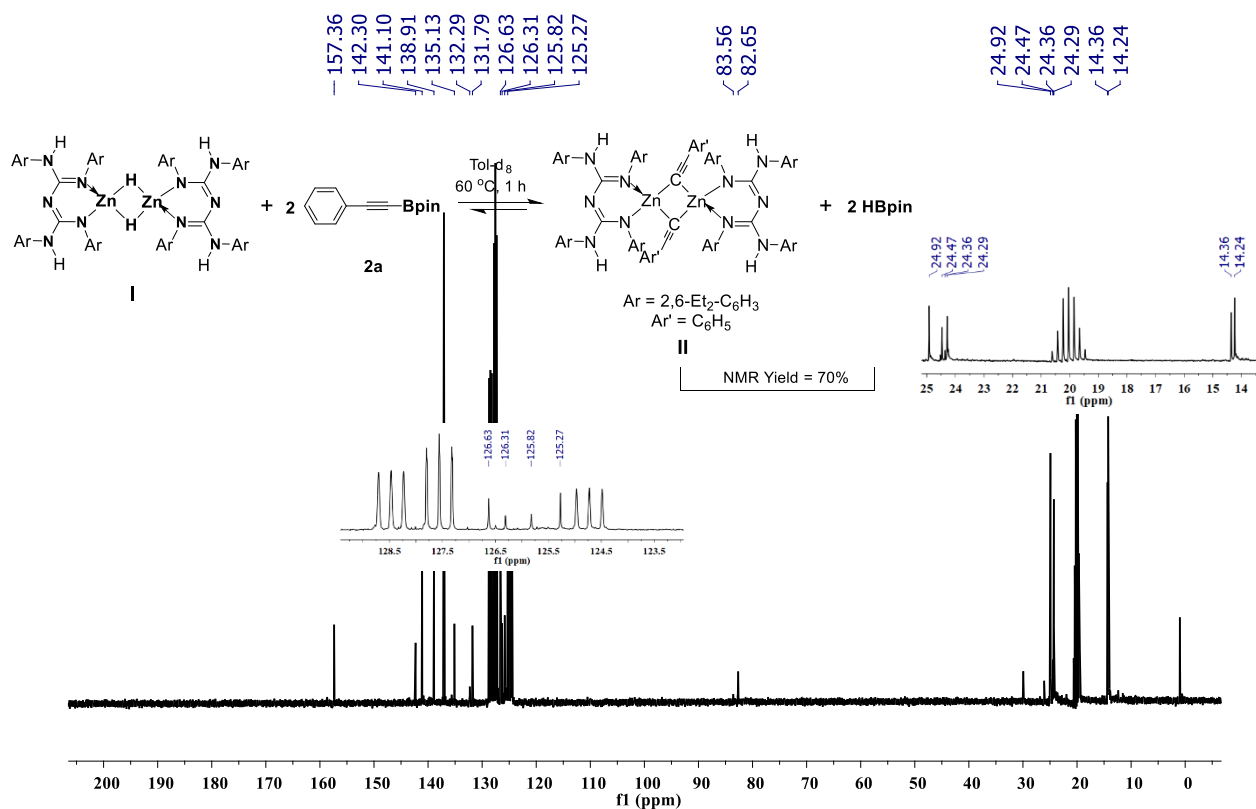

**Figure S9:**  $^{13}\text{C}\{^1\text{H}\}$  NMR (100 MHz, 25 °C,  $d_8$ -toluene) spectrum of compounds **II** & 2HBpin.

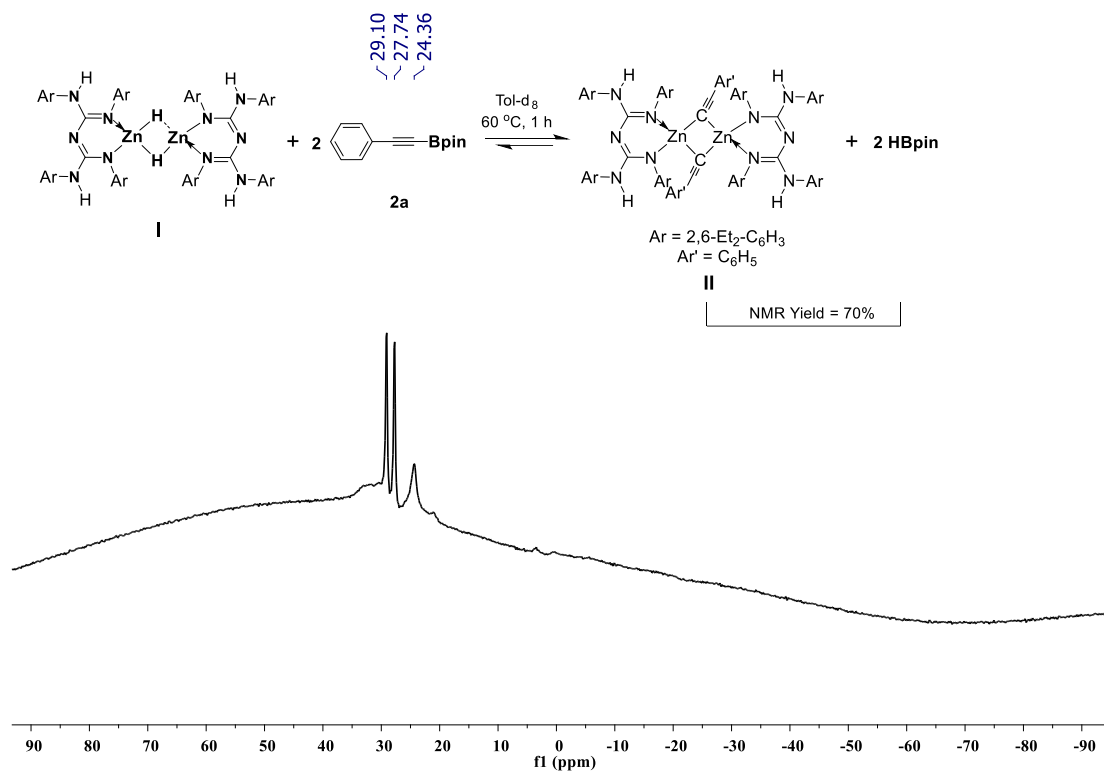

**Figure S10:**  $^{11}\text{B}$  NMR (128 MHz, 25 °C,  $d_8$ -toluene) spectrum of compounds **II** & 2HBpin. A doublet peak at  $\delta$  27.74 – 29.10 ppm arises from free HBpin.



**Synthesis of compound II and 2a {NMR-Scale}: The addition of phenylacetylene (3.07  $\mu$ L, 0.028 mmol) to a J. Young valve NMR tube containing a solution of compound I and 2a (30%) in  $d_8$ -toluene at room temperature after 15 minutes resulted in the complete formation of compound II and 2a was observed by  $^1\text{H}$  and  $^{11}\text{B}$  NMR spectroscopy. The above study indicates that once 30% compound 2a and I was formed, it immediately reacted with one additional equivalent of phenylacetylene to form a quantitative amount of product 2a and compound II. It stops the equilibrium reaction between compounds II and 2a. NMR Yield: (>99%).  $^1\text{H}$  NMR (400 MHz,  $d_8$ -toluene)  $\delta$  7.34 – 7.32 (m, 4H), 7.19 – 7.18 (m, 3H), 7.10 – 7.03 (m, 14H), 6.92 – 6.81 (m, 15H), 6.61 – 6.59 (d,  $^3J_{\text{HH}} = 9.6$  Hz, 8H), 5.05 (s, 4H), 3.14 – 3.05 (m, 8H), 2.76 – 2.65 (m, 8H), 2.39 – 2.29 (m, 8H), 2.19 – 2.11 (m, 8H), 1.38 (t,  $^3J_{\text{HH}} = 7.4$  Hz, 24H), 1.03 (s, 24H), 0.95 (t,  $^3J_{\text{HH}} = 7.6$  Hz, 24H).  $^{13}\text{C}\{^1\text{H}\}$  NMR (101 MHz,  $d_8$ -toluene)  $\delta$  157.5, 141.1, 139.0, 135.0, 132.3, 131.9, 131.8, 128.7, 128.3, 128.0, 128.0, 126.6, 126.4, 126.3, 125.9, 125.3, 83.5, 77.2, 24.9, 24.3, 24.2, 14.4, 14.2.  $^{11}\text{B}$  NMR (128 MHz,  $d_8$ -toluene)  $\delta$  24.71.**

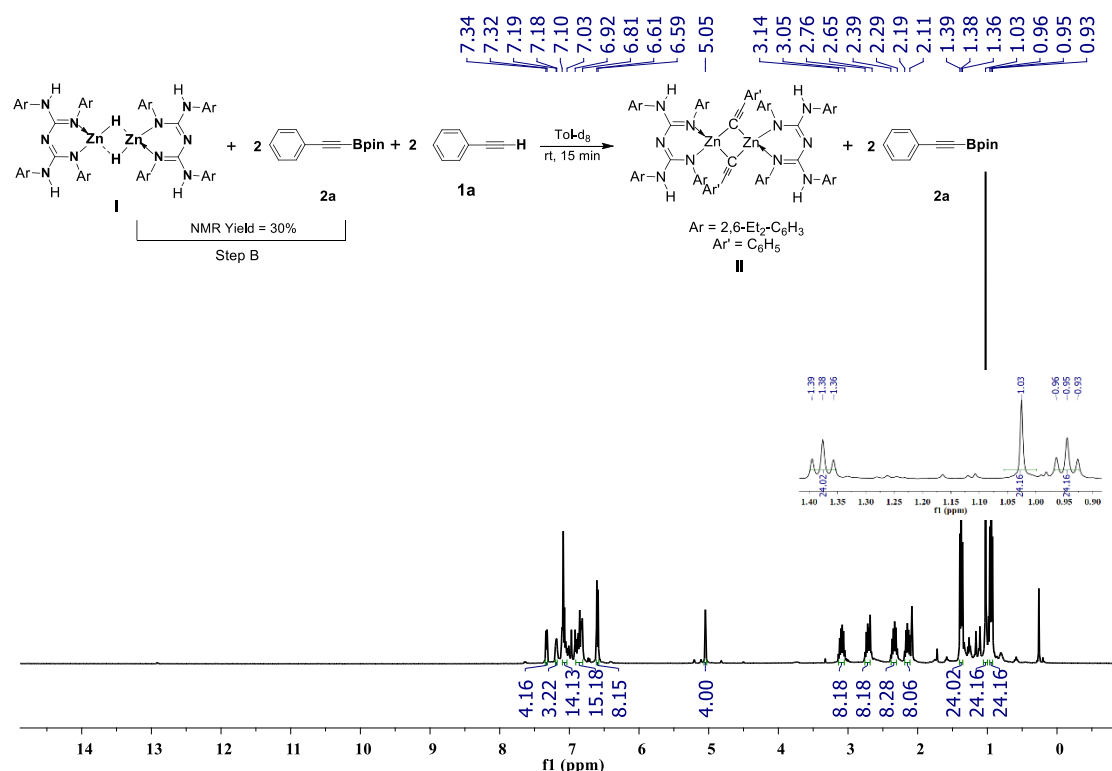

**Figure S11:**  $^1\text{H}$  NMR (400 MHz, 25 °C,  $d_8$ -toluene) spectrum of compounds II & 2a.

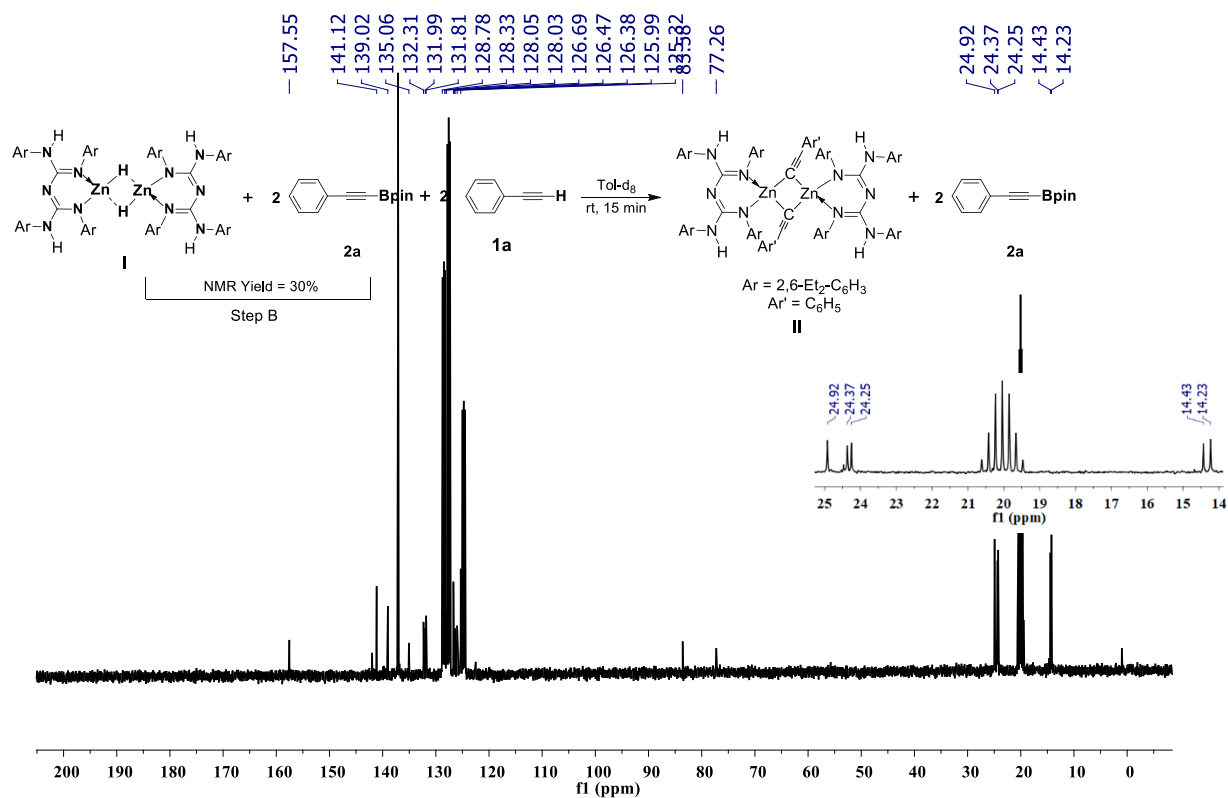

**Figure S12:** <sup>13</sup>C{<sup>1</sup>H} NMR (100 MHz, 25 °C, d<sub>8</sub>-toluene) spectrum of compounds II & 2a.

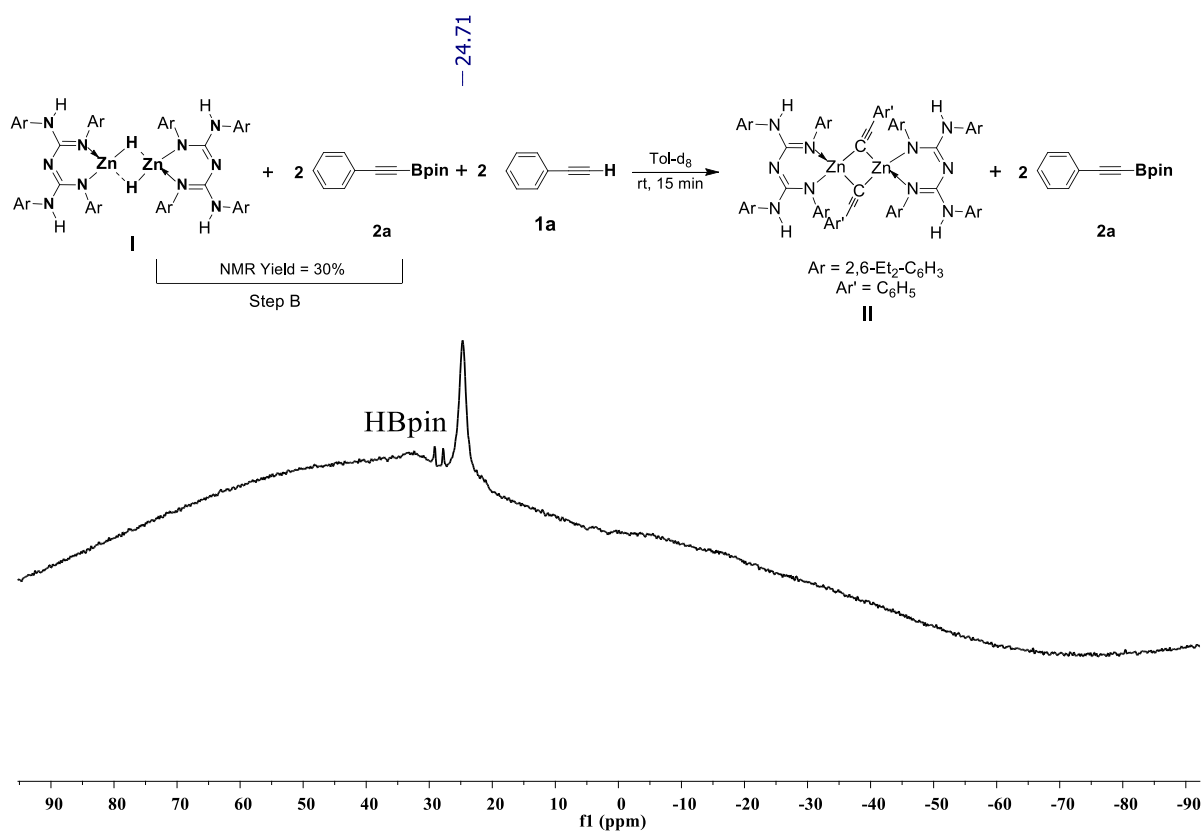

**Figure S13:** <sup>11</sup>B NMR (128 MHz, 25 °C, d<sub>8</sub>-toluene) spectrum of compounds II & 2a.

**The reaction between zinc hydride I, phenylacetylene, and compound 2a {NMR-Scale}:**

In a J. Young valve NMR tube (0.020 g, 25 °C, 0.014 mmol) complex **I**, (6.5 mg, 0.028 mmol) of **2a**, and (3.07  $\mu$ L, 0.028 mmol) of phenylacetylene were added successively in  $d_8$ -toluene. Reaction progress was monitored by  $^1\text{H}$  NMR analyses, which confirmed that at room temperature after 20 minutes, the complete formation of compound **II** with the liberation of  $\text{H}_2$  gas and unreacted compound **2a** was observed by  $^1\text{H}$  and  $^{11}\text{B}$  NMR spectroscopy. The above study indicates the exclusive formation of compound **II** with a quantitative yield, and compound **2a** was untouched. It again revealed that the presence of phenylacetylene stopped the equilibrium reaction between compounds **I** and **2a**. NMR Yield: (>99%).  $^1\text{H}$  NMR (400 MHz,  $d_8$ -toluene)  $\delta$  7.34 – 7.32 (m, 4H), 7.22 – 7.15 (m, 3H), 7.10 – 7.02 (m, 14H), 6.92 – 6.81 (m, 15H), 6.61 – 6.59 (d,  $^3J_{\text{HH}} = 9.5$  Hz, 8H), 5.05 (s, 4H), 3.14 – 3.05 (m, 8H), 2.75 – 2.66 (m, 8H), 2.39 – 2.29 (m, 8H), 2.19 – 2.11 (m, 8H), 1.38 (t,  $^3J_{\text{HH}} = 7.5$  Hz, 24H), 1.03 (s, 24H), 0.95 (t,  $^3J_{\text{HH}} = 7.5$  Hz, 24H).  $^{13}\text{C}\{^1\text{H}\}$  NMR (101 MHz,  $d_8$ -toluene)  $\delta$  157.5, 141.1, 139.0, 135.0, 132.3, 131.9, 131.8, 128.7, 128.3, 128.0, 128.0, 126.7, 126.3, 126.0, 125.3, 101.6, 83.5, 77.2, 24.9, 24.3, 24.2, 14.4, 14.2.  $^{11}\text{B}$  NMR (128 MHz,  $d_8$ -toluene)  $\delta$  24.69.

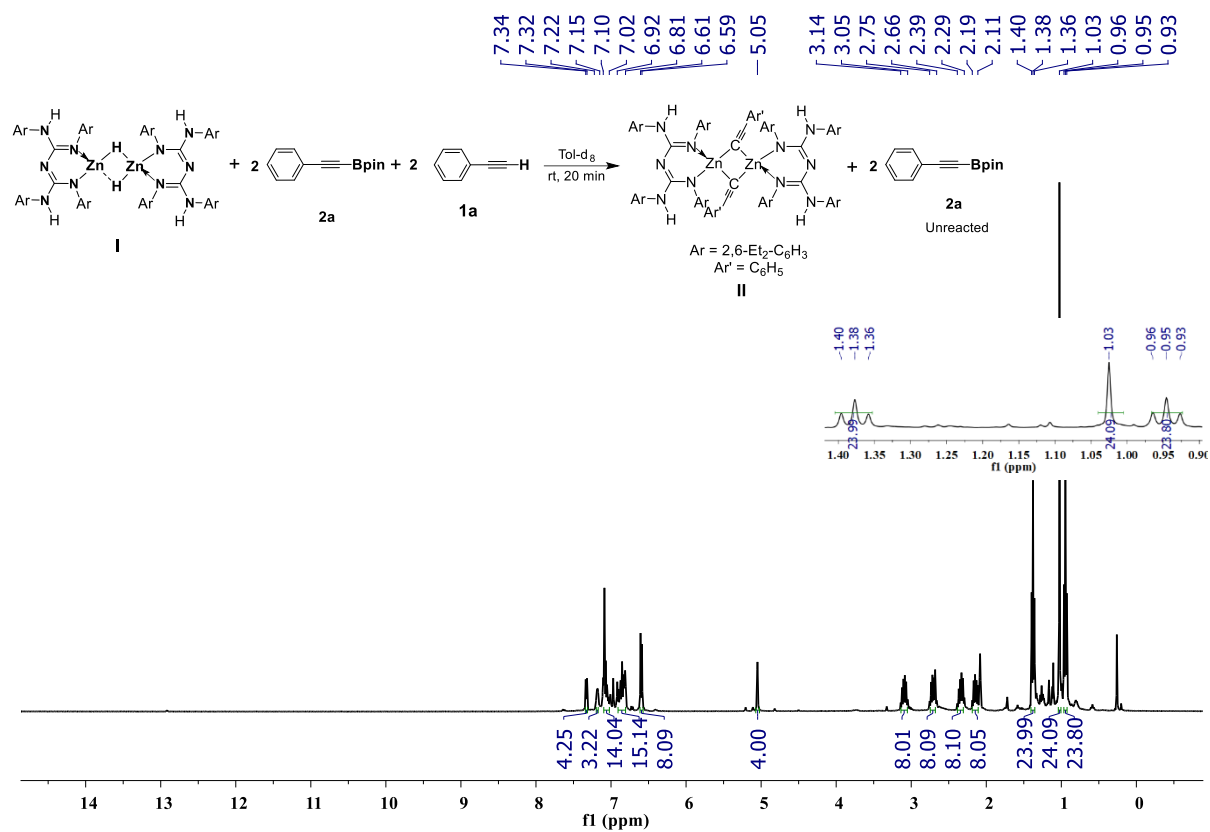

**Figure S14:** <sup>1</sup>H NMR (400 MHz, 25 °C, d<sub>8</sub>-toluene) spectrum of compounds **II** & **2a**.

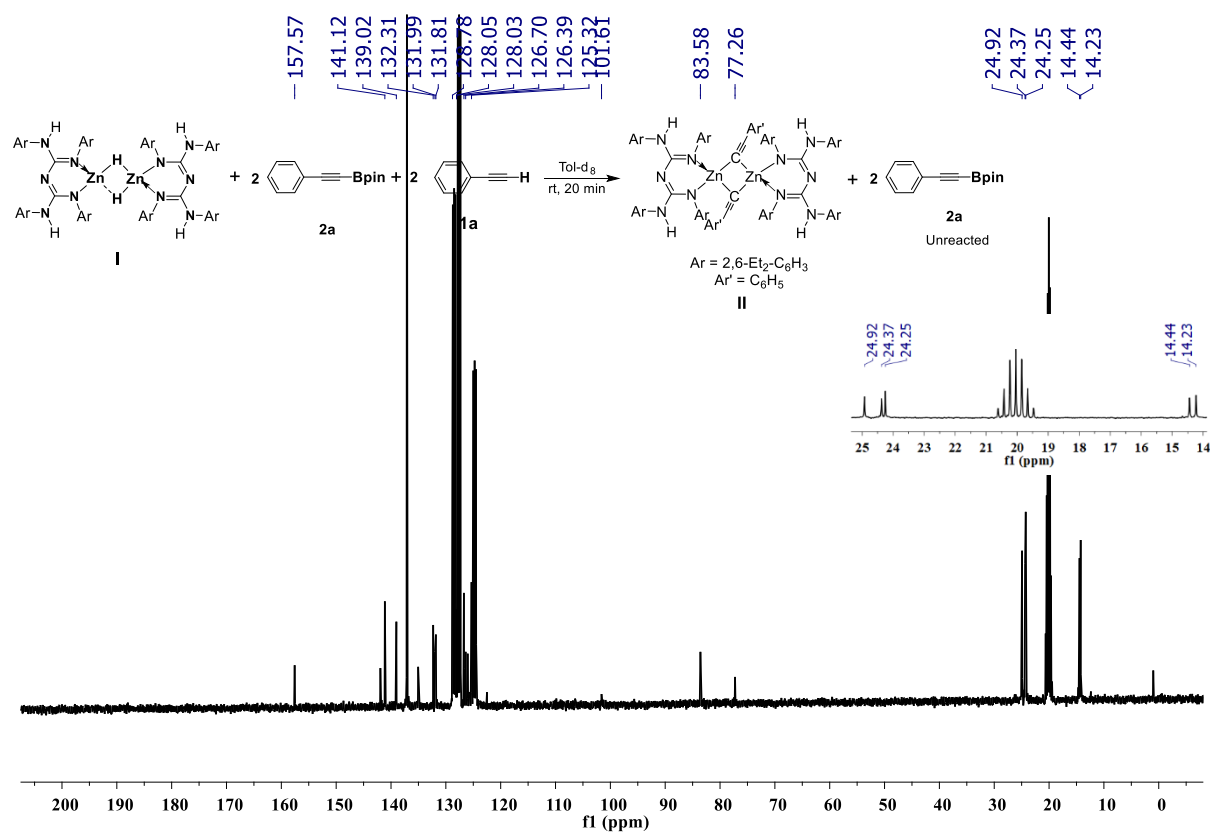

**Figure S15:** <sup>13</sup>C{<sup>1</sup>H} NMR (100 MHz, 25 °C, d<sub>8</sub>-toluene) spectrum of compounds **II** & **2a**.

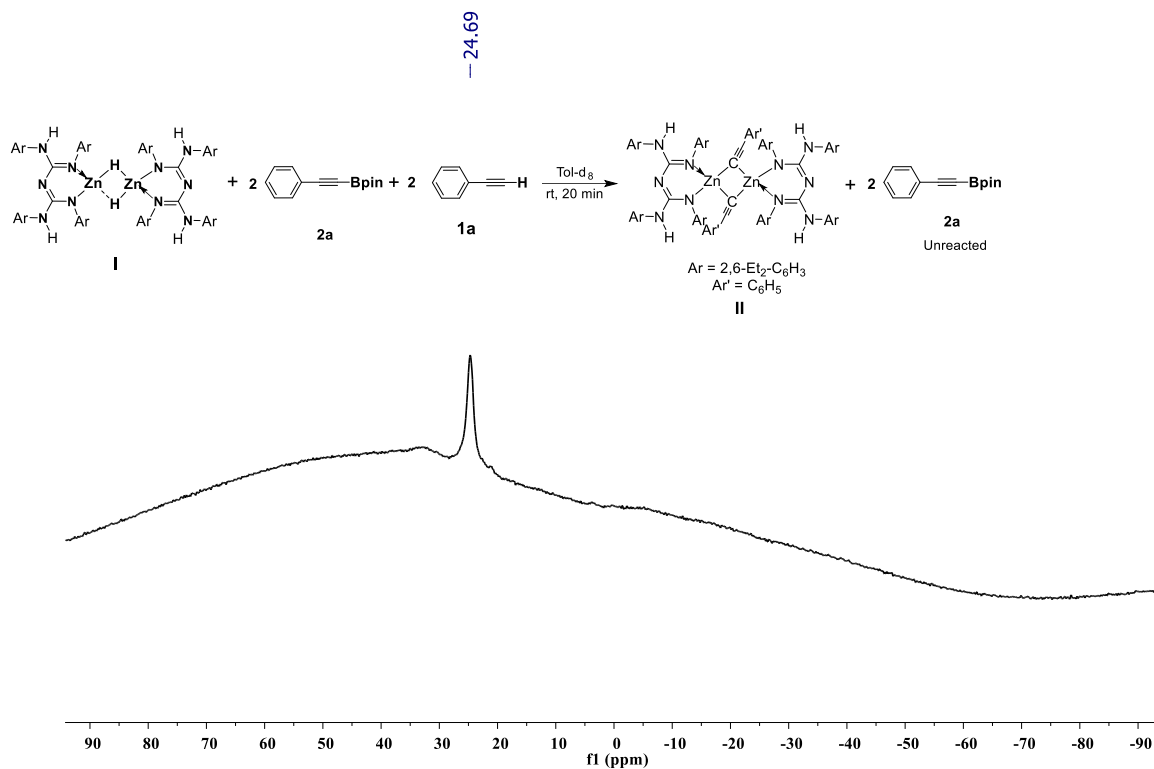

**Figure S16:** <sup>11</sup>B NMR (128 MHz, 25 °C, *d*<sub>8</sub>-toluene) spectrum of compounds **II** & **2a**.

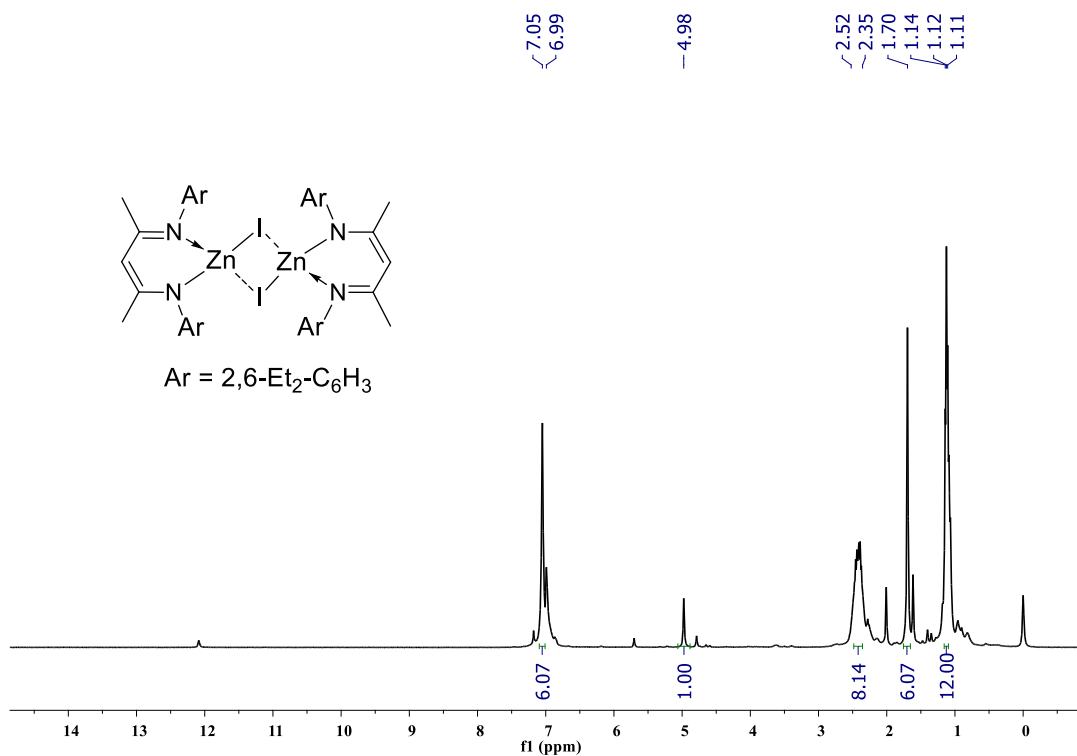

**Figure S17:** <sup>1</sup>H NMR (400 MHz, 25 °C, CDCl<sub>3</sub>) spectrum of compound [L<sup>2</sup>ZnI]<sub>2</sub>.

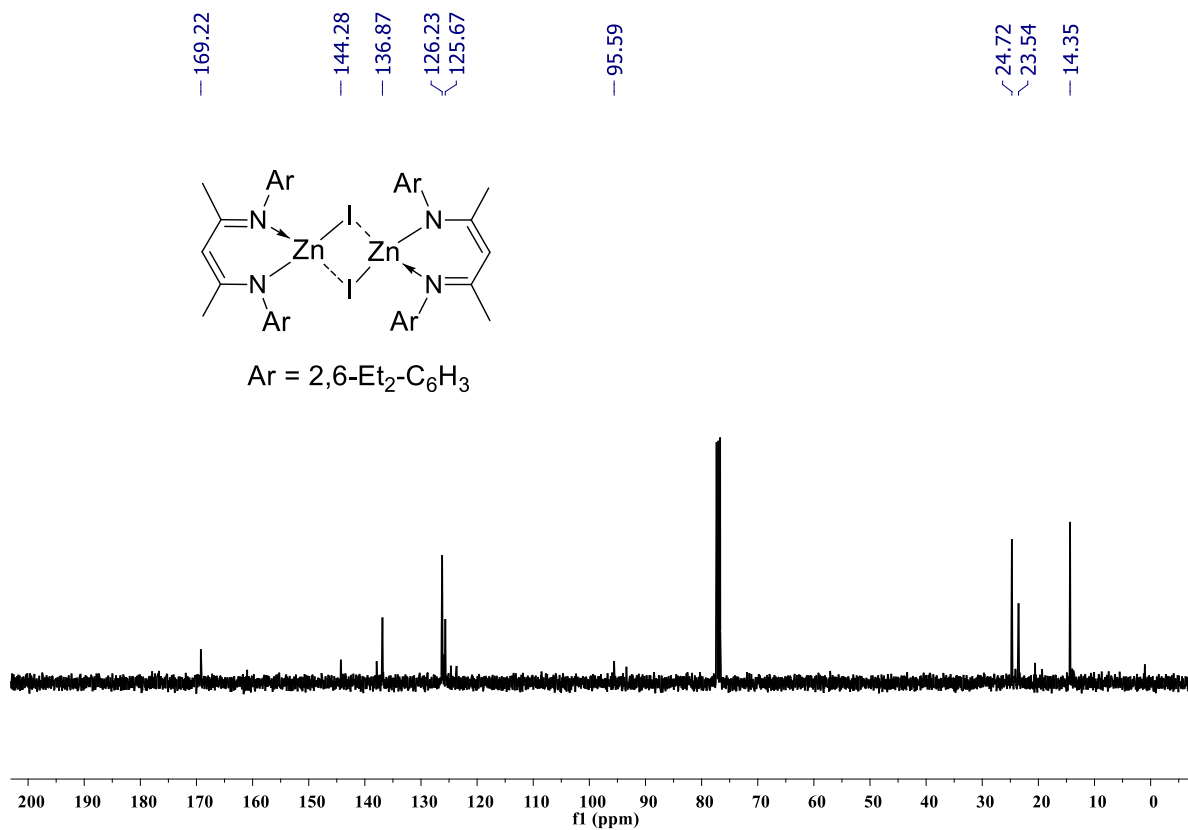

**Figure S18:**  $^{13}\text{C}\{^1\text{H}\}$  NMR (100 MHz, 25 °C,  $\text{CDCl}_3$ ) spectrum of compound **I**.

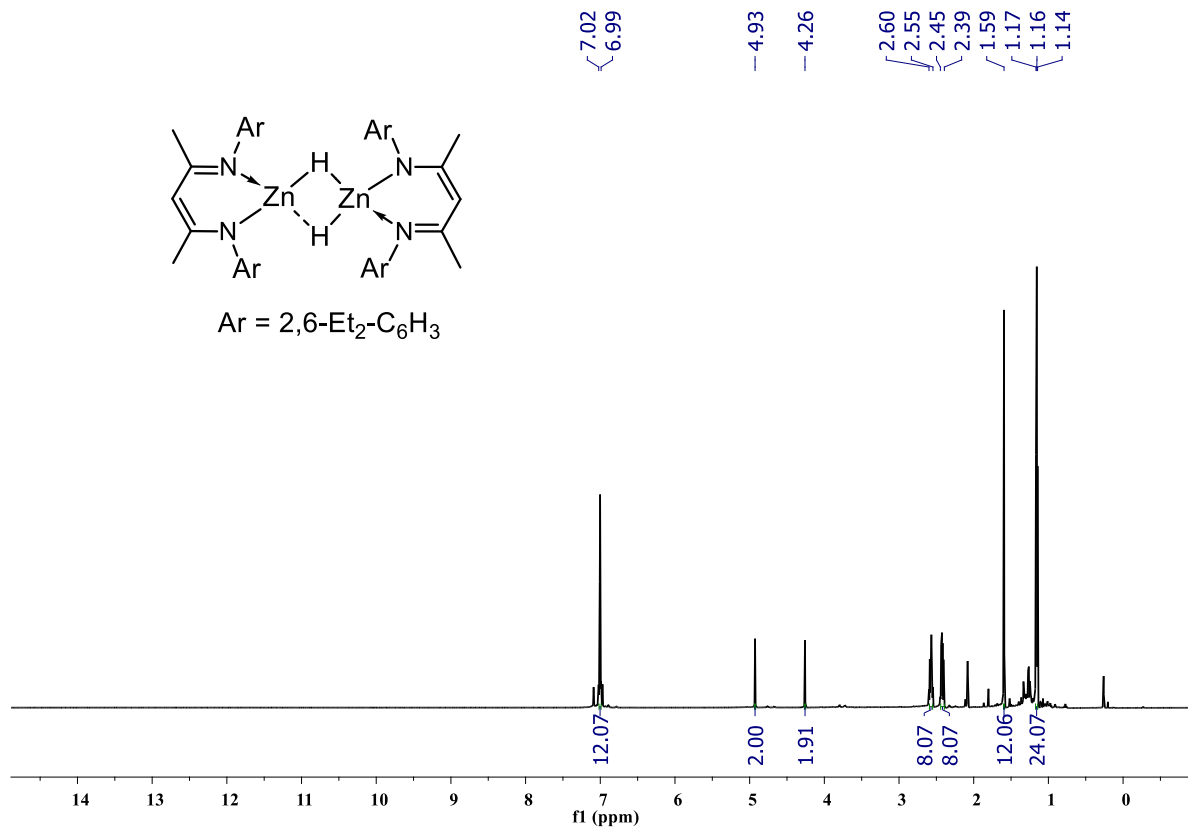

**Figure S19:**  $^1\text{H}$  NMR (700 MHz, 25 °C,  $d_8$ -toluene) spectrum of compound **III**.

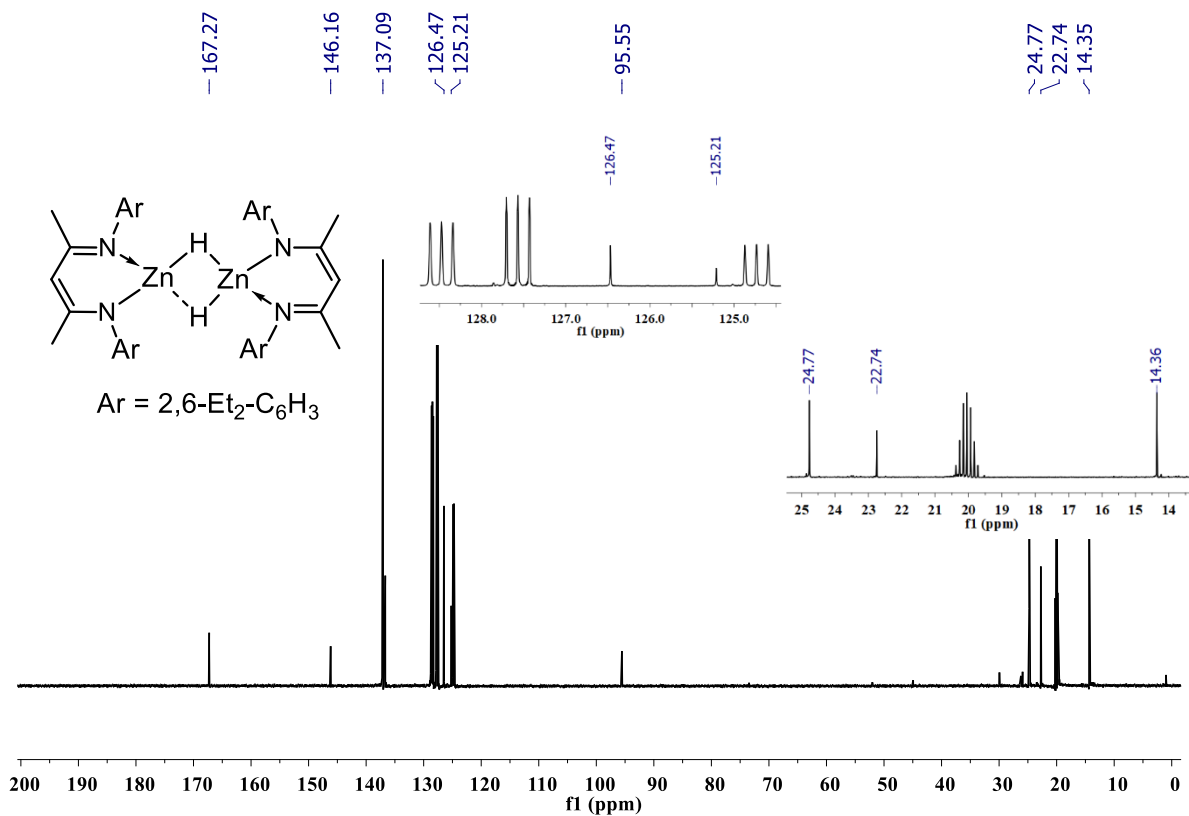

**Figure S20:** <sup>13</sup>C{<sup>1</sup>H} NMR (176 MHz, 25 °C, *d*<sub>8</sub>-toluene) spectrum of compound III.

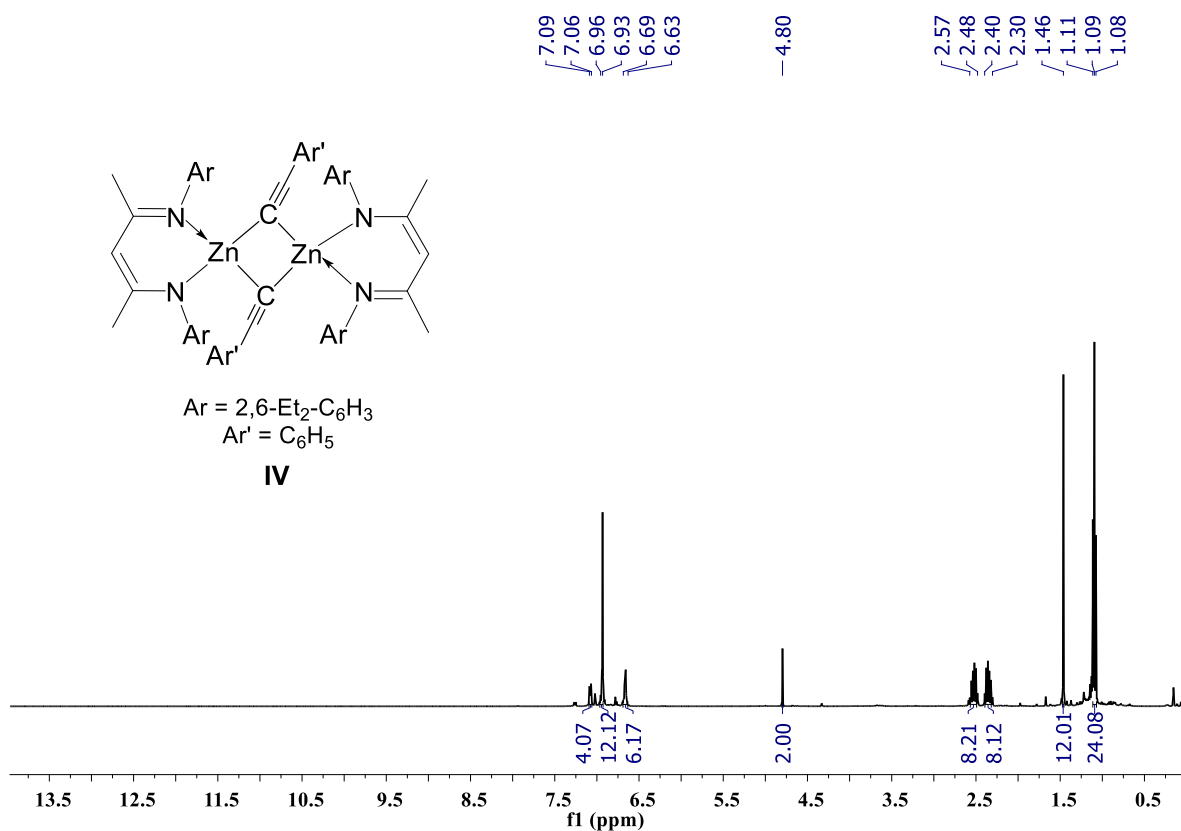

**Figure S21:** <sup>1</sup>H NMR (400 MHz, 25 °C, C<sub>6</sub>D<sub>6</sub>) spectrum of compound IV.

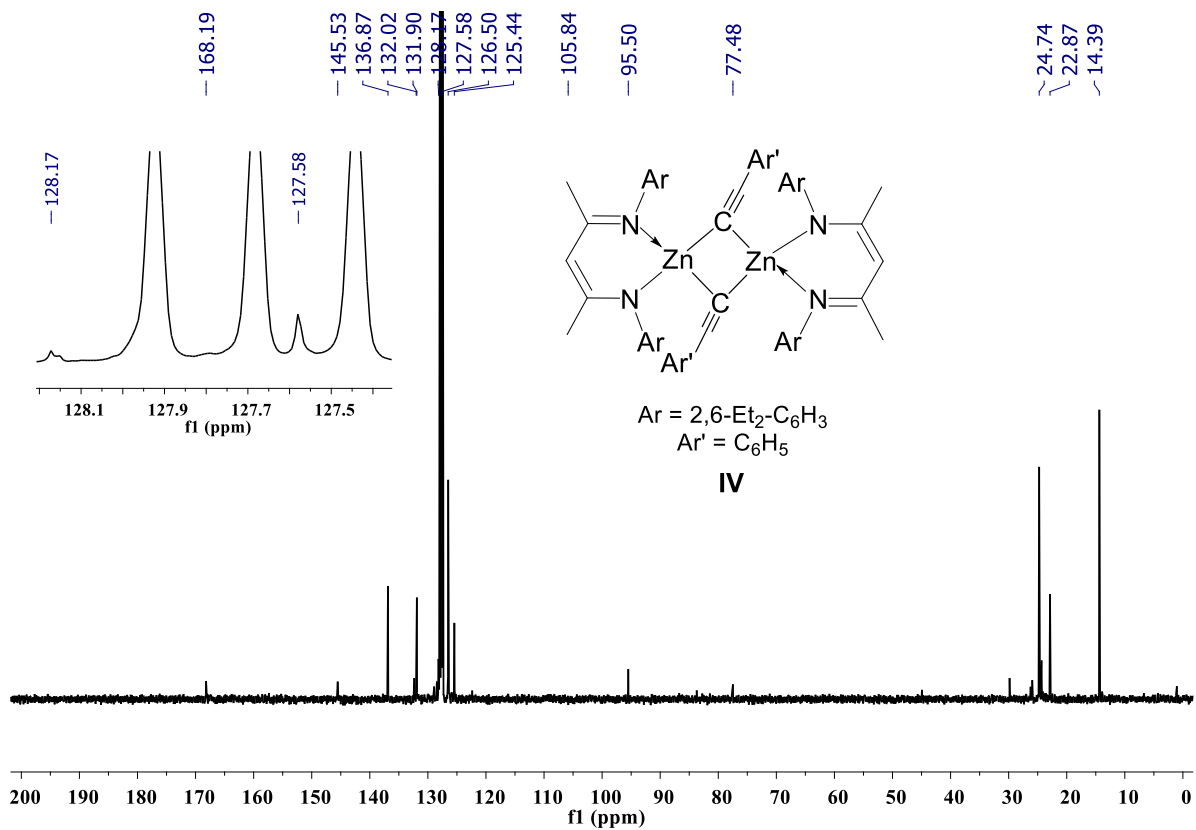

**Figure S22:**  $^{13}\text{C}\{^1\text{H}\}$  NMR (100 MHz, 25 °C,  $\text{C}_6\text{D}_6$ ) spectrum of compound IV.

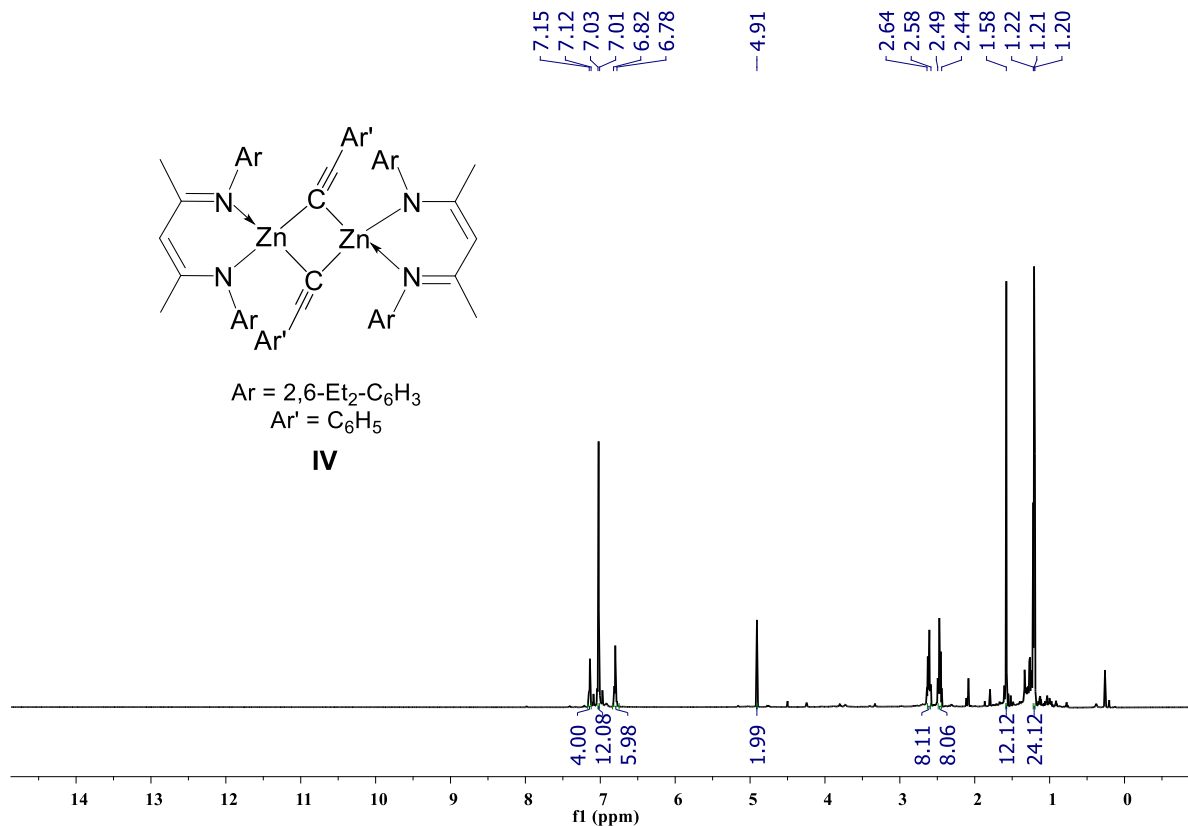

**Figure S23:**  $^1\text{H}$  NMR (700 MHz, 25 °C,  $d_8$ -toluene) spectrum of compound IV.



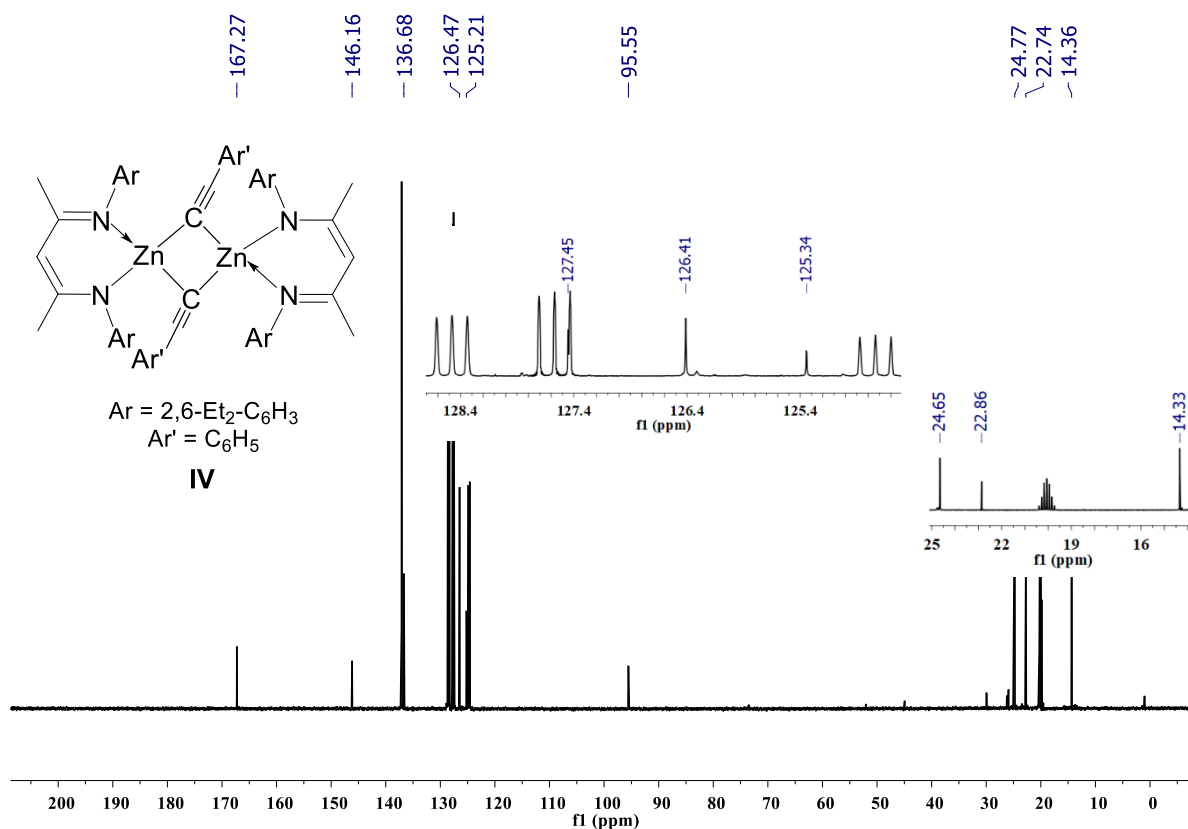

**Figure S24:** <sup>13</sup>C{<sup>1</sup>H} NMR (176 MHz, 25 °C, *d*<sub>8</sub>-toluene) spectrum of compound **IV**.

**The reaction between zinc alkynyl **IV** and HBpin {NMR-Scale}:** The addition of HBpin (6.81 μL, 0.047 mmol) to a J. Young valve NMR tube containing a solution of compound **IV** (0.023 mmol) in *d*<sub>8</sub>-toluene at room temperature after 30 min. resulted in the formation of compounds **III** and **2a**, with a 25% yield observed by multinuclear NMR spectroscopy. <sup>1</sup>H and <sup>11</sup>B NMR spectroscopy revealed that the reaction has reached an equilibrium best evident by the integration of resonance for Bpin moieties of **2a** and HBpin. Extended heating up to 24 h at 80 °C showed no change in the relative ratio of **2a** and **IV**, suggesting that the equilibrium position had already been reached before heating. NMR Yield: (25%).

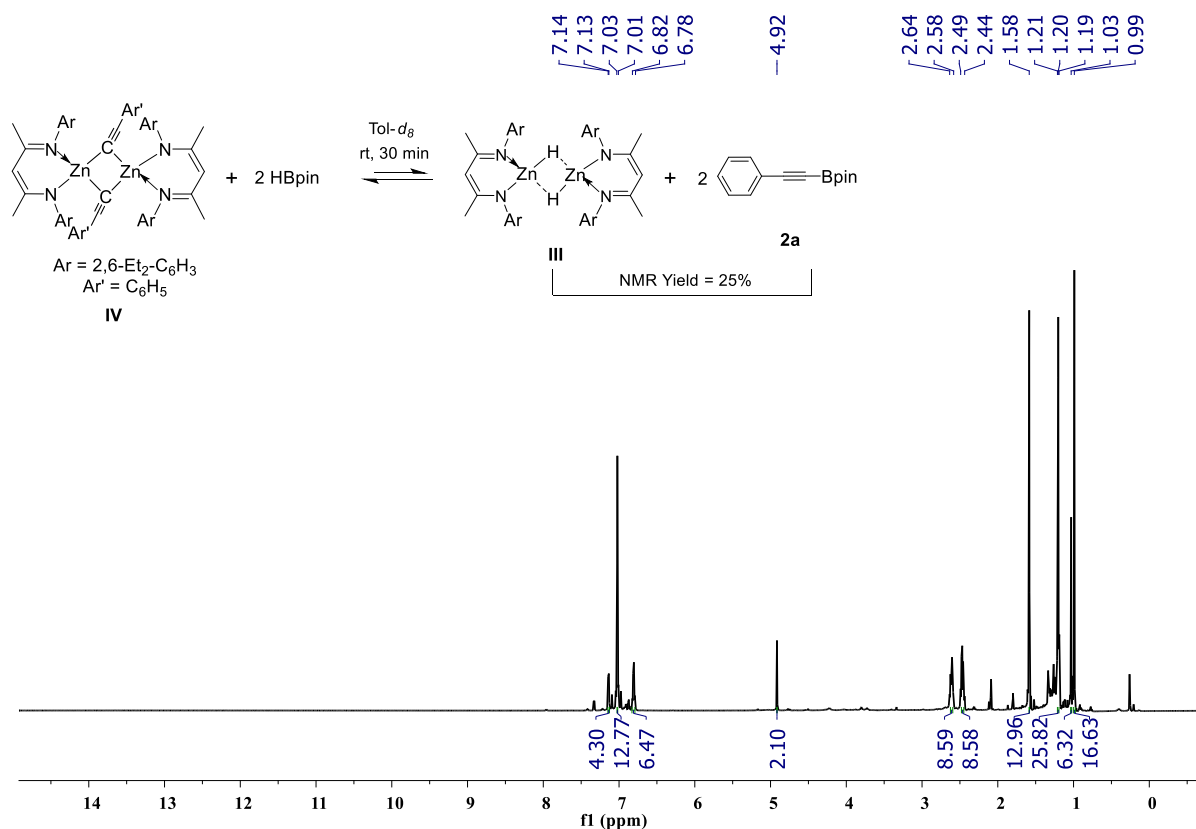

**Figure S25:** <sup>1</sup>H NMR (700 MHz, 25 °C, *d*<sub>8</sub>-toluene) spectrum of compounds [L<sup>2</sup>ZnH]<sub>2</sub> & **2a**.

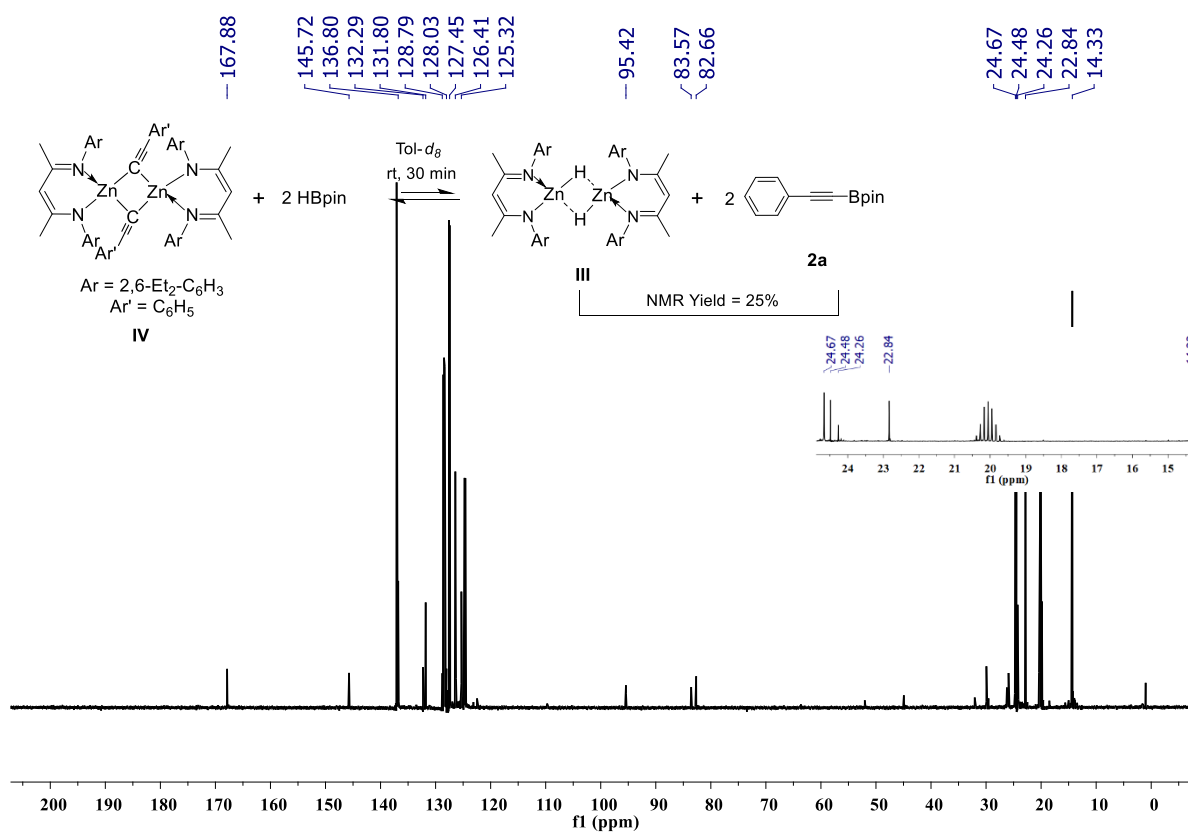

**Figure S26:** <sup>13</sup>C{<sup>1</sup>H} NMR (176 MHz, 25 °C, *d*<sub>8</sub>-toluene) spectrum of compounds [L<sup>2</sup>ZnH]<sub>2</sub> & **2a**.

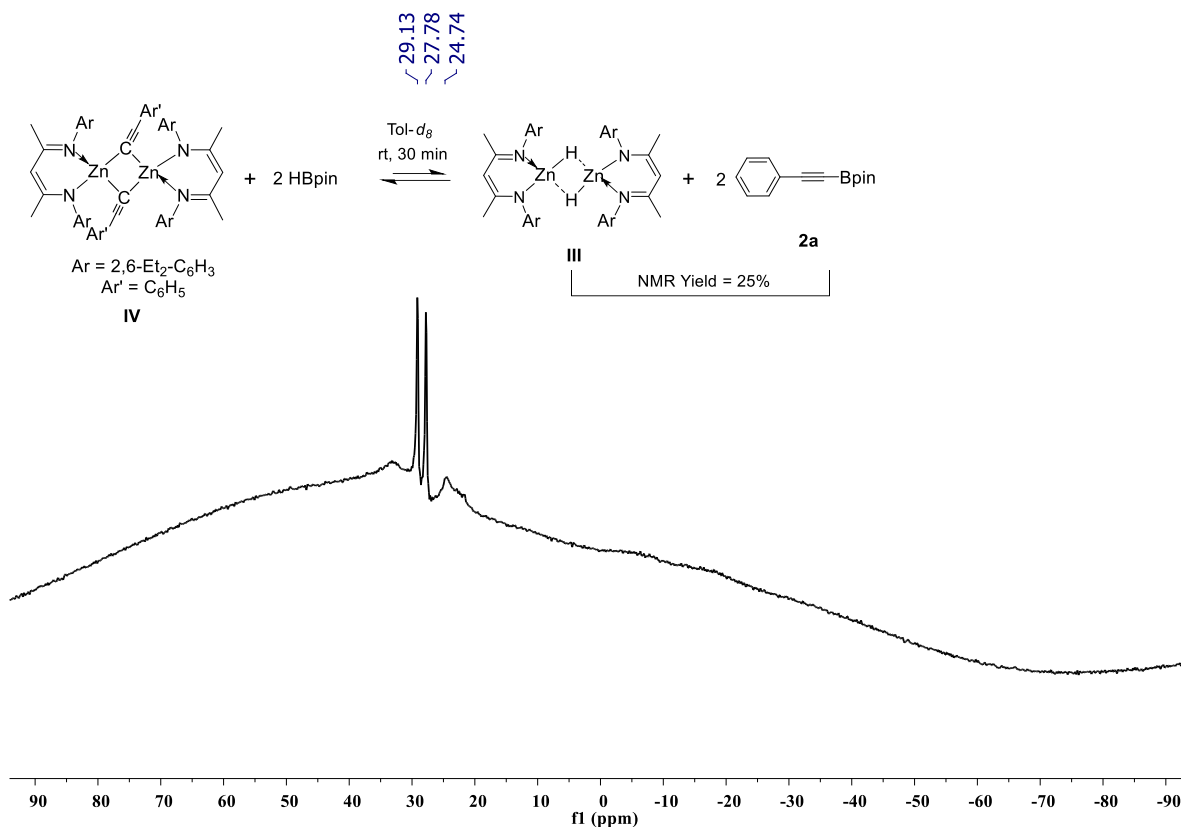

**Figure S27:**  $^{11}\text{B}$  NMR (128 MHz, 25 °C,  $d_8$ -toluene) spectrum of compounds  $[\text{L}^2\text{ZnH}]_2$  & **2a**. A doublet peak at  $\delta$  27.78 – 29.13 ppm arises from free HBpin.

**The reaction between zinc hydride III and 2a {NMR-Scale}:** The addition of **2a** (10.71 mg, 0.047 mmol) to a solution of complex **III** (0.020 g, 25 °C, 0.023 mmol) in  $d_8$ -toluene in a J. Young valve NMR tube after 1h at 60 °C resulted in the formation of compound **IV** and HBpin with 75% yield observed by multinuclear NMR spectroscopy.  $^1\text{H}$  and  $^{11}\text{B}$  NMR spectroscopy revealed that the reaction has reached an equilibrium best evident by the integration of resonance for Bpin moieties of **2a** and **IV**. Extended heating up to 24 h at 80 °C showed no change in the relative ratio of **2a** and **IV**, suggesting that the equilibrium position had already been reached before heating. NMR Yield: (75%).

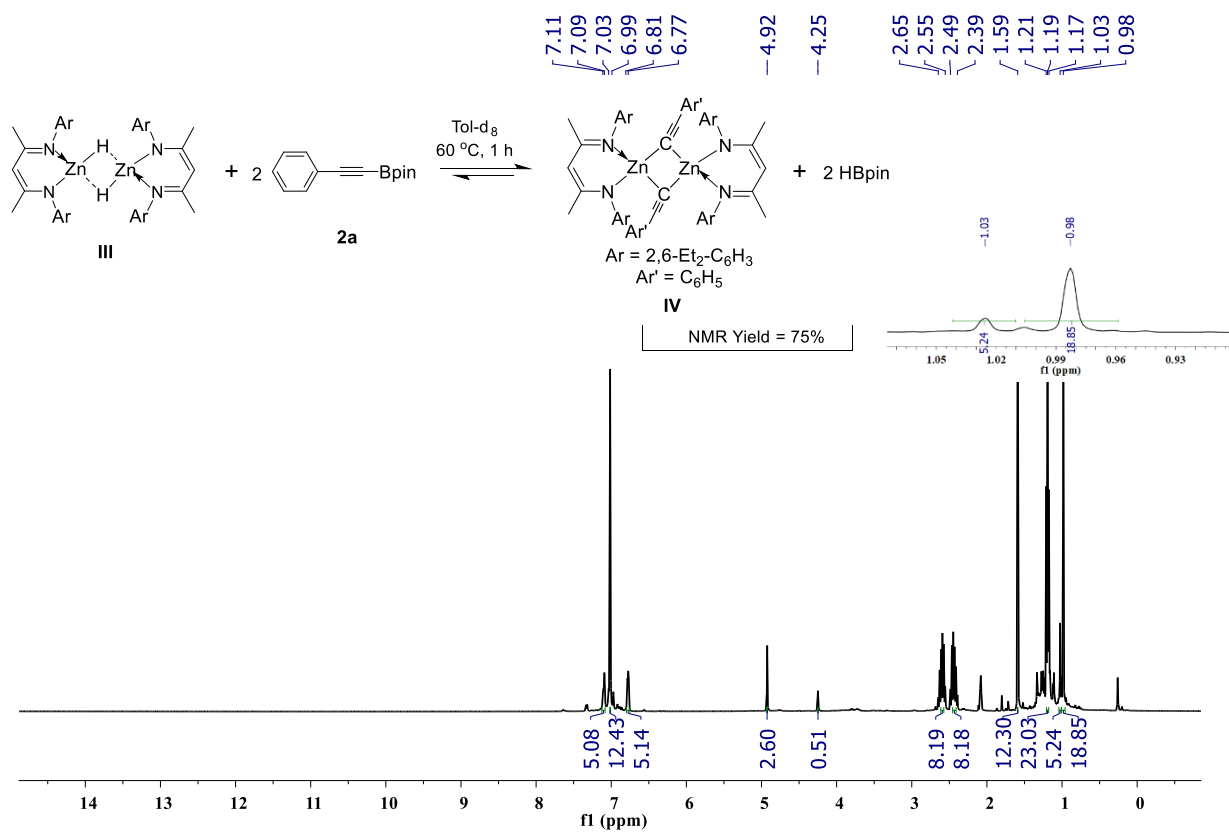

**Figure S28:**  $^1\text{H}$  NMR (400 MHz,  $25^\circ\text{C}$ ,  $d_8$ -toluene) spectrum of compounds IV & 2HBpin.

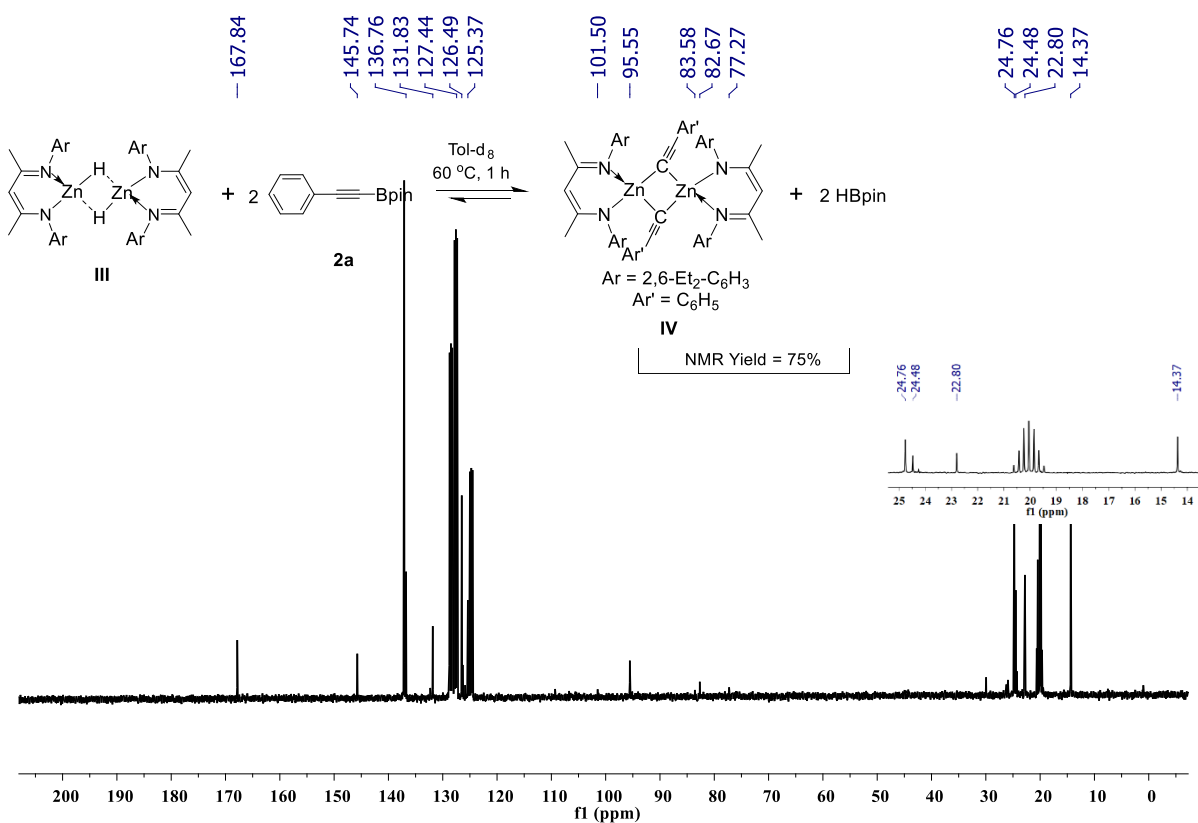

**Figure S29:**  $^{13}\text{C}\{^1\text{H}\}$  NMR (100 MHz,  $25^\circ\text{C}$ ,  $d_8$ -toluene) spectrum of compounds IV & 2HBpin.

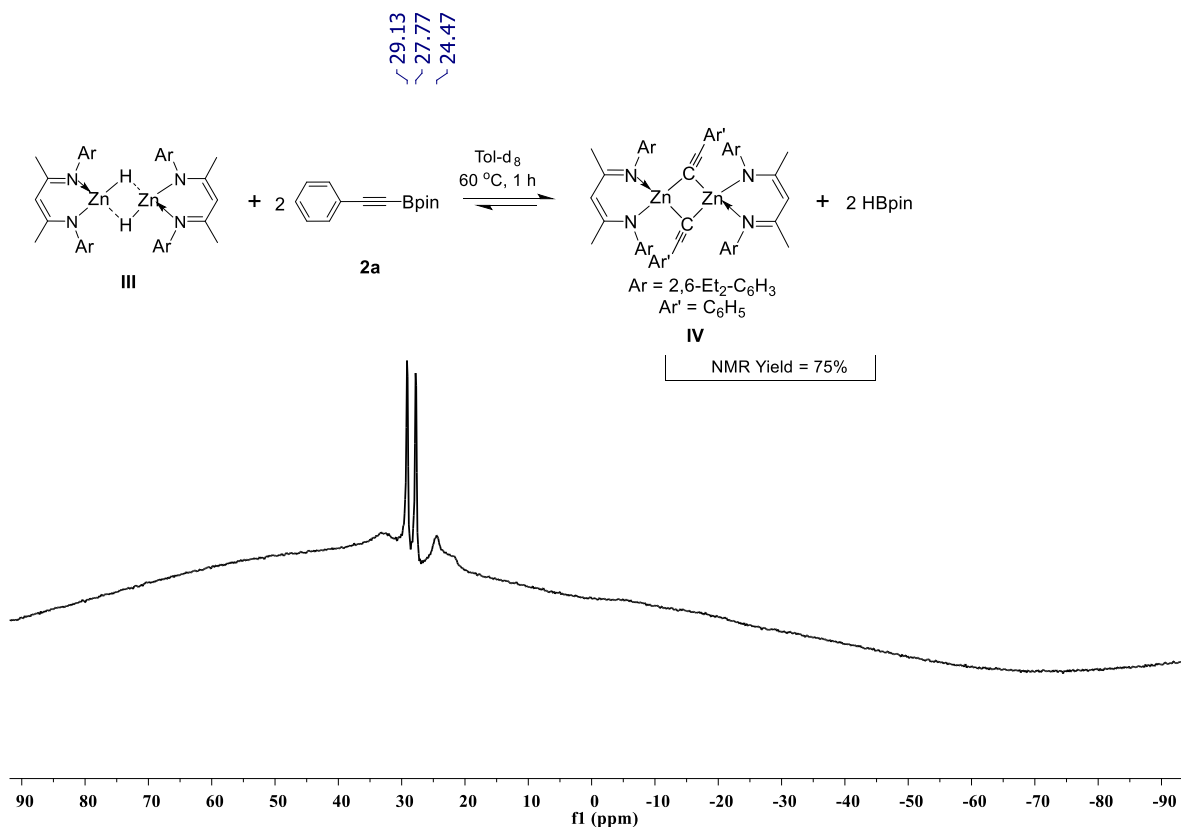

**Figure S30:**  $^{11}\text{B}$  NMR (128 MHz, 25 °C,  $d_8$ -toluene) spectrum of compounds **IV** & 2HBpin. A doublet peak at  $\delta$  27.77 – 29.13 ppm arises from free HBpin.

**Synthesis of compound IV and 2a {NMR-Scale}:** The addition of phenylacetylene (5.15  $\mu\text{L}$ , 0.047 mmol) to a J. Young valve NMR tube containing a solution of compound **III** and **2a** (25%) in  $d_8$ -toluene at room temperature after 20 min. resulted in the complete formation of compounds **IV** and **2a** was observed by  $^1\text{H}$  and  $^{11}\text{B}$  NMR spectroscopy. The above study indicates that once 25% of compound **III** and **2a** were formed, it immediately reacted with one additional equivalent of phenylacetylene to form a quantitative amount of product **2a** and compound **IV**. It stops the equilibrium reaction between compounds **IV** and **2a**. NMR Yield: (>99%).  $^1\text{H}$  NMR (700 MHz,  $d_8$ -toluene)  $\delta$  7.34 – 7.33 (m, 4H), 7.14 – 7.13 (m, 4H), 7.05 – 7.02 (m, 12H), 6.92 (t,  $^3J_{\text{HH}} = 7.1$  Hz, 3H), 6.88 (t,  $^3J_{\text{HH}} = 7.1$  Hz, 3H), 6.81 – 6.79 (m, 6H), 4.92 (s, 2H), 2.63 – 2.57 (m, 8H), 2.49 – 2.44 (m, 8H), 1.58 (s, 12 H), 1.21 (t,  $^3J_{\text{HH}} = 7.3$  Hz, 24H), 1.04 (s, 24H).  $^{13}\text{C}\{^1\text{H}\}$  NMR (176 MHz,  $d_8$ -toluene)  $\delta$  168.1, 145.5, 136.8, 132.2, 131.9,

131.8, 128.8, 128.0, 128.0, 126.4, 125.3, 122.4, 95.4, 83.5, 77.3, 29.9, 24.2, 22.8, 14.3.  $^{11}\text{B}$   
 NMR (128 MHz,  $\text{C}_6\text{D}_6$ )  $\delta$  24.38.

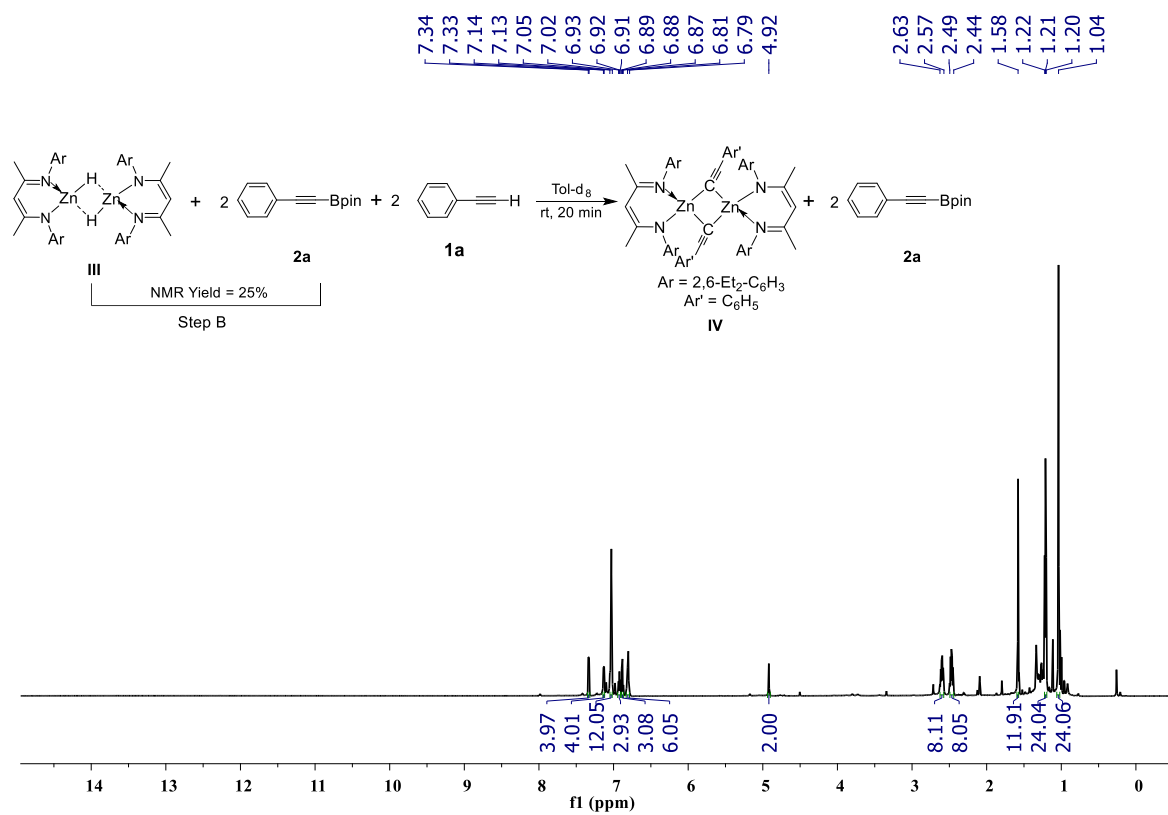

**Figure S31:**  $^1\text{H}$  NMR (700 MHz, 25 °C,  $d_8$ -toluene) spectrum of compounds IV & 2a.

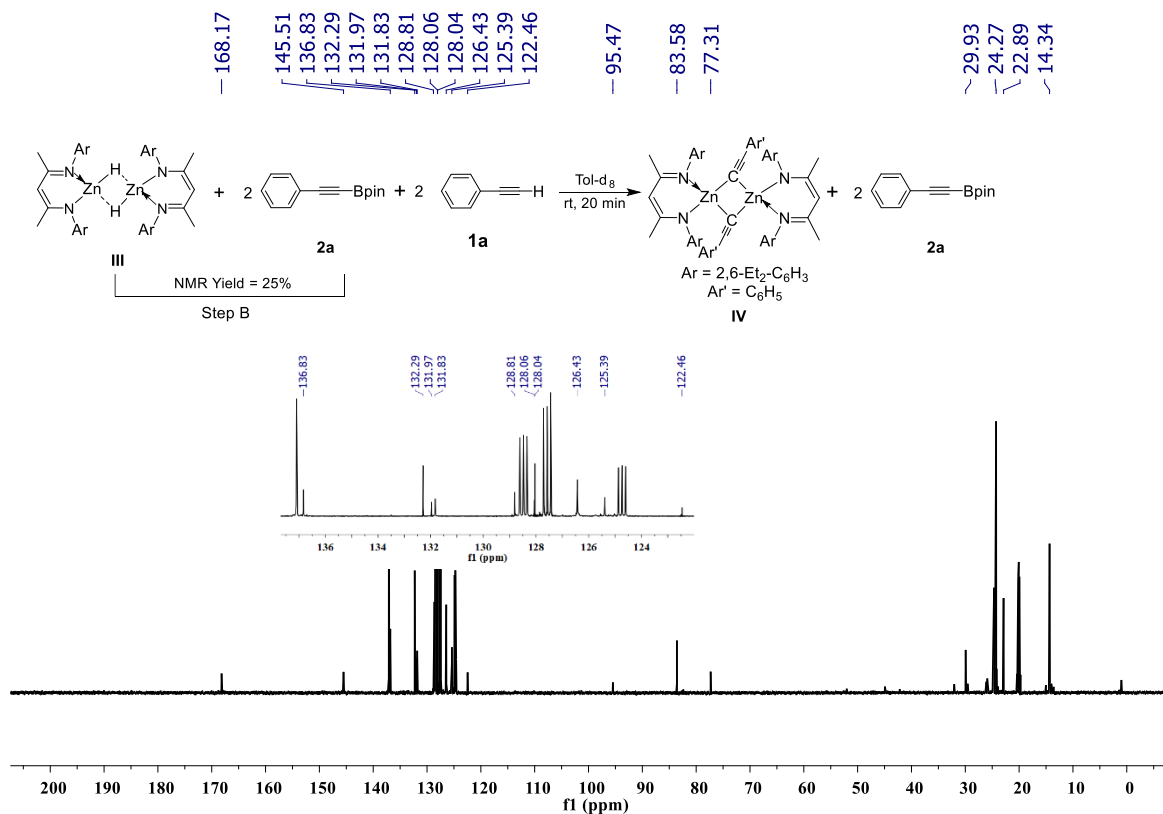

**Figure S32:**  $^{13}\text{C}\{^1\text{H}\}$  NMR (176 MHz, 25 °C,  $d_8$ -toluene) spectrum of compounds IV & 2a.

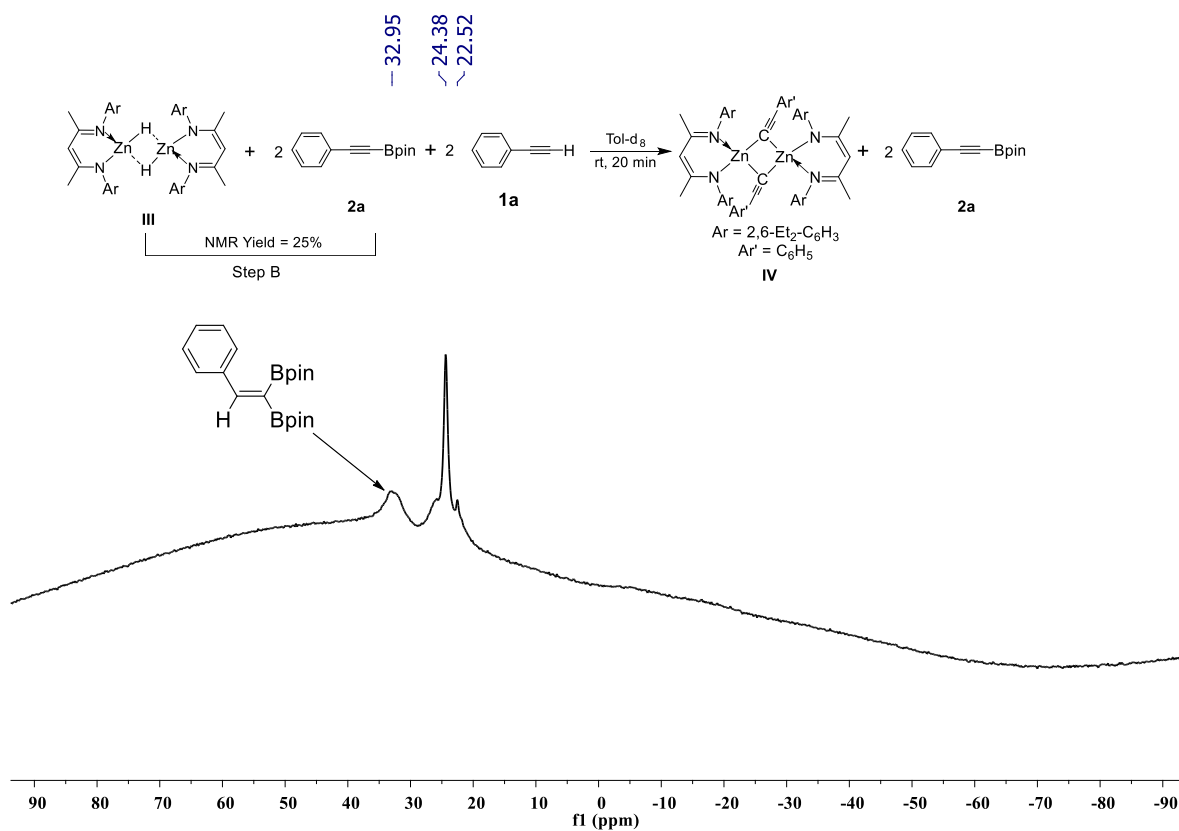

**Figure S33:**  $^{11}\text{B}$  NMR (128 MHz, 25 °C,  $\text{C}_6\text{D}_6$ ) spectrum of compounds IV & 2a.

**The reaction between zinc hydride **III**, phenylacetylene, and compound **2a** {NMR-Scale}:**

In a J. Young valve NMR tube (0.020 g, 25 °C, 0.023 mmol) complex **I**, (10.71 mg, 0.047 mmol) of **2a**, and (5.15  $\mu$ L, 0.047 mmol) of phenylacetylene were added successively in *d*<sub>8</sub>-toluene. Reaction progress was monitored by <sup>1</sup>H NMR analyses, which confirmed at room temperature after 25 min complete formation of compound **IV** with the liberation of H<sub>2</sub> gas, and unreacted compound **2a** was observed by <sup>1</sup>H and <sup>11</sup>B NMR spectroscopy. The above study indicates that the exclusive formation of compound **IV** with a quantitative yield and compound **2a** was untouched. It again revealed that phenylacetylene's presence stops the equilibrium reaction between compounds **III** and **2a**. NMR Yield: (>99%). <sup>1</sup>H NMR (700 MHz, *d*<sub>8</sub>-toluene)  $\delta$  7.34 – 7.33 (m, 4H), 7.14 – 7.13 (m, 4H), 7.05 – 7.02 (m, 12H), 6.92 (t, <sup>3</sup>J<sub>HH</sub> = 7.0 Hz, 3H), 6.88 (t, <sup>3</sup>J<sub>HH</sub> = 7.2 Hz, 3H), 6.81 – 6.78 (m, 6H), 4.92 (s, 2H), 2.63 – 2.57 (m, 8H), 2.49 – 2.44 (m, 8H), 1.58 (s, 12 H), 1.21 (t, <sup>3</sup>J<sub>HH</sub> = 7.3 Hz, 24H), 1.04 (s, 24H). <sup>13</sup>C{<sup>1</sup>H} NMR (176 MHz, *d*<sub>8</sub>-toluene)  $\delta$  168.1, 145.5, 136.8, 132.3, 131.9, 131.8, 128.8, 128.0, 128.0, 126.4, 125.4, 122.4, 95.4, 83.5, 77.3, 24.6, 24.2, 22.8, 14.3. <sup>11</sup>B NMR (128 MHz, *d*<sub>8</sub>-toluene)  $\delta$  24.70.



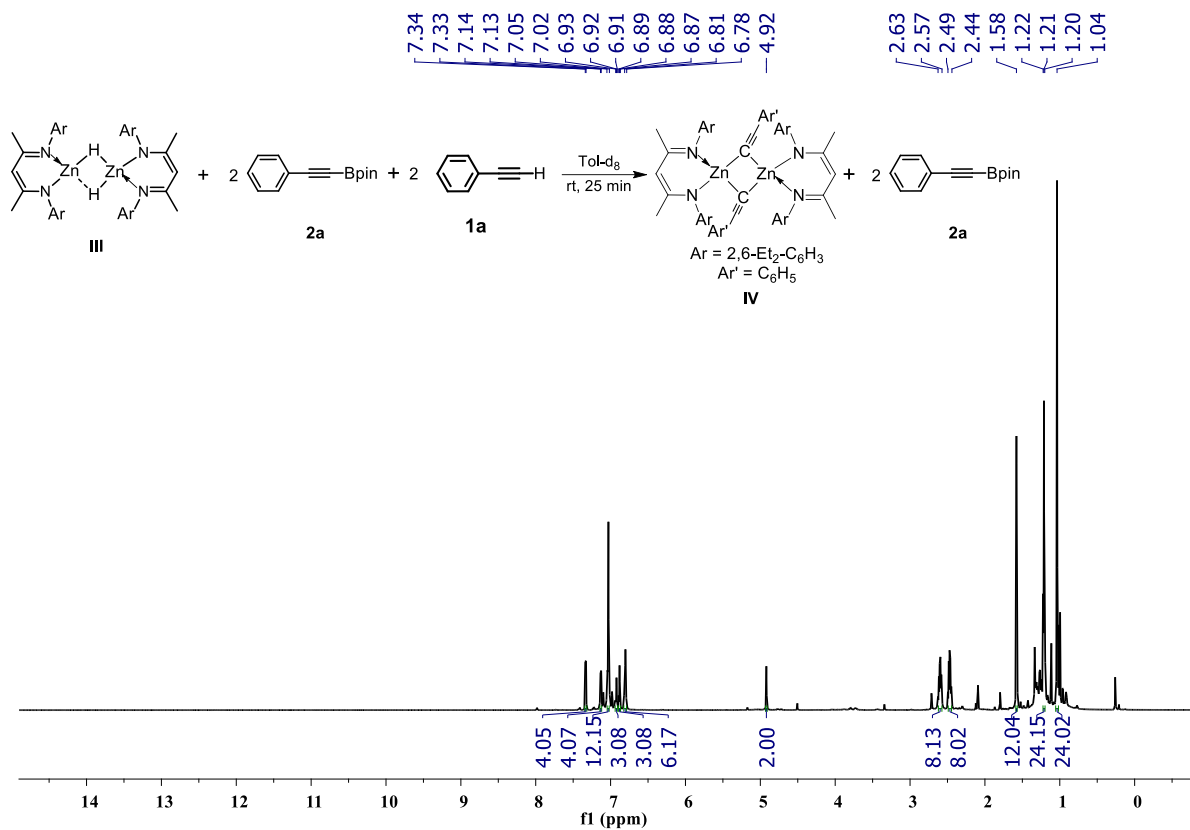

**Figure S34:** <sup>1</sup>H NMR (700 MHz, 25 °C, d<sub>8</sub>-toluene) spectrum of compounds IV & 2a.

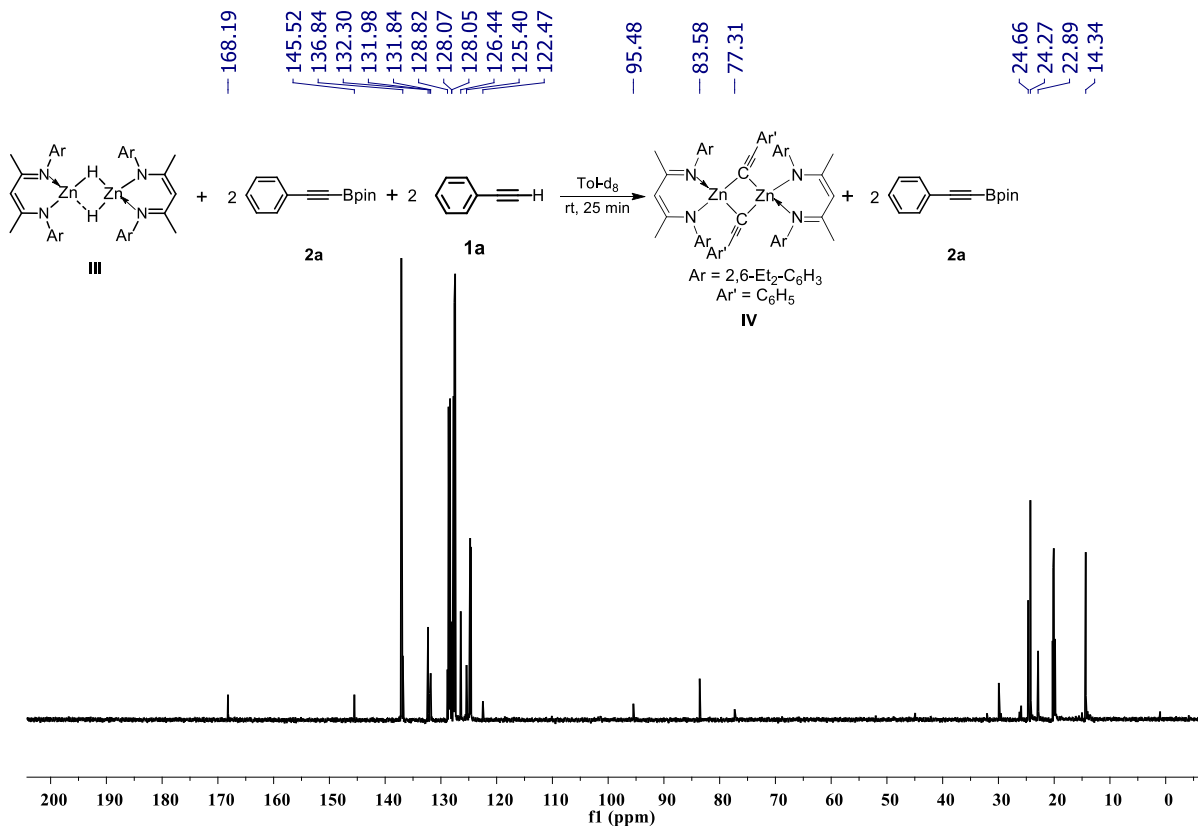

**Figure S35:** <sup>13</sup>C{<sup>1</sup>H} NMR (176 MHz, 25 °C, d<sub>8</sub>-toluene) spectrum of compounds IV & 2a.

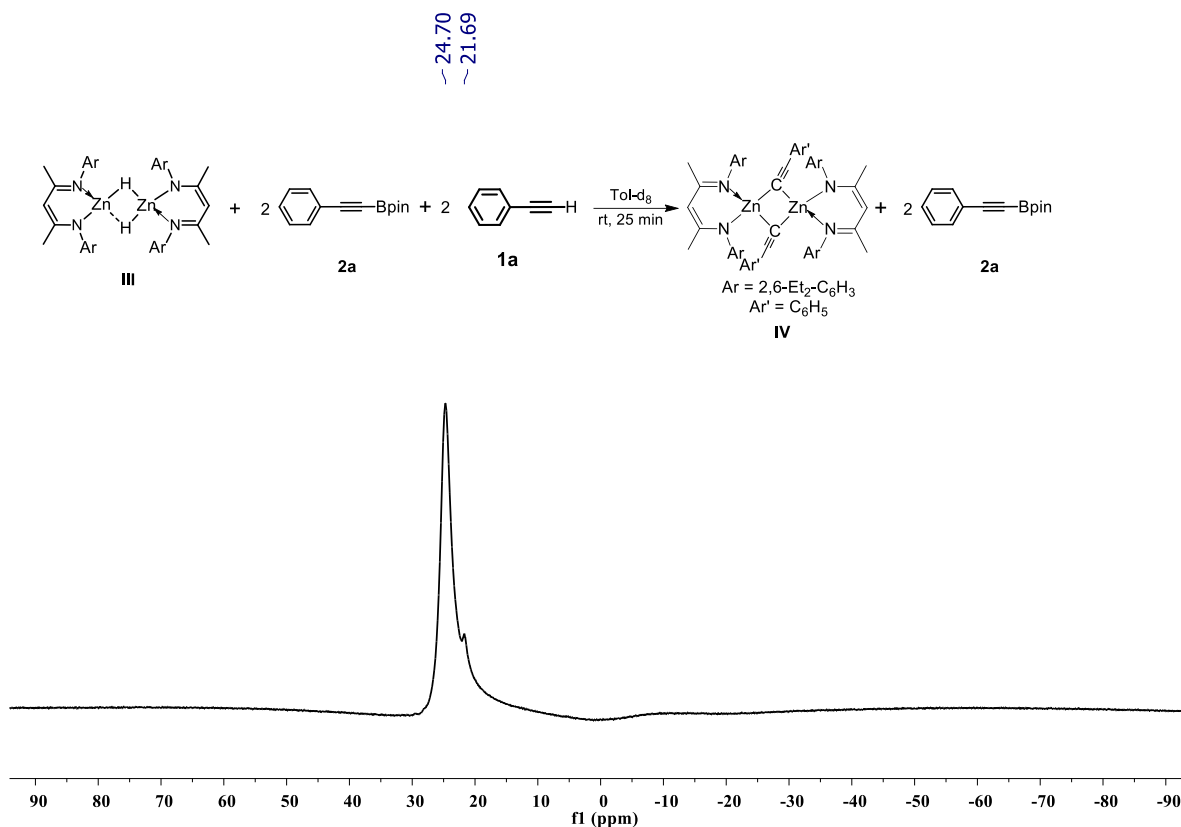

**Figure S36:**  $^{11}\text{B}$  NMR (128 MHz, 25 °C,  $d_8$ -toluene) spectrum of compounds **IV** & **2a**.

**Scheme S1. Stoichiometric Experiments for Dehydroborylation of Terminal Alkynes**

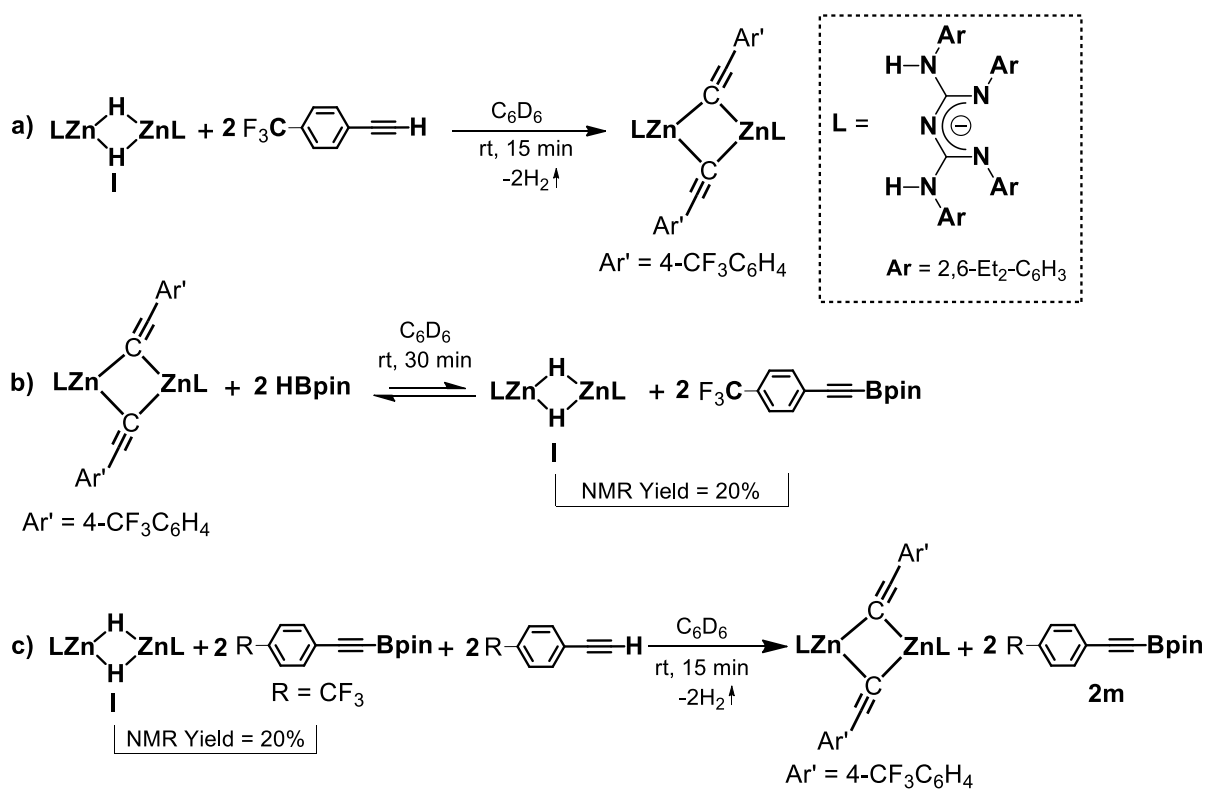

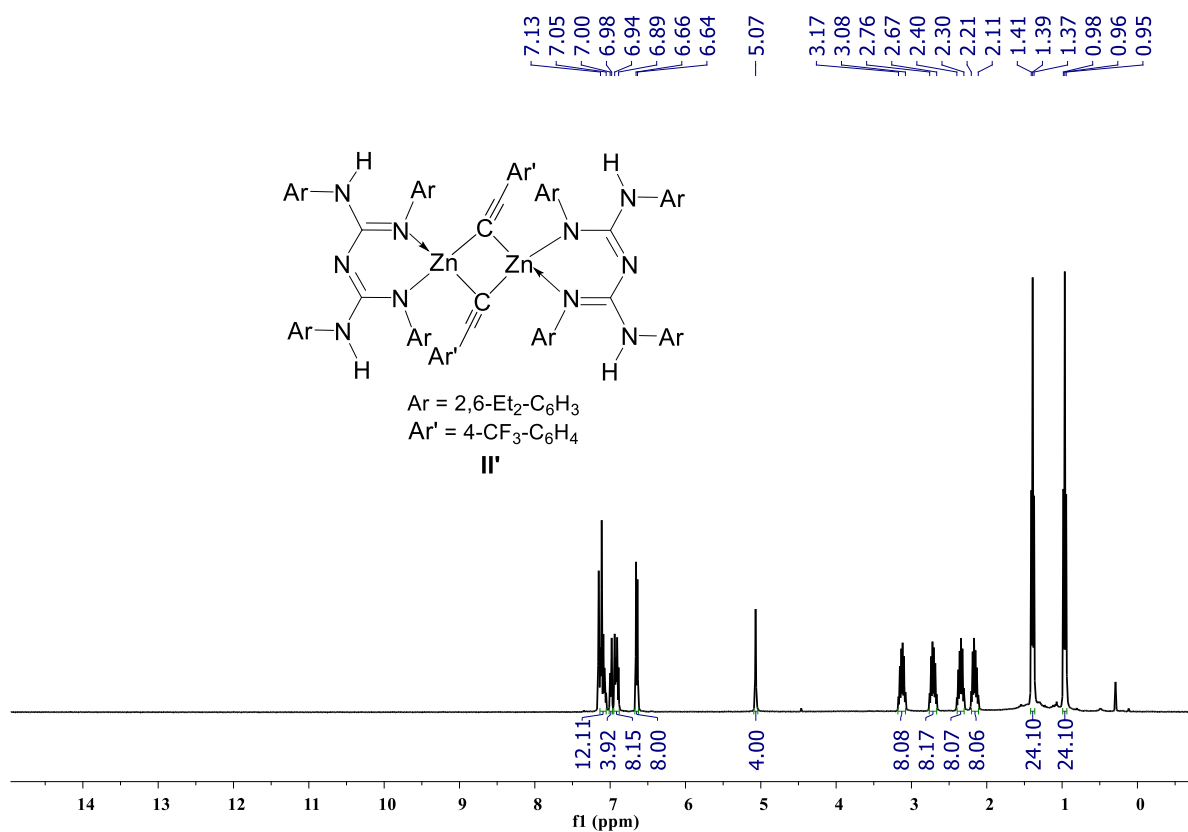

Figure S37: <sup>1</sup>H NMR (400 MHz, 25 °C, C<sub>6</sub>D<sub>6</sub>) spectrum of compound II'.

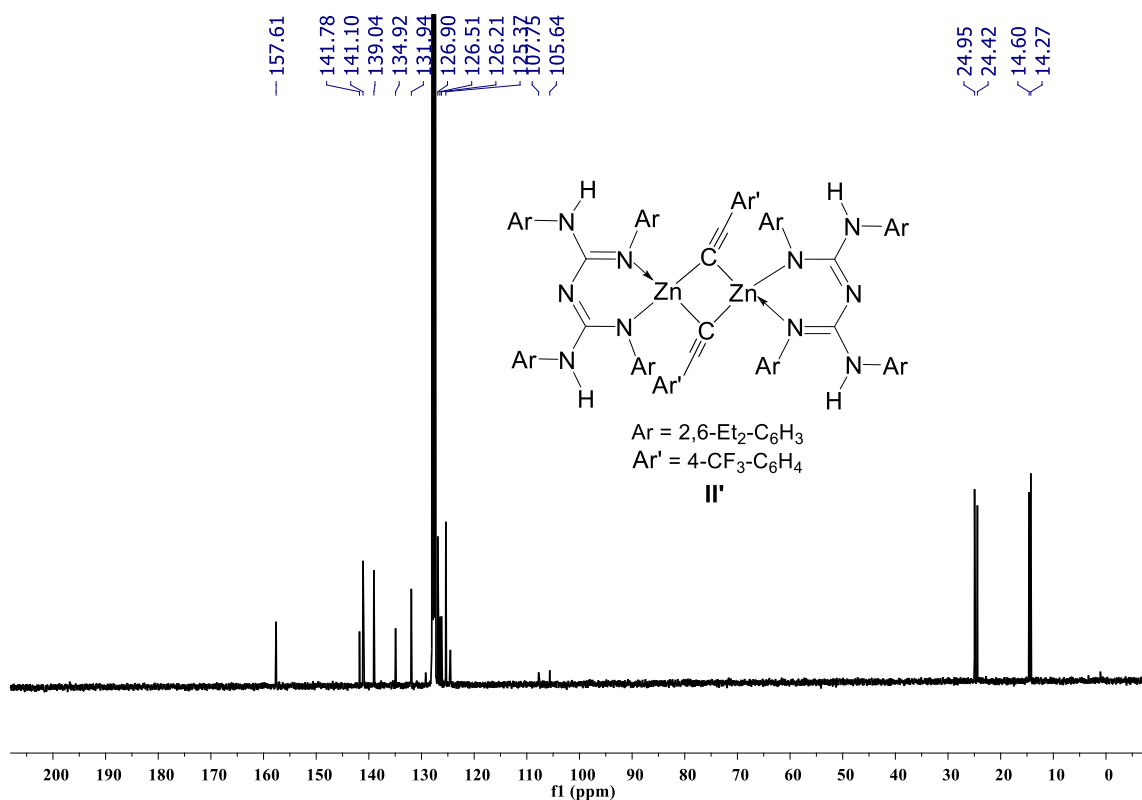

Figure S38: <sup>13</sup>C{<sup>1</sup>H} NMR (100 MHz, 25 °C, C<sub>6</sub>D<sub>6</sub>) spectrum of compound II'.

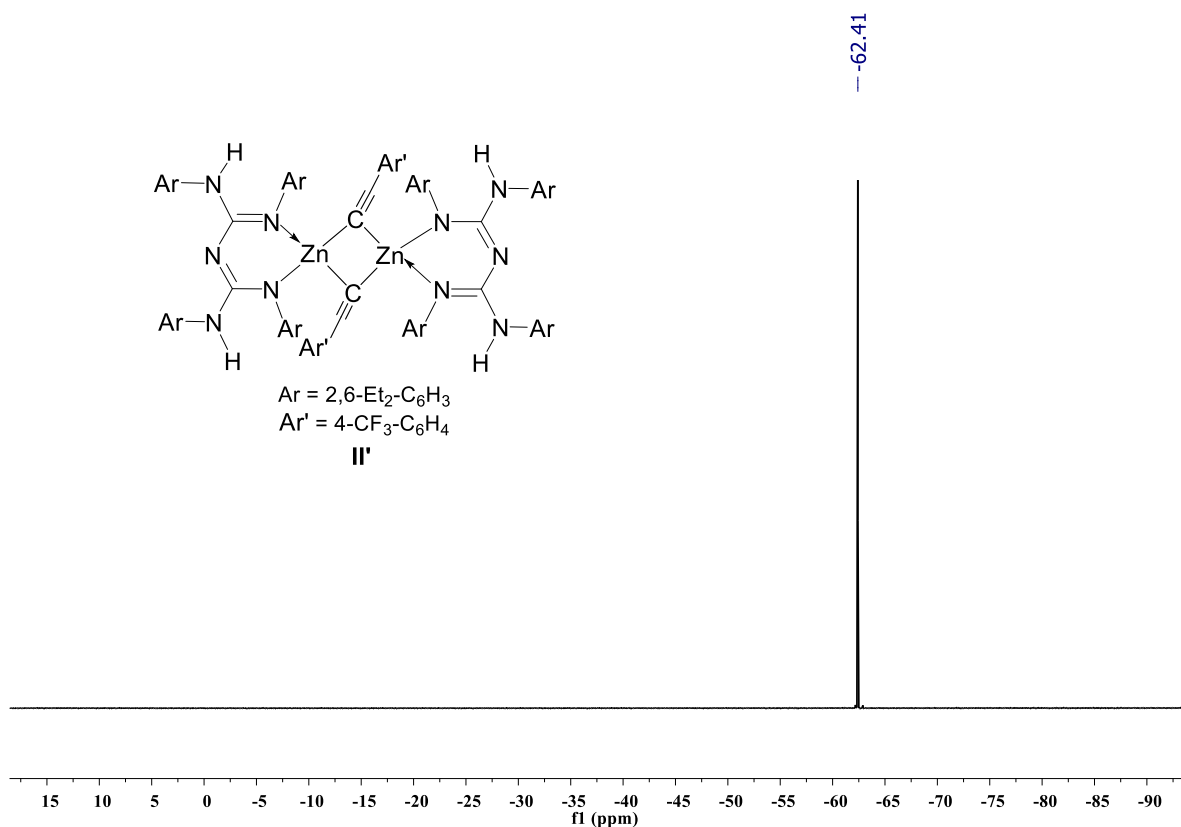

**Figure S39:**  $^{19}\text{F}\{^1\text{H}\}$  NMR (377 MHz, 25 °C,  $\text{C}_6\text{D}_6$ ) spectrum of compound **II'**.

**The reaction between zinc alkynyl **II'** and HBpin {NMR-Scale}:** The addition of HBpin (4.06  $\mu\text{L}$ , 0.028 mmol) to a J. Young valve NMR tube containing a solution of compound **II'** (0.014 mmol) in  $d_8$ -toluene at room temperature after 30 minutes resulted in the formation of compounds **I** and **2m** with a 20% yield were observed by multinuclear NMR spectroscopy.  $^1\text{H}$  and  $^{11}\text{B}$  NMR spectroscopy revealed that the reaction had reached an equilibrium, best evidenced by the integration of resonance for Bpin moieties of **2m** and HBpin. Extended heating up to 24 h at 80 °C showed no change in the relative ratio of **2m** and **II'**, suggesting that the equilibrium position had already been reached before heating. NMR Yield: (20%).

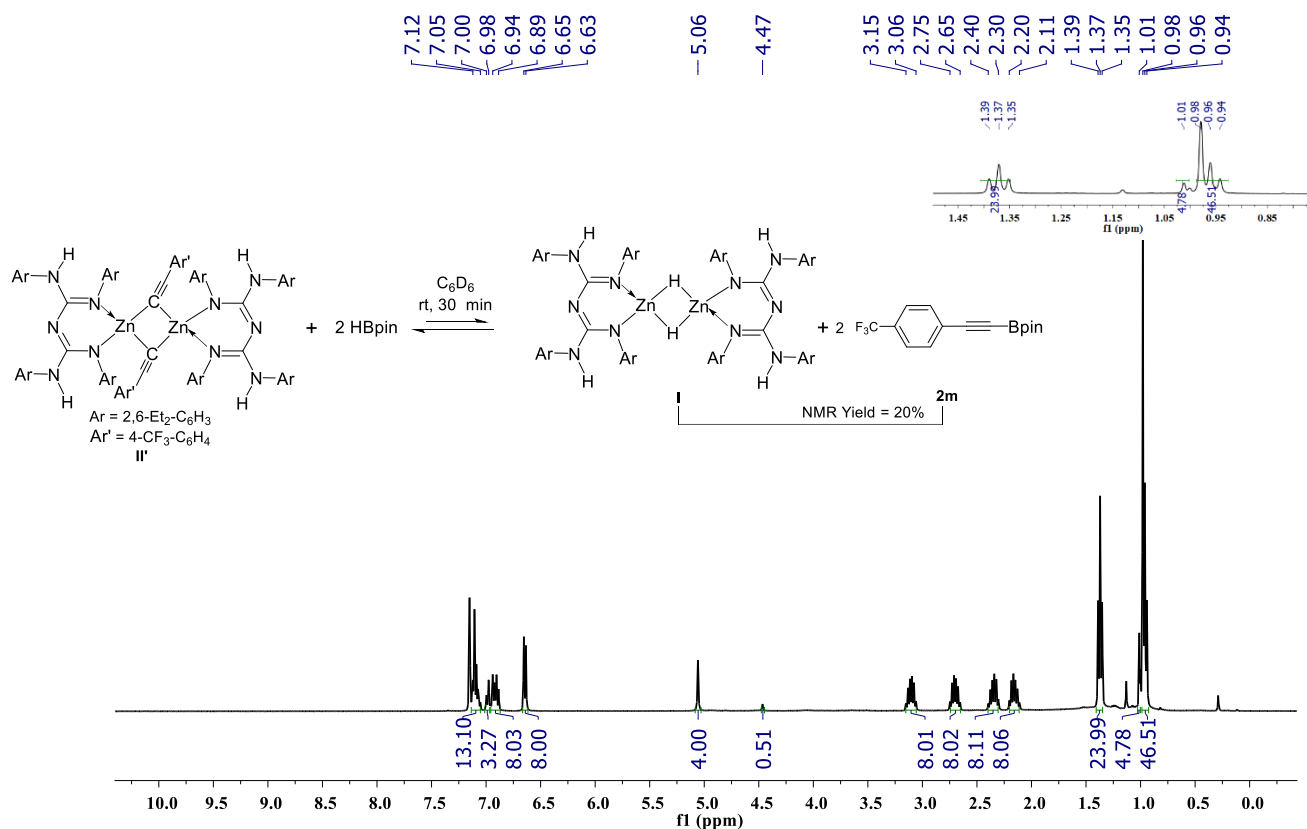

Figure 40:  $^1\text{H}$  NMR (400 MHz, 25 °C,  $\text{C}_6\text{D}_6$ ) spectrum of compounds  $[\text{L}^1\text{ZnH}]_2$  &  $2\text{m}$ .

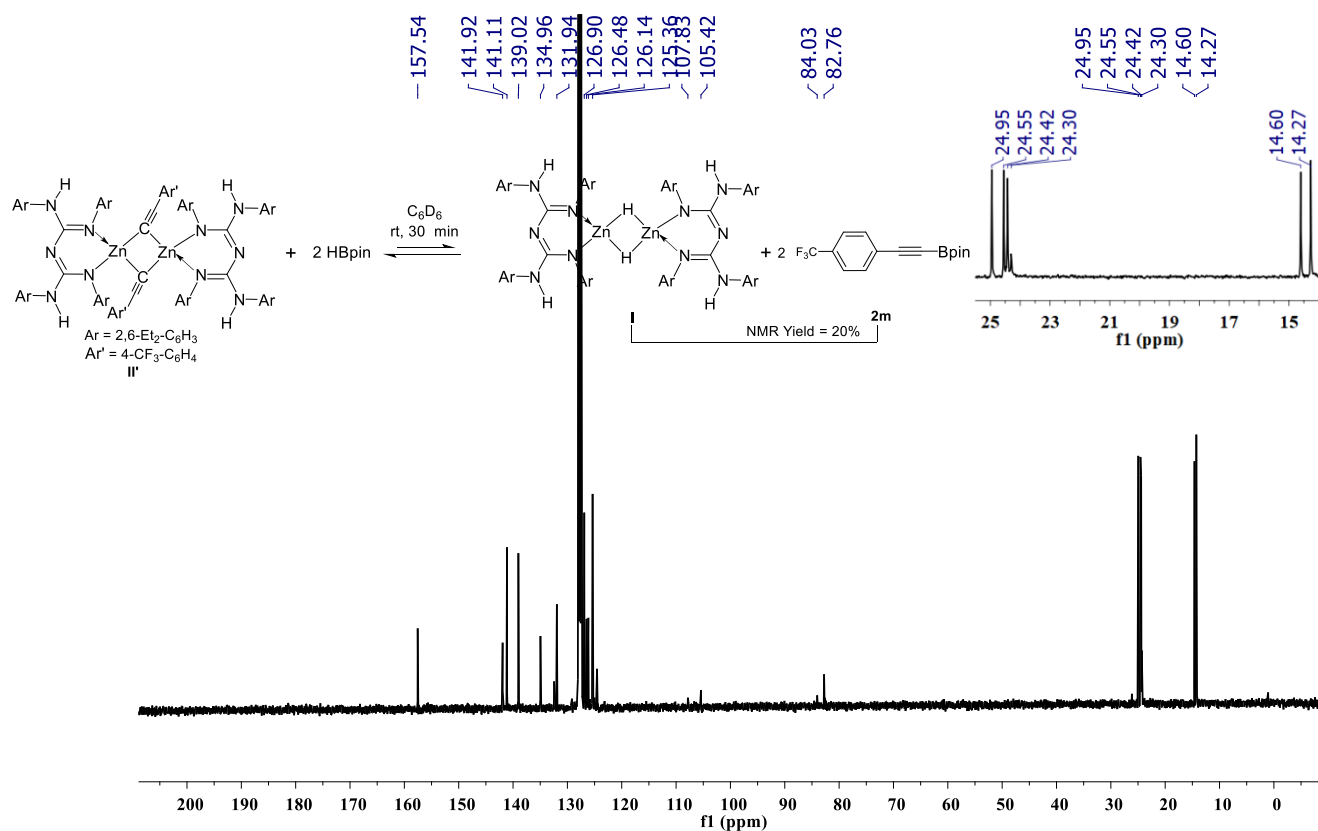

Figure S41:  $^{13}\text{C}\{^1\text{H}\}$  NMR (100 MHz, 25 °C,  $\text{C}_6\text{D}_6$ ) spectrum of compounds  $[\text{L}^1\text{ZnH}]_2$  &  $2\text{m}$ .

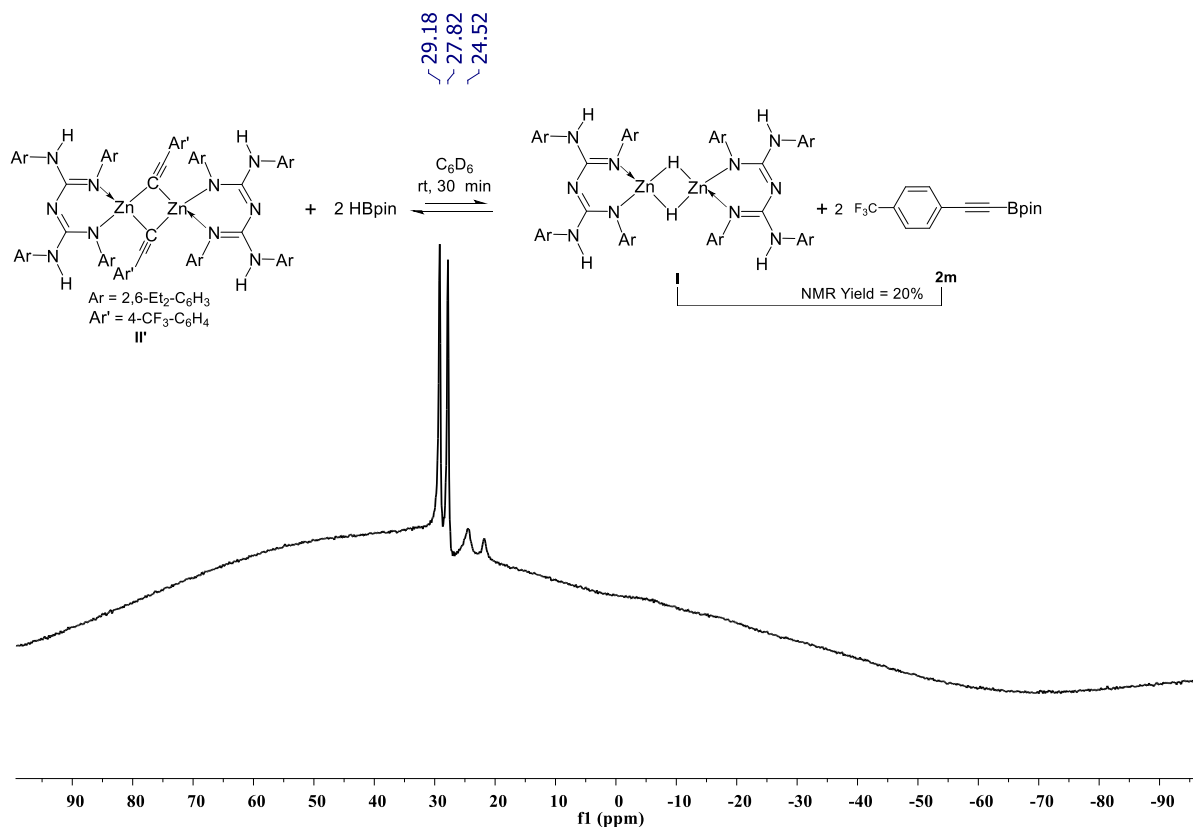

**Figure S42:**  $^{11}\text{B}$  NMR (128 MHz, 25 °C,  $\text{C}_6\text{D}_6$ ) spectrum of compounds  $[\text{L}^1\text{ZnH}]_2$  & **2m**. A doublet peak at  $\delta$  27.82 – 29.18 ppm arises from free HBpin.

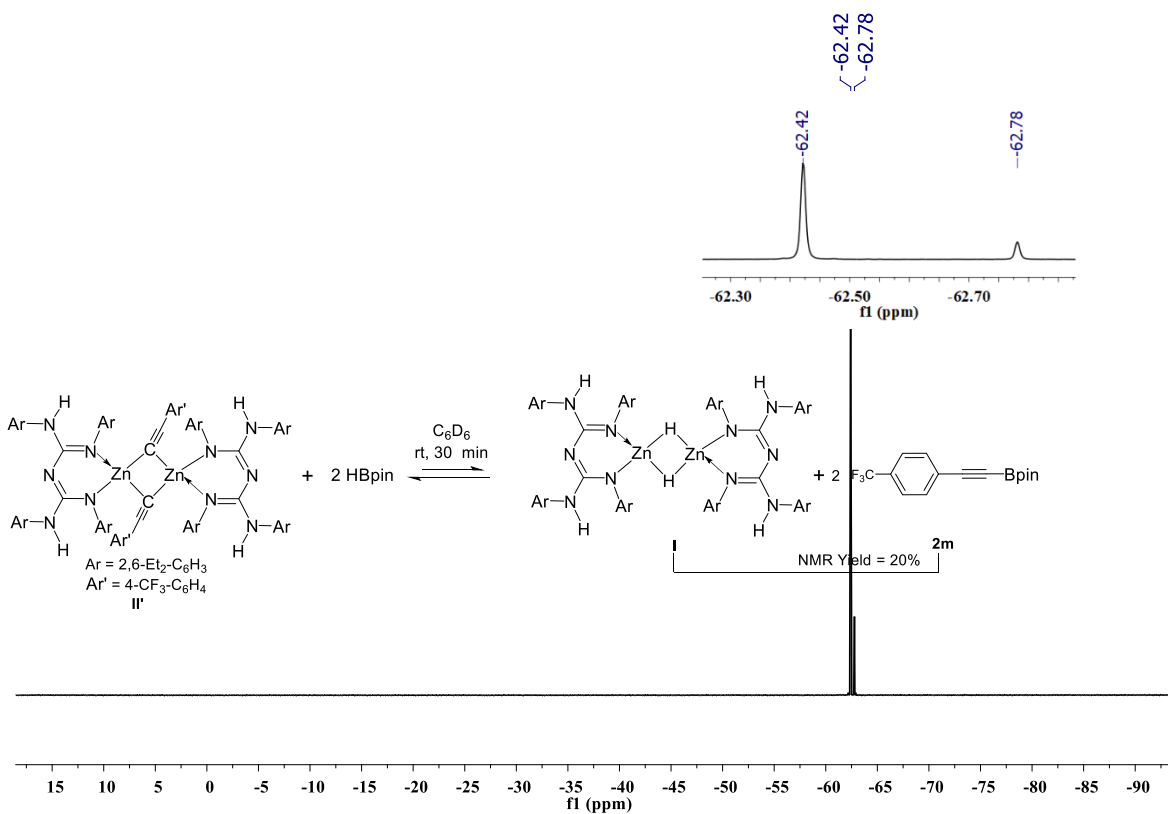

**Figure S43:**  $^{19}\text{F}\{^1\text{H}\}$  NMR (377 MHz, 25 °C,  $\text{C}_6\text{D}_6$ ) spectrum of compounds  $[\text{L}^1\text{ZnH}]_2$  & **2m**.

**Synthesis of compound II' and 2m {NMR-Scale}: The addition of 4-(trifluoromethyl)phenylacetylene (1m) (4.5  $\mu$ L, 0.028 mmol) to a J. Young valve NMR tube containing a solution of compound I and 2m (20%) in  $d_8$ -toluene at room temperature after 15 minutes resulted in the complete formation of compound II' and 2m was observed by  $^1\text{H}$  and  $^{11}\text{B}$  NMR spectroscopy. The above study indicates that once 20% compound 2m and I was formed, it immediately reacted with one additional equivalent of 4-(trifluoromethyl)phenylacetylene to form a quantitative amount of product 2m and compound II'. It stops the equilibrium reaction between compounds or II' and 2m. NMR Yield: (>99%).**

$^1\text{H}$  NMR (400 MHz,  $\text{C}_6\text{D}_6$ )  $\delta$  7.12 – 7.07 (m, 16H), 6.99 – 6.89 (m, 16H), 6.65 – 6.63 (d,  $^3J_{\text{HH}} = 9.6$  Hz, 8H), 5.07 (s, 4H), 3.16 – 3.07 (m, 8H), 2.75 – 2.66 (m, 8H), 2.39 – 2.30 (m, 8H), 2.20 – 2.11 (m, 8H), 1.39 (t,  $^3J_{\text{HH}} = 7.4$  Hz, 24H), 1.01 (s, 24H), 0.96 (t,  $^3J_{\text{HH}} = 7.6$  Hz, 24H).

$^{13}\text{C}\{^1\text{H}\}$  NMR (101 MHz,  $\text{C}_6\text{D}_6$ )  $\delta$  157.6, 141.7, 141.0, 139.0, 134.9, 132.4, 131.9, 126.9, 126.5, 126.3, 126.2, 125.0, 125.0, 125.0, 124.9, 124.5, 124.5, 124.5, 124.4, 107.7, 105.4, 84.0, 24.9, 24.4, 24.3, 14.6, 14.2.  $^{11}\text{B}$  NMR (128 MHz,  $\text{C}_6\text{D}_6$ )  $\delta$  24.60.  $^{19}\text{F}\{^1\text{H}\}$  NMR (377 MHz,  $\text{C}_6\text{D}_6$ )  $\delta$  -62.42, -62.78.

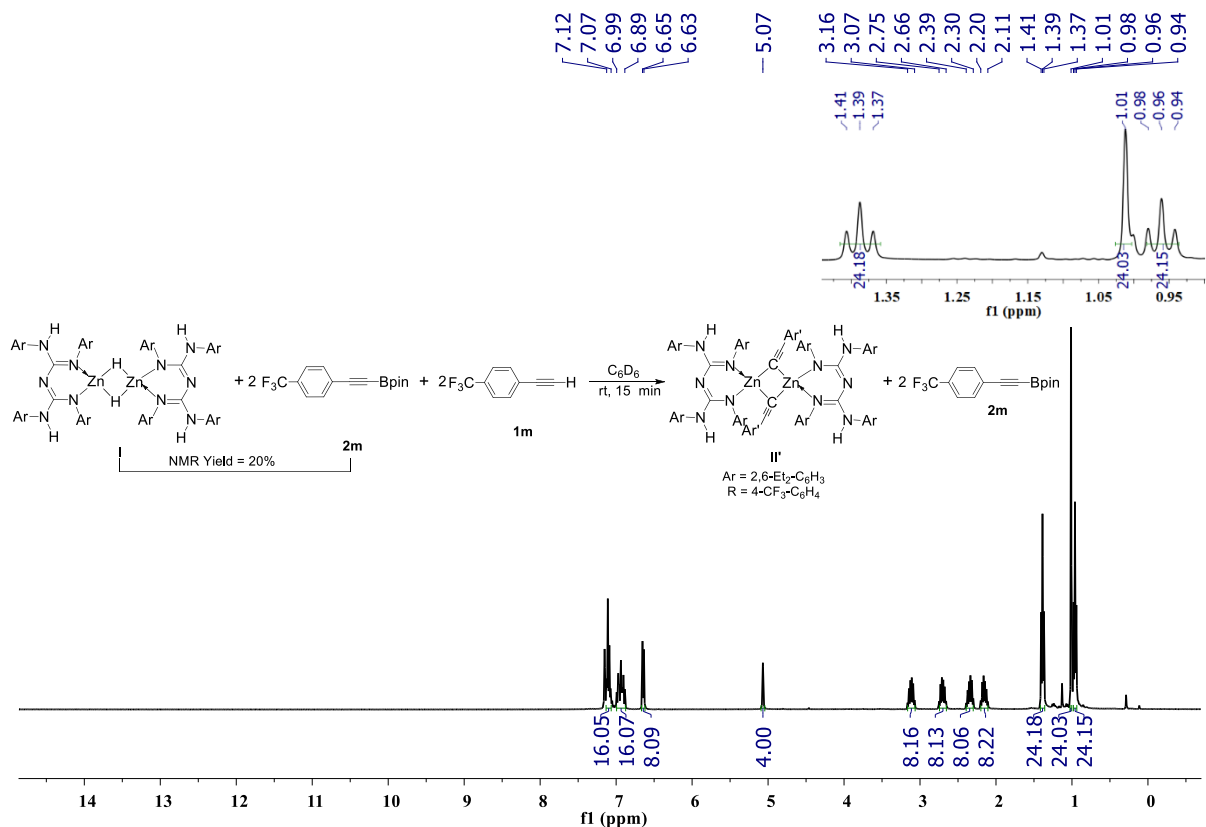

**Figure S44:**  $^1\text{H}$  NMR (400 MHz, 25 °C,  $\text{C}_6\text{D}_6$ ) spectrum of compounds II' & 2m.

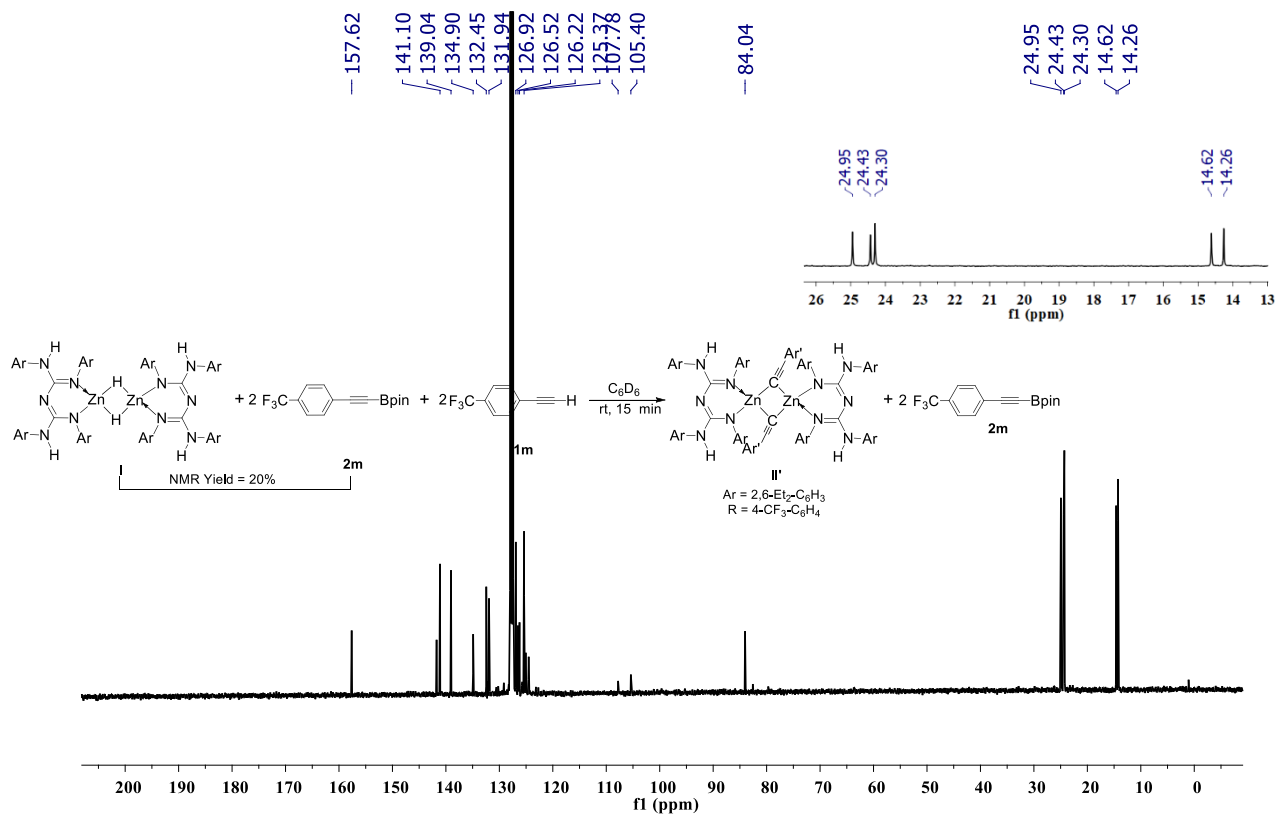

**Figure S45:**  $^{13}\text{C}\{^1\text{H}\}$  NMR (100 MHz, 25 °C,  $\text{C}_6\text{D}_6$ ) spectrum of compounds II' & 2m.



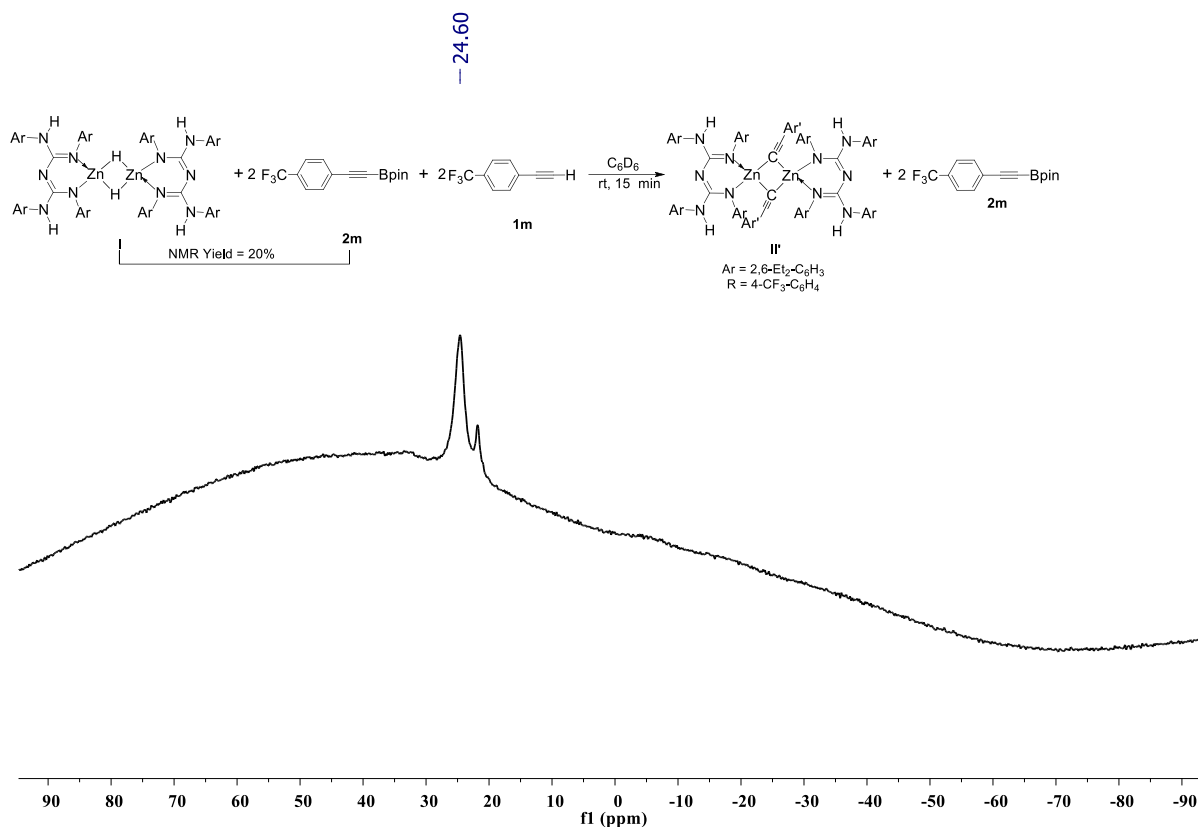

**Figure S46:** <sup>11</sup>B NMR (128 MHz, 25 °C, C<sub>6</sub>D<sub>6</sub>) spectrum of compounds II' & 2m.

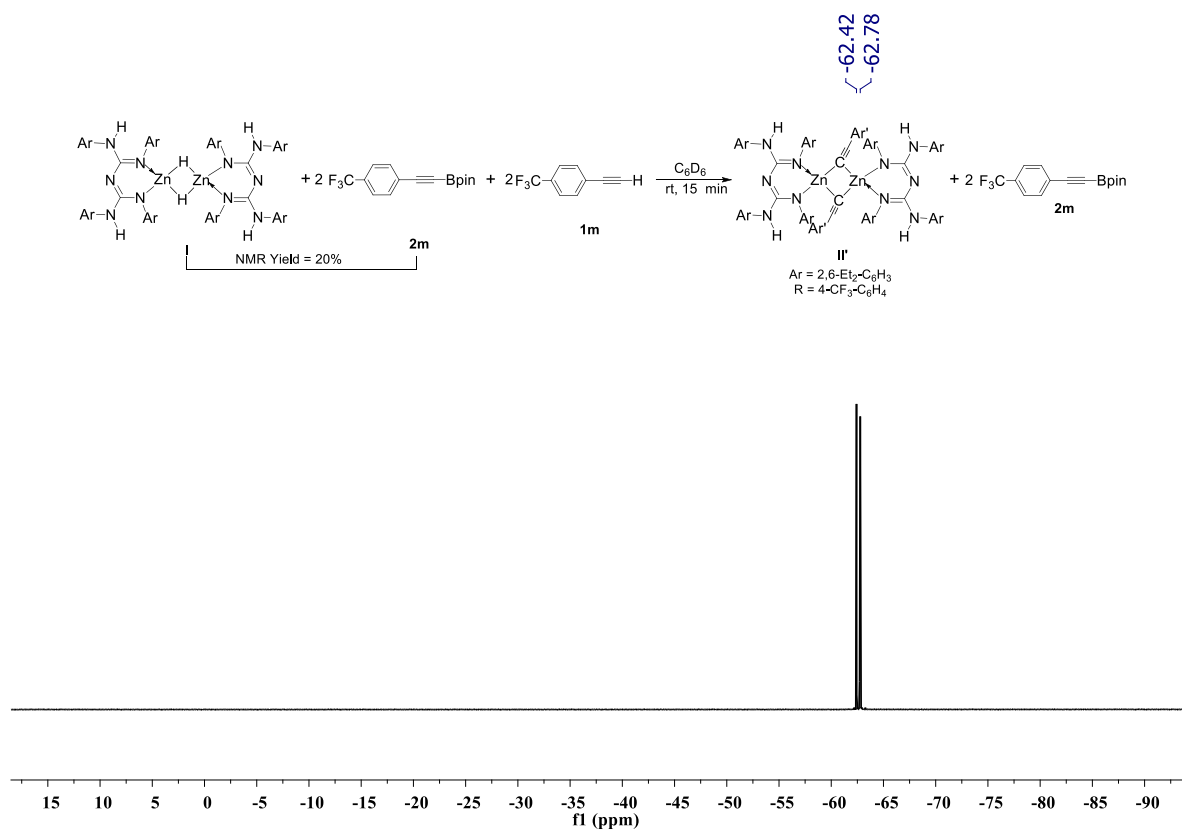

**Figure S47:** <sup>19</sup>F{<sup>1</sup>H} NMR (377 MHz, 25 °C, C<sub>6</sub>D<sub>6</sub>) spectrum of compounds II' & 2m.

## Scheme S2. Stoichiometric Experiments for Dehydroborylation of Terminal Alkynes

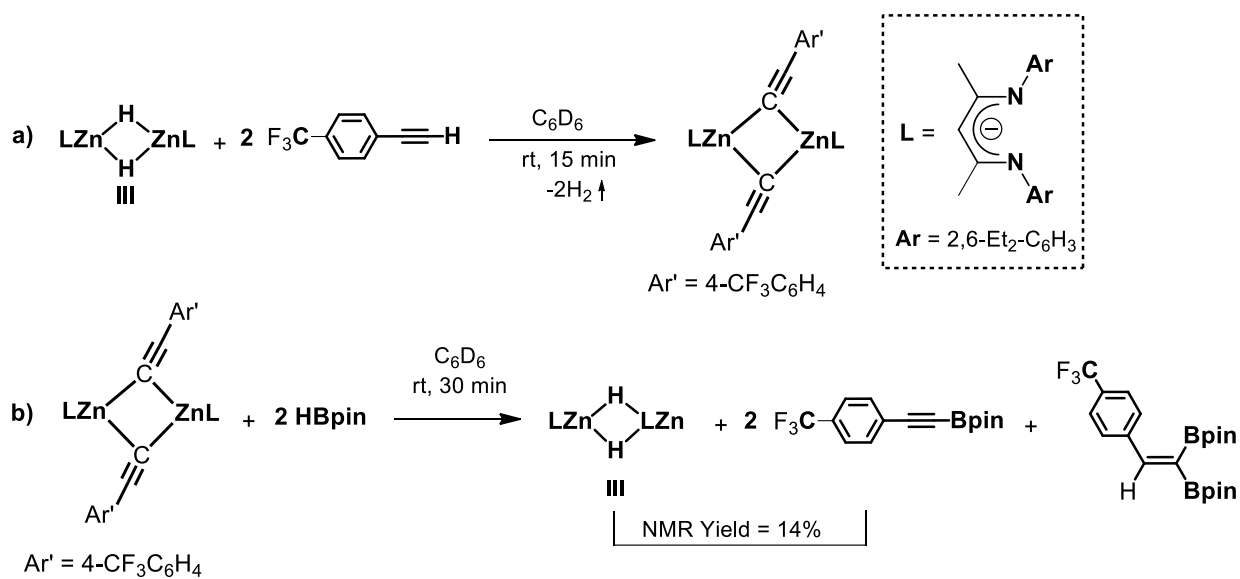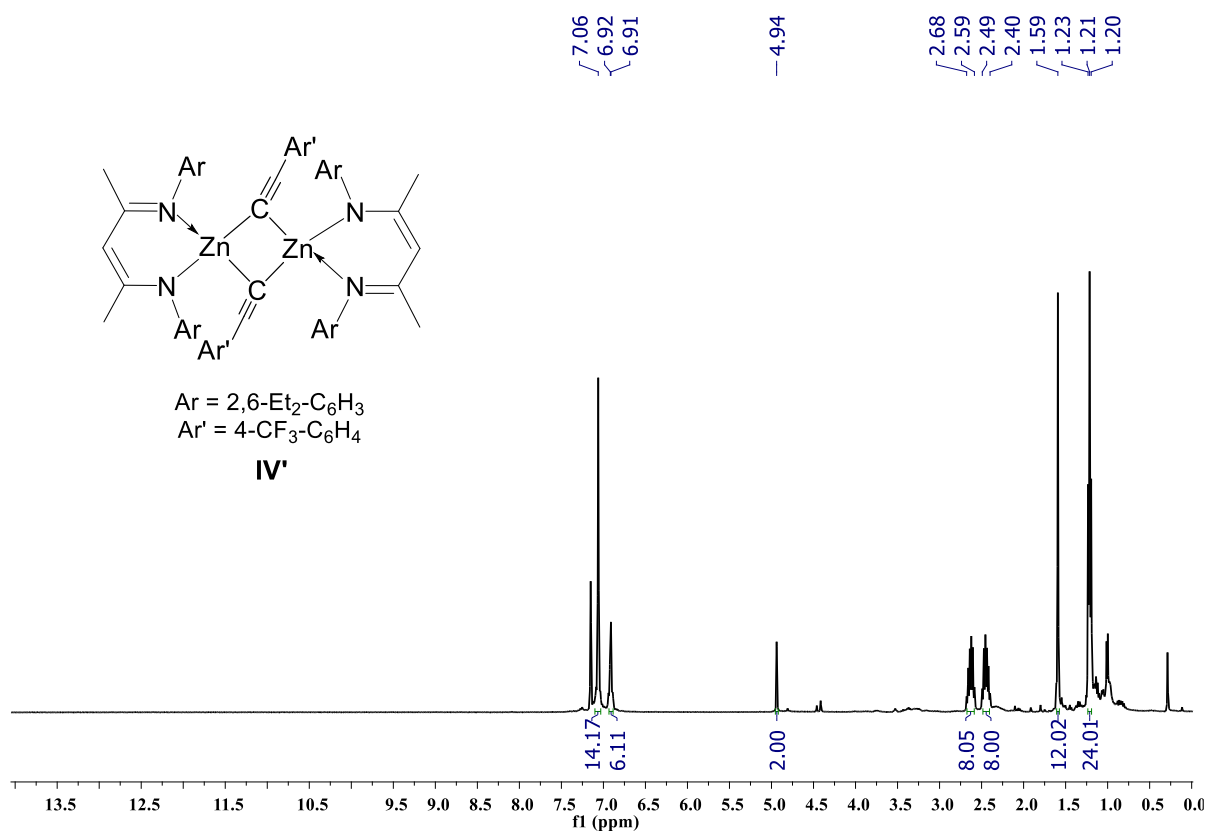

Figure S48:  $^1\text{H}$  NMR (400 MHz, 25 °C,  $\text{C}_6\text{D}_6$ ) spectrum of compound IV'.

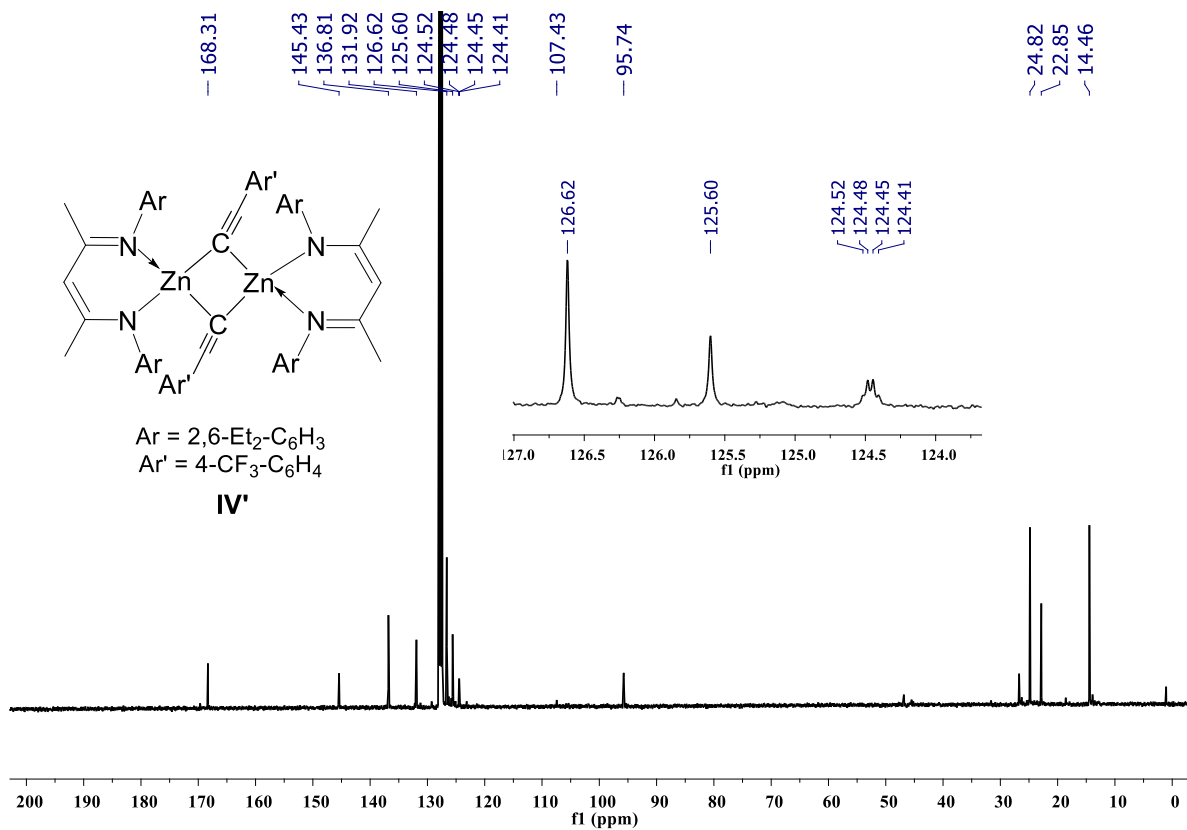

**Figure S49:** <sup>13</sup>C{<sup>1</sup>H} NMR (400 MHz, 25 °C, C<sub>6</sub>D<sub>6</sub>) spectrum of compound IV'.

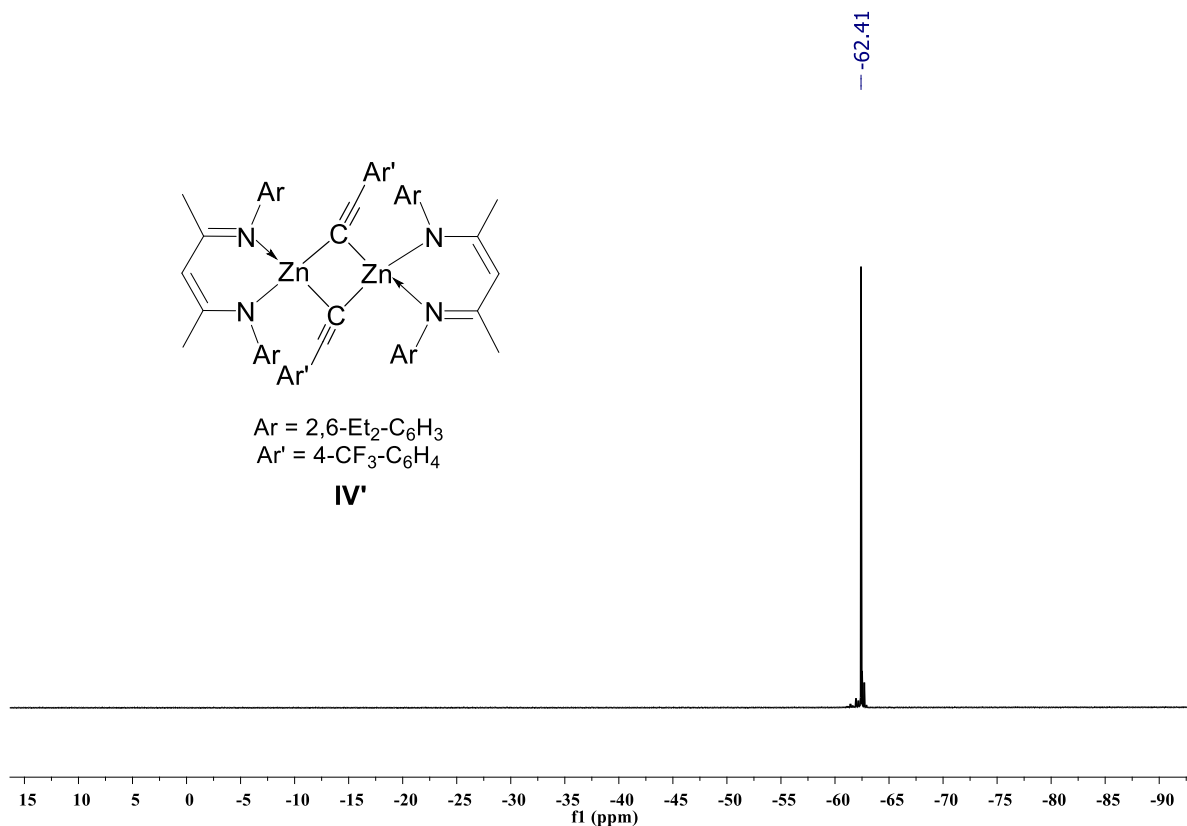

**Figure S50:** <sup>19</sup>F{<sup>1</sup>H} NMR (377 MHz, 25 °C, C<sub>6</sub>D<sub>6</sub>) spectrum of compound IV'.

**The reaction between zinc alkynyl IV' and HBpin {NMR-Scale}: The addition of HBpin (6.81  $\mu$ L, 0.047 mmol) to a J. Young valve NMR tube containing a solution of compound IV' (0.023 mmol) in  $C_6D_6$  at room temperature after 30 minutes resulted in the formation of compounds **III** and **2m** with a 14% yield along with 1,1-diborylated alkenes product are confirmed by multinuclear NMR ( $^1H$ ,  $^{13}C\{^1H\}$ ,  $^{11}B$ ,  $^{19}F\{^1H\}$ ). When prolonged the heating, the alkynylborates convert to the 1,1-diborylated alkenes are observed by  $^{11}B$  NMR.**

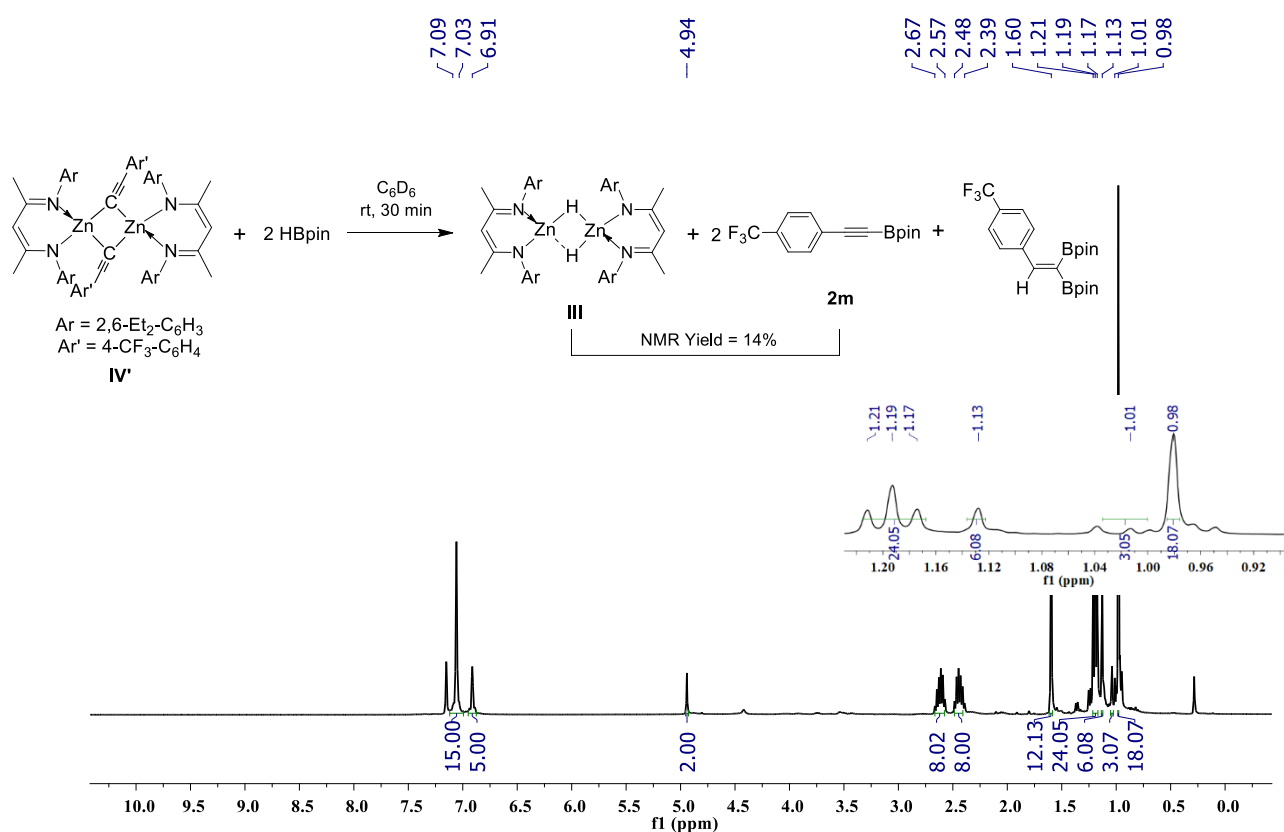

**Figure S51:**  $^1H$  NMR (400 MHz, 25 °C,  $C_6D_6$ ) spectrum of compounds  $[L^2ZnH]_2$  & **2m**.

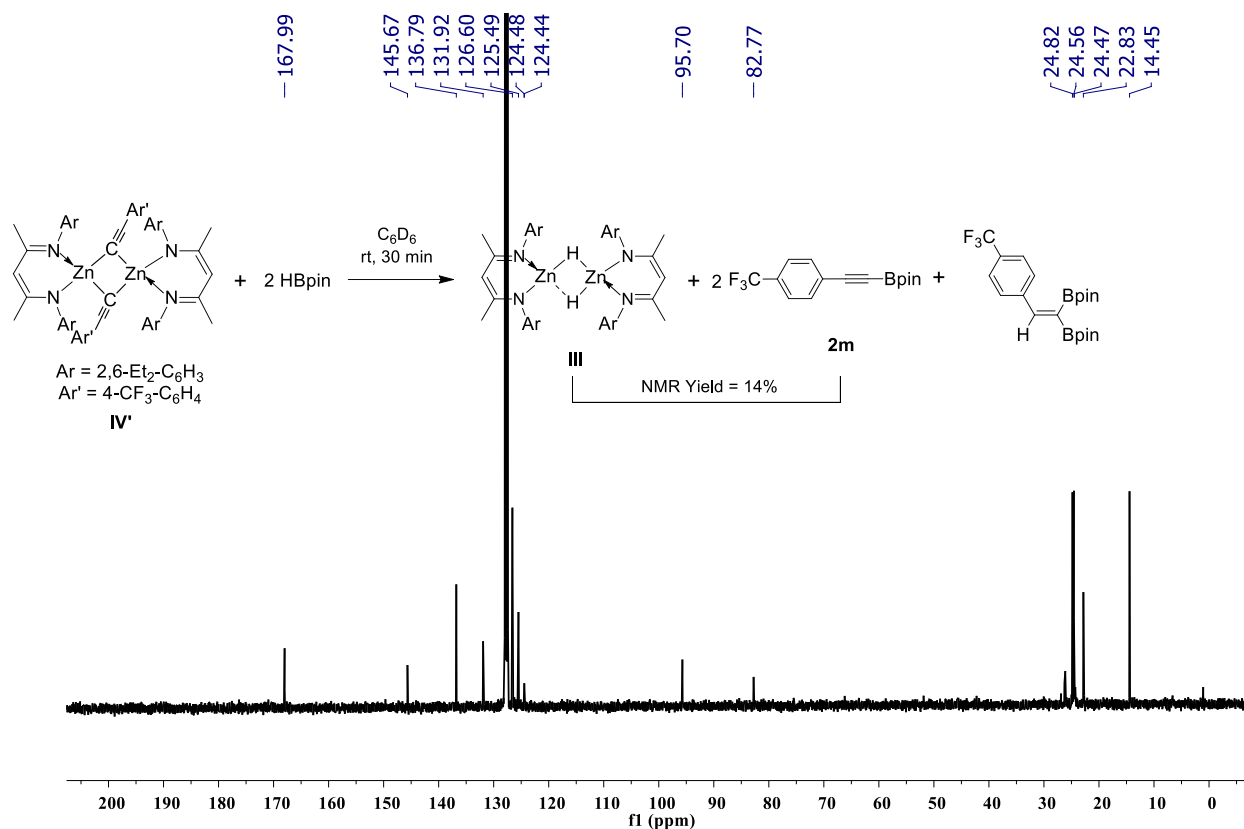

**Figure S52:** <sup>13</sup>C{<sup>1</sup>H} NMR (100 MHz, 25 °C, C<sub>6</sub>D<sub>6</sub>) spectrum of compounds [L<sup>2</sup>ZnH]<sub>2</sub> & 2m.

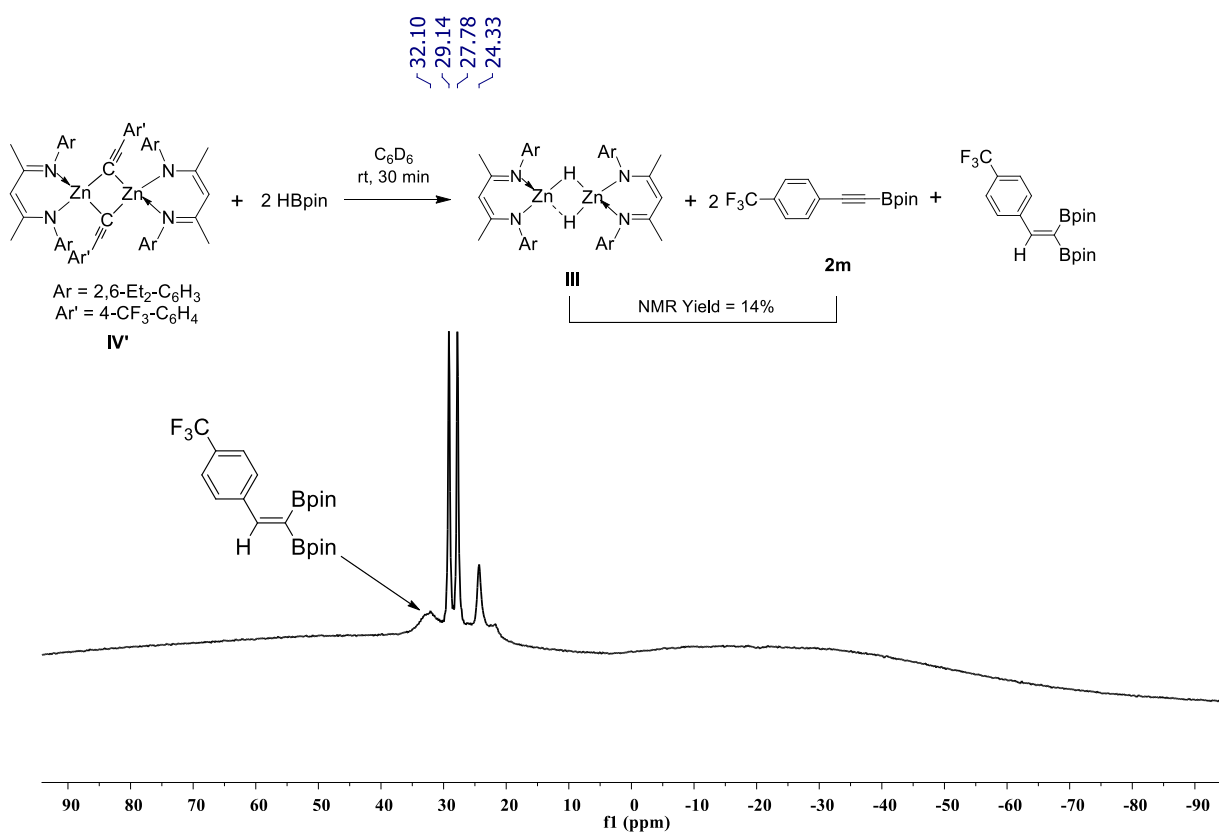

**Figure S53:** <sup>11</sup>B NMR (128 MHz, 25 °C, C<sub>6</sub>D<sub>6</sub>) spectrum of compounds [L<sup>2</sup>ZnH]<sub>2</sub> & 2m. A doublet peak at δ 27.78 – 29.14 ppm arises from free HBpin.

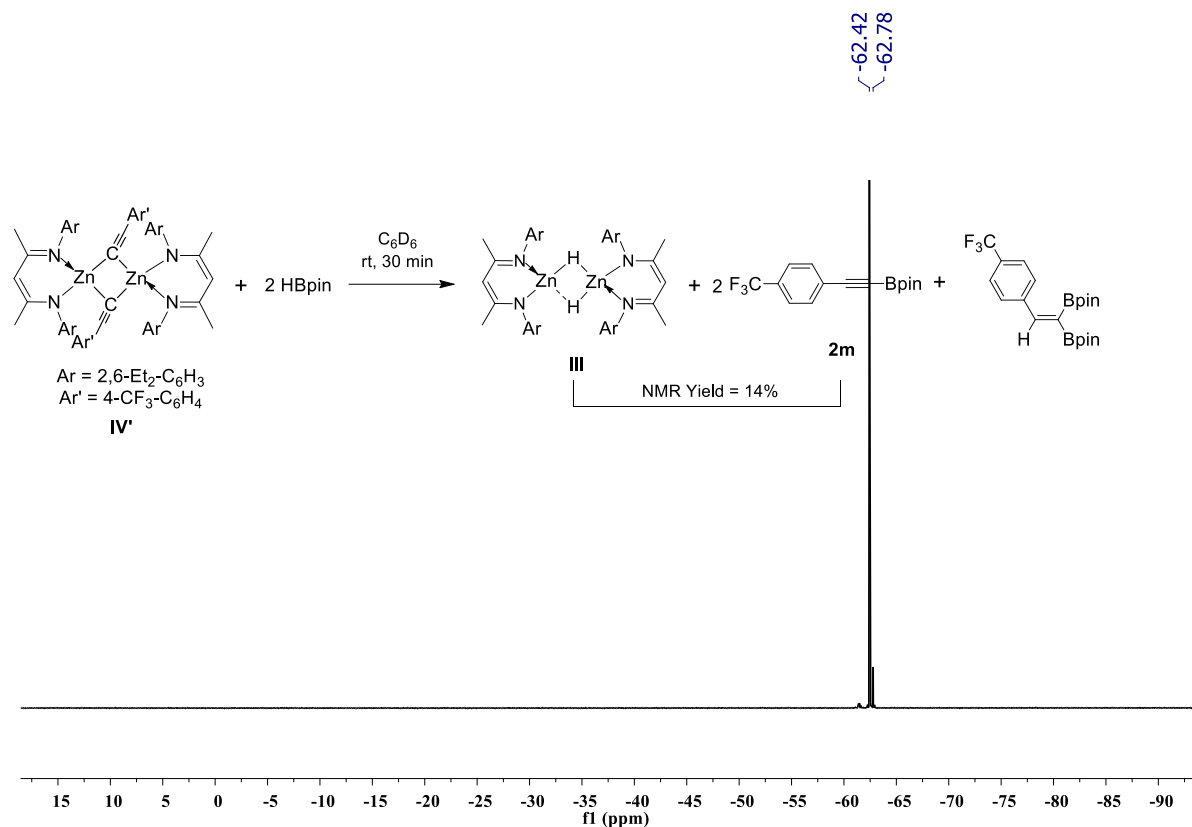

**Figure S54:**  $^{19}\text{F}\{^1\text{H}\}$  NMR (377 MHz, 25 °C,  $\text{C}_6\text{D}_6$ ) spectrum of compounds  $[\text{L}^2\text{ZnH}]_2$  & **2m**.

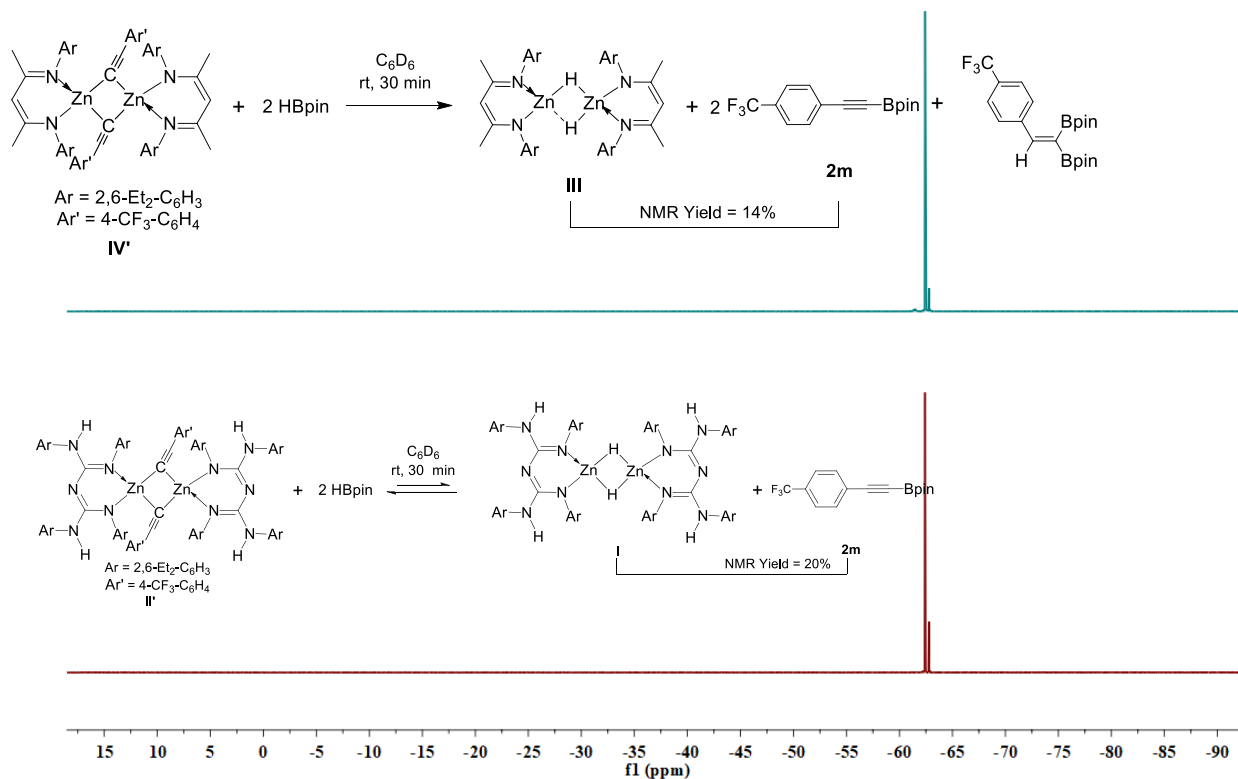

**Figure S55:**  $^{19}\text{F}\{^1\text{H}\}$  NMR (377 MHz, 25 °C,  $\text{C}_6\text{D}_6$ ) spectrum of  $[\text{L}^1\text{ZnH}]_2$  & **2m** Vs.  $[\text{L}^2\text{ZnH}]_2$  & **2m**.

# $^1\text{H}$ , $^{13}\text{C}\{^1\text{H}\}$ and $^{11}\text{B}$ NMR Spectra of Dehydrogenative Borylation of Alkynes

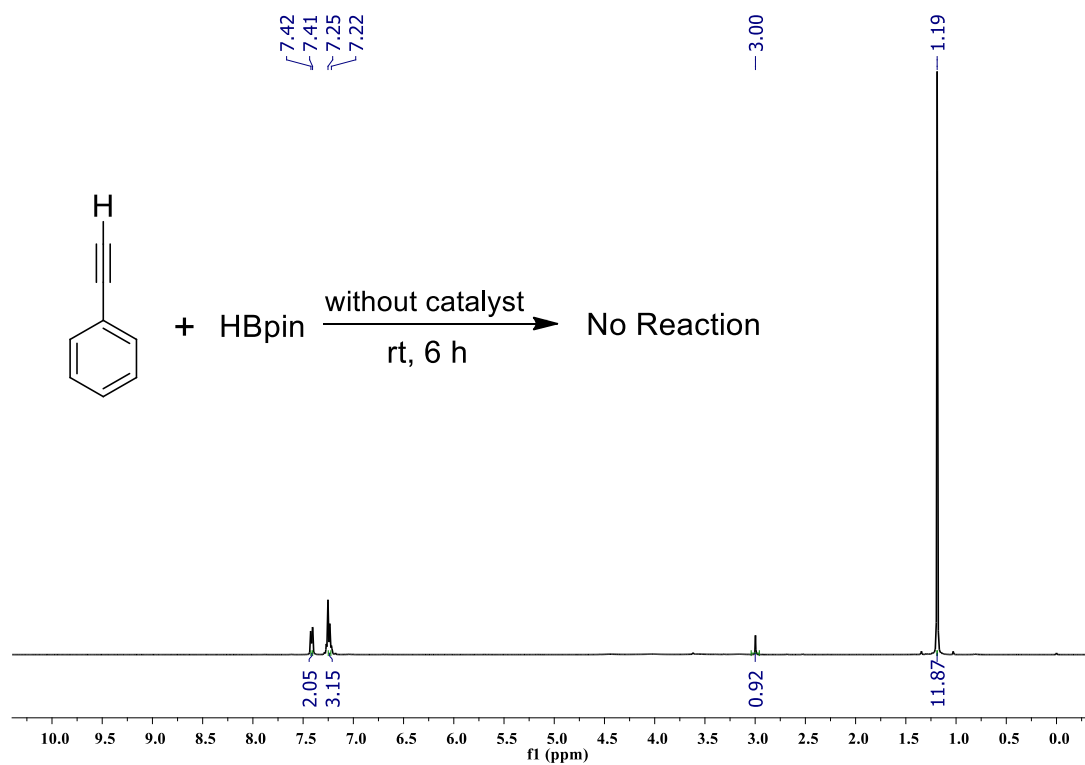

Figure S56:  $^1\text{H}$  NMR spectrum of compound **2a** (400 MHz,  $\text{CDCl}_3$ ).

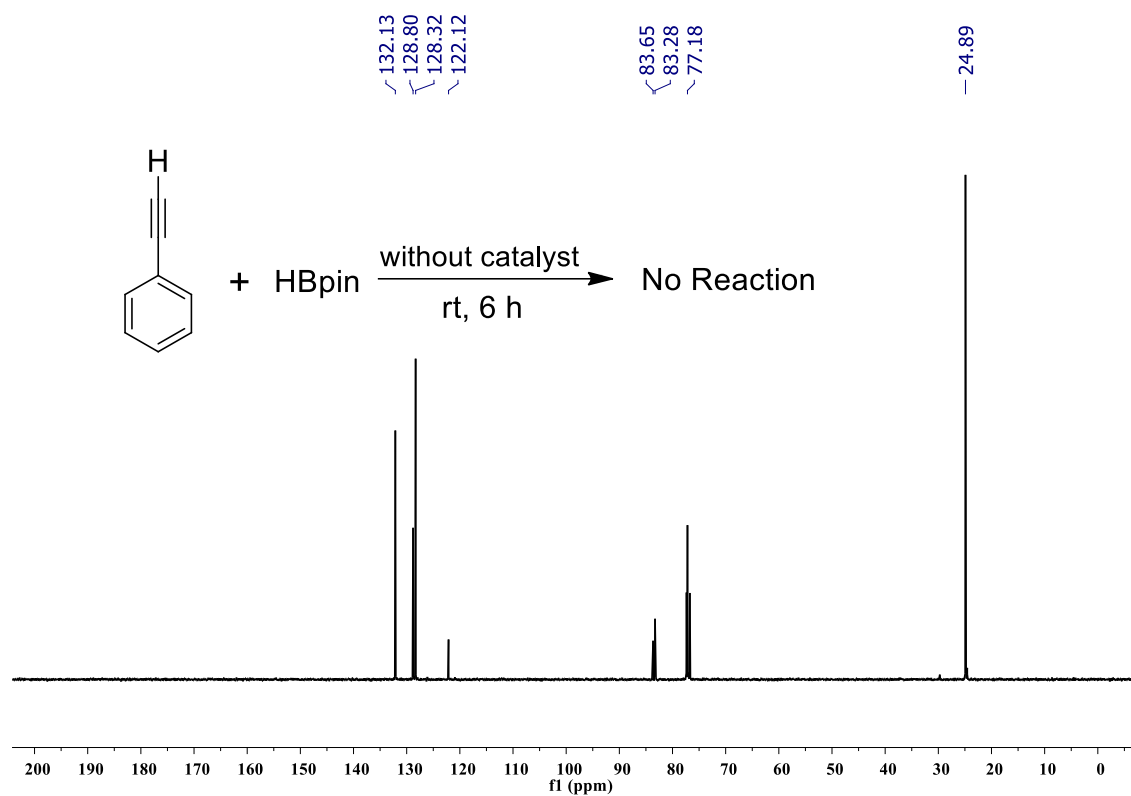

Figure S57:  $^{13}\text{C}\{^1\text{H}\}$  NMR spectrum of compound **2a** (100 MHz,  $\text{CDCl}_3$ ).

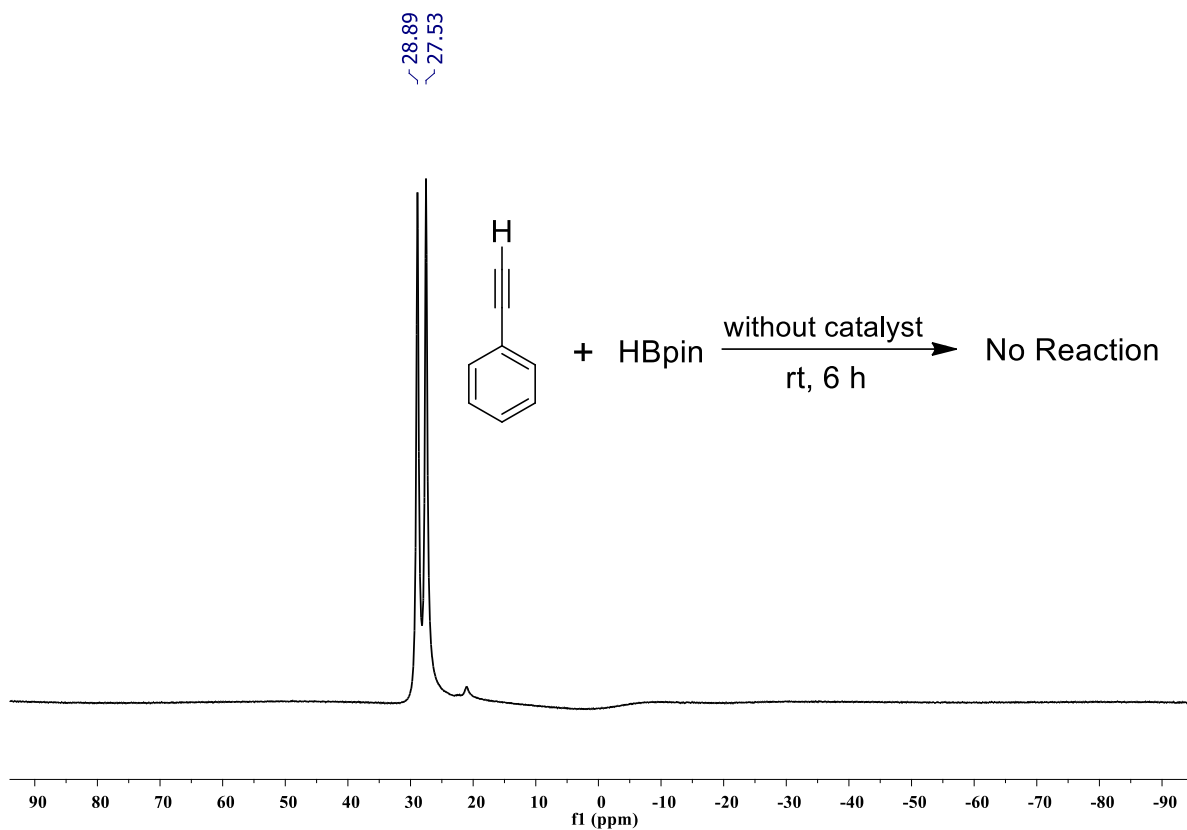

**Figure S58:**  $^{11}\text{B}$  NMR spectrum of compound **2a** (128 MHz,  $\text{CDCl}_3$ ).

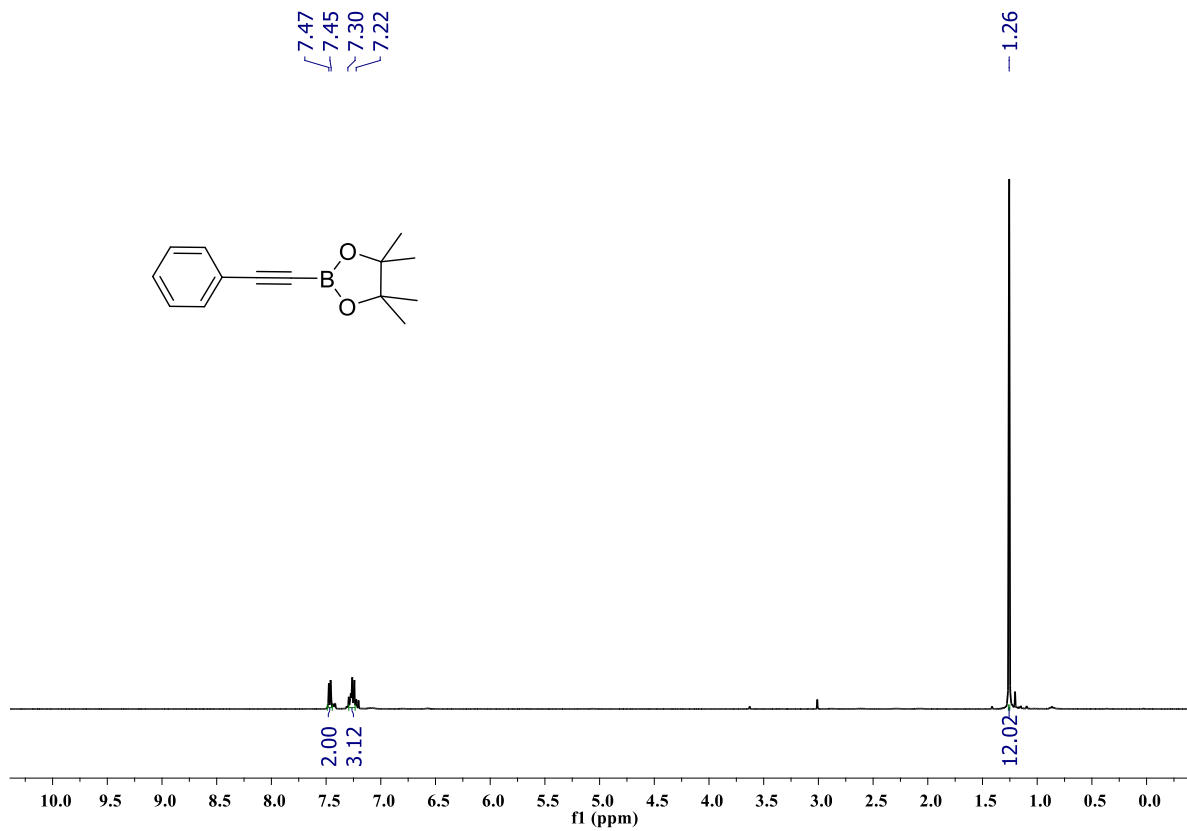

**Figure S59:**  $^1\text{H}$  NMR spectrum of compound **2a** (400 MHz,  $\text{CDCl}_3$ ).



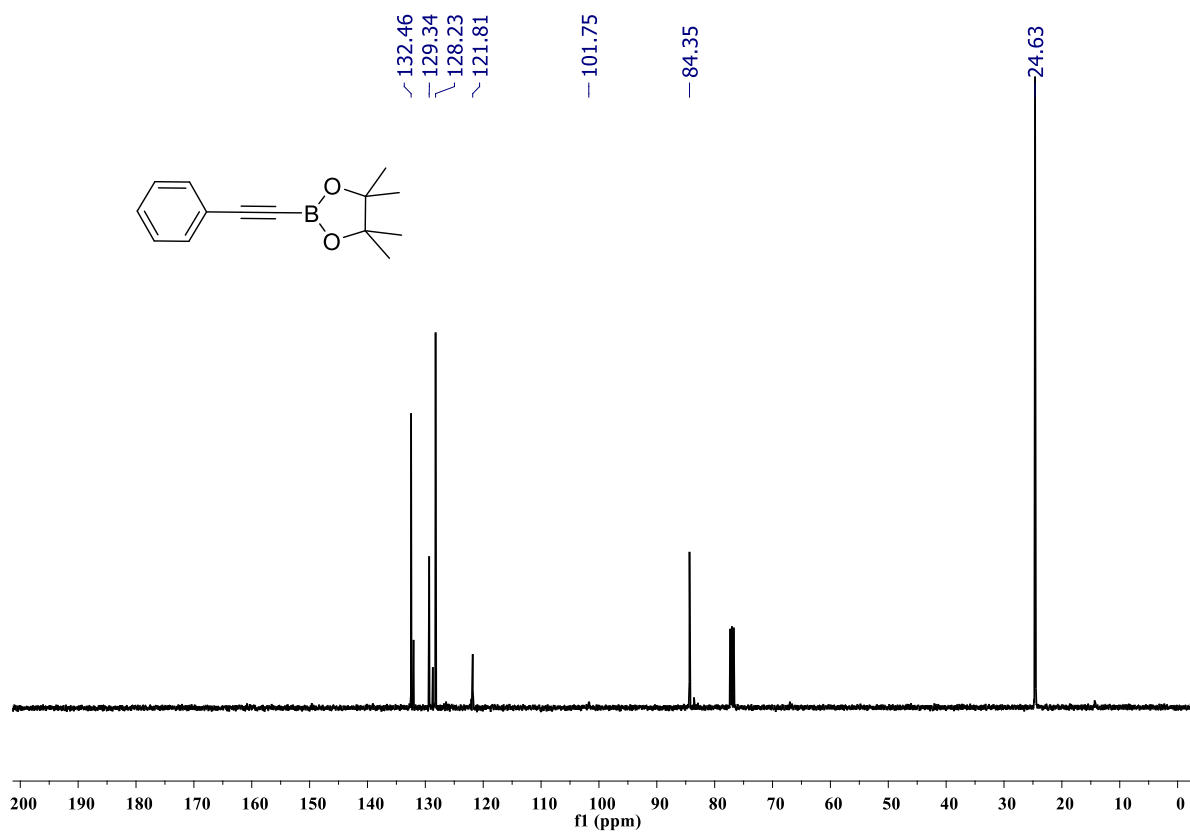

**Figure S60:**  $^{13}\text{C}\{^1\text{H}\}$  NMR spectrum of compound **2a** (100 MHz,  $\text{CDCl}_3$ ).

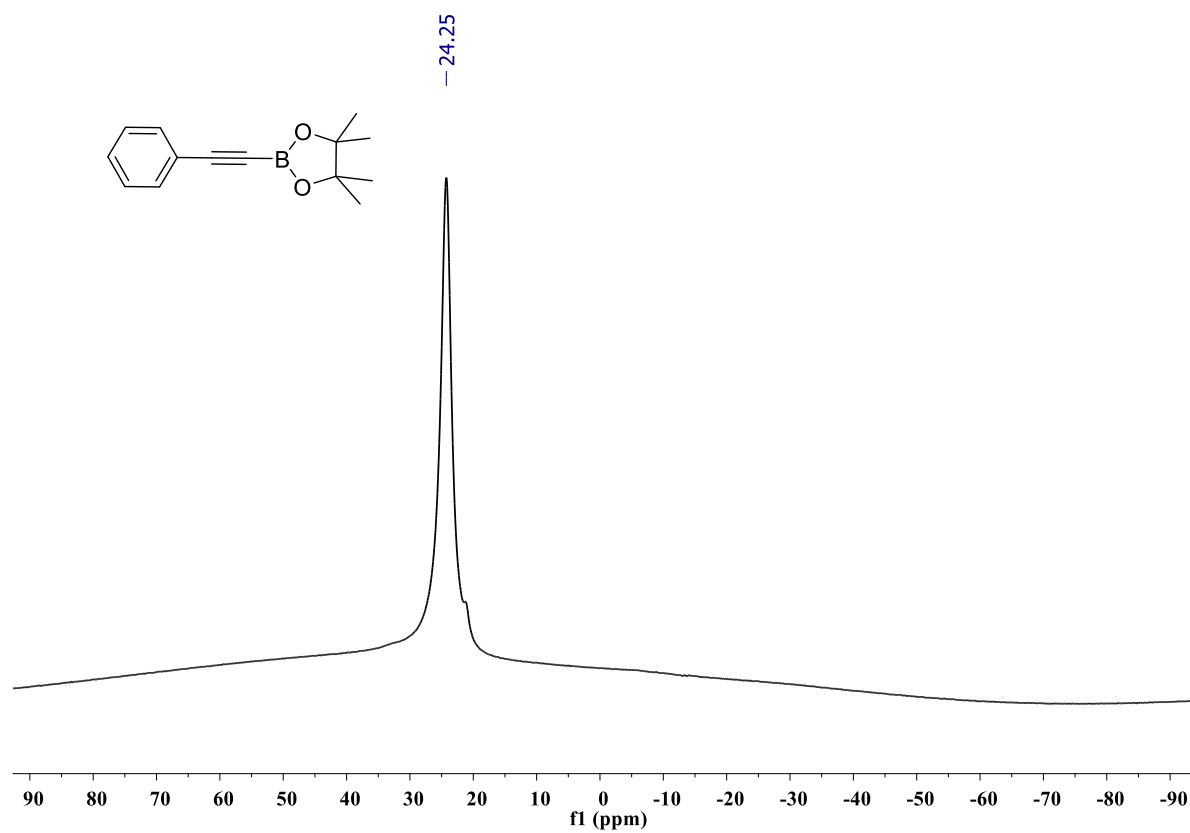

**Figure S61:**  $^{11}\text{B}$  NMR spectrum of compound **2a** (128 MHz,  $\text{CDCl}_3$ ).

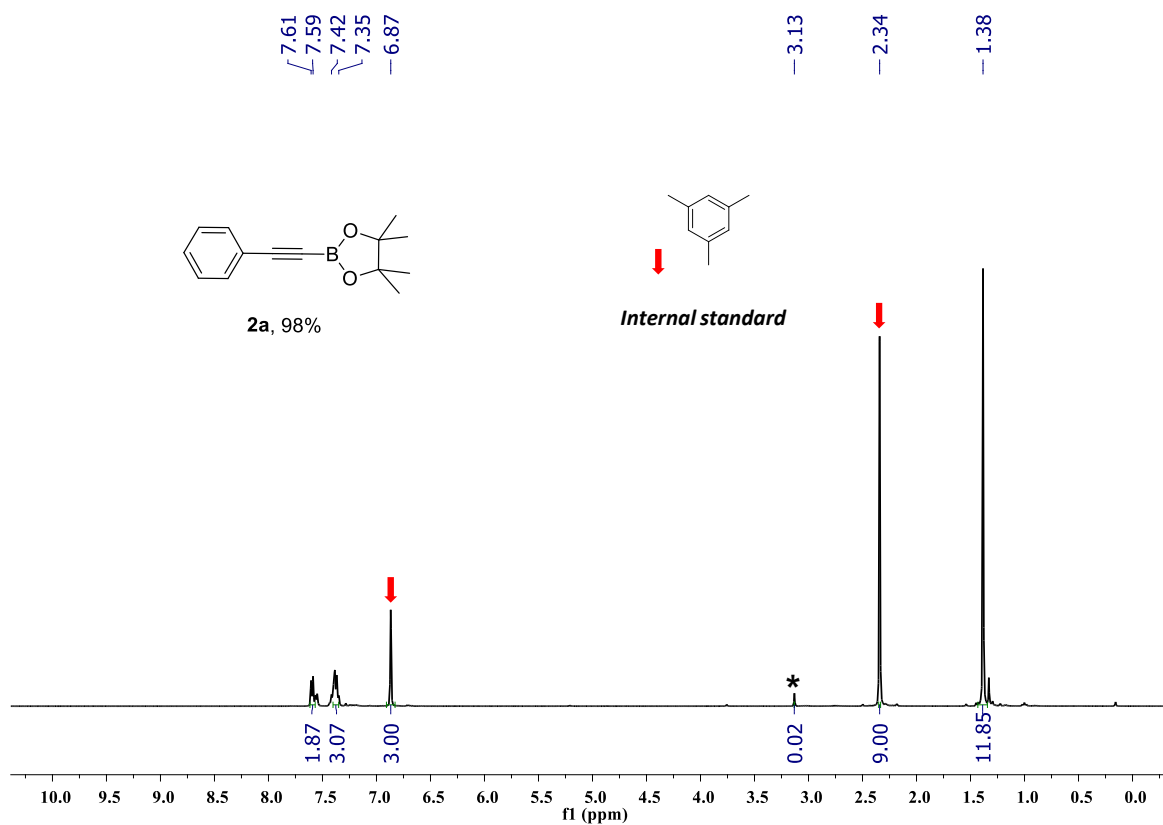

**Figure S62:** <sup>1</sup>H NMR spectrum of compound **2a** (400 MHz, CDCl<sub>3</sub>). Mesitylene was used as an internal standard. \* = unreacted compound **1a**.

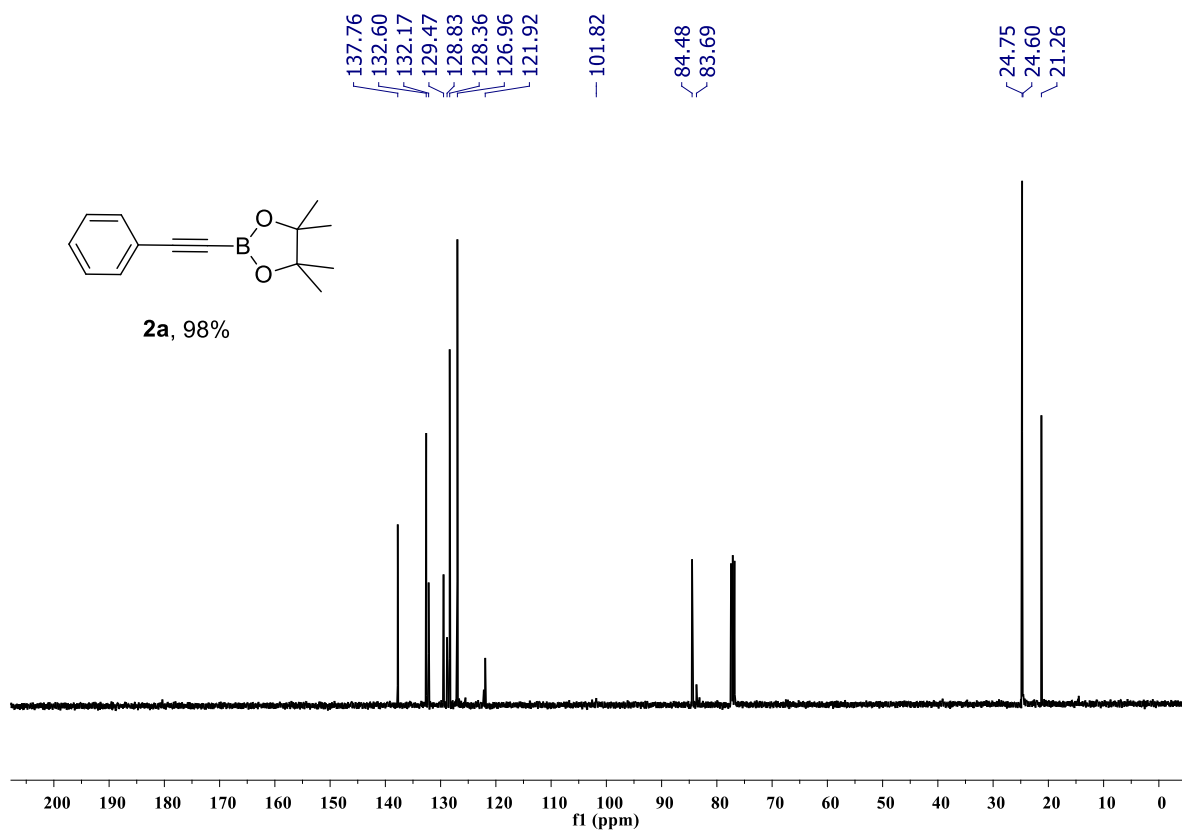

**Figure S63:** <sup>13</sup>C{<sup>1</sup>H} NMR spectrum of compound **2a** (100 MHz, CDCl<sub>3</sub>). Mesitylene was used as an internal standard.

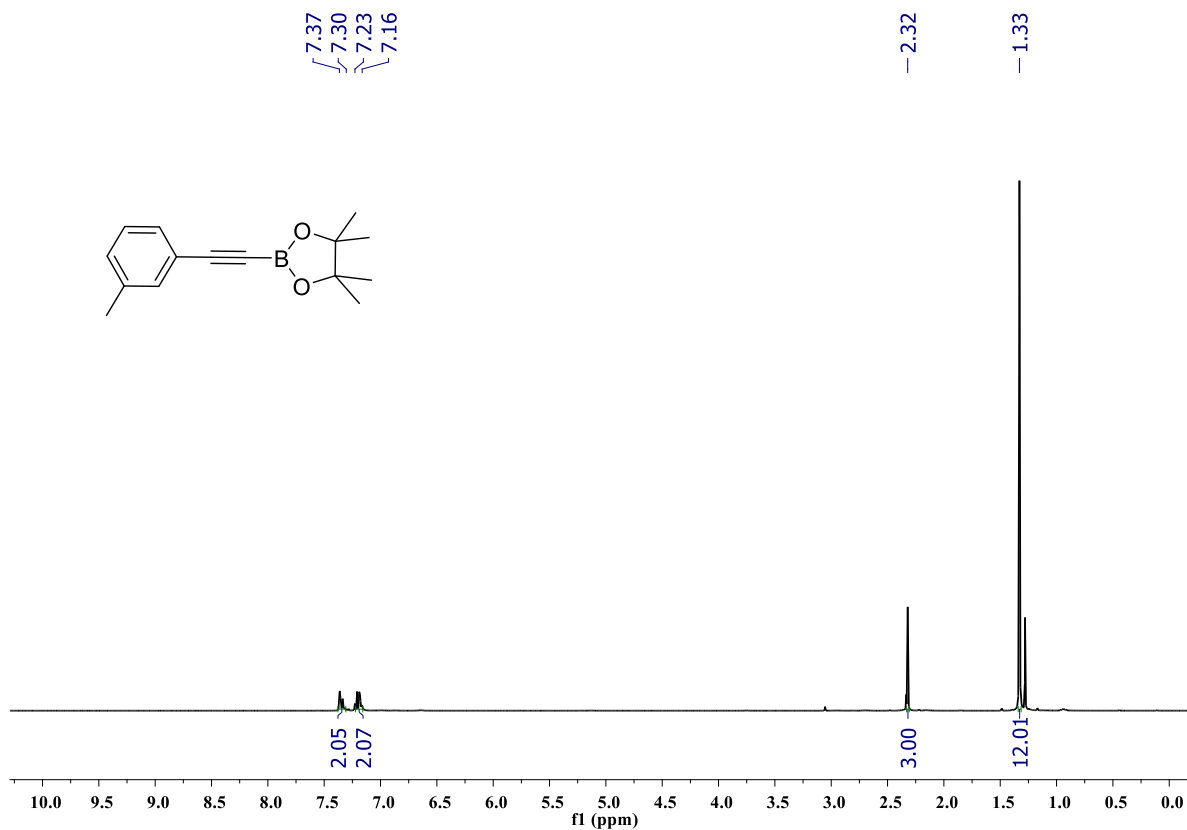

**Figure S64:**  $^1\text{H}$  NMR spectrum of compound **2b** (400 MHz,  $\text{CDCl}_3$ ).

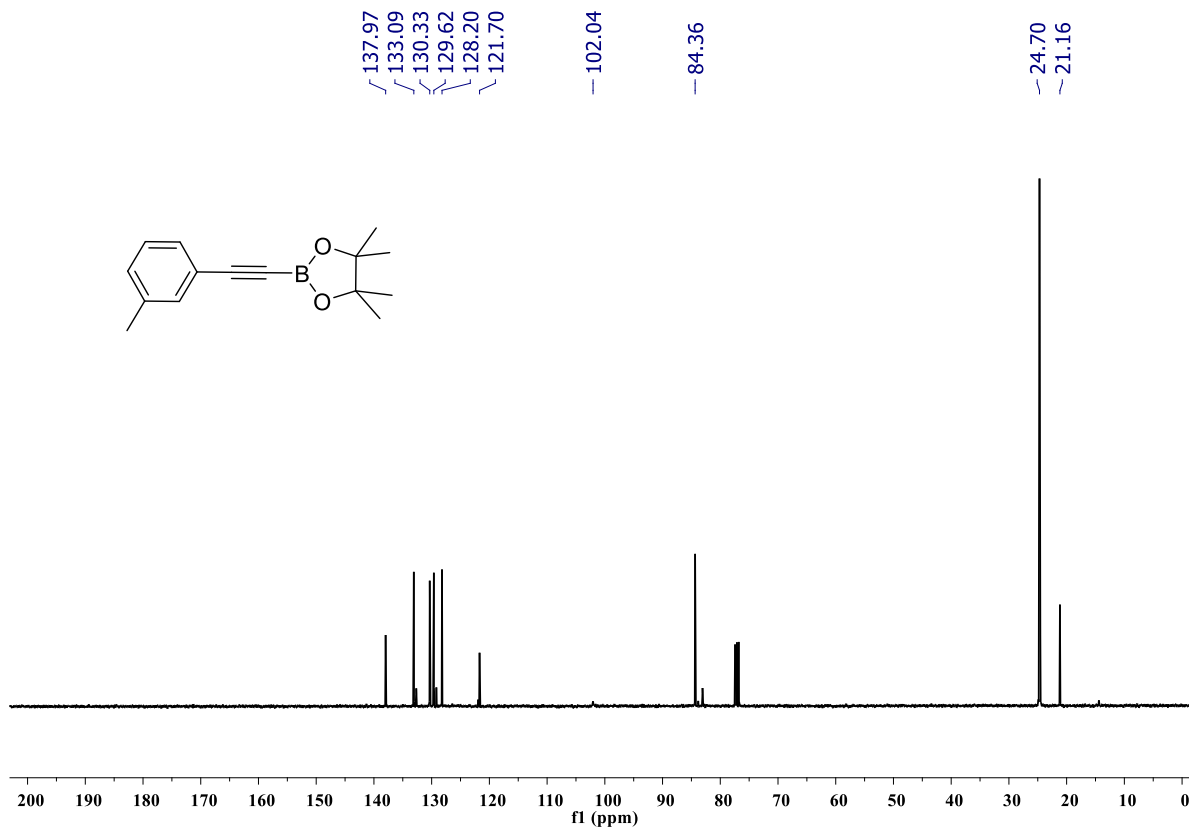

**Figure S65:**  $^{13}\text{C}\{^1\text{H}\}$  NMR spectrum of compound **2b** (100 MHz,  $\text{CDCl}_3$ ).

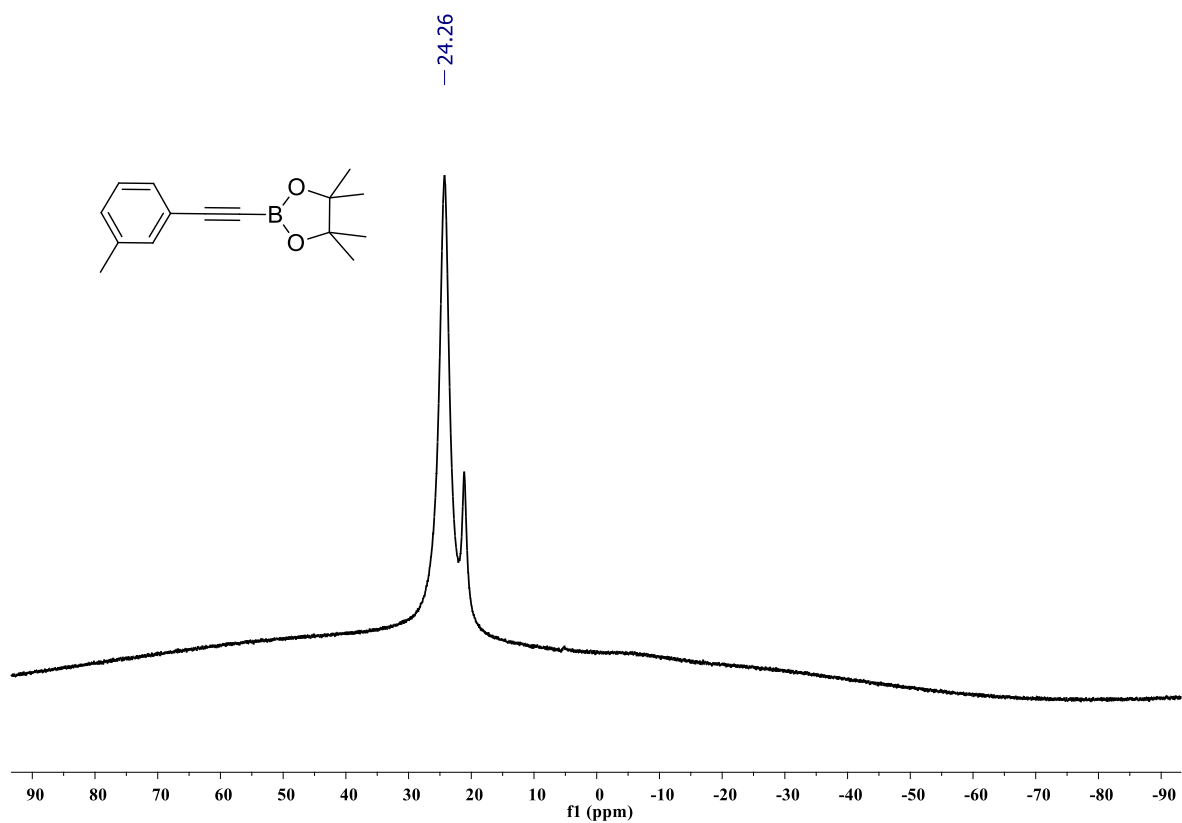

**Figure S66:**  $^{11}\text{B}$  NMR spectrum of compound **2b** (128 MHz,  $\text{CDCl}_3$ ).

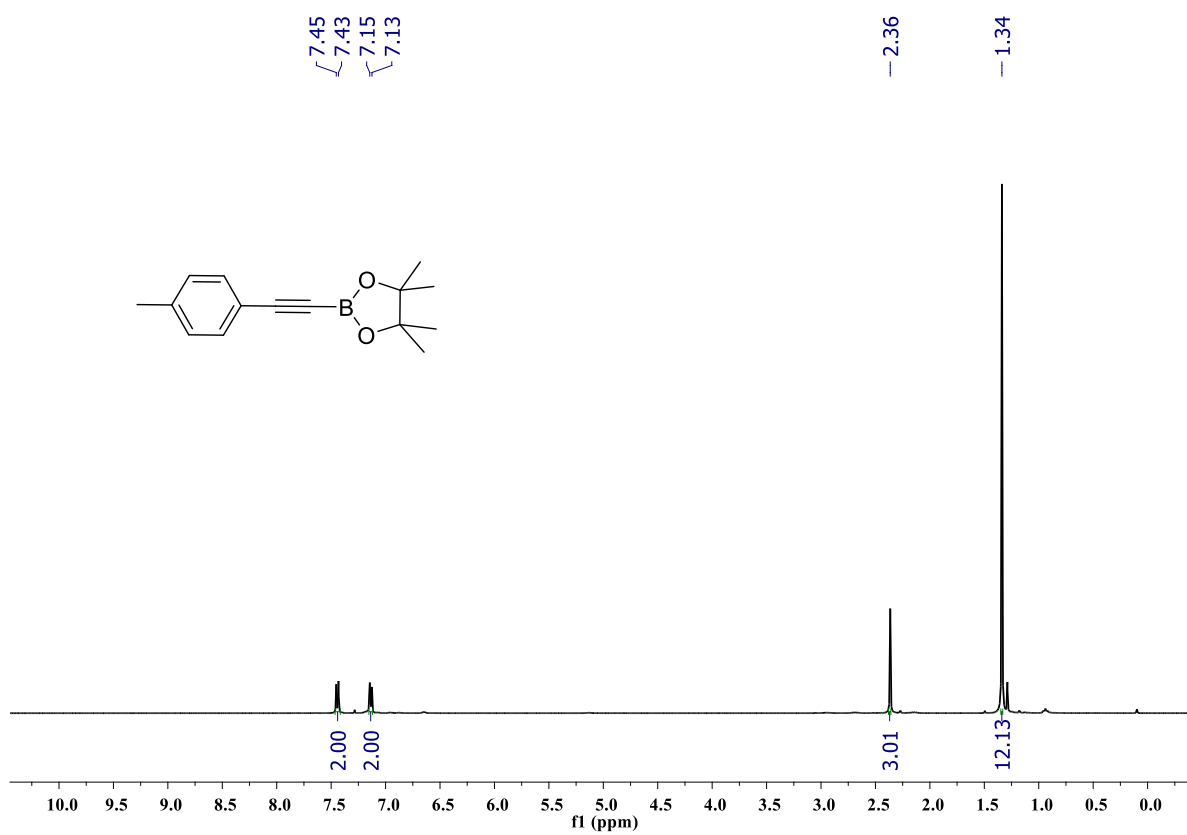

**Figure S67:**  $^1\text{H}$  NMR spectrum of compound **2c** (400 MHz,  $\text{CDCl}_3$ ).

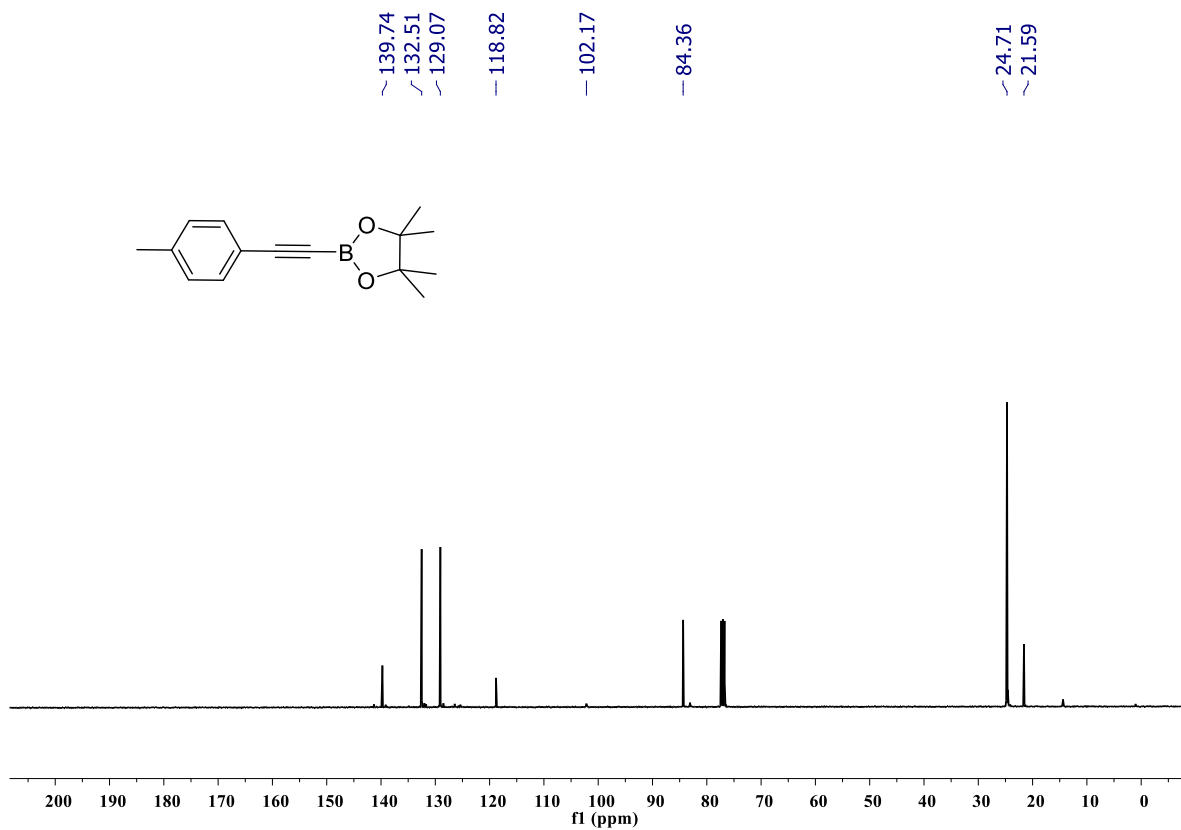

**Figure S68:**  $^{13}\text{C}\{^1\text{H}\}$  NMR spectrum of compound **2c** (100 MHz,  $\text{CDCl}_3$ ).

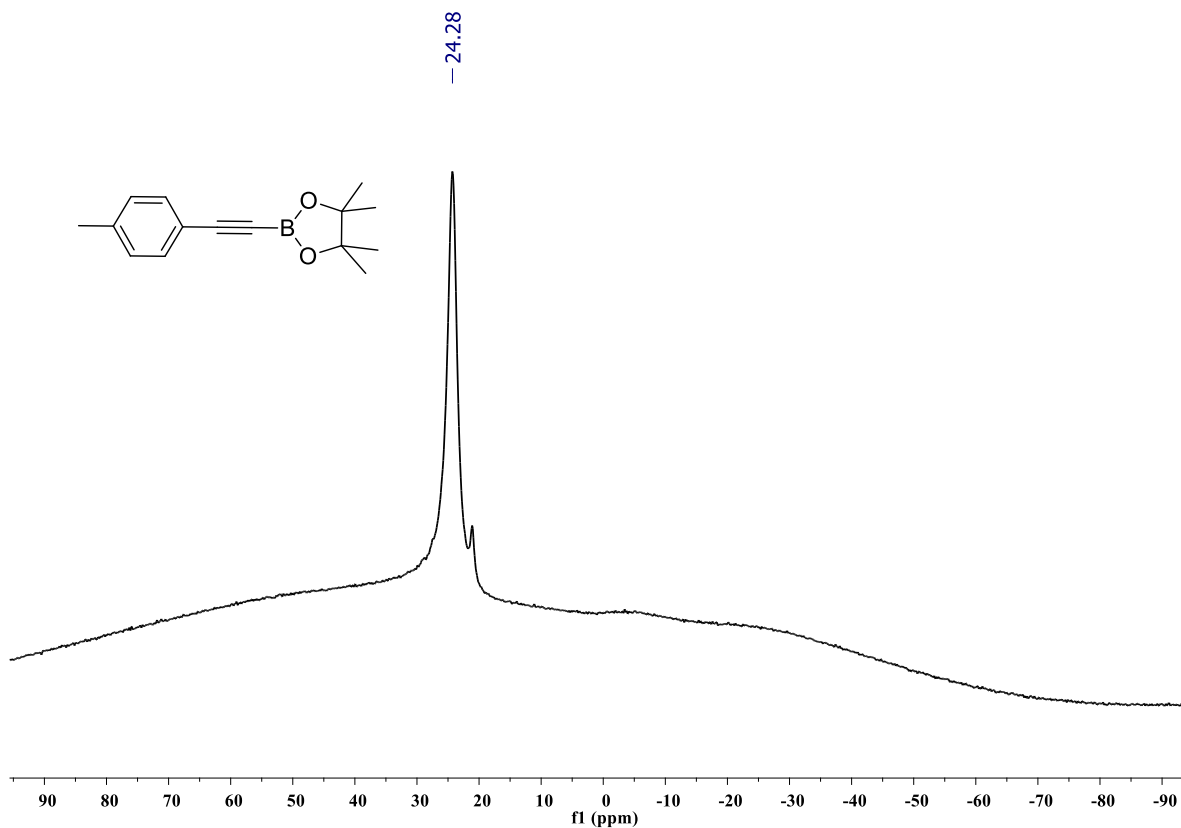

**Figure S69:**  $^{11}\text{B}$  NMR spectrum of compound **2c** (128 MHz,  $\text{CDCl}_3$ ).

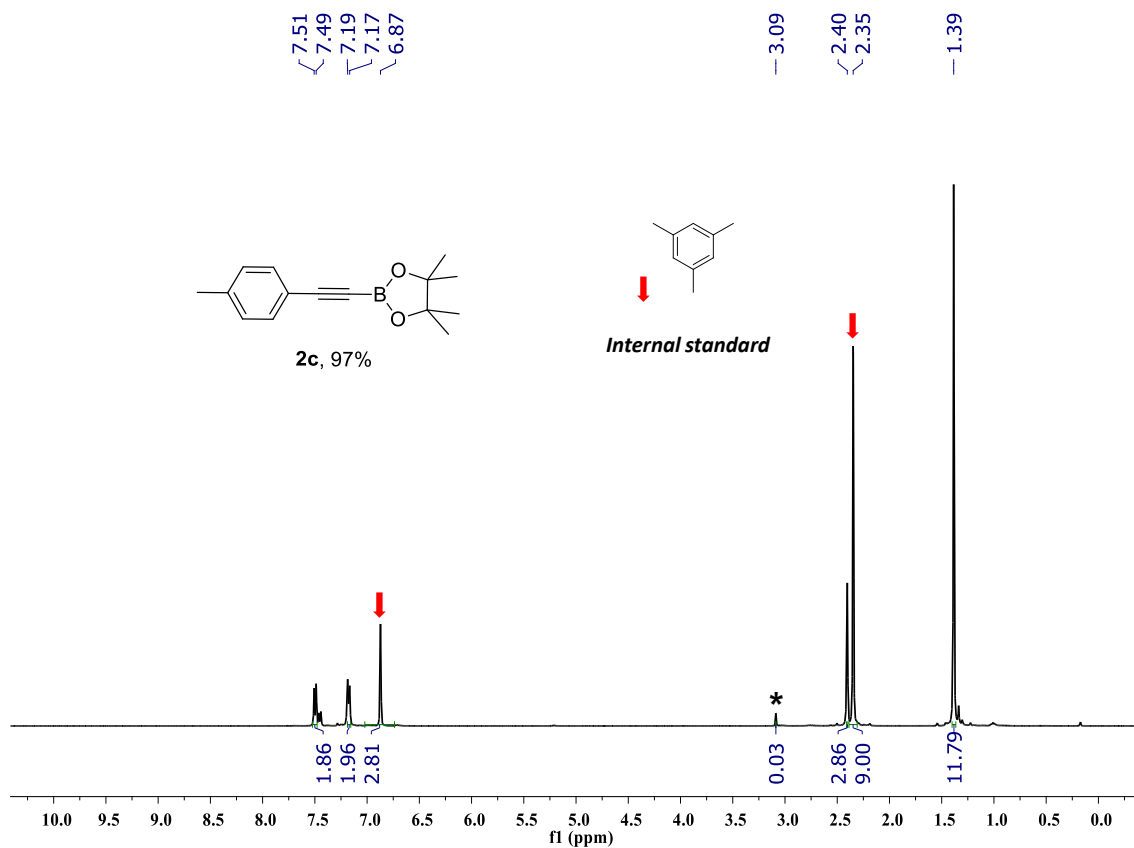

**Figure S70:**  $^1\text{H}$  NMR spectrum of compound **2c** (400 MHz,  $\text{CDCl}_3$ ). Mesitylene was used as an internal standard. \* = unreacted compound **1c**.

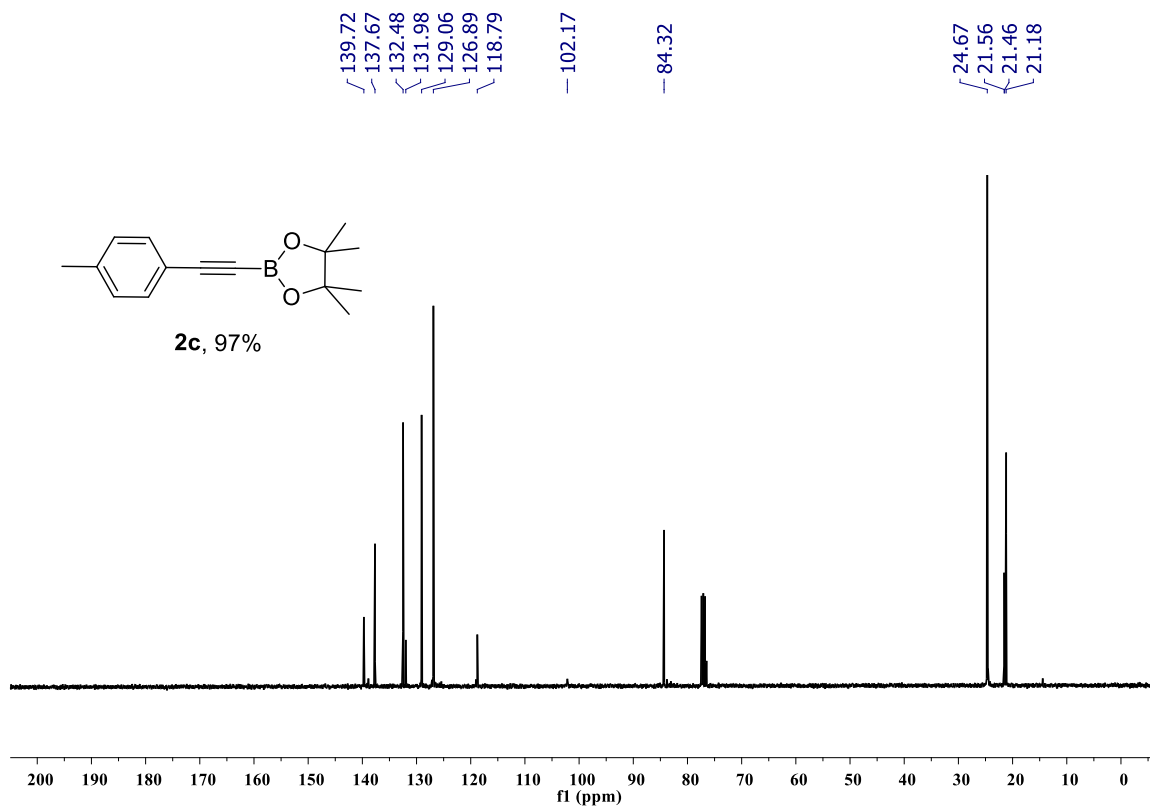

**Figure S71:**  $^{13}\text{C}\{^1\text{H}\}$  NMR spectrum of compound **2c** (100 MHz,  $\text{CDCl}_3$ ). Mesitylene was used as an internal standard.

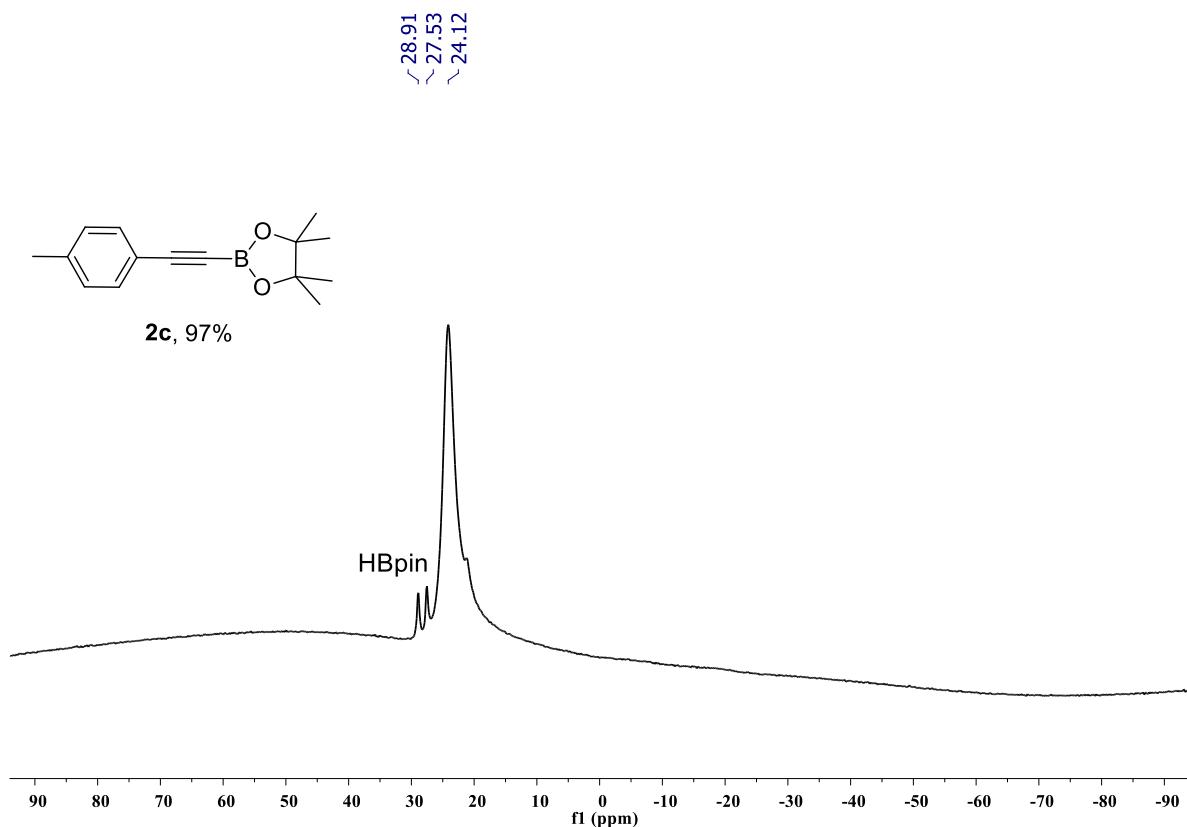

**Figure S72:**  $^{11}\text{B}$  NMR spectrum of compound **2c** (128 MHz,  $\text{CDCl}_3$ ). Mesitylene was used as an internal standard.

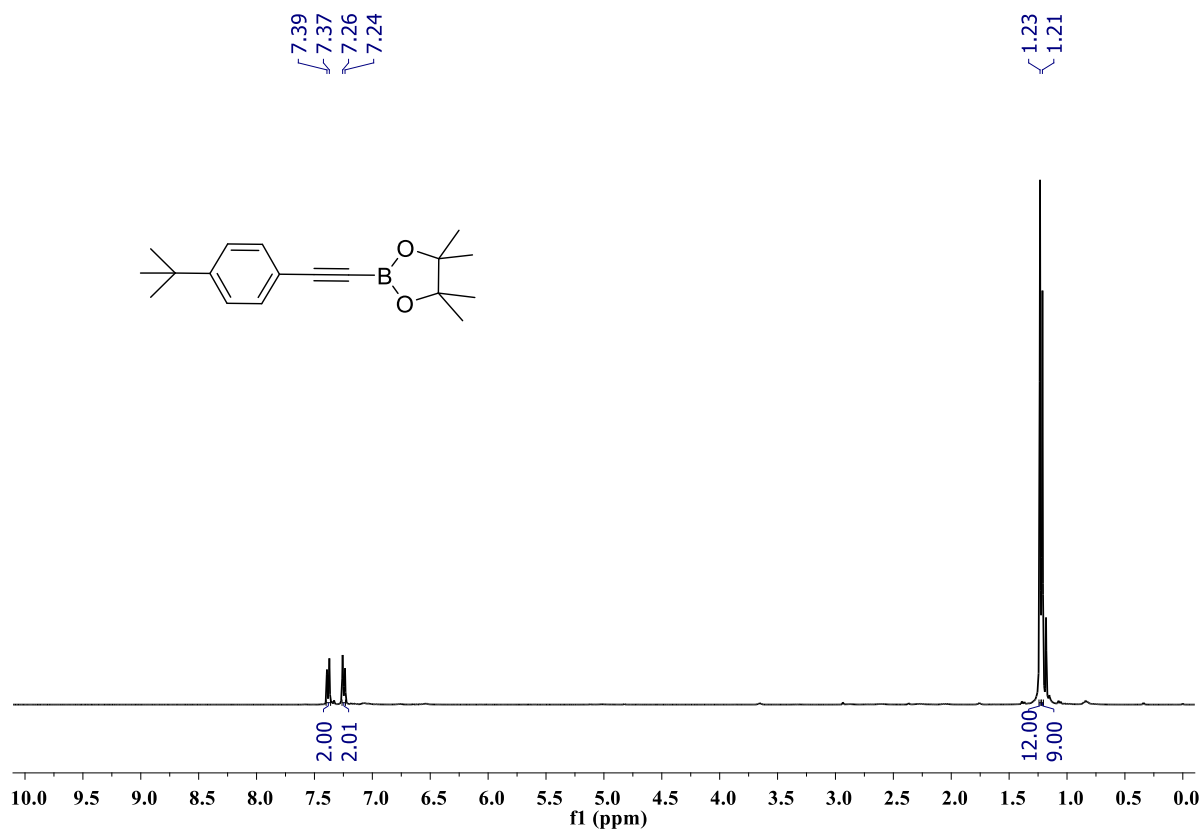

**Figure S73:**  $^1\text{H}$  NMR spectrum of compound **2d** (400 MHz,  $\text{CDCl}_3$ ).

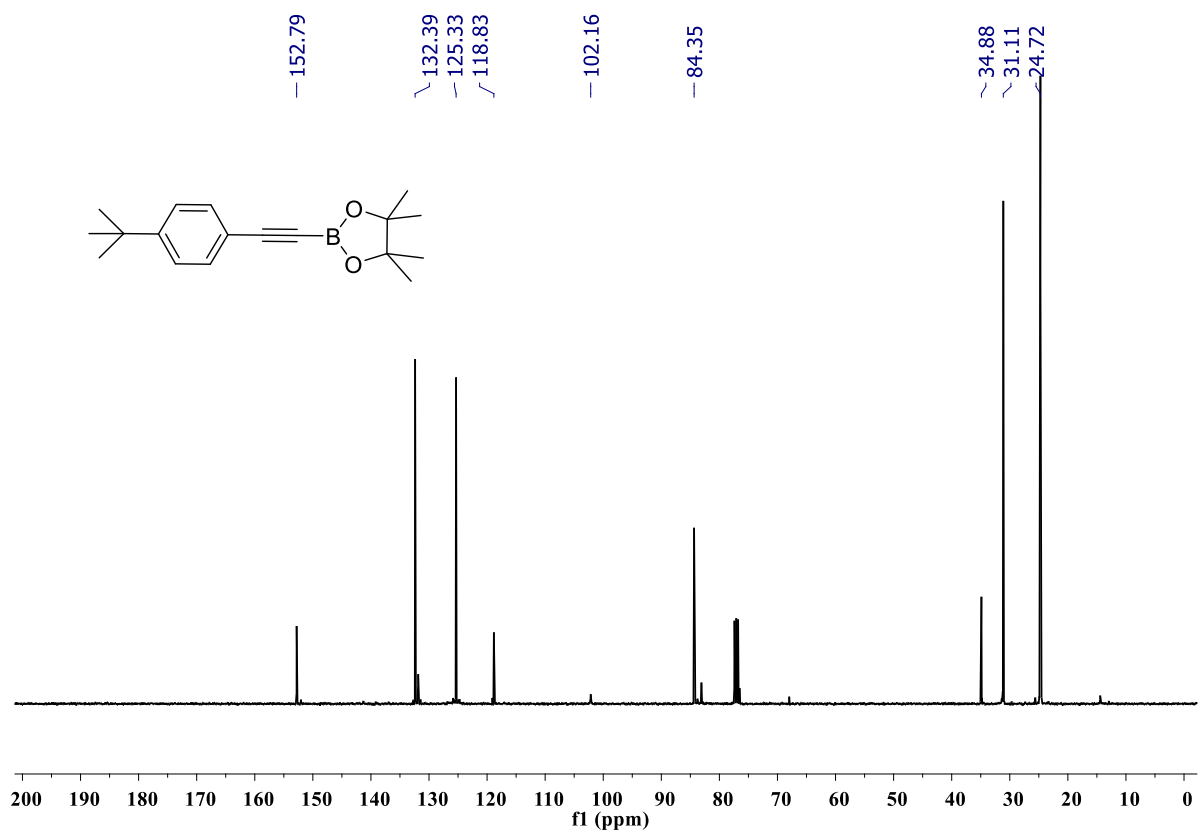

**Figure S74:**  $^{13}\text{C}\{^1\text{H}\}$  NMR spectrum of compound **2d** (100 MHz,  $\text{CDCl}_3$ ).

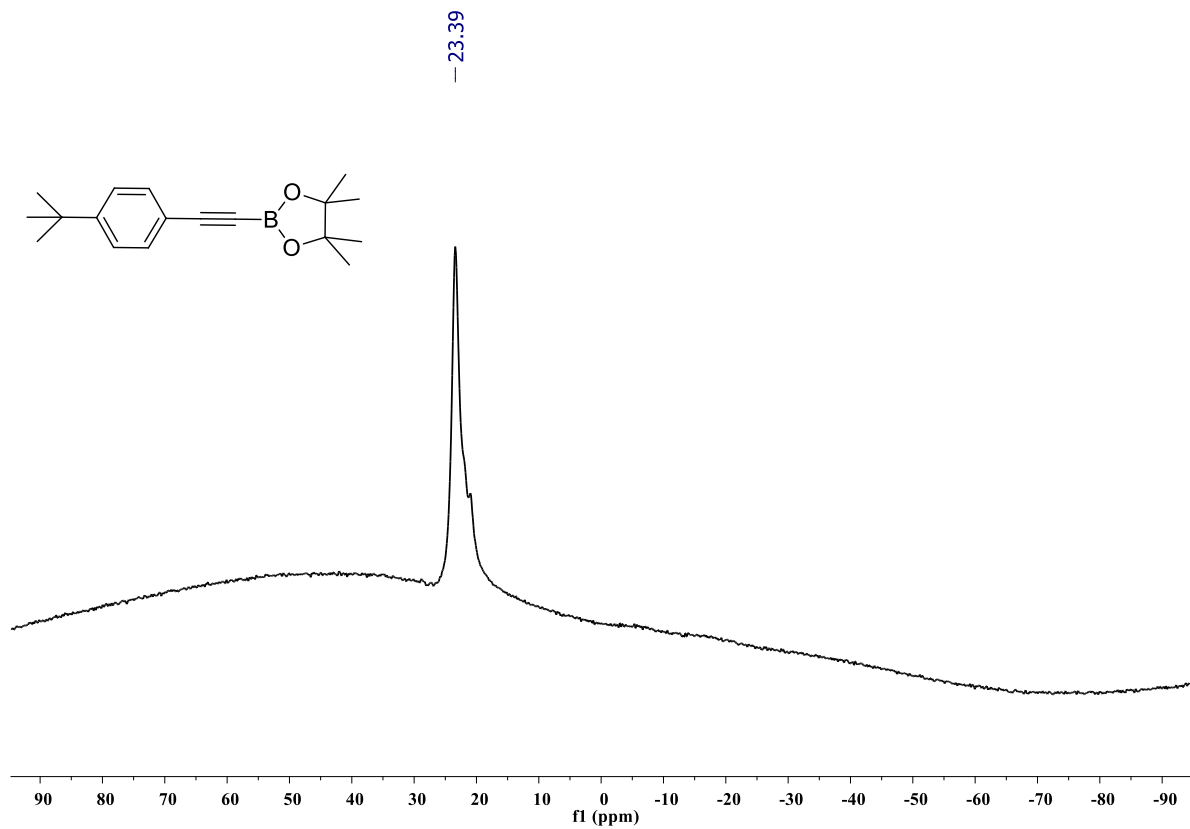

**Figure S75:**  $^{11}\text{B}$  NMR spectrum of compound **2d** (128 MHz,  $\text{CDCl}_3$ ).



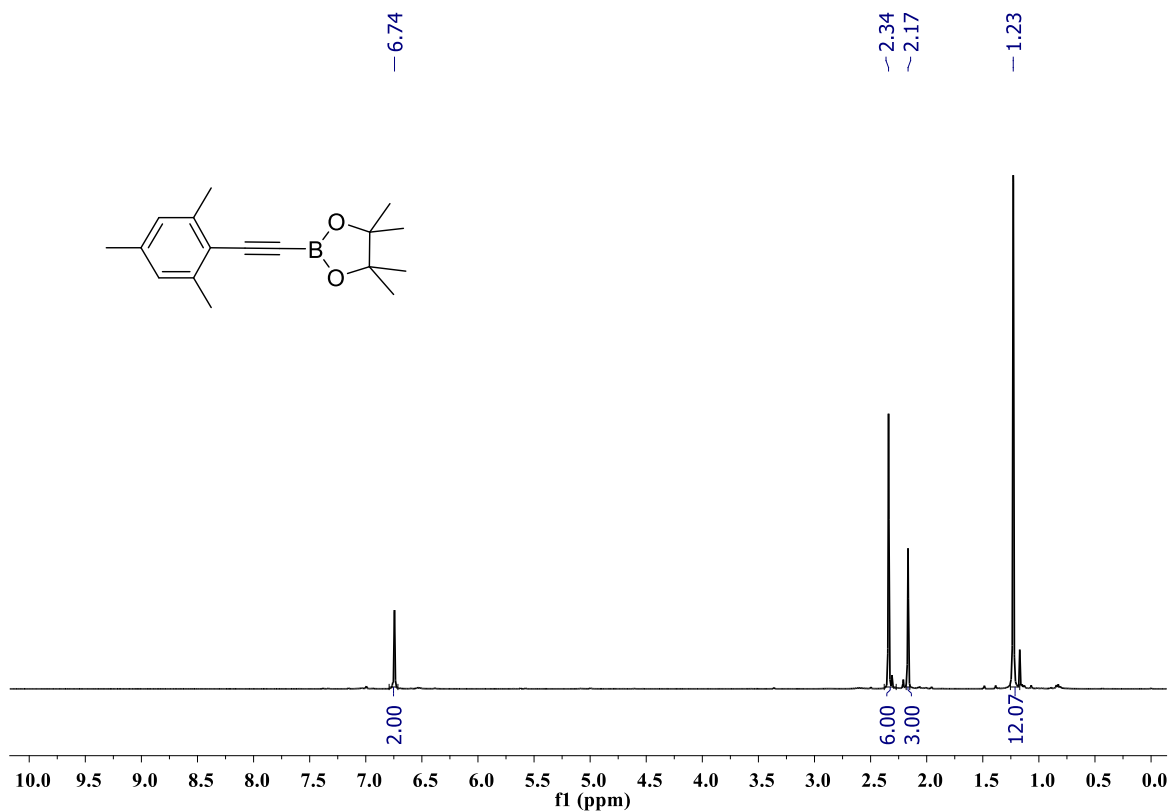

**Figure S76:**  $^1\text{H}$  NMR spectrum of compound **2e** (400 MHz,  $\text{CDCl}_3$ ).

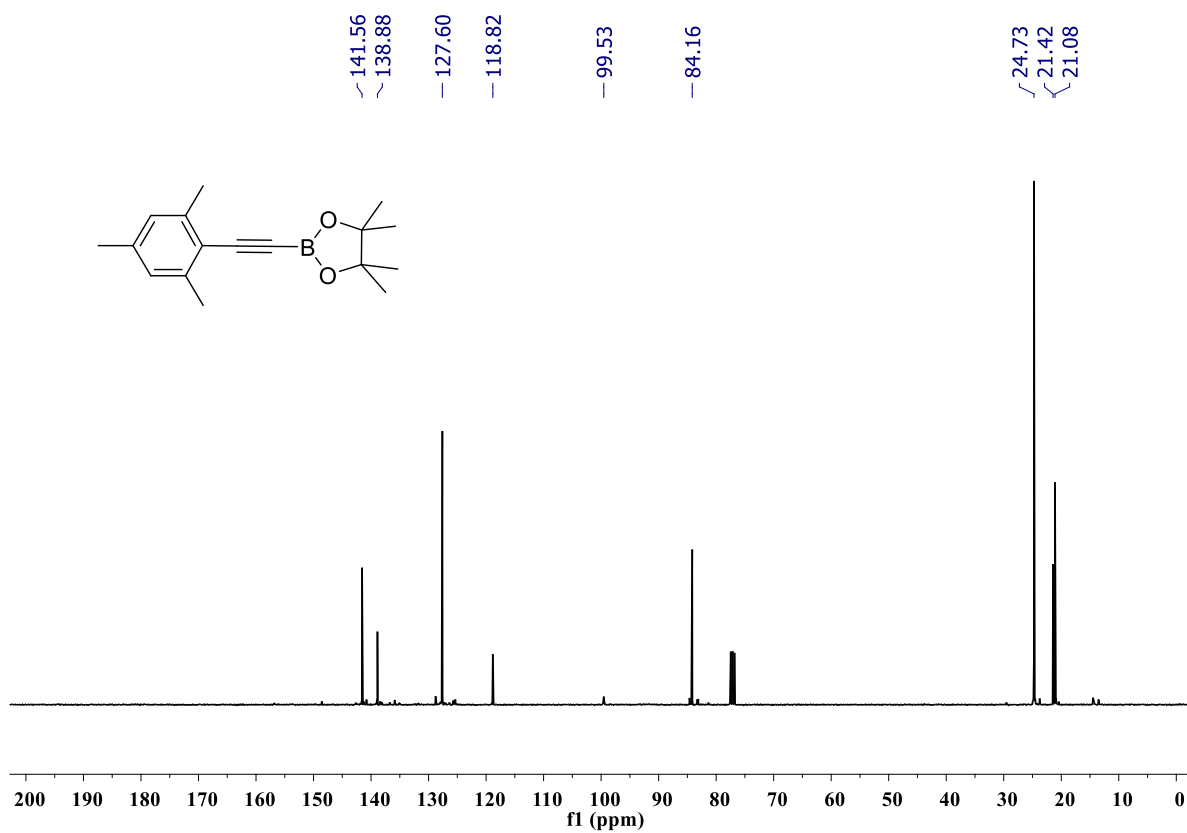

**Figure S77:**  $^{13}\text{C}\{^1\text{H}\}$  NMR spectrum of compound **2e** (100 MHz,  $\text{CDCl}_3$ ).

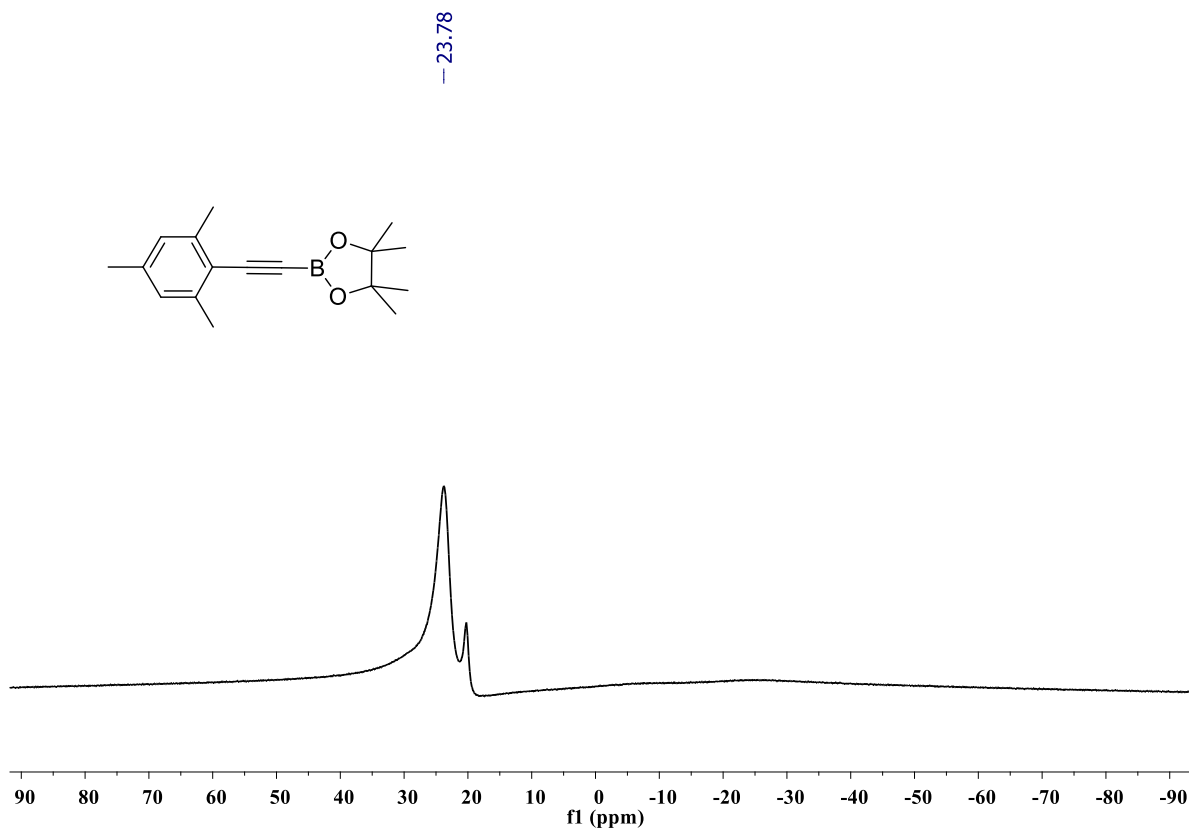

**Figure S78:**  $^{11}\text{B}$  NMR spectrum of compound **2e** (128 MHz,  $\text{CDCl}_3$ ).

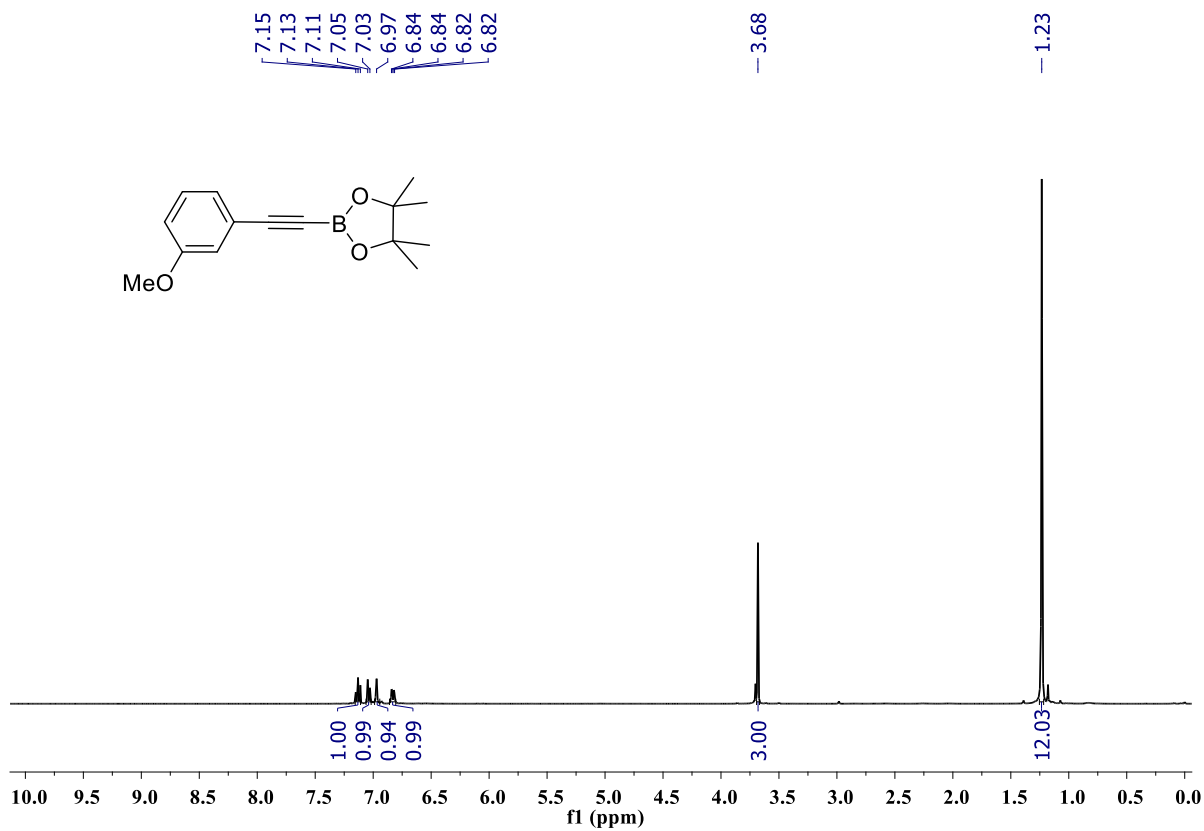

**Figure S79:**  $^1\text{H}$  NMR spectrum of compound **2f** (400 MHz,  $\text{CDCl}_3$ ).

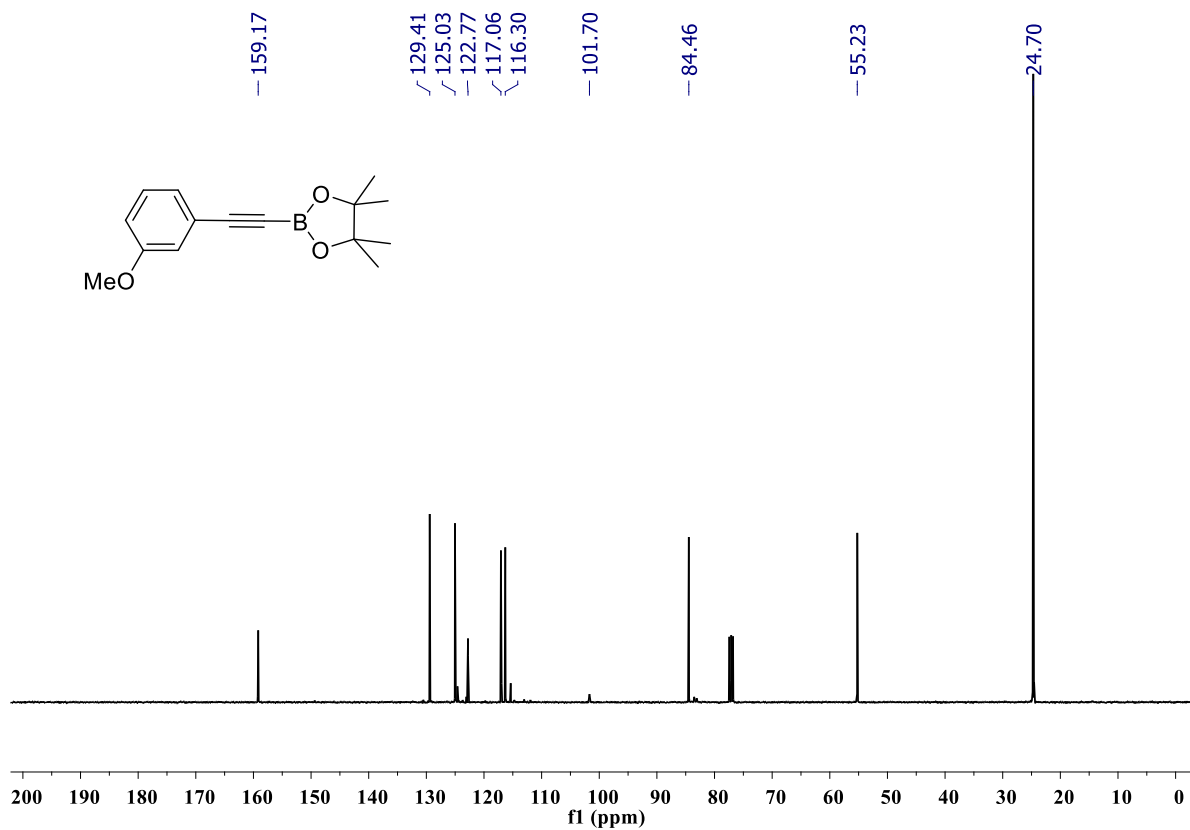

**Figure S80:**  $^{13}\text{C}\{^1\text{H}\}$  NMR spectrum of compound **2f** (100 MHz,  $\text{CDCl}_3$ ).

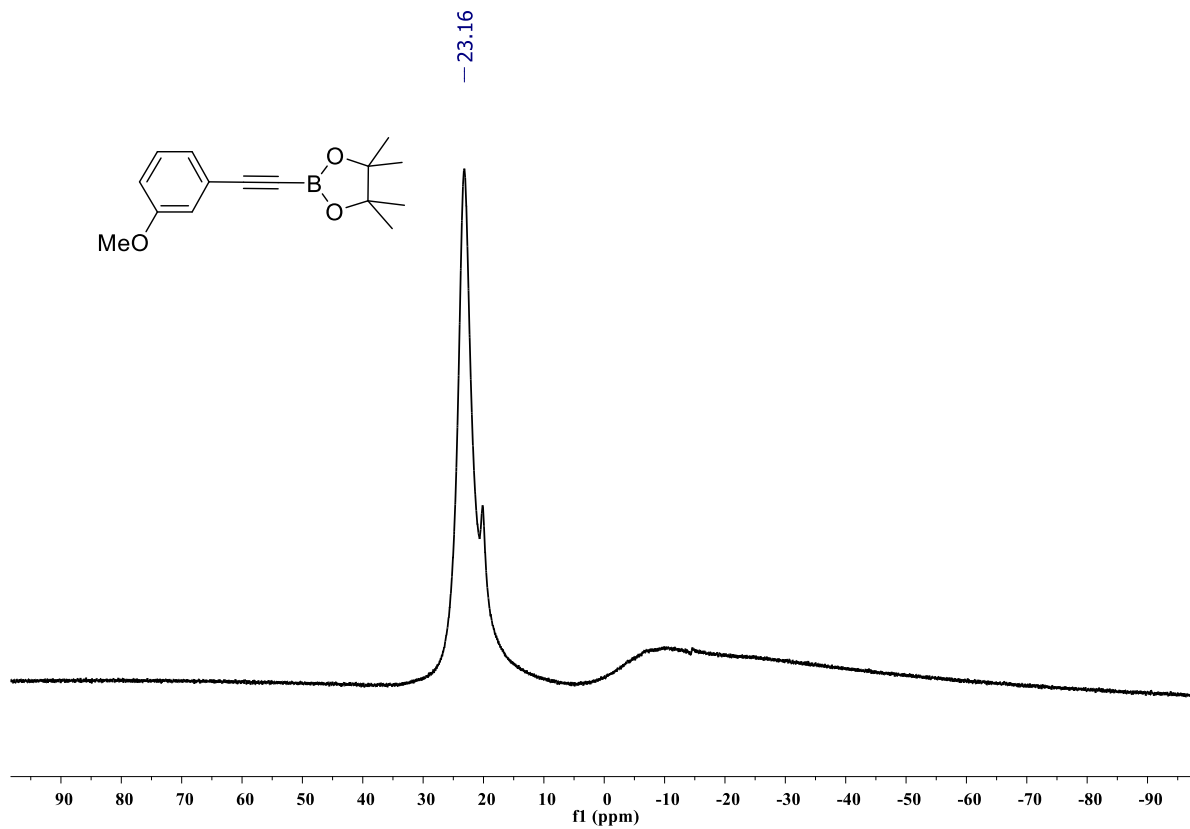

**Figure S81:**  $^{11}\text{B}$  NMR spectrum of compound **2f** (128 MHz,  $\text{CDCl}_3$ ).

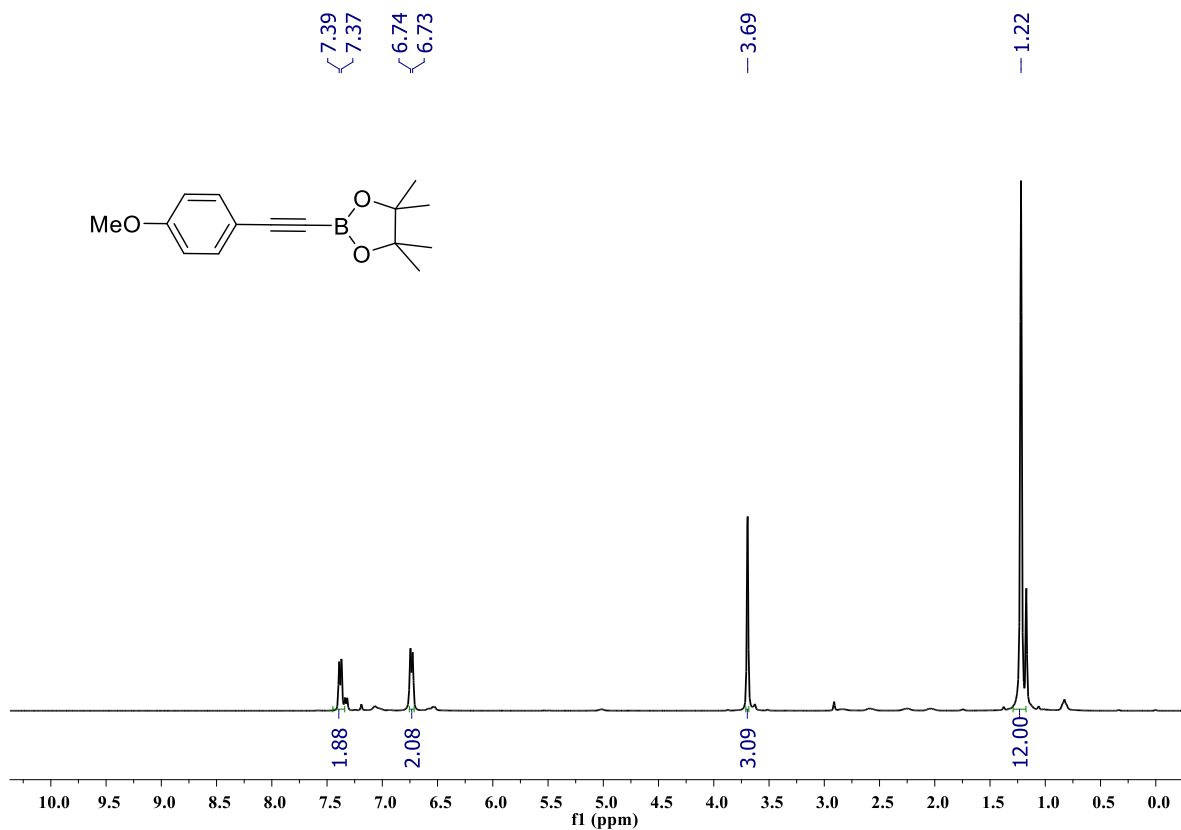

**Figure S82:**  $^1\text{H}$  NMR spectrum of compound **2g** (400 MHz,  $\text{CDCl}_3$ ).

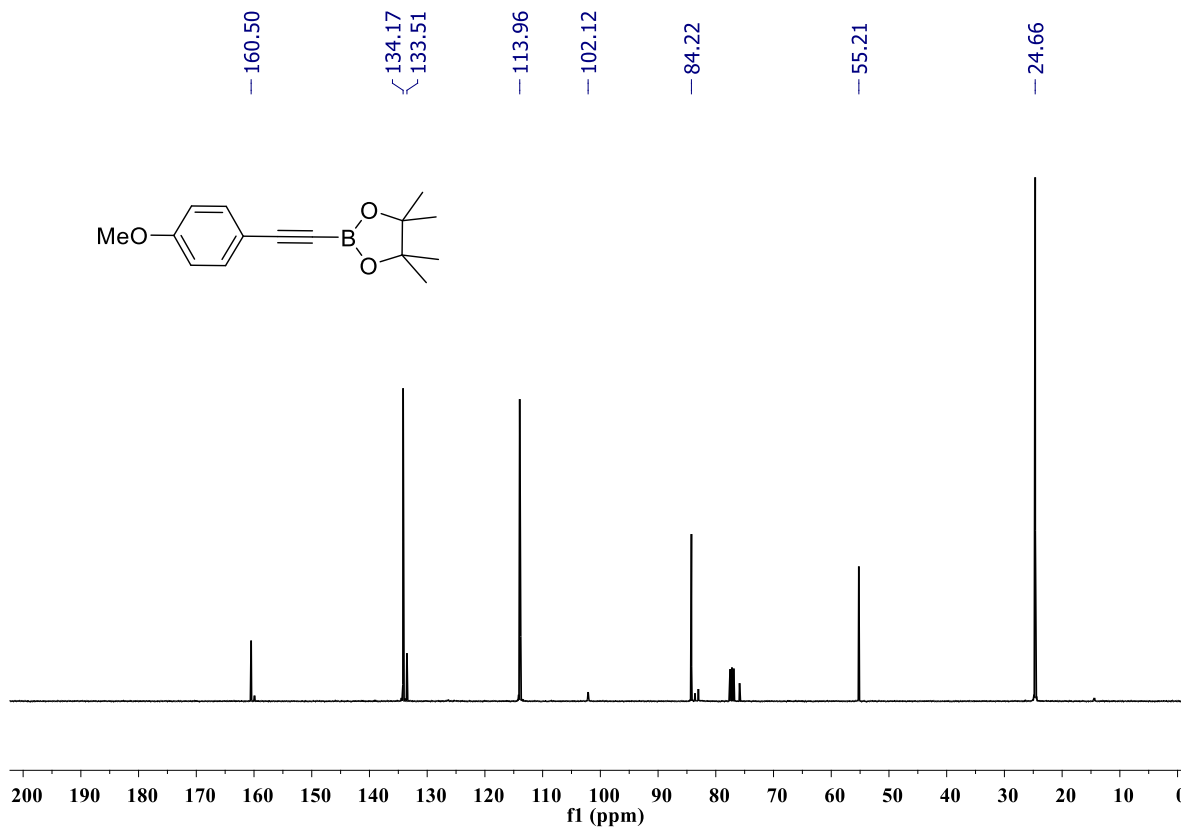

**Figure S83:**  $^{13}\text{C}\{^1\text{H}\}$  NMR spectrum of compound **2g** (100 MHz,  $\text{CDCl}_3$ ).

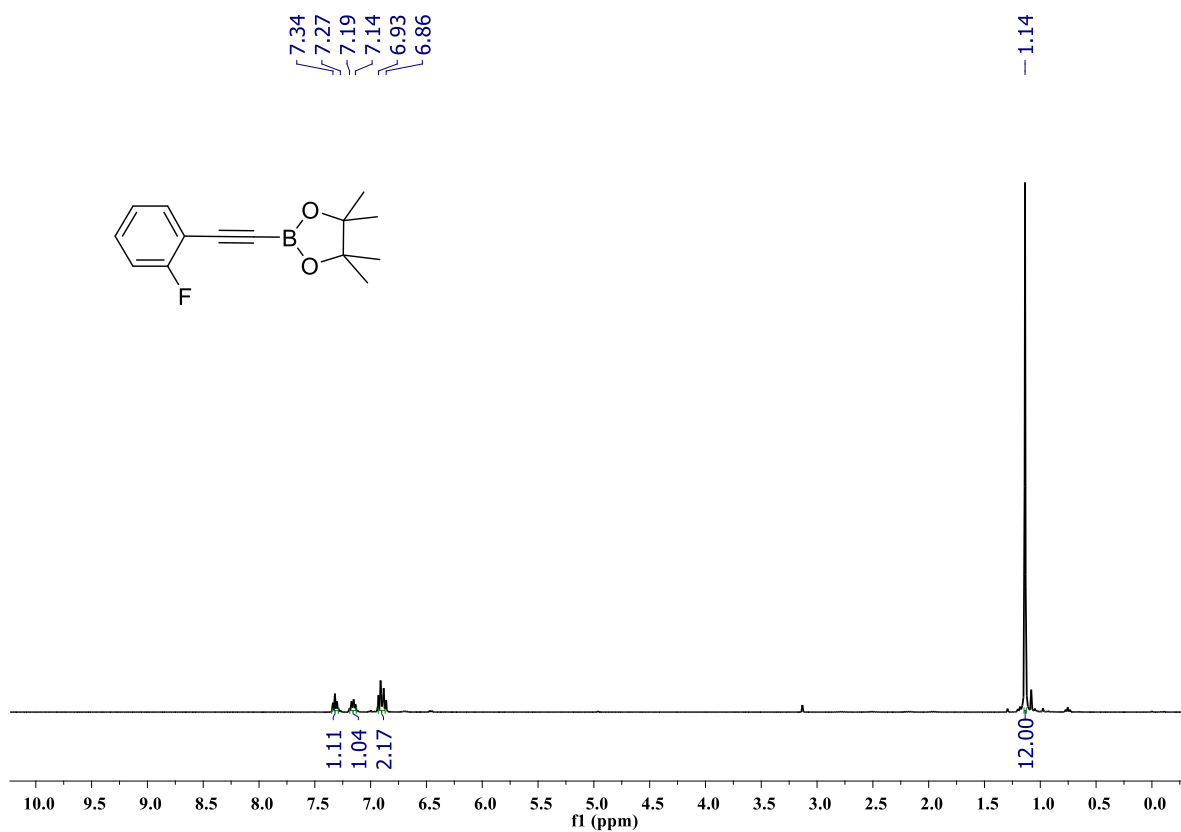

**Figure S84:** <sup>1</sup>H NMR spectrum of compound **2h** (400 MHz, CDCl<sub>3</sub>).

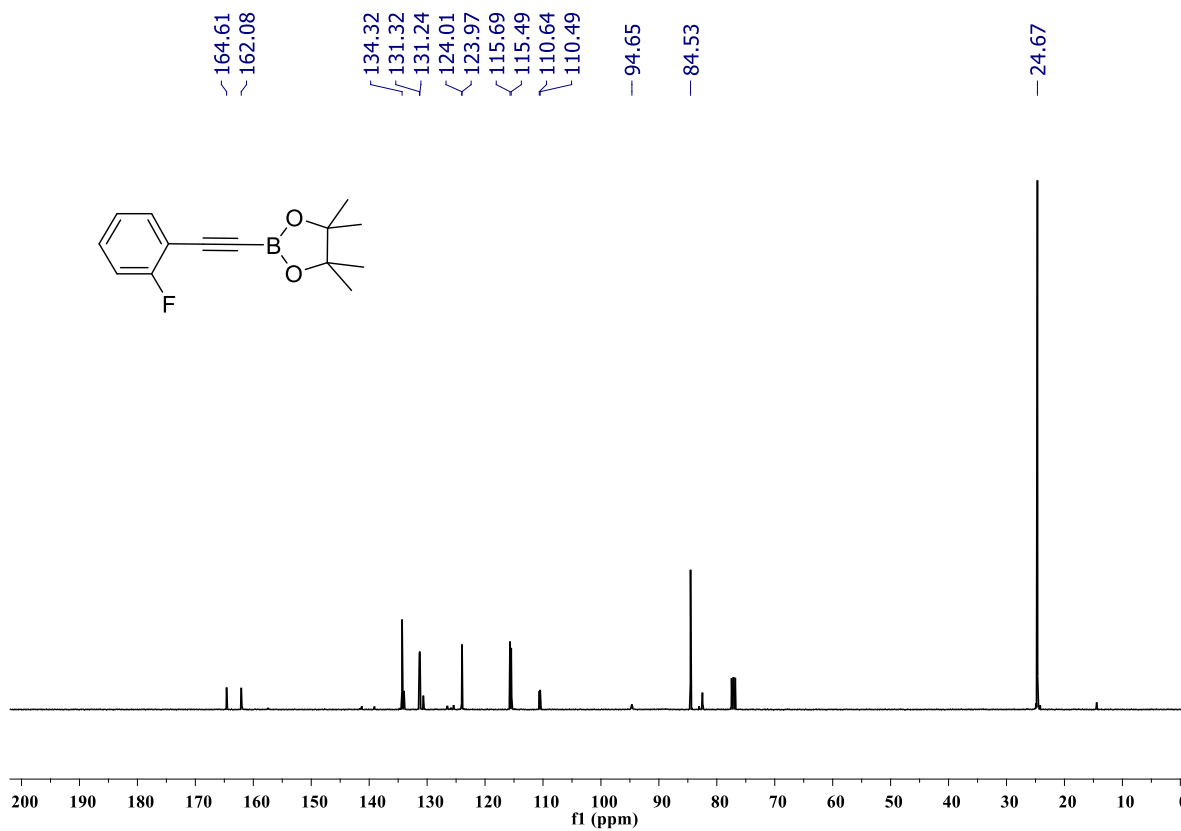

**Figure S85:** <sup>13</sup>C{<sup>1</sup>H} NMR spectrum of compound **2h** (100 MHz, CDCl<sub>3</sub>).

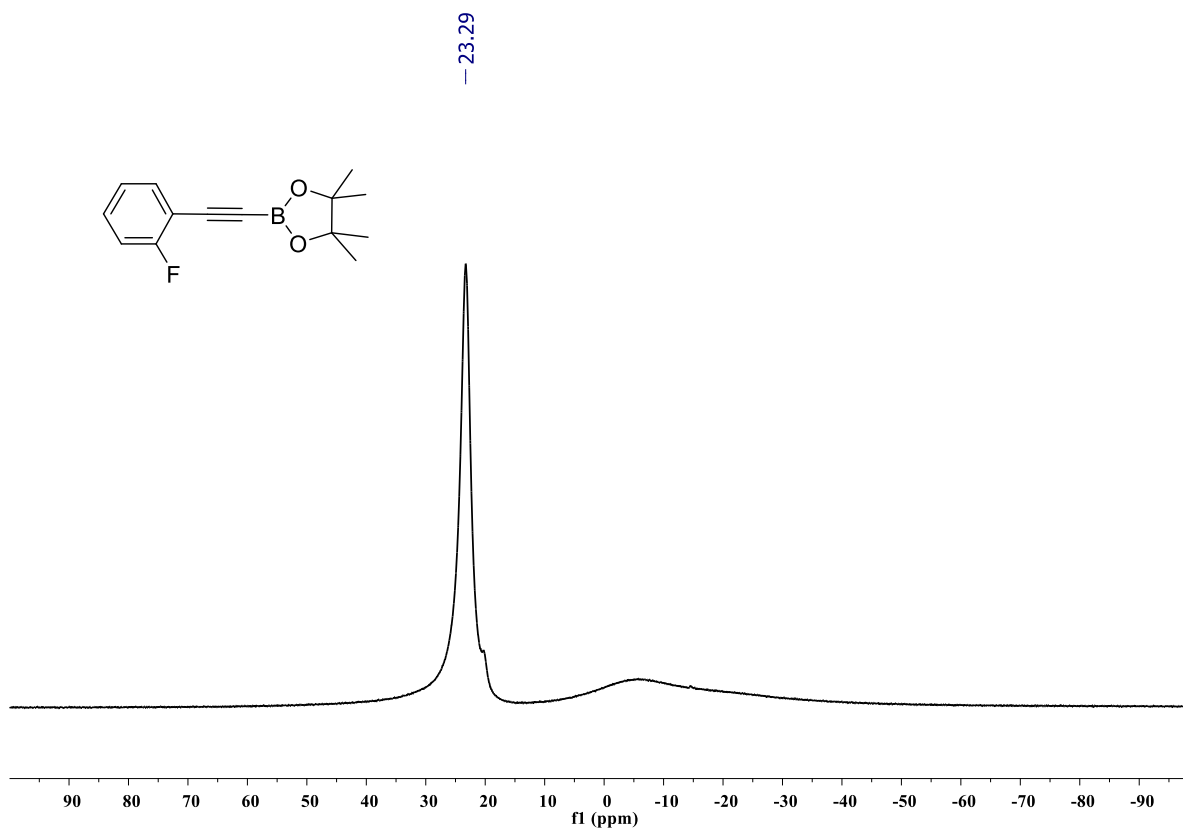

**Figure S86:**  $^{11}\text{B}$  NMR spectrum of compound **2h** (128 MHz,  $\text{CDCl}_3$ ).

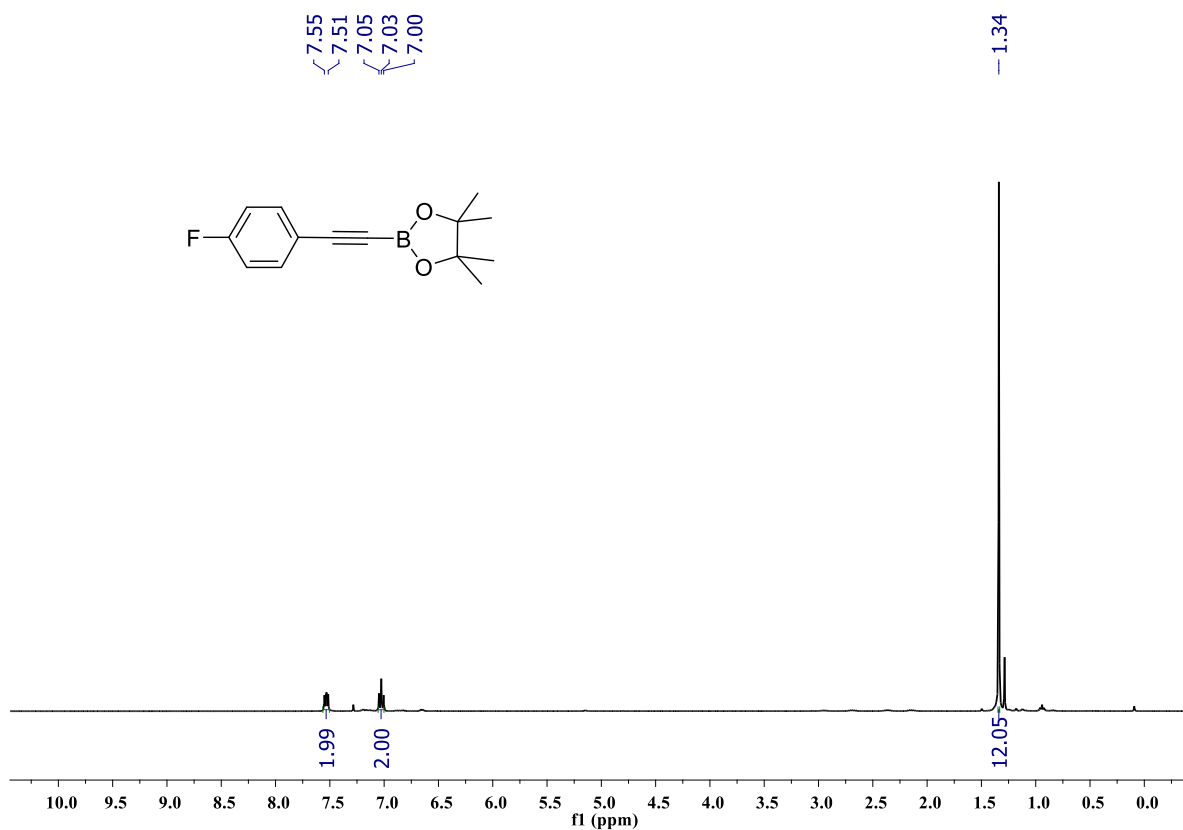

**Figure S87:**  $^1\text{H}$  NMR spectrum of compound **2i** (400 MHz,  $\text{CDCl}_3$ ).

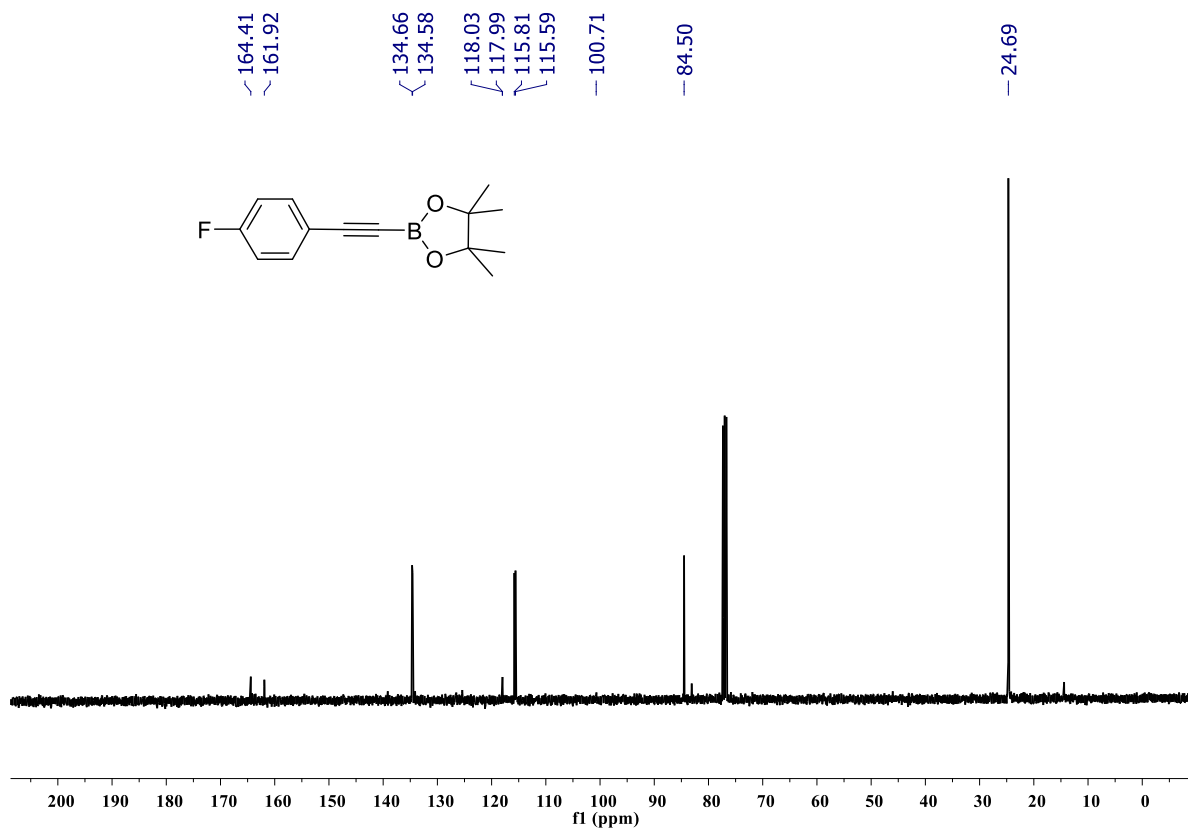

**Figure S88:**  $^{13}\text{C}\{^1\text{H}\}$  NMR spectrum of compound **2i** (100 MHz,  $\text{CDCl}_3$ ).

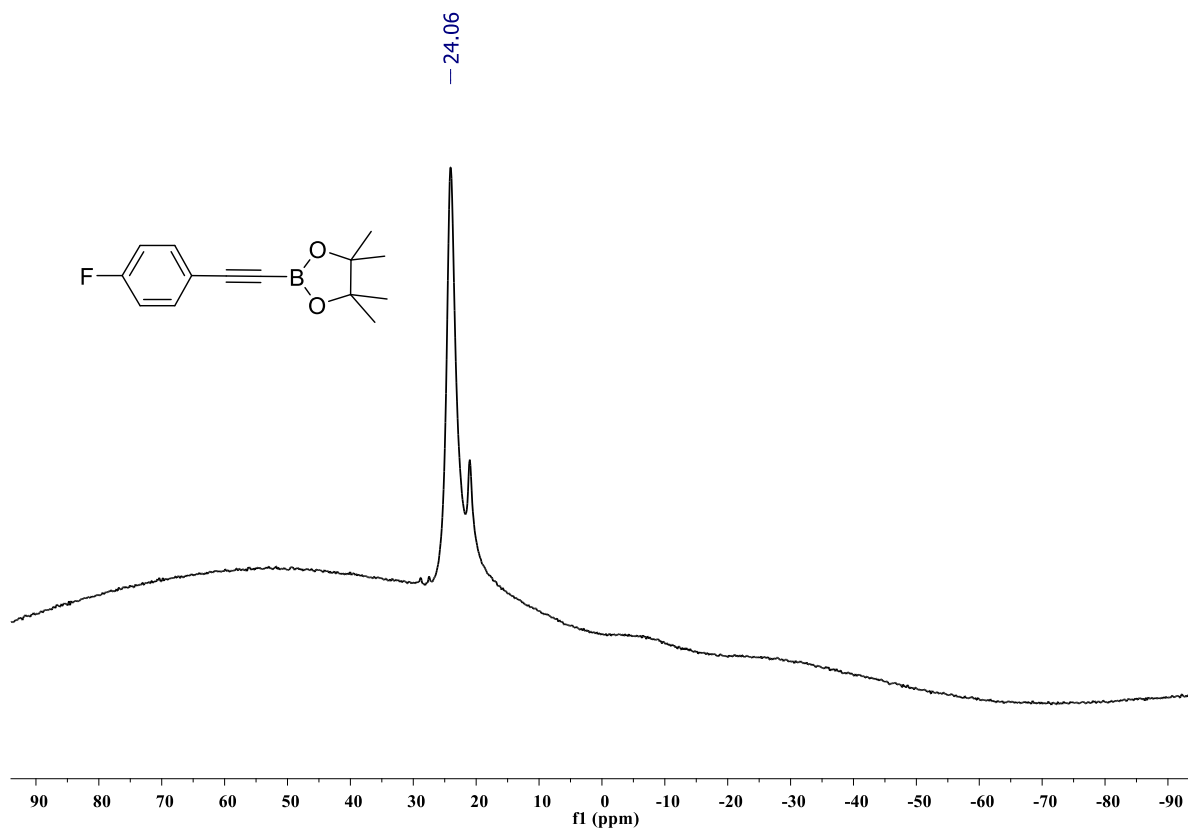

**Figure S89:**  $^{11}\text{B}$  NMR spectrum of compound **2i** (128 MHz,  $\text{CDCl}_3$ ).

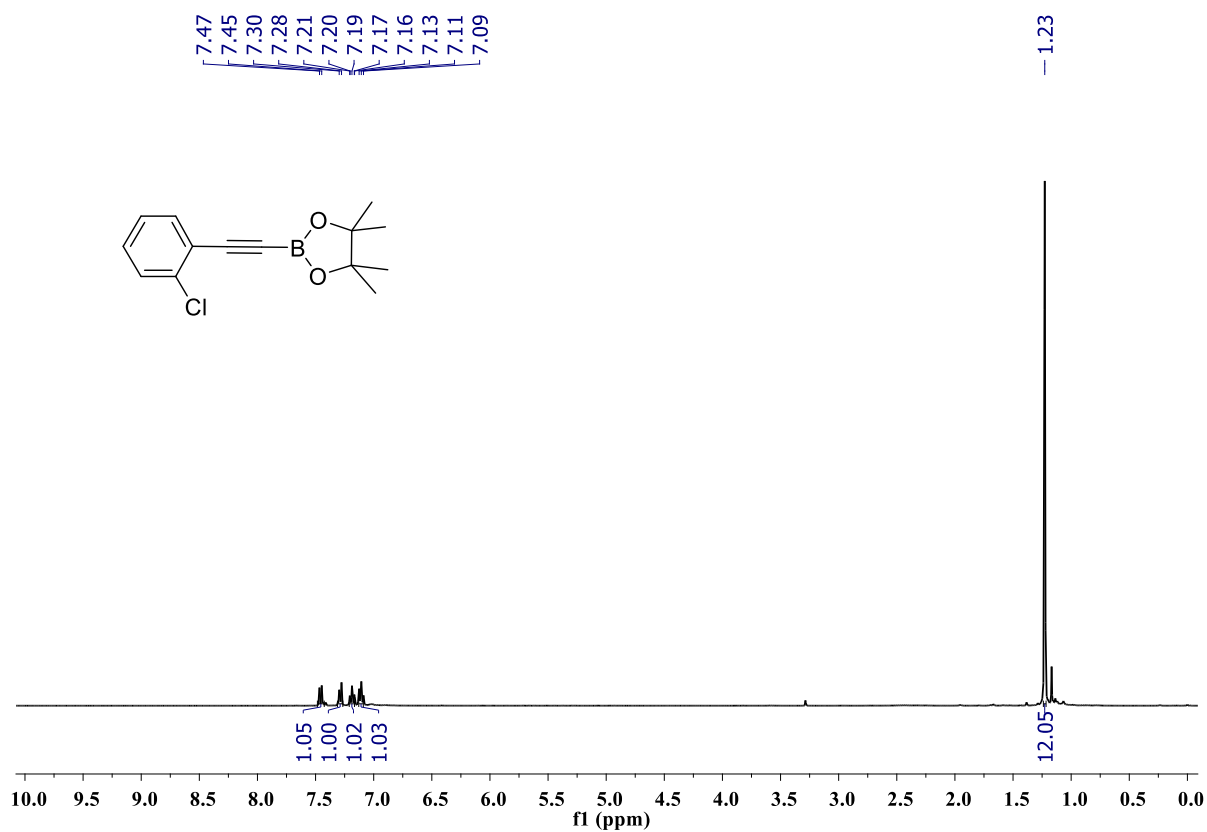

**Figure S90:**  $^1\text{H NMR}$  spectrum of compound **2j** (400 MHz,  $\text{CDCl}_3$ ).

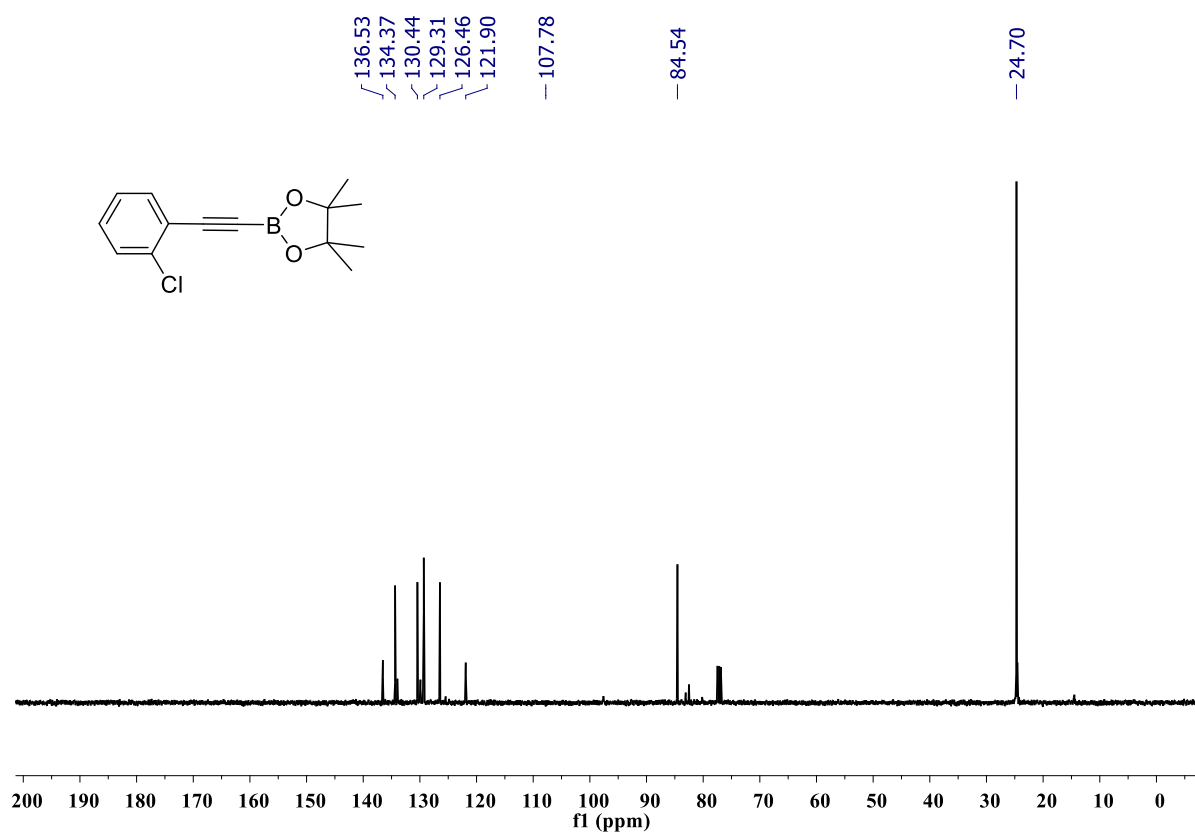

**Figure S91:**  $^{13}\text{C}\{^1\text{H}\}$  NMR spectrum of compound **2j** (100 MHz,  $\text{CDCl}_3$ ).



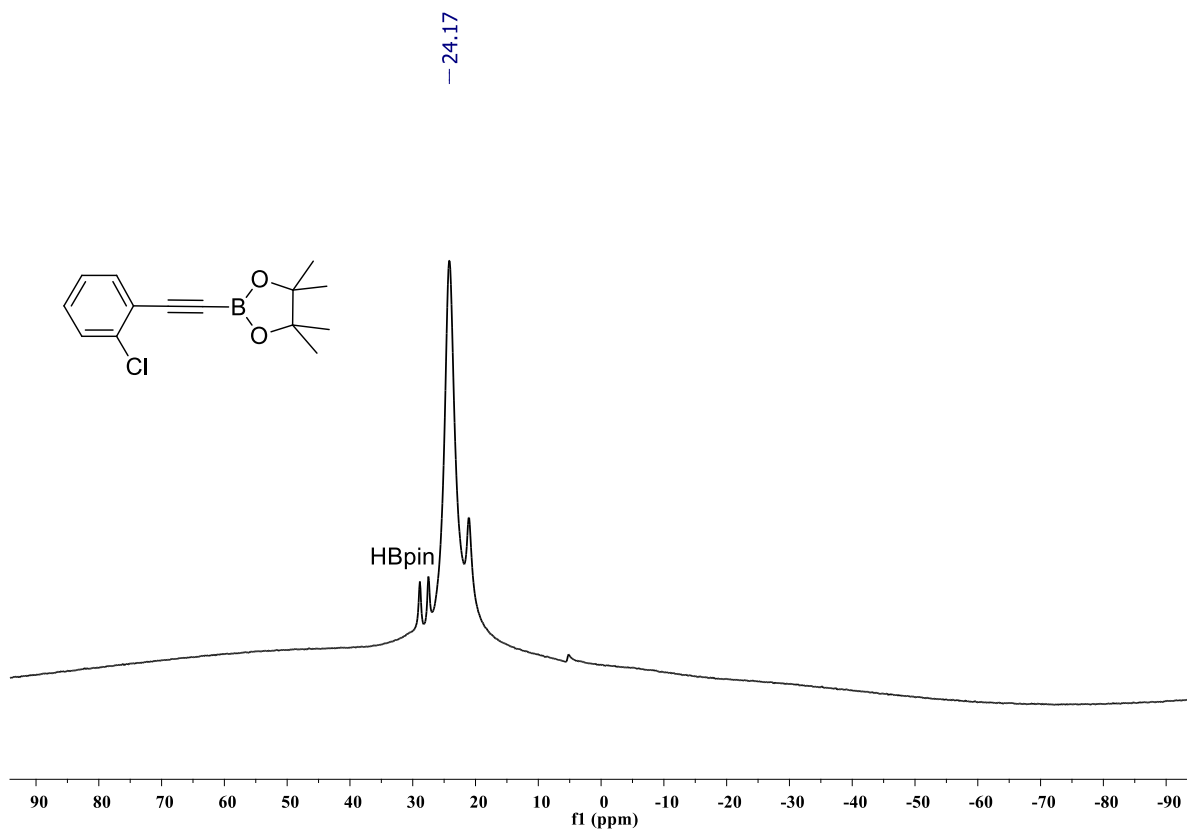

**Figure S92:**  $^{11}\text{B}$  NMR spectrum of compound **2j** (128 MHz,  $\text{CDCl}_3$ ).

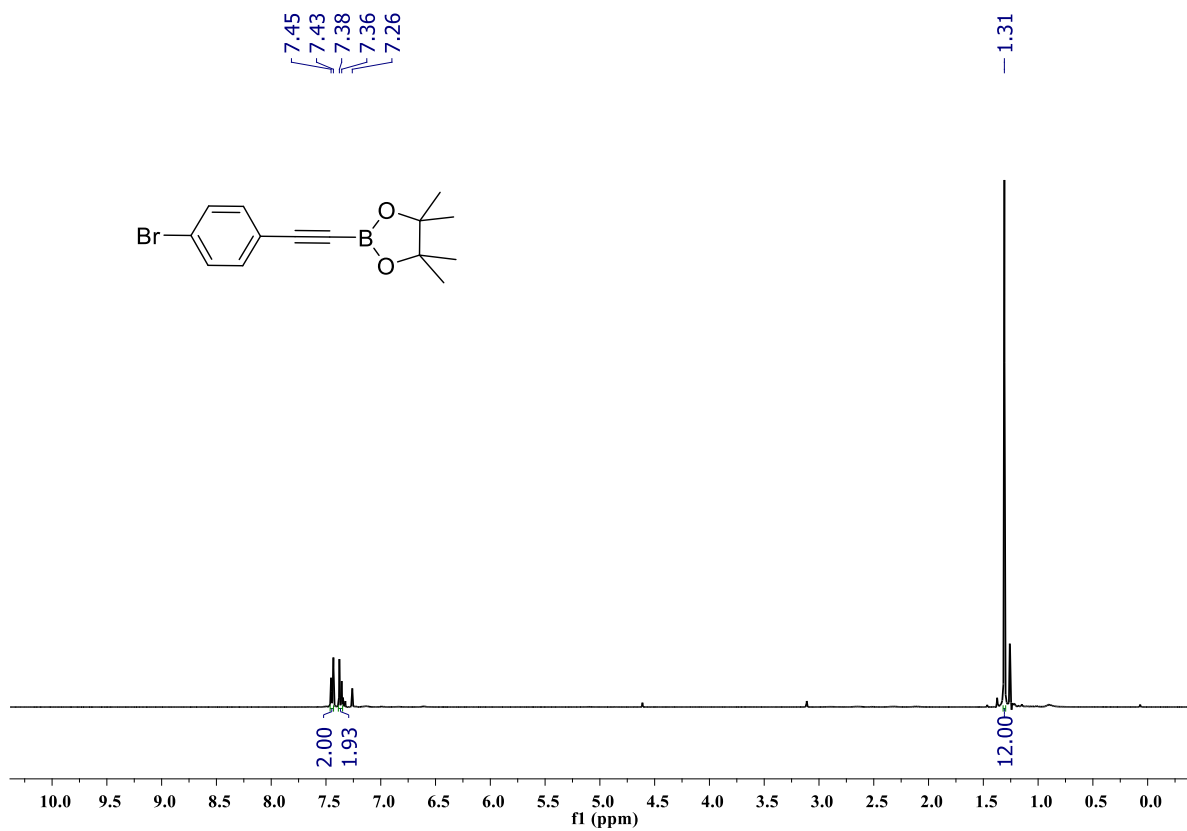

**Figure S93:**  $^1\text{H}$  NMR spectrum of compound **2k** (400 MHz,  $\text{CDCl}_3$ ).

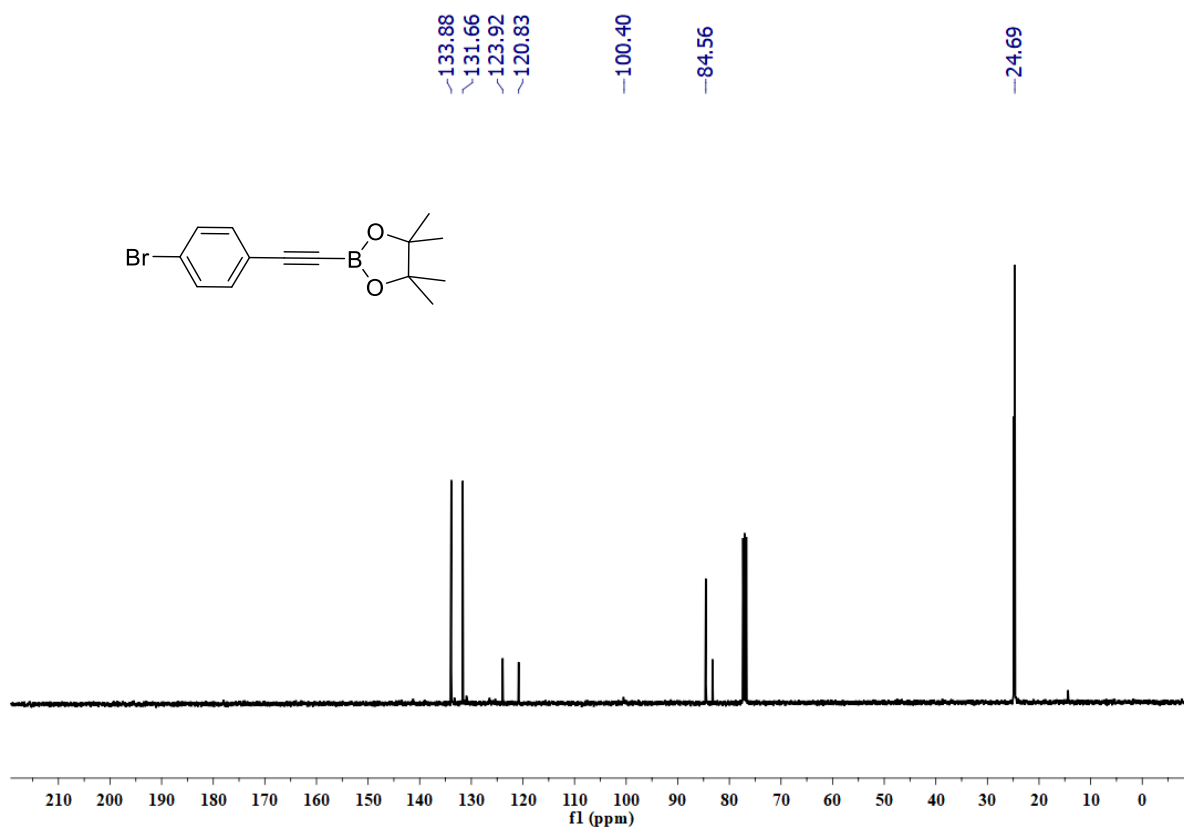

**Figure S94:**  $^{13}\text{C}\{^1\text{H}\}$  NMR spectrum of compound **2k** (100 MHz,  $\text{CDCl}_3$ ).

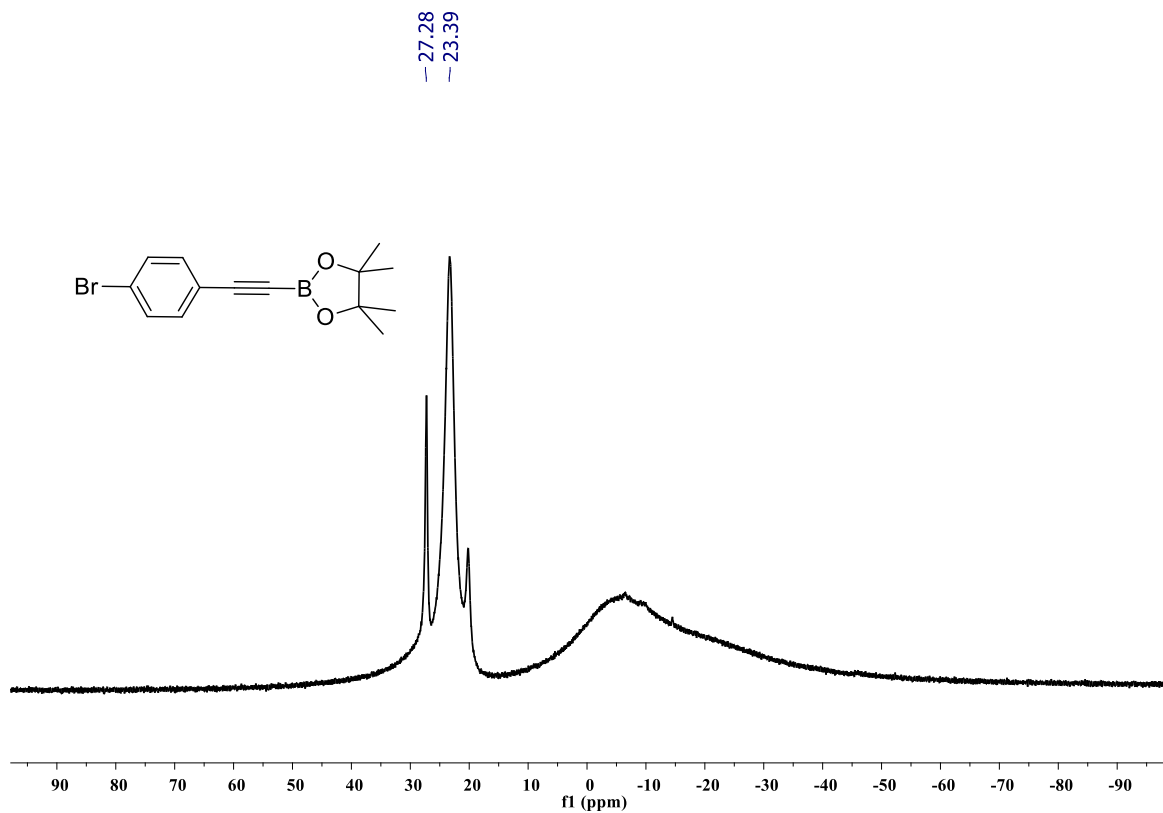

**Figure S95:**  $^{11}\text{B}\{^1\text{H}\}$  NMR spectrum of compound **2k** (128 MHz,  $\text{CDCl}_3$ ). A peak observed at  $\delta$  27.28 ppm arises from free HBpin.

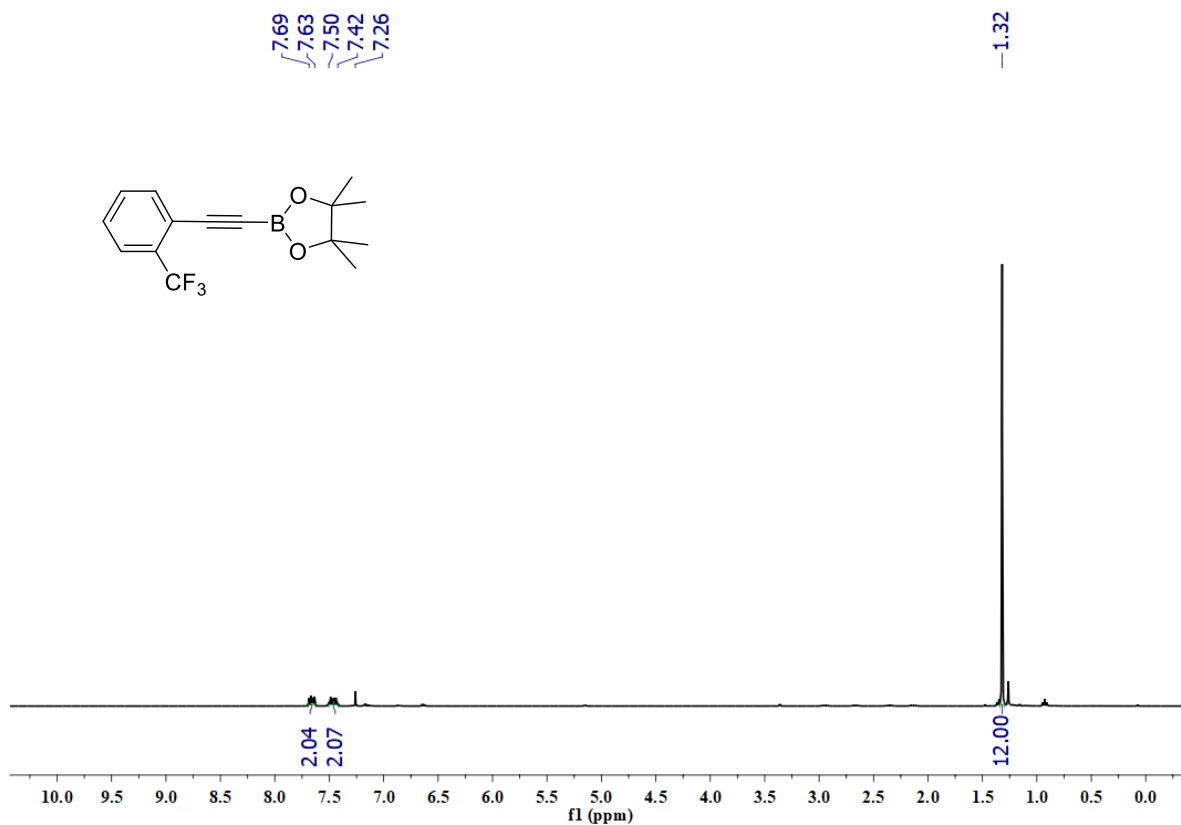

**Figure S96:**  $^1\text{H}$  NMR spectrum of compound **2I** (400 MHz,  $\text{CDCl}_3$ ).

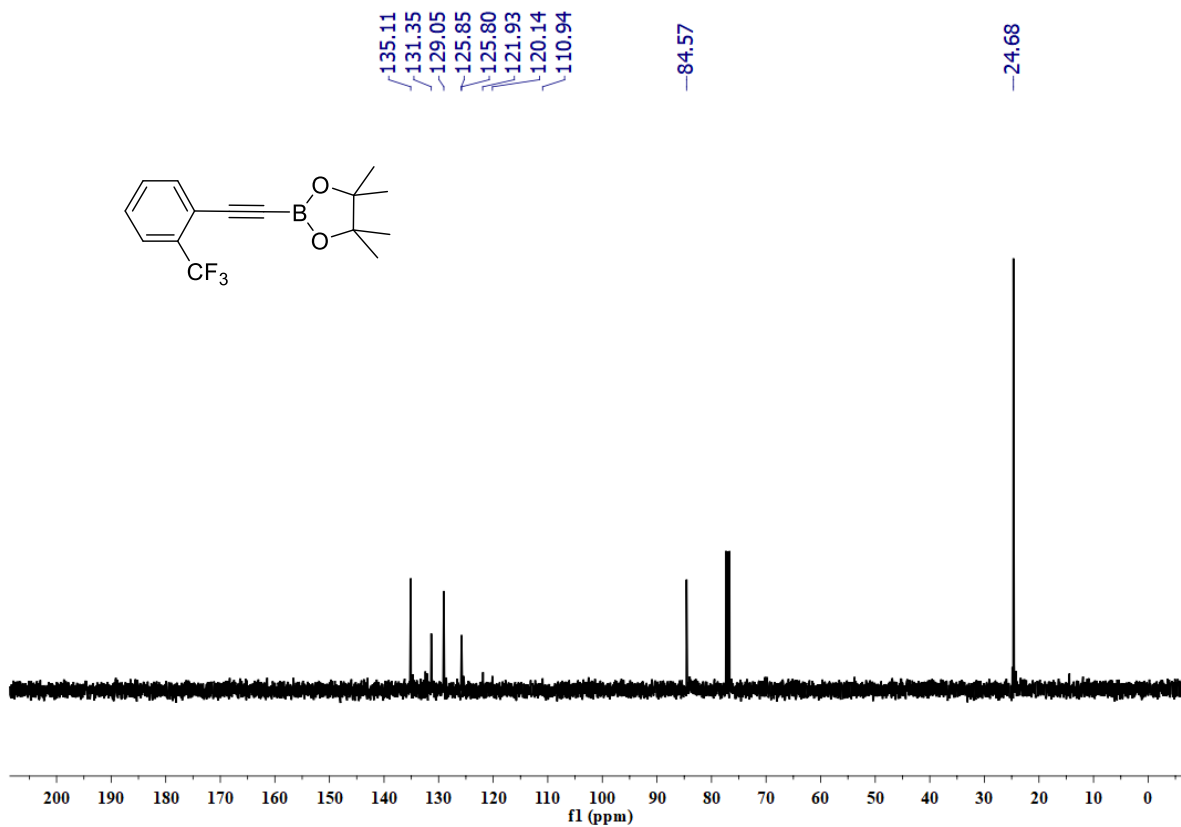

**Figure S97:**  $^{13}\text{C}\{^1\text{H}\}$  NMR spectrum of compound **2I** (100 MHz,  $\text{CDCl}_3$ ).

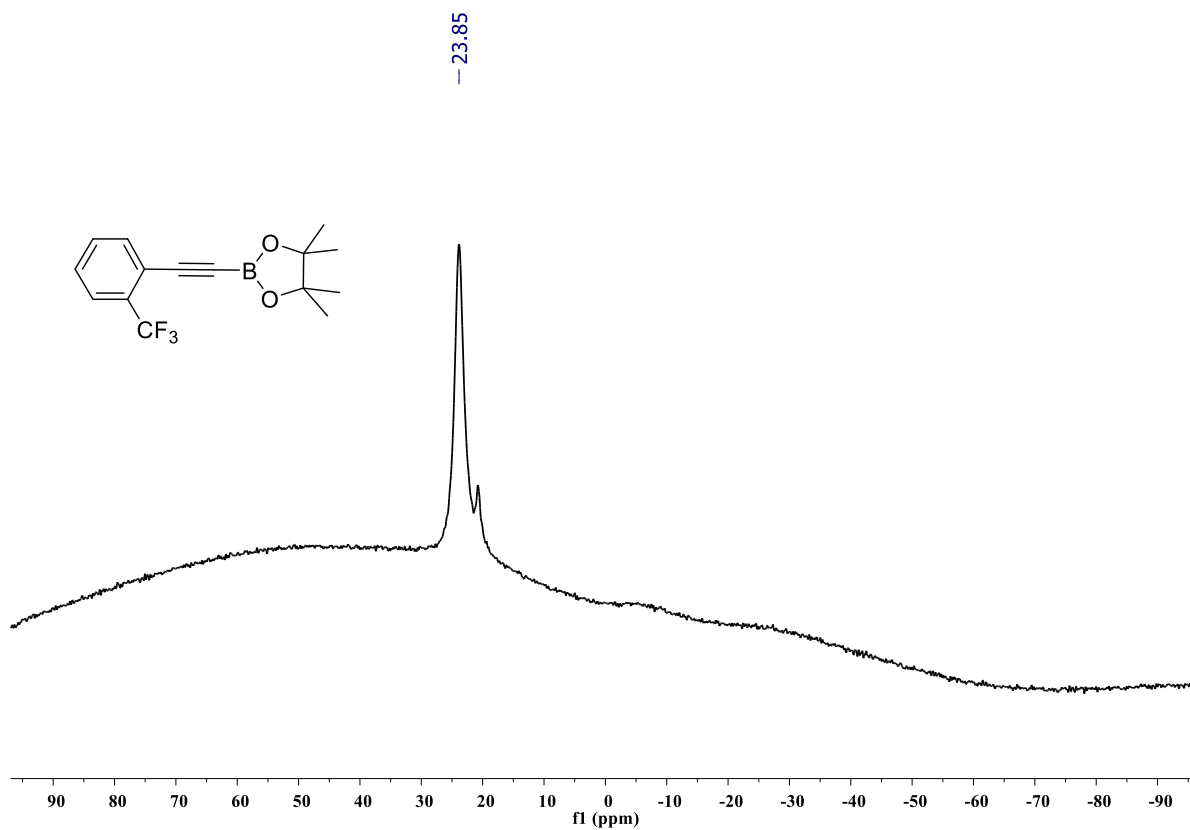

**Figure S98:**  $^{11}\text{B}$  NMR spectrum of compound **2l** (128 MHz,  $\text{CDCl}_3$ ).

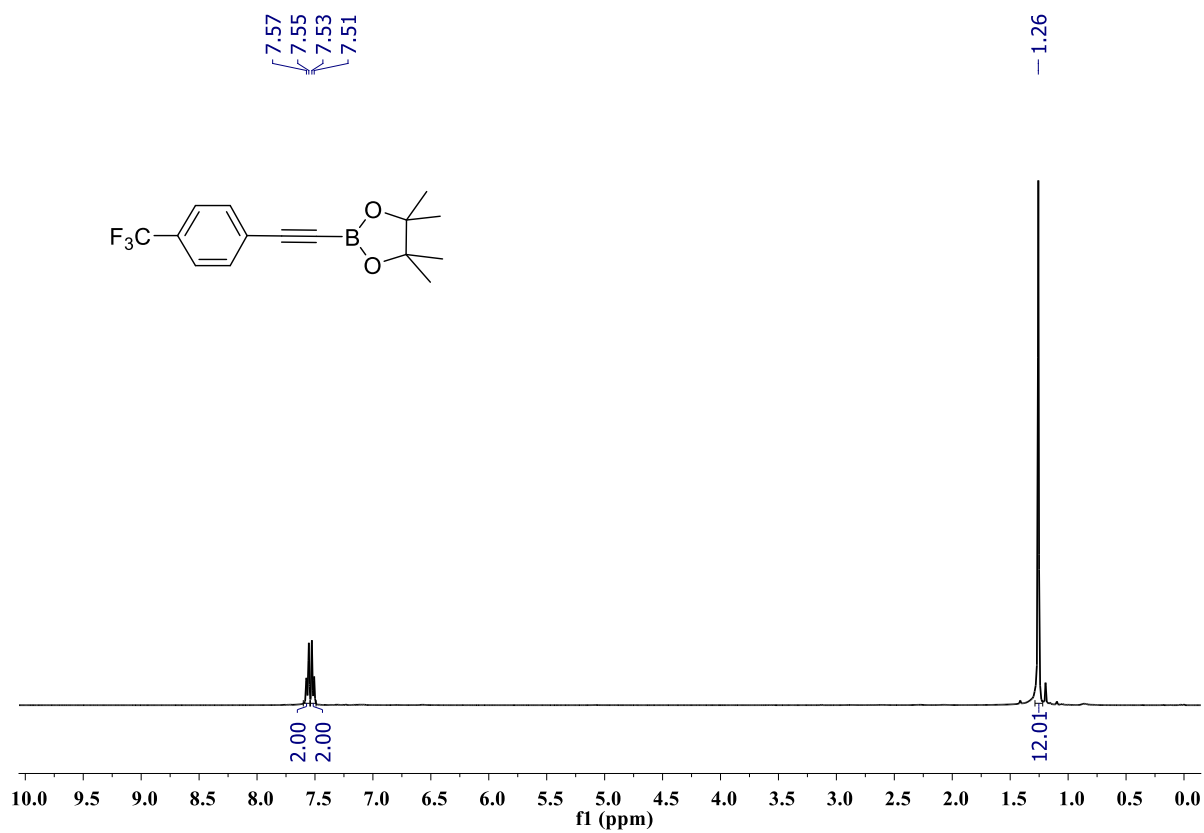

**Figure S99:**  $^1\text{H}$  NMR spectrum of compound **2m** (400 MHz,  $\text{CDCl}_3$ ).

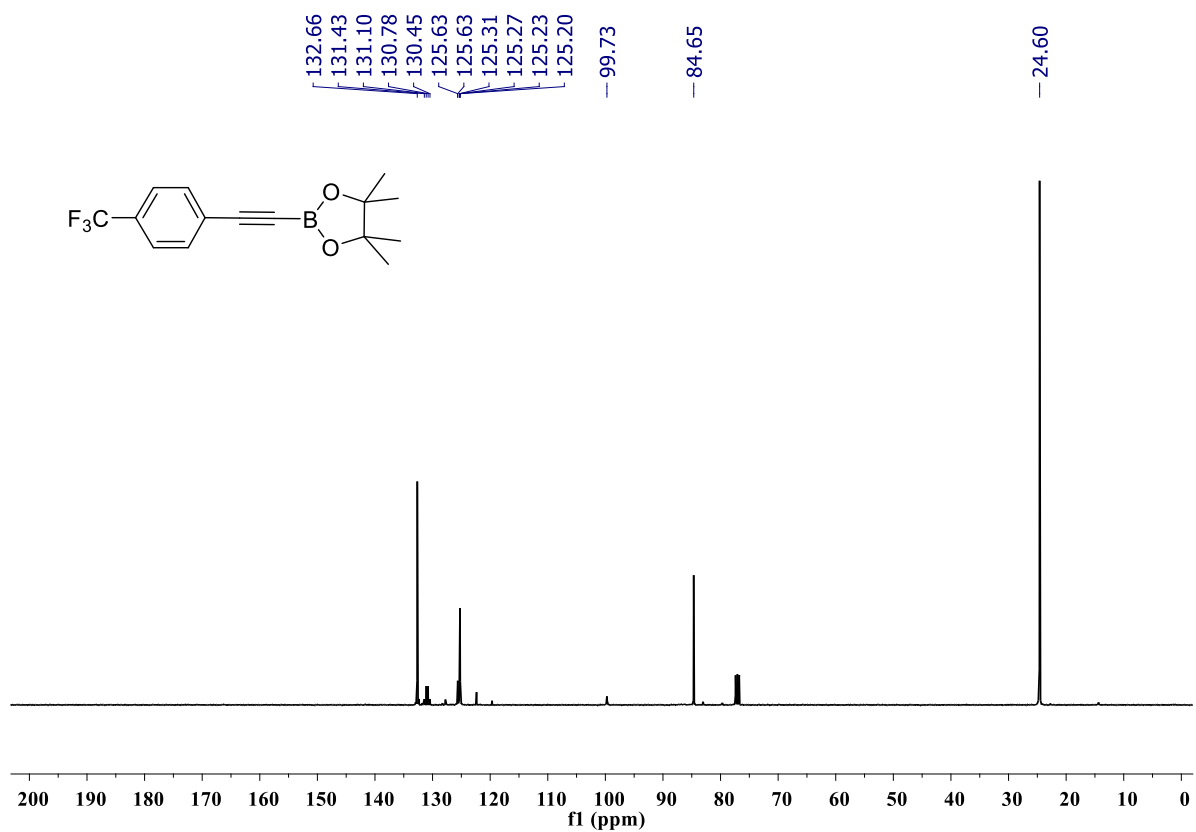

**Figure S100:**  $^{13}\text{C}\{^1\text{H}\}$  NMR spectrum of compound **2m** (100 MHz,  $\text{CDCl}_3$ ).

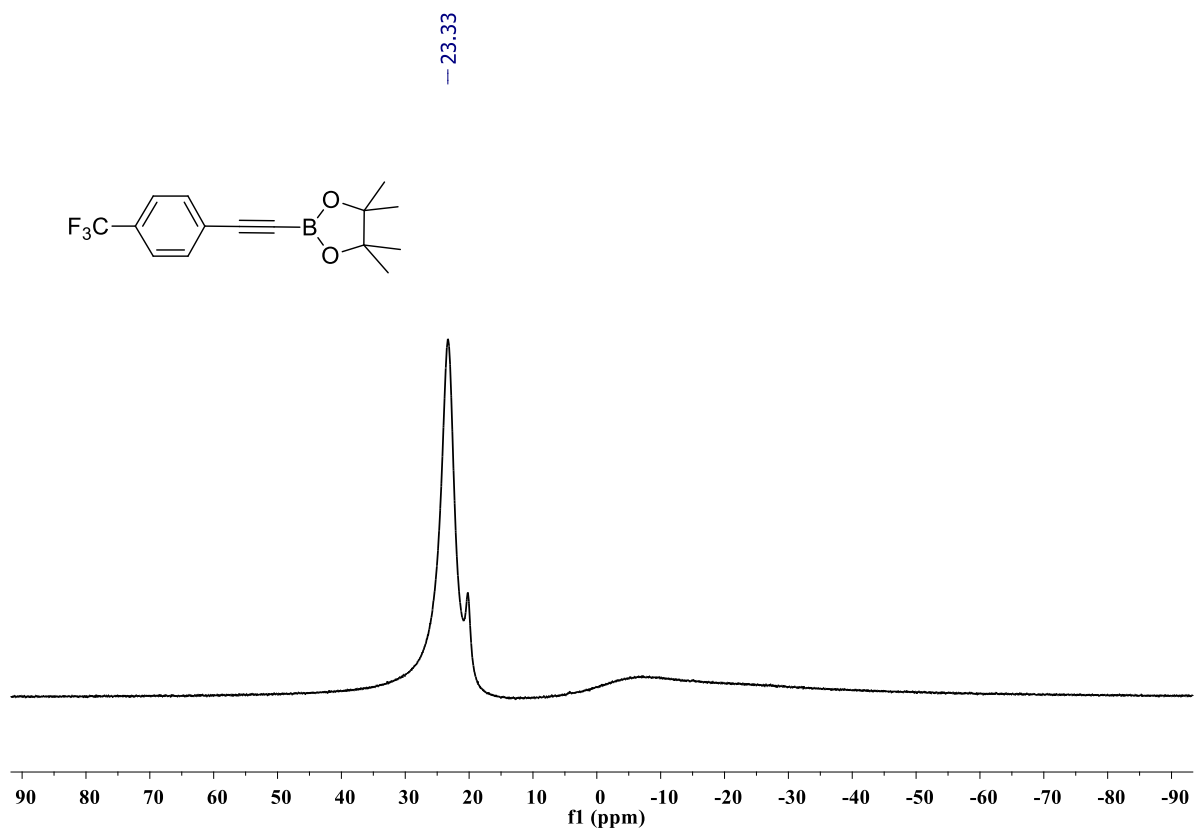

**Figure S101:**  $^{11}\text{B}$  NMR spectrum of compound **2m** (128 MHz,  $\text{CDCl}_3$ ).

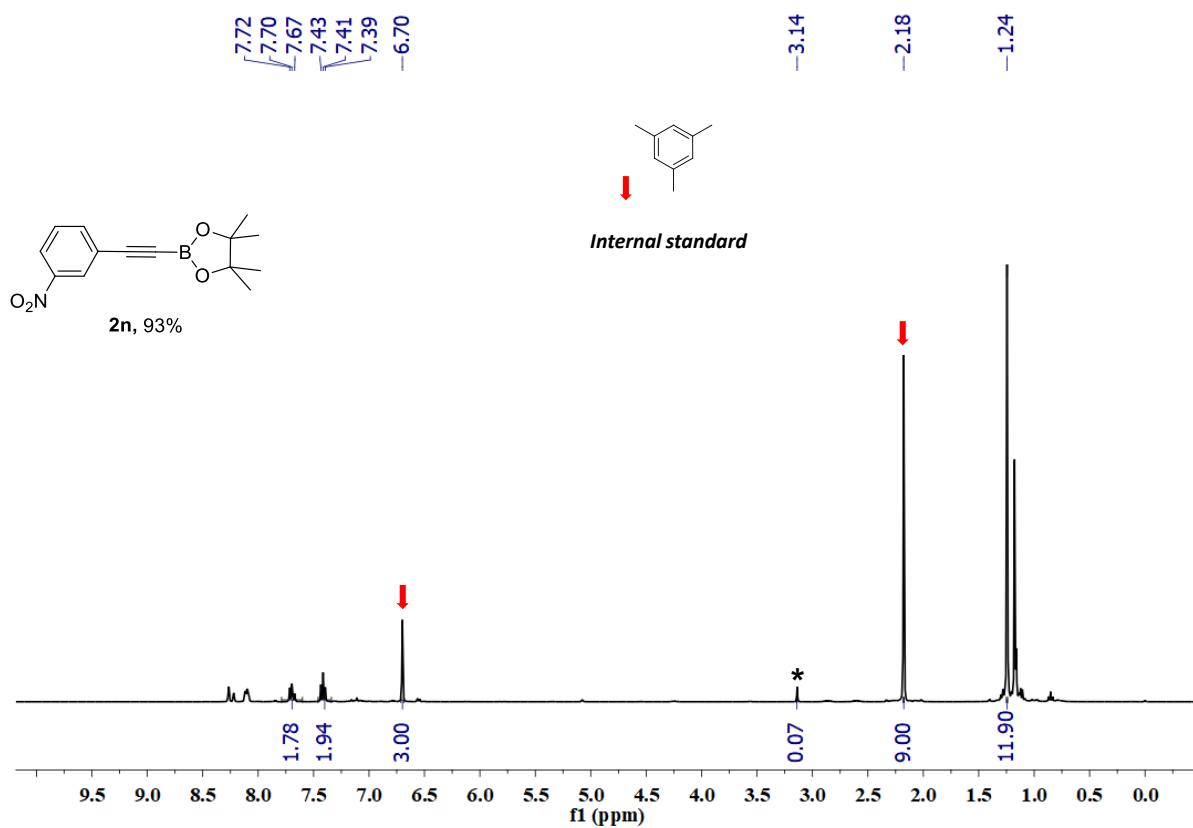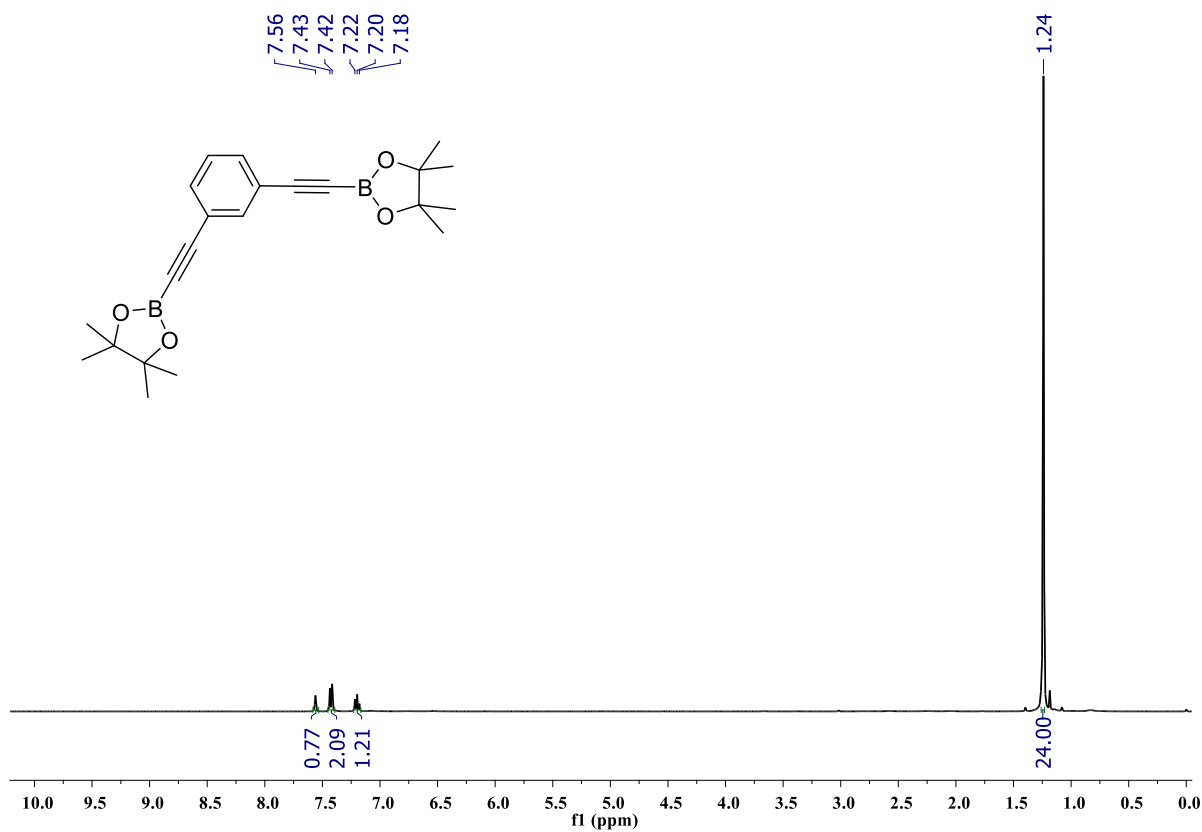

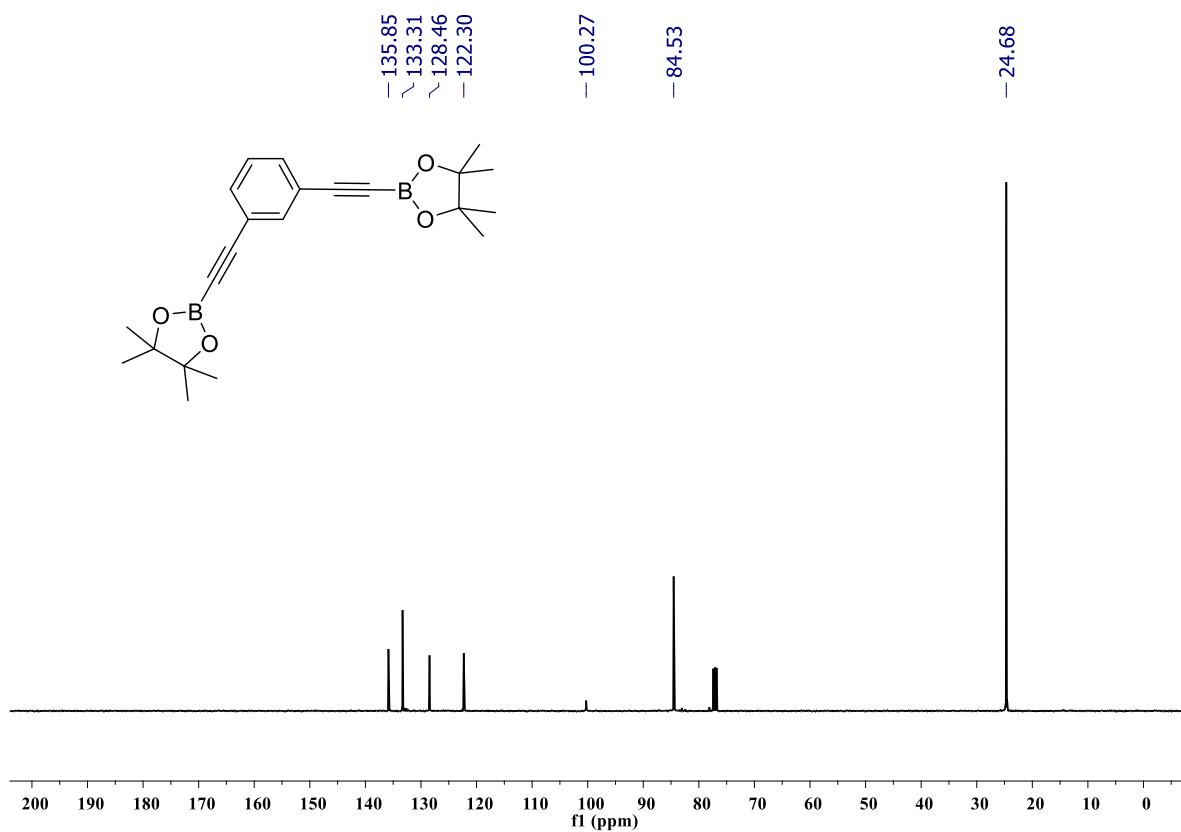

**Figure S104:**  $^{13}\text{C}\{^1\text{H}\}$  NMR spectrum of compound **2o** (100 MHz,  $\text{CDCl}_3$ ).

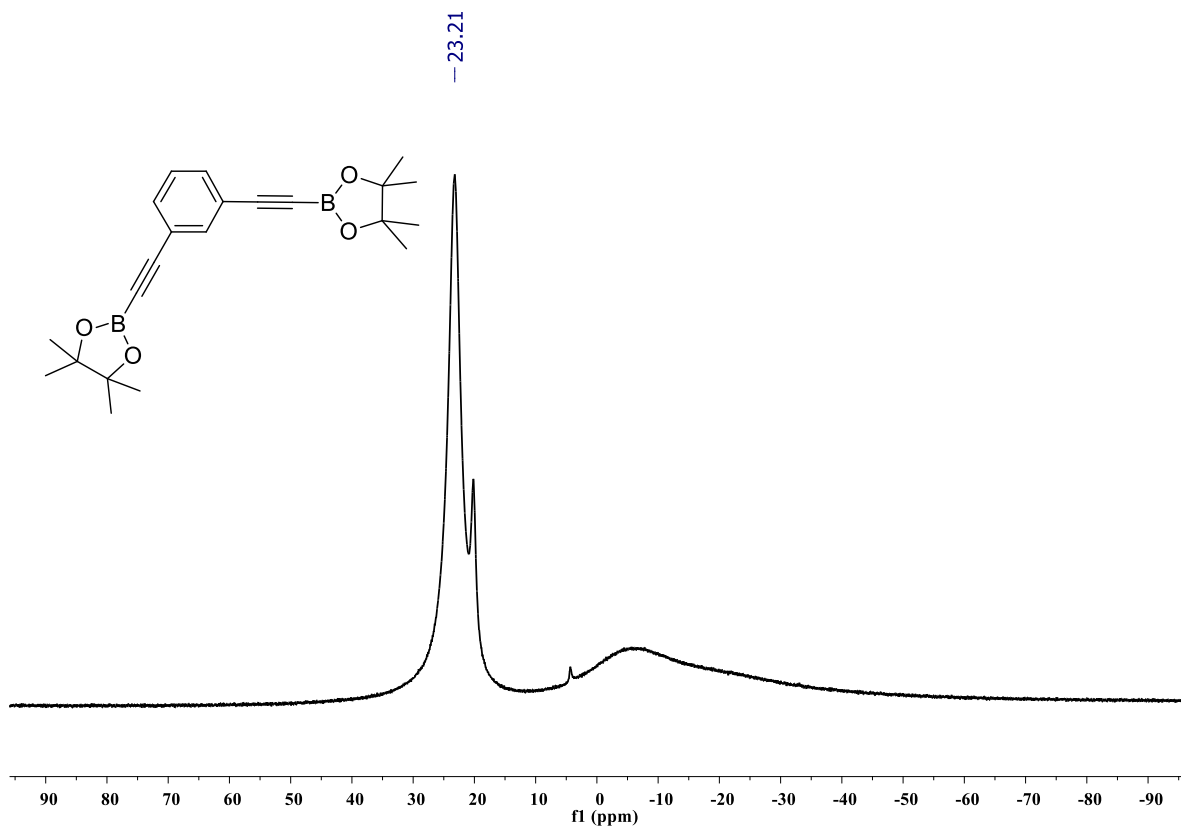

**Figure S105:**  $^{11}\text{B}$  NMR spectrum of compound **2o** (128 MHz,  $\text{CDCl}_3$ ).

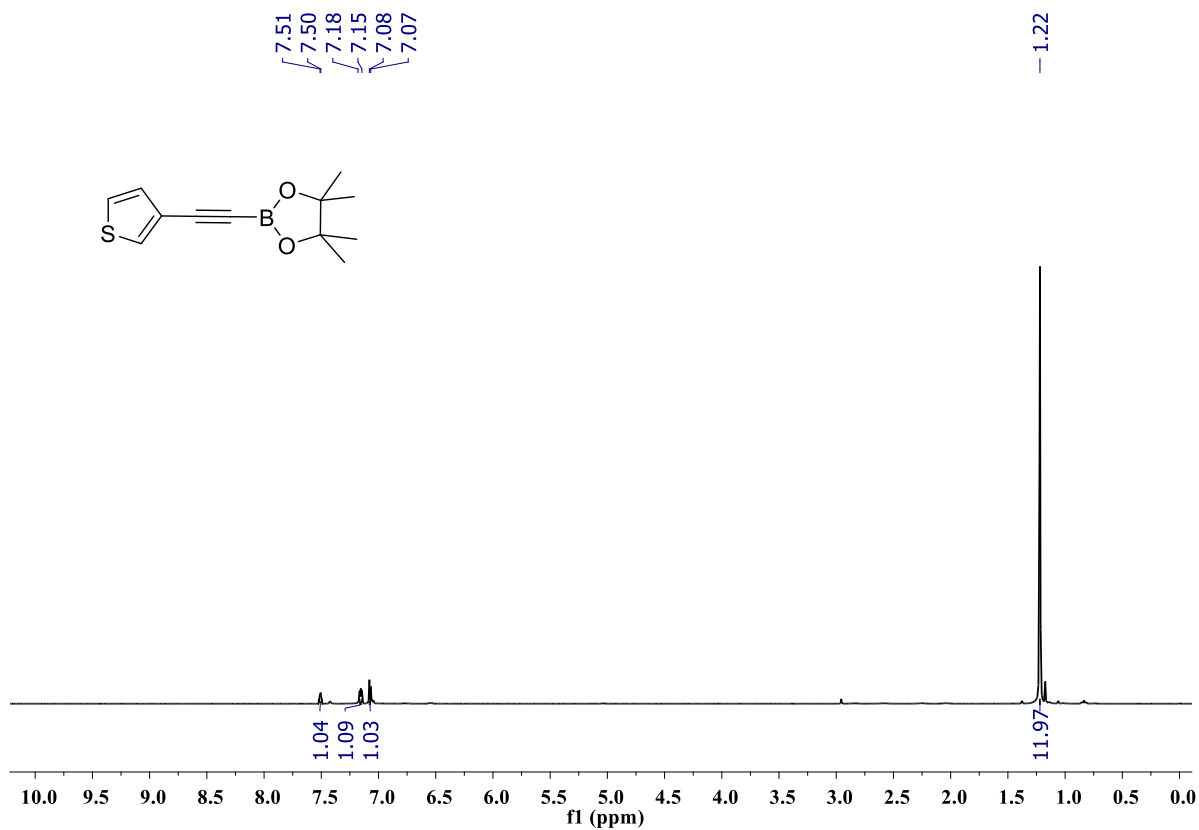

**Figure S106:**  $^1\text{H}$  NMR spectrum of compound **2p** (400 MHz,  $\text{CDCl}_3$ ).

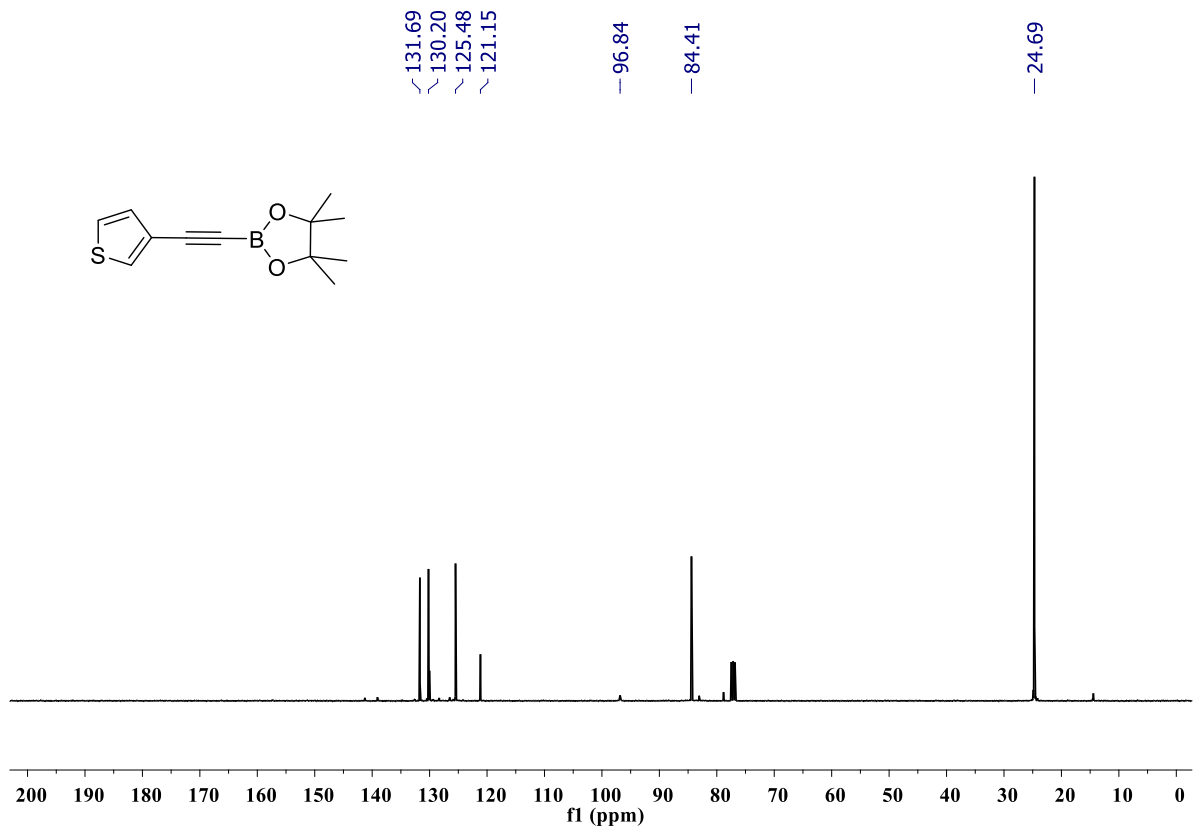

**Figure S107:**  $^{13}\text{C}\{^1\text{H}\}$  NMR spectrum of compound **2p** (100 MHz,  $\text{CDCl}_3$ ).



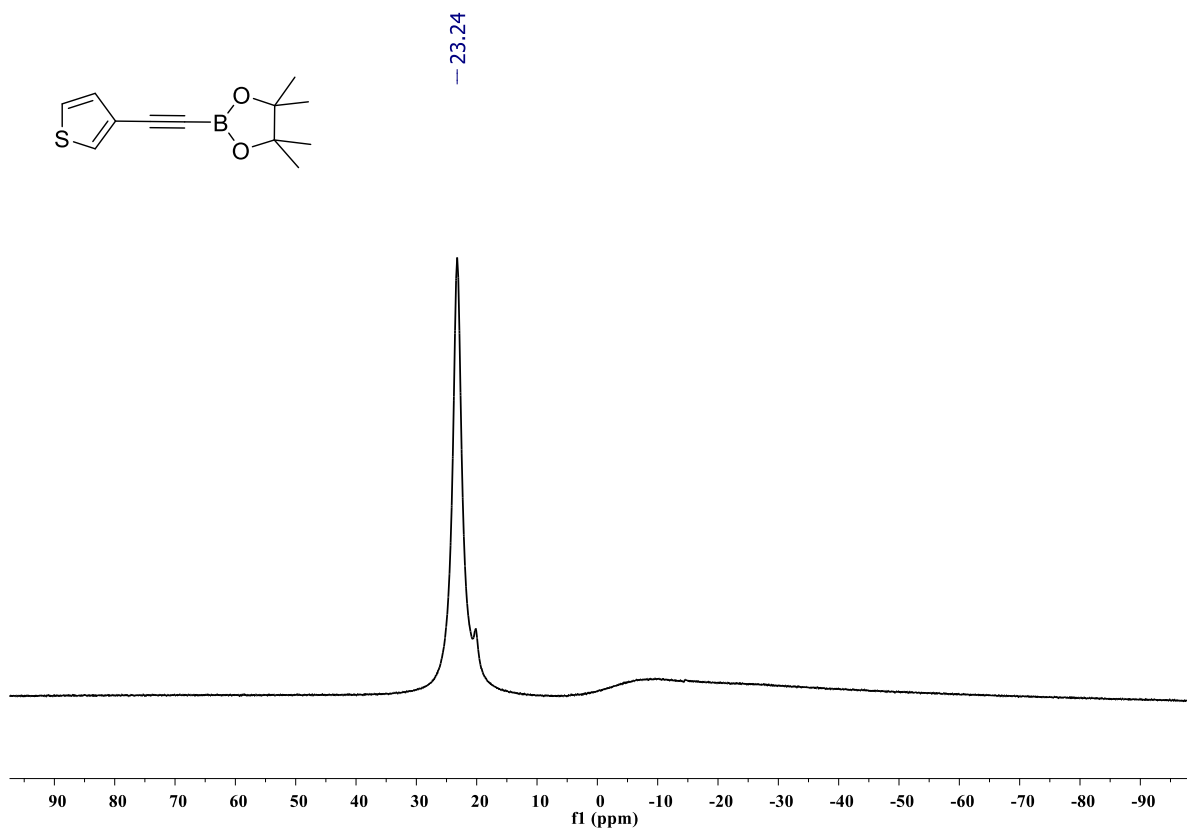

**Figure S108:**  $^{11}\text{B}$  NMR spectrum of compound **2p** (128 MHz,  $\text{CDCl}_3$ ).

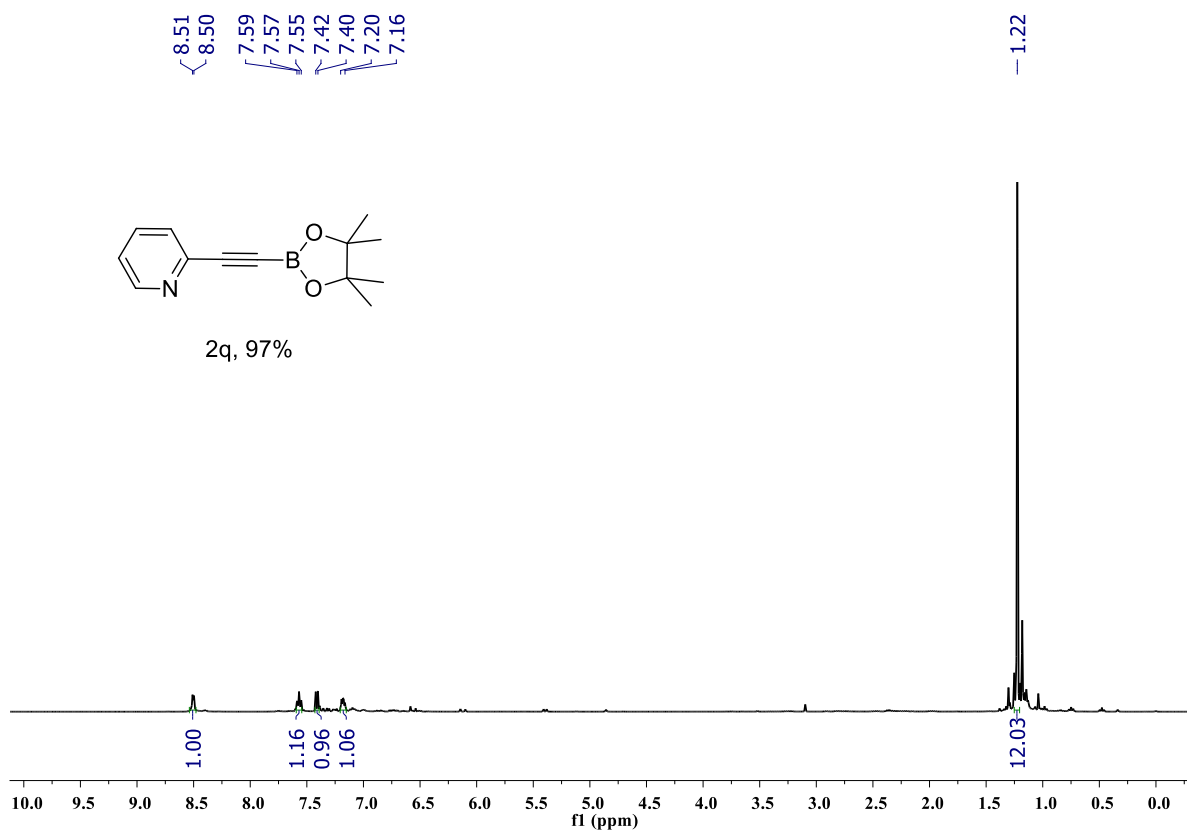

**Figure S109:**  $^1\text{H}$  NMR spectrum of compound **2q** (400 MHz,  $\text{CDCl}_3$ ).

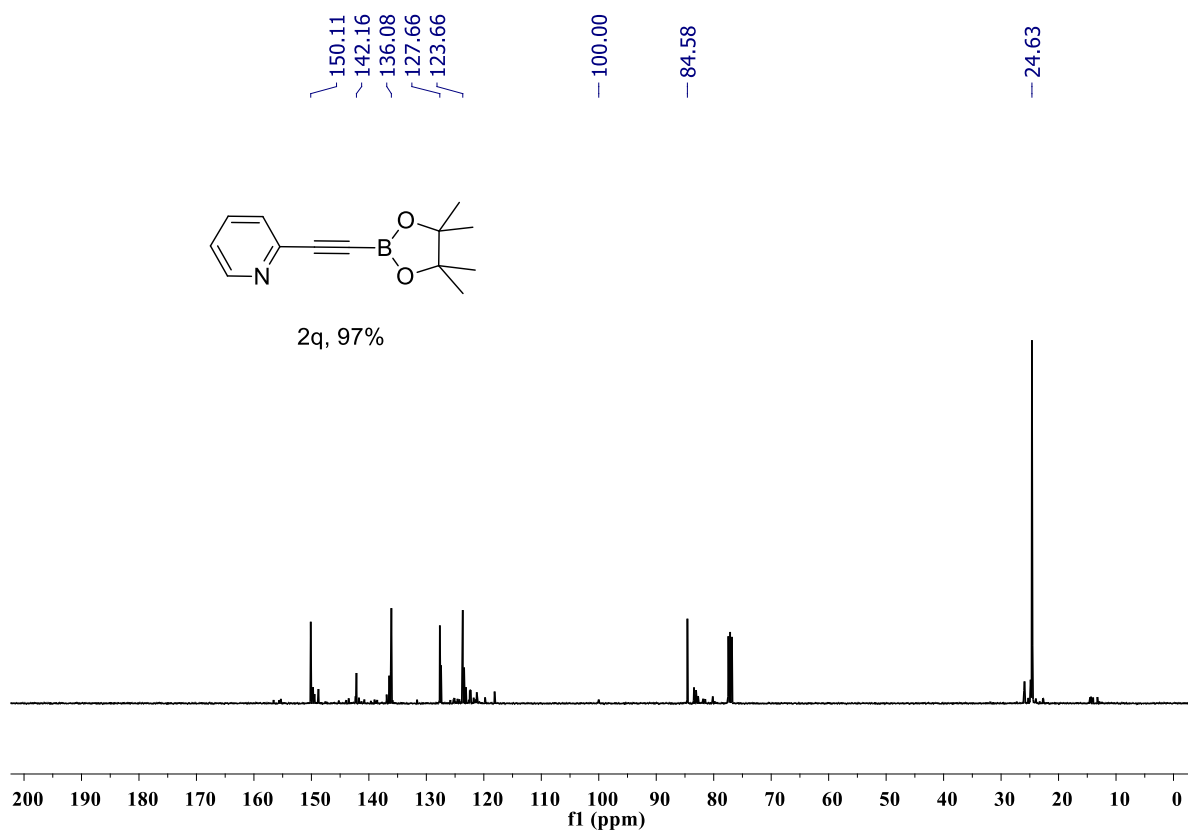

**Figure S110:**  $^{13}\text{C}\{^1\text{H}\}$  NMR spectrum of compound **2q** (100 MHz,  $\text{CDCl}_3$ ).

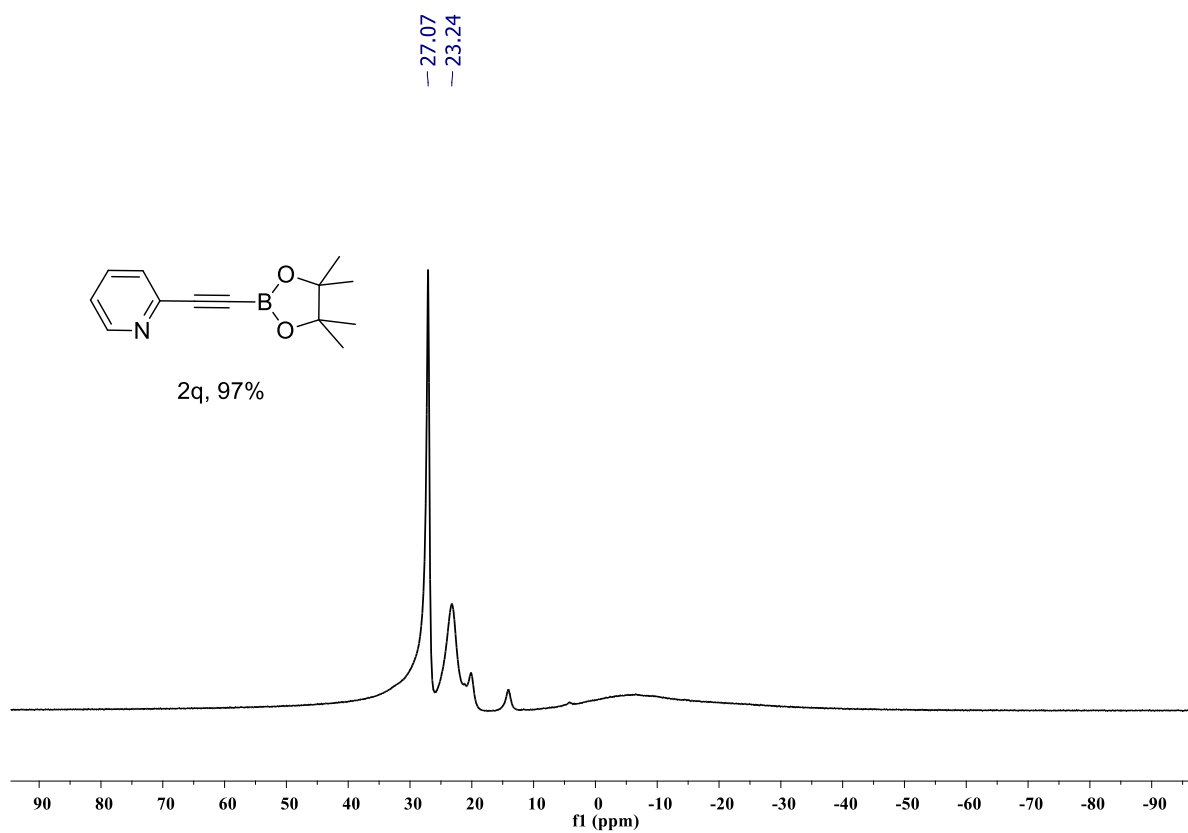

**Figure S111:**  $^{11}\text{B}\{^1\text{H}\}$  NMR spectrum of compound **2q** (128 MHz,  $\text{CDCl}_3$ ). A peak observed at  $\delta$  27.07 ppm arises from free HBpin.

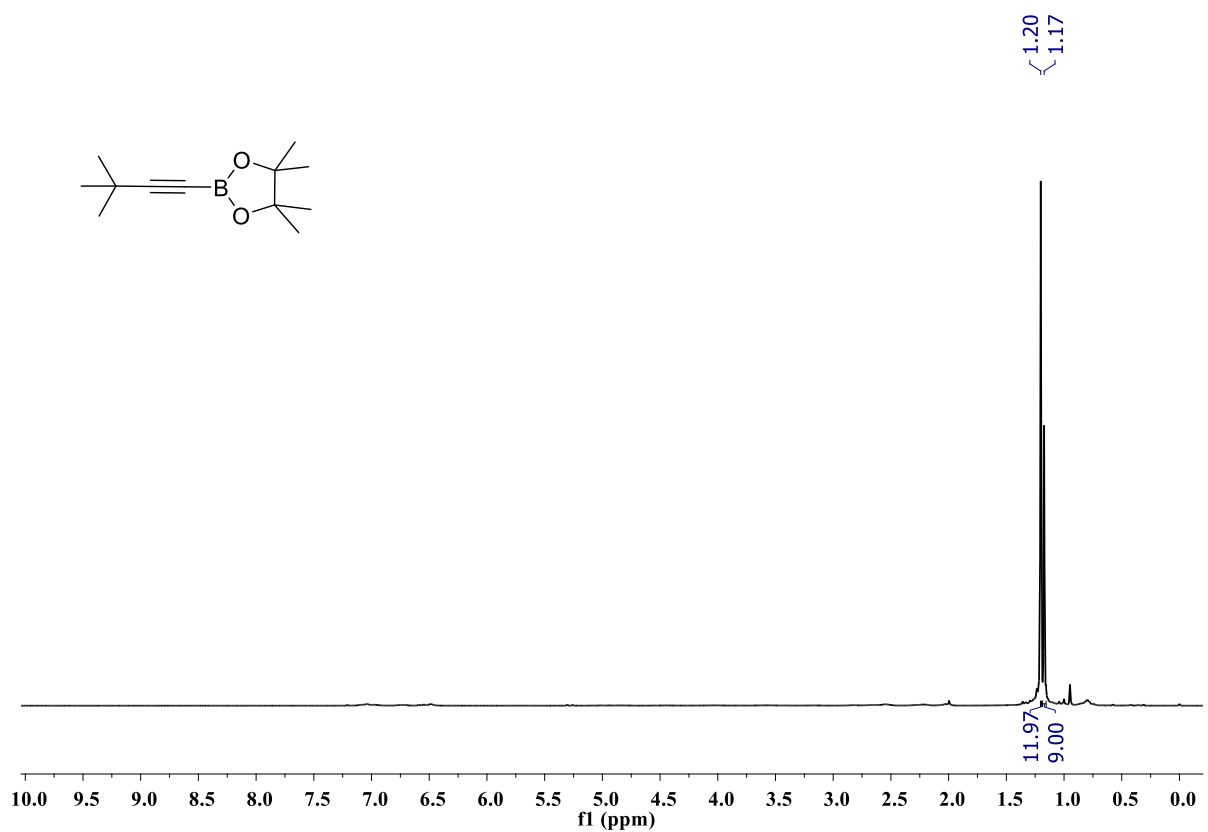

**Figure S112:**  $^1\text{H}$  NMR spectrum of compound **2r** (400 MHz,  $\text{CDCl}_3$ ).

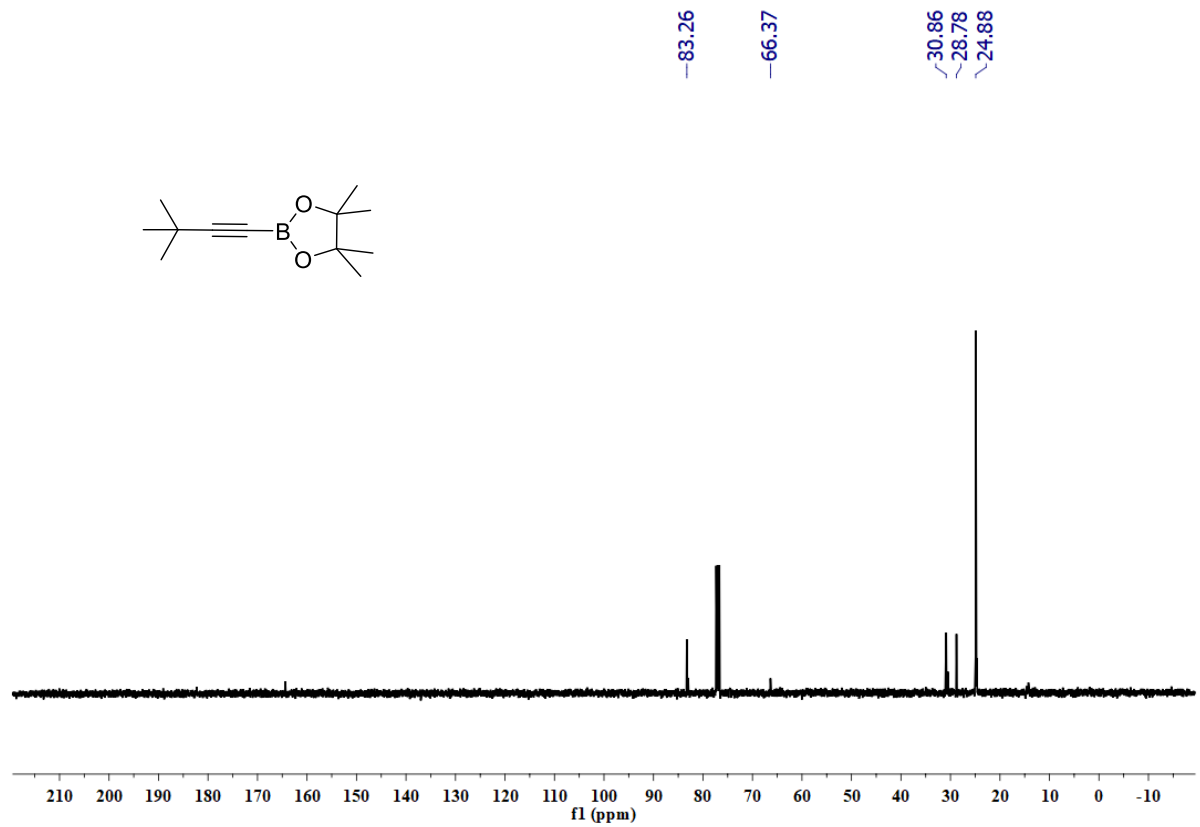

**Figure S113:**  $^{13}\text{C}\{^1\text{H}\}$  NMR spectrum of compound **2r** (100 MHz,  $\text{CDCl}_3$ ).

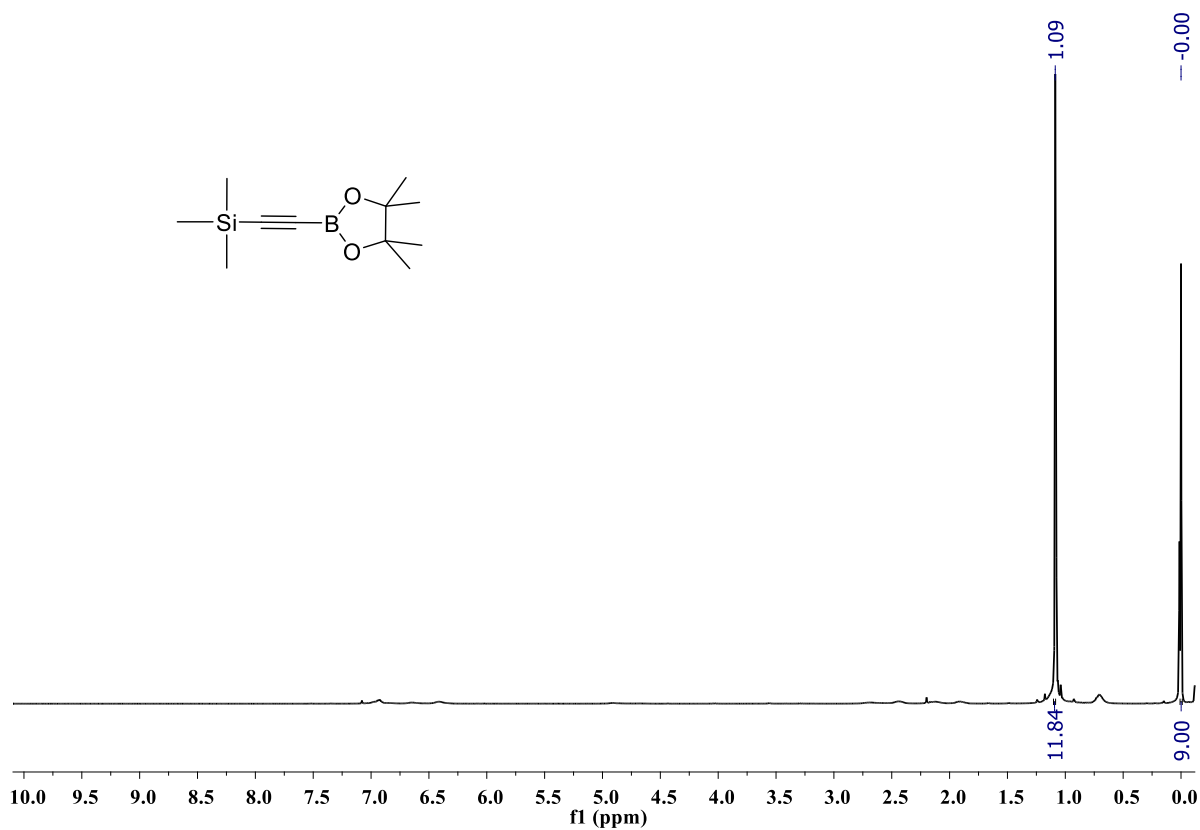

**Figure S114:** <sup>1</sup>H NMR spectrum of compound 2s (400 MHz, CDCl<sub>3</sub>).

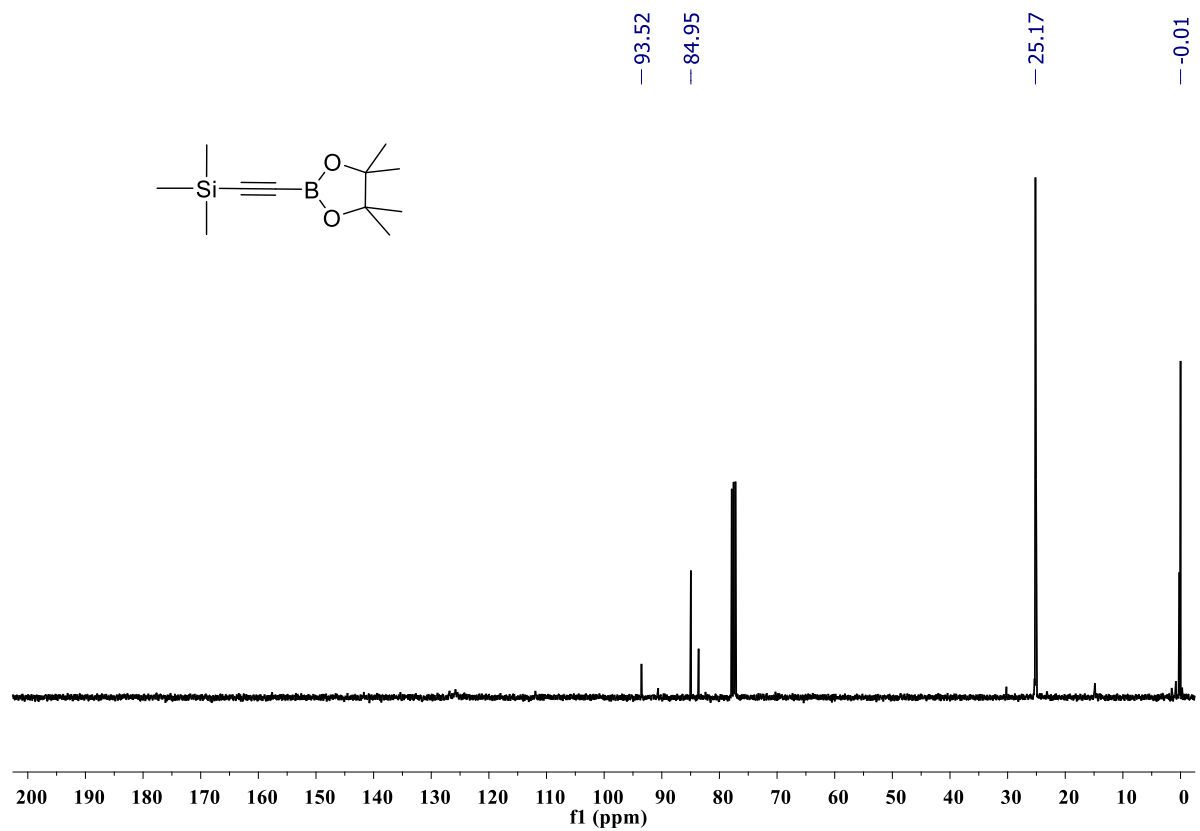

**Figure S115:** <sup>13</sup>C{<sup>1</sup>H} NMR spectrum of compound 2s (100 MHz, CDCl<sub>3</sub>).

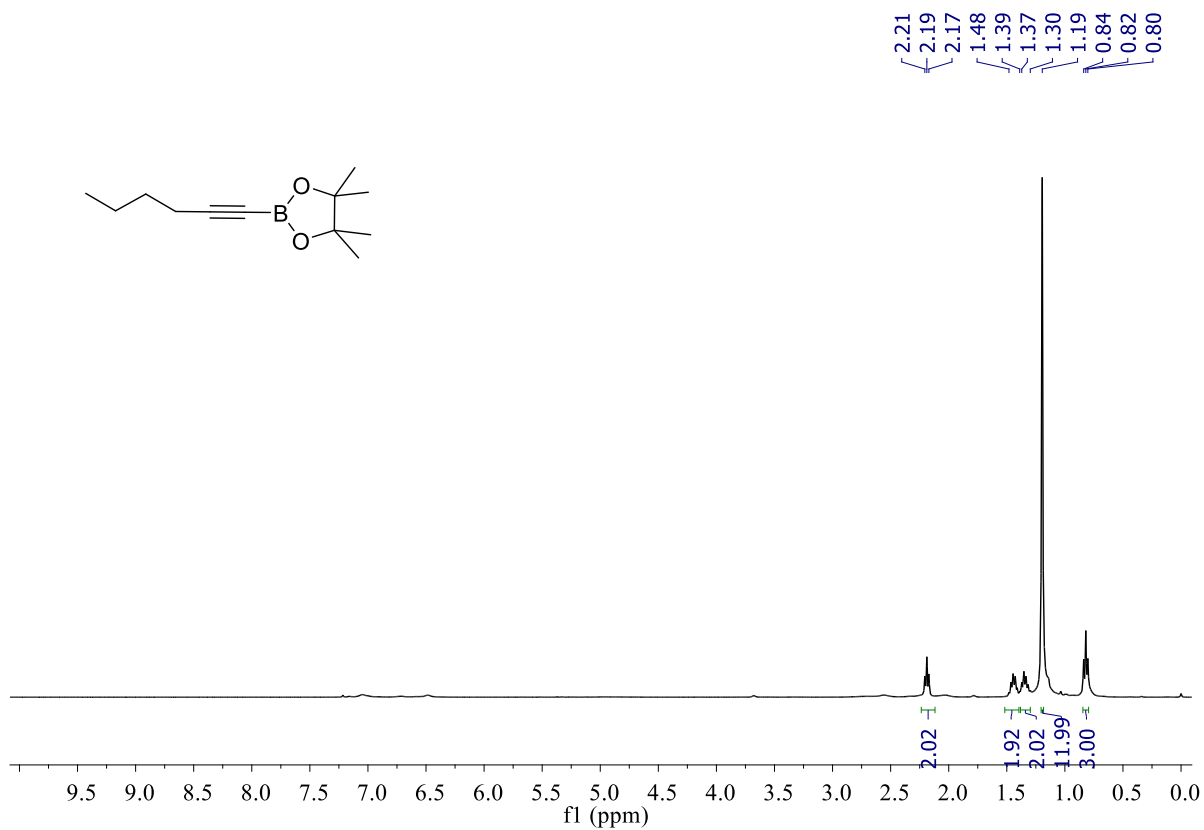

**Figure S116:**  $^1\text{H}$  NMR spectrum of compound **2t** (400 MHz,  $\text{CDCl}_3$ ).

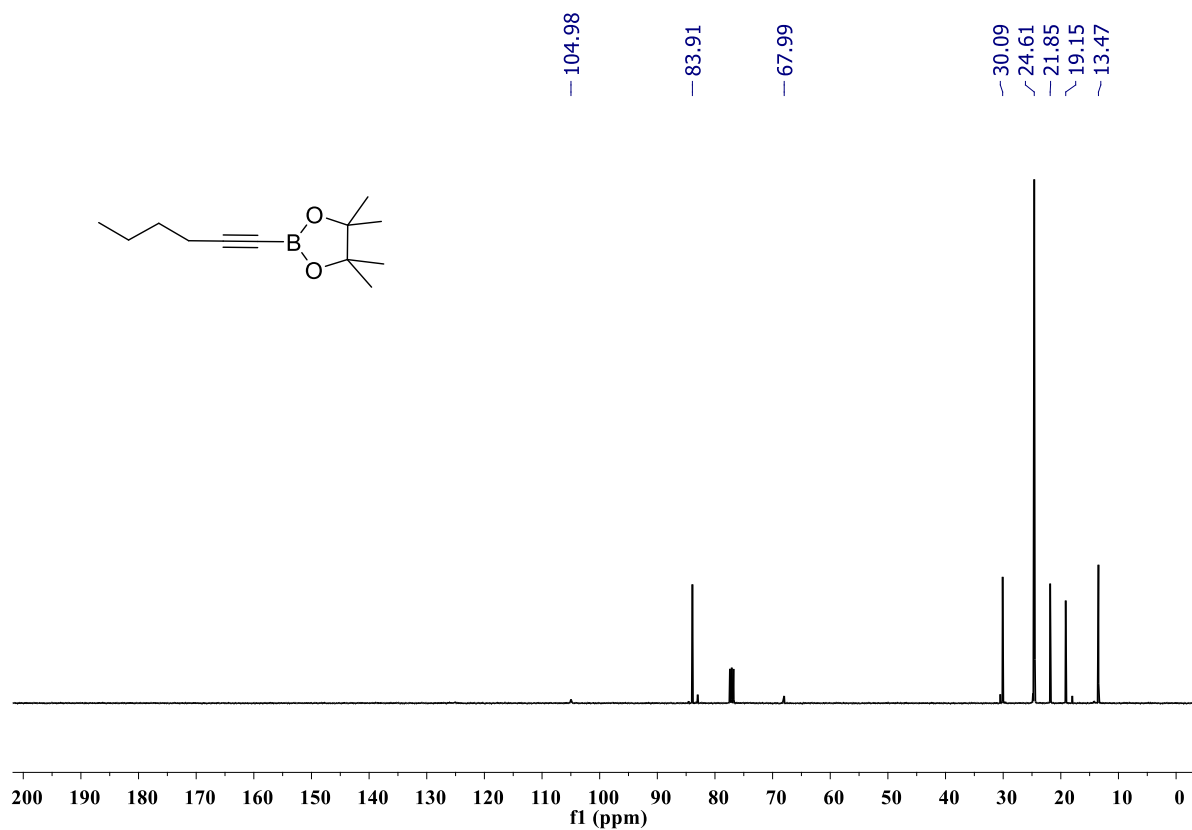

**Figure S117:**  $^{13}\text{C}\{^1\text{H}\}$  NMR spectrum of compound **2t** (100 MHz,  $\text{CDCl}_3$ ).

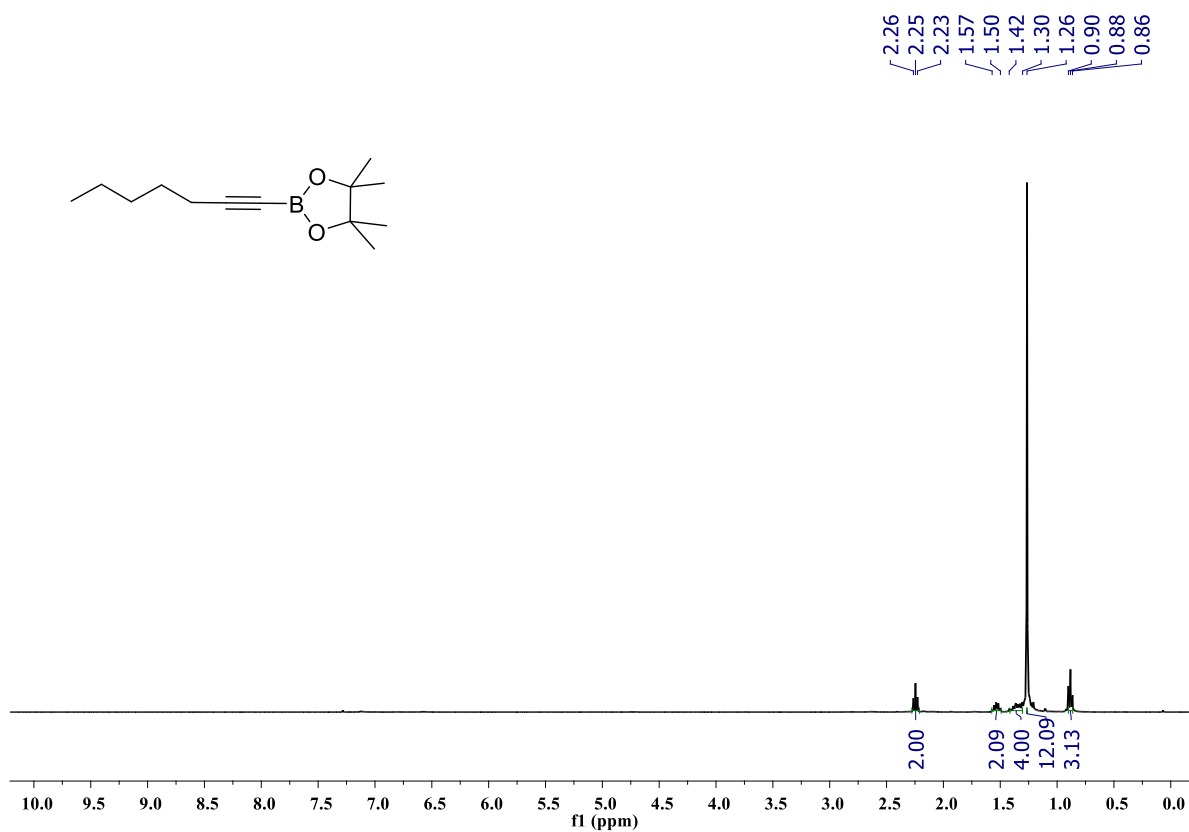

**Figure S118:**  $^1\text{H}$  NMR spectrum of compound **2u** (400 MHz,  $\text{CDCl}_3$ ).

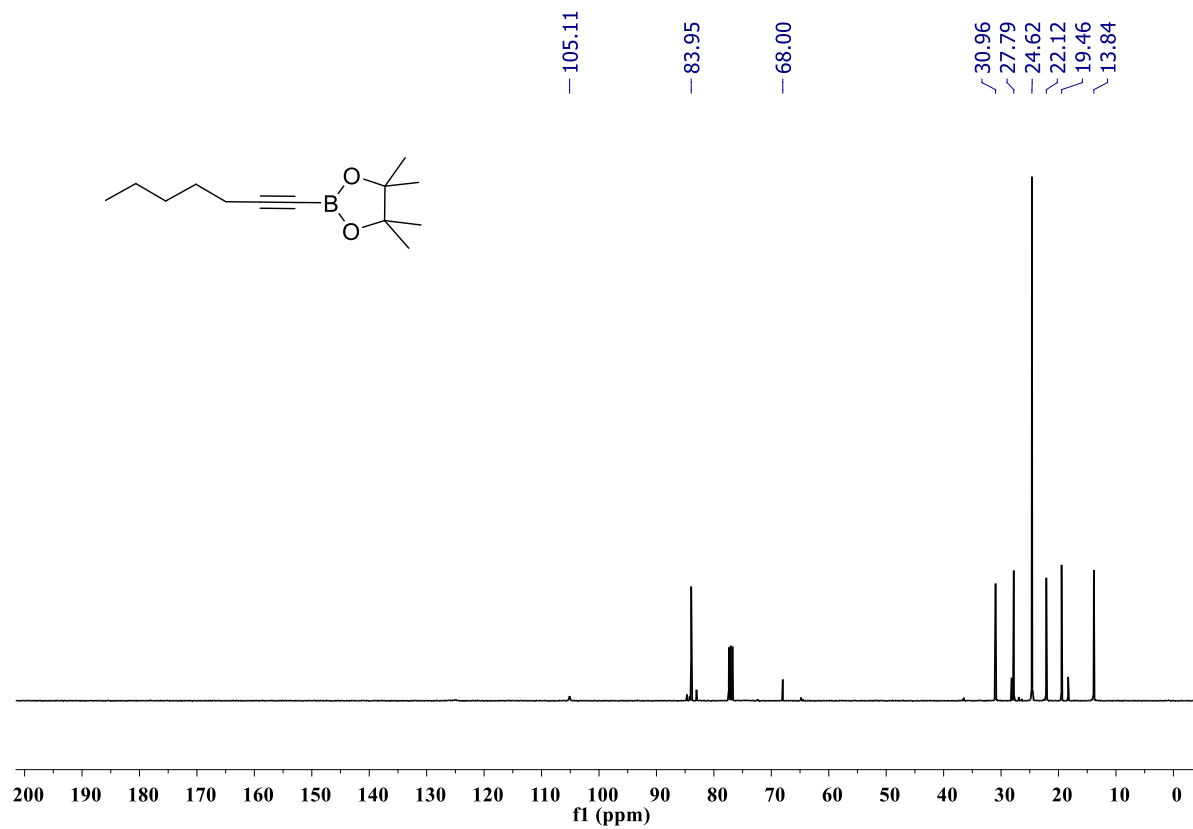

**Figure S119:**  $^{13}\text{C}\{^1\text{H}\}$  NMR spectrum of compound **2u** (100 MHz,  $\text{CDCl}_3$ ).

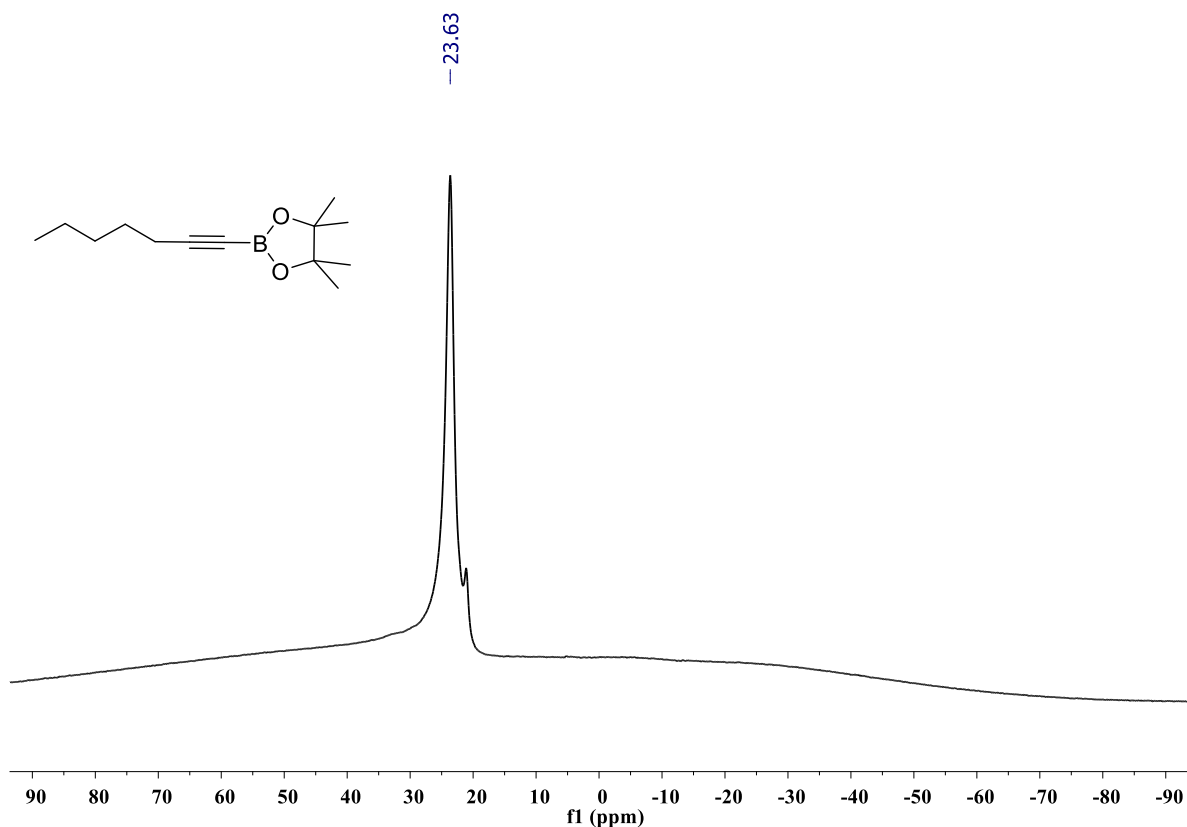

**Figure S120:**  $^{11}\text{B}$  NMR spectrum of compound **2u** (128 MHz,  $\text{CDCl}_3$ ).

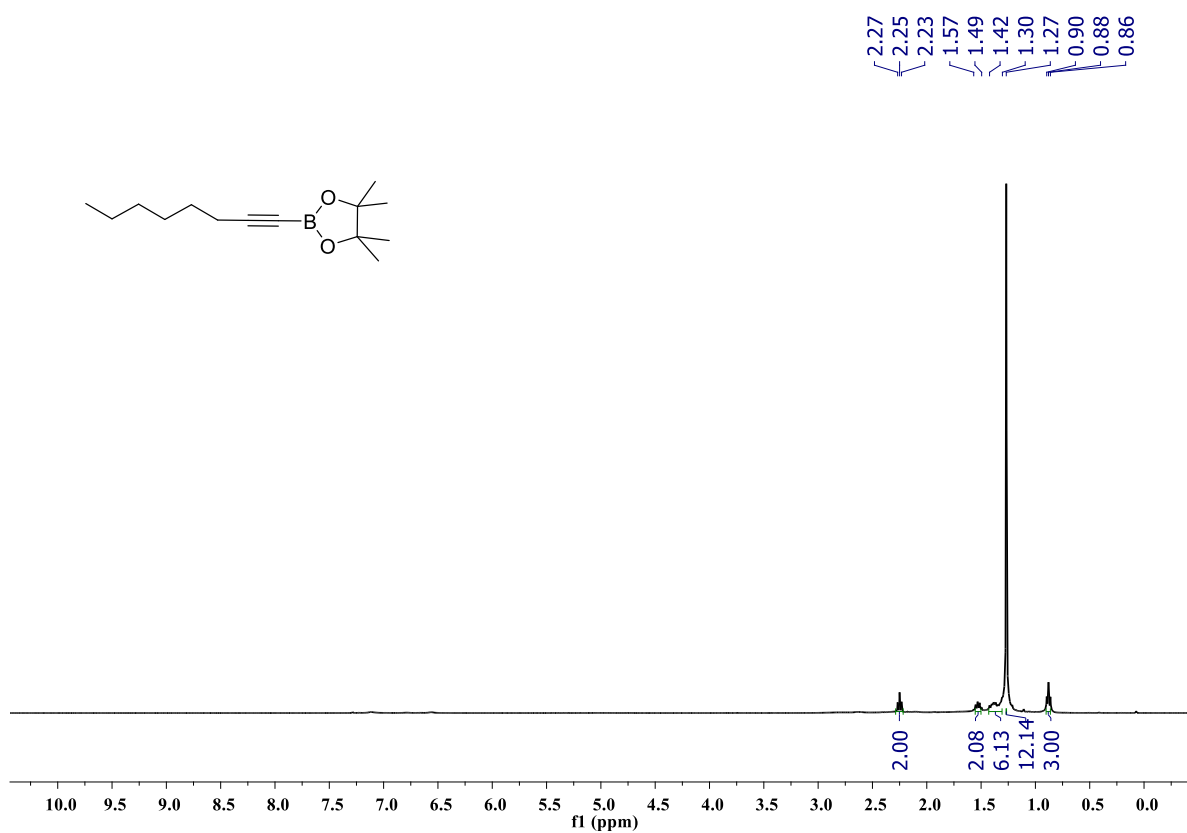

**Figure S121:**  $^1\text{H}$  NMR spectrum of compound **2v** (400 MHz,  $\text{CDCl}_3$ ).

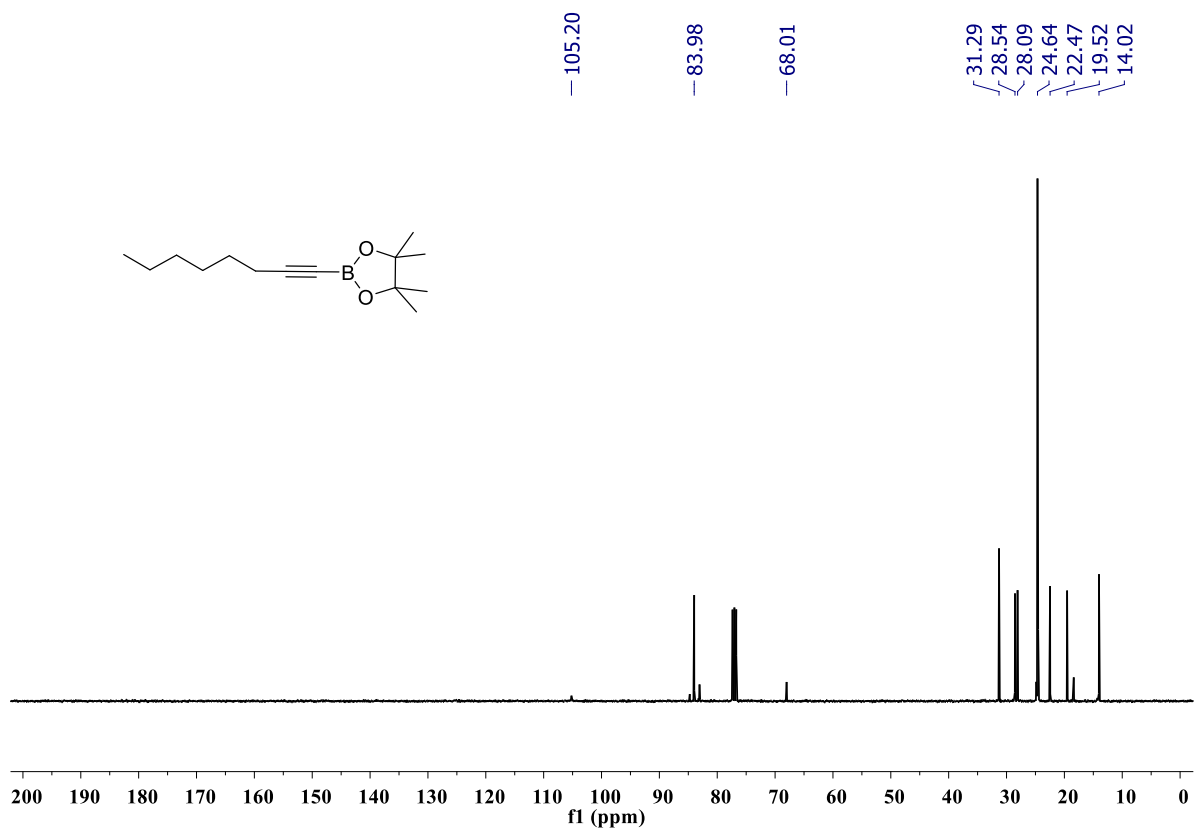

**Figure S122:**  $^{13}\text{C}\{^1\text{H}\}$  NMR spectrum of compound **2v** (100 MHz,  $\text{CDCl}_3$ ).

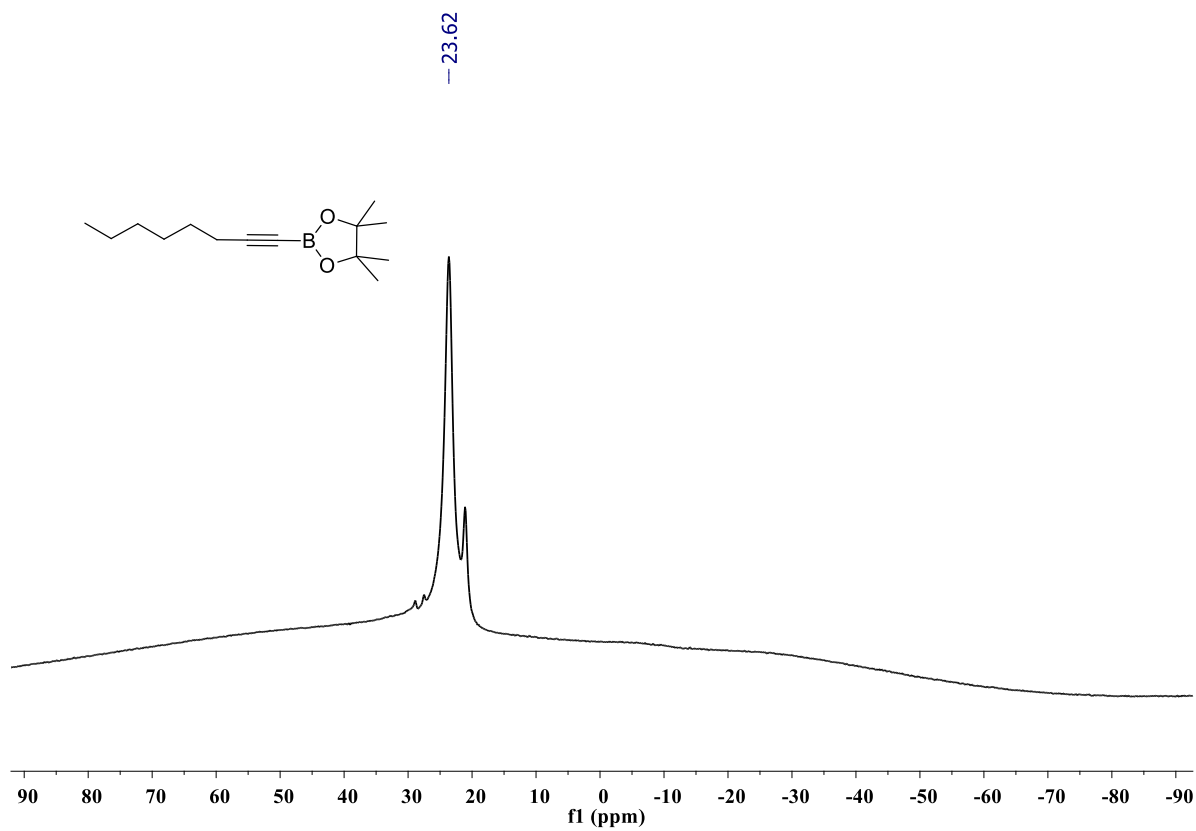

**Figure S123:**  $^{11}\text{B}$  NMR spectrum of compound **2v** (128 MHz,  $\text{CDCl}_3$ ).



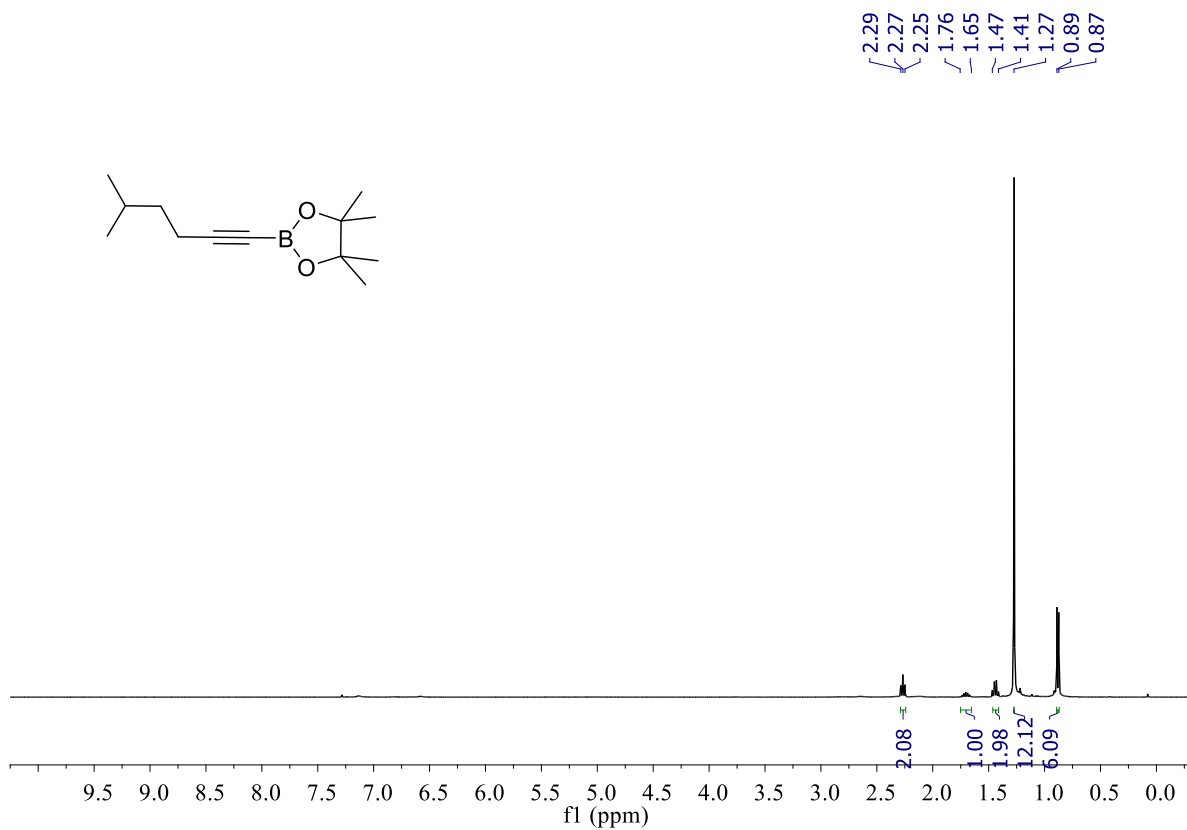

**Figure S124:**  $^1\text{H}$  NMR spectrum of compound **2w** (400 MHz,  $\text{CDCl}_3$ ).

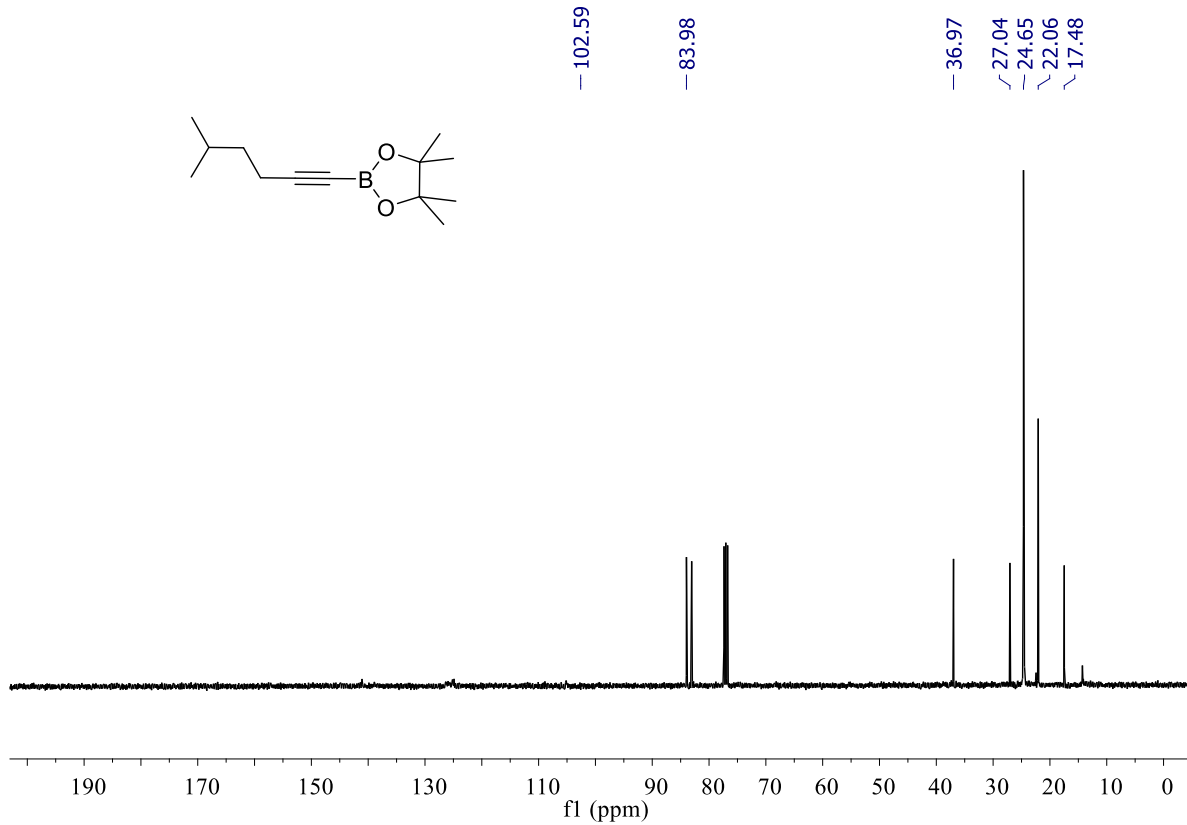

**Figure S125:**  $^{13}\text{C}\{^1\text{H}\}$  NMR spectrum of compound **2w** (100 MHz,  $\text{CDCl}_3$ ).

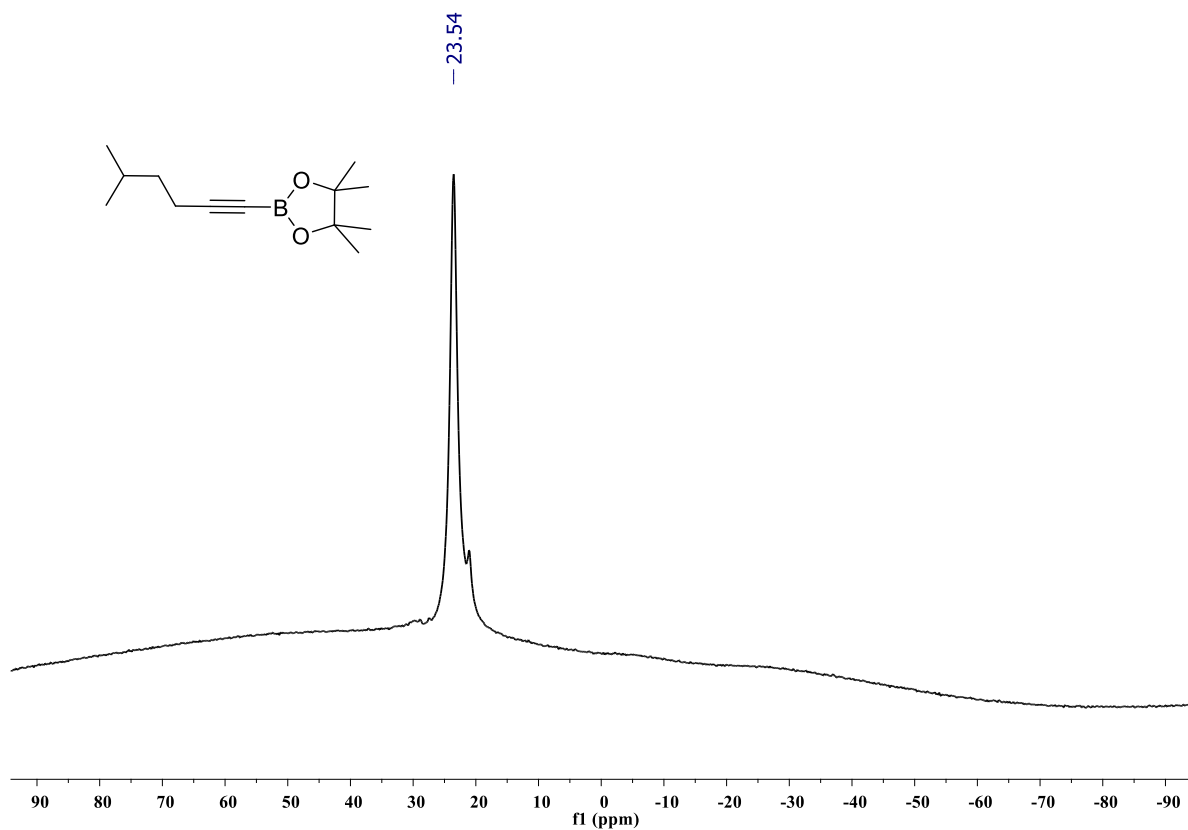

**Figure S126:**  $^{11}\text{B}$  NMR spectrum of compound **2w** (128 MHz,  $\text{CDCl}_3$ ).

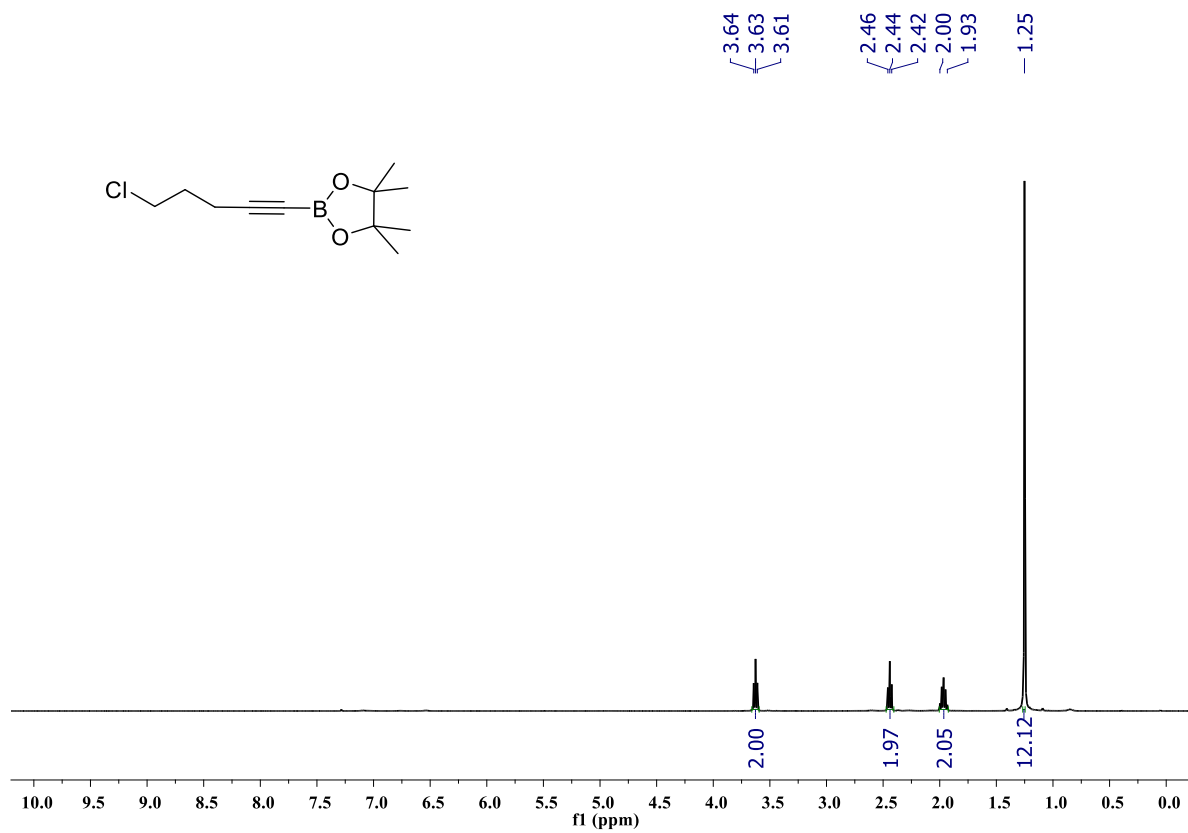

**Figure S127:**  $^1\text{H}$  NMR spectrum of compound **2x** (400 MHz,  $\text{CDCl}_3$ ).

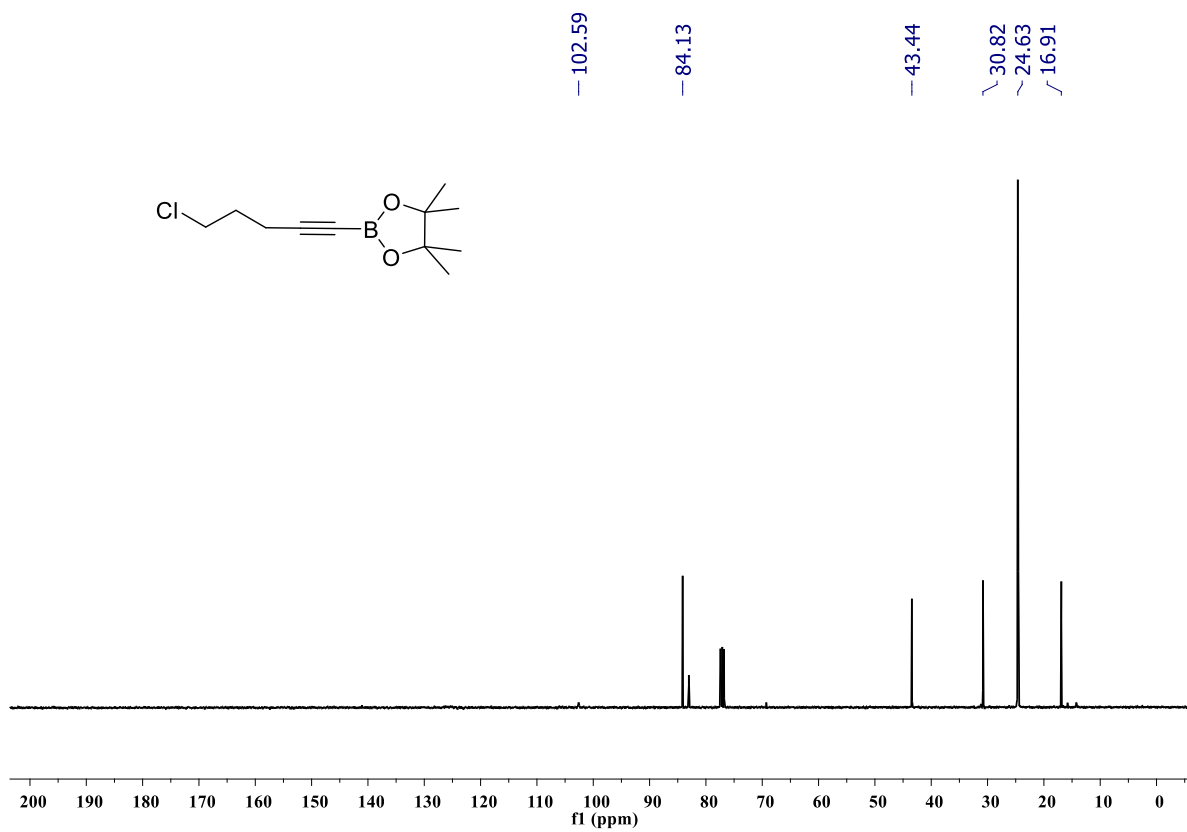

**Figure S128:**  $^{13}\text{C}\{^1\text{H}\}$  NMR spectrum of compound **2x** (100 MHz,  $\text{CDCl}_3$ ).

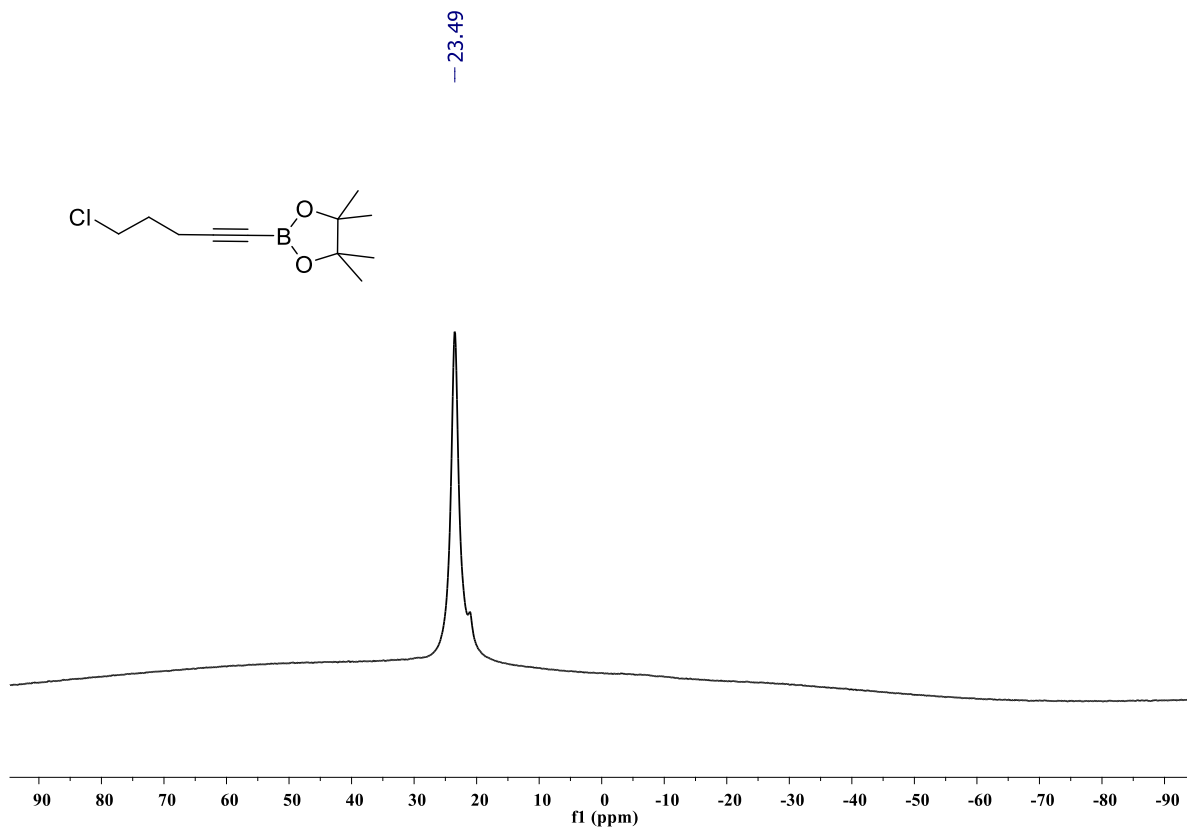

**Figure S129:**  $^{11}\text{B}$  NMR spectrum of compound **2x** (128 MHz,  $\text{CDCl}_3$ ).

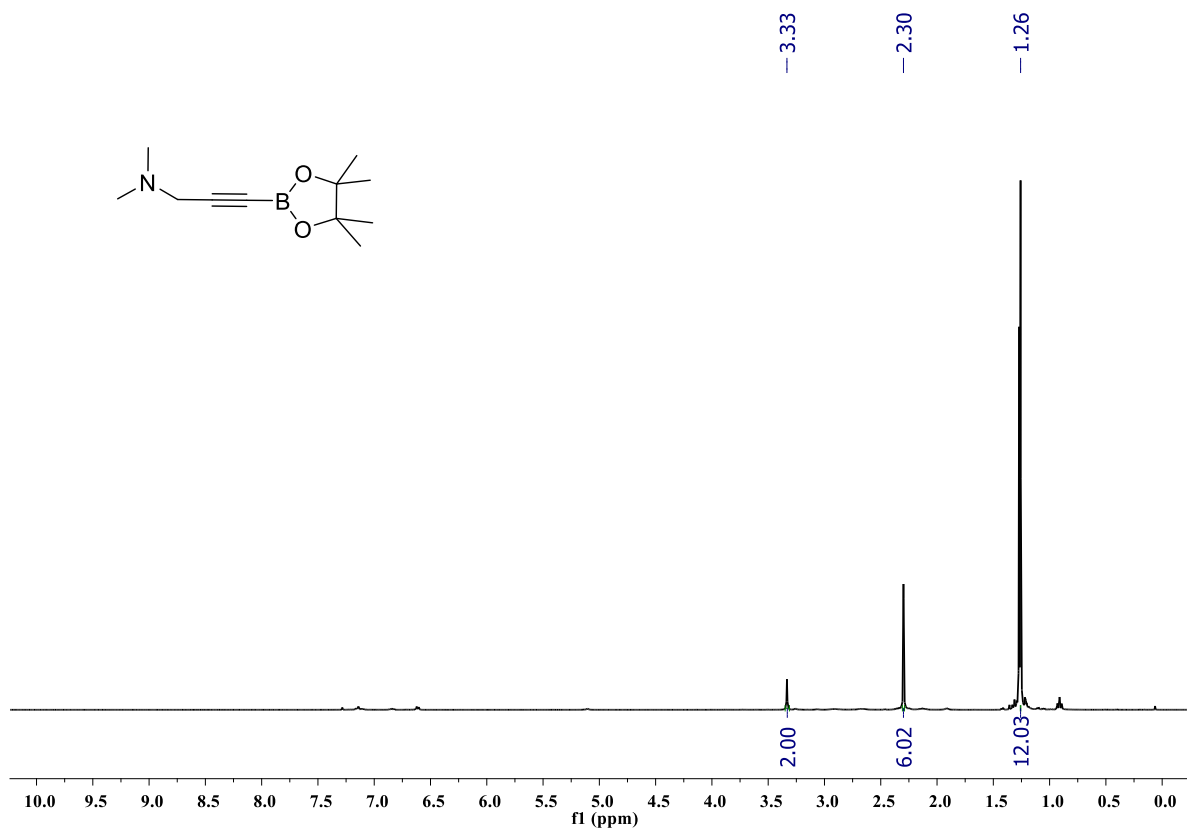

**Figure S130:** <sup>1</sup>H NMR spectrum of compound **2y** (400 MHz, CDCl<sub>3</sub>).

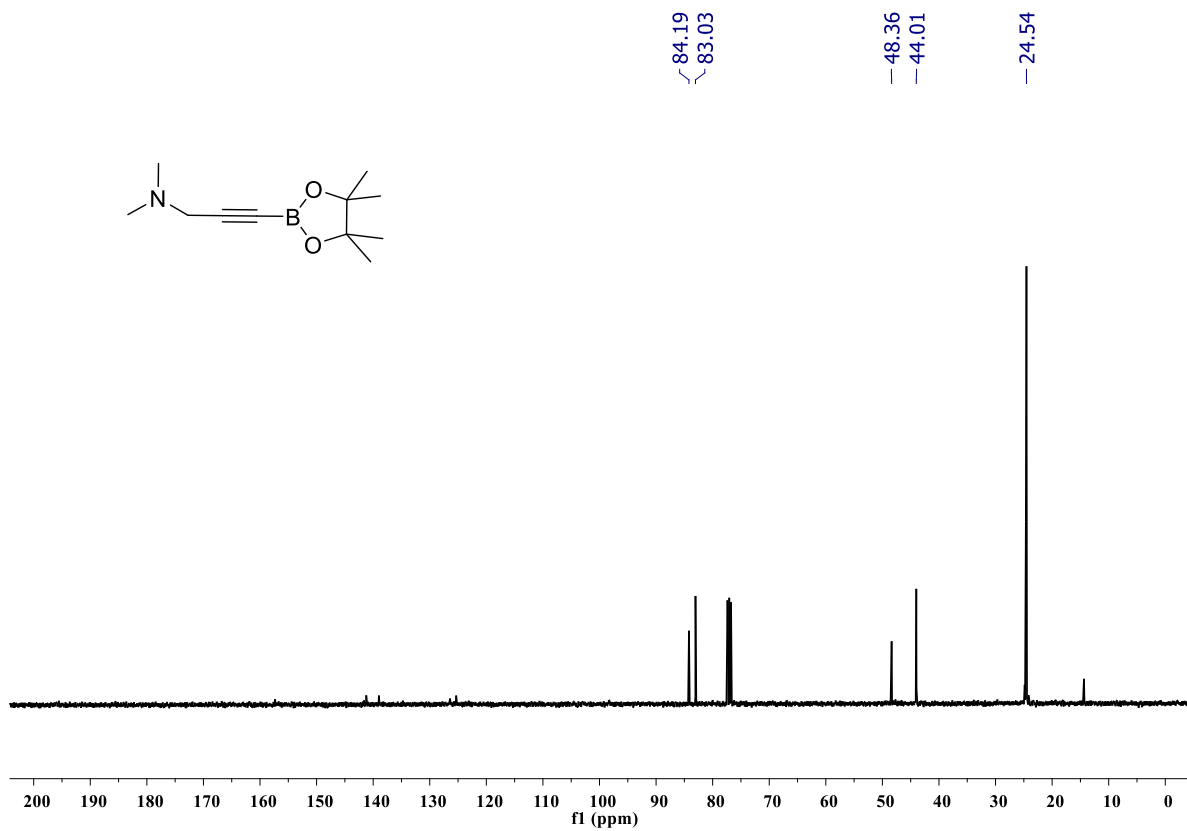

**Figure S131:** <sup>13</sup>C{<sup>1</sup>H} NMR spectrum of compound **2y** (100 MHz, CDCl<sub>3</sub>).

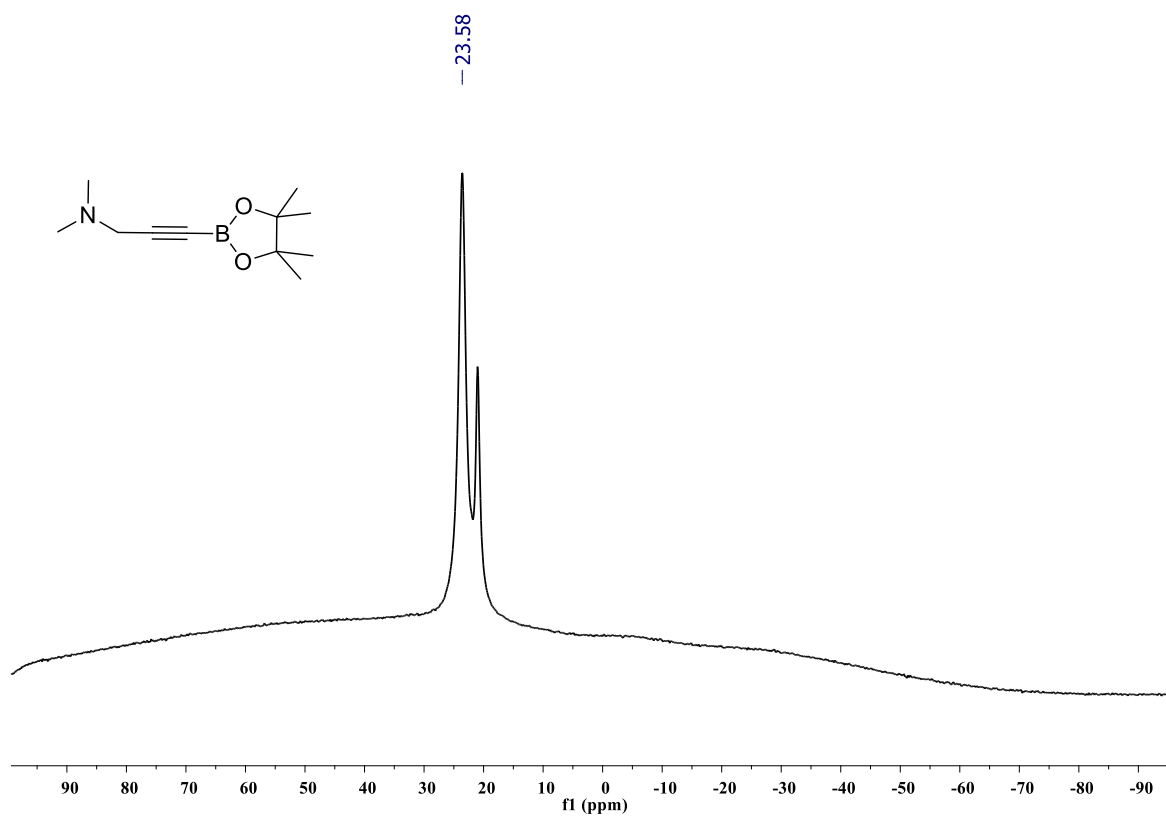

**Figure S132:**  $^{11}\text{B}$  NMR spectrum of compound **2y** (128 MHz,  $\text{CDCl}_3$ ).

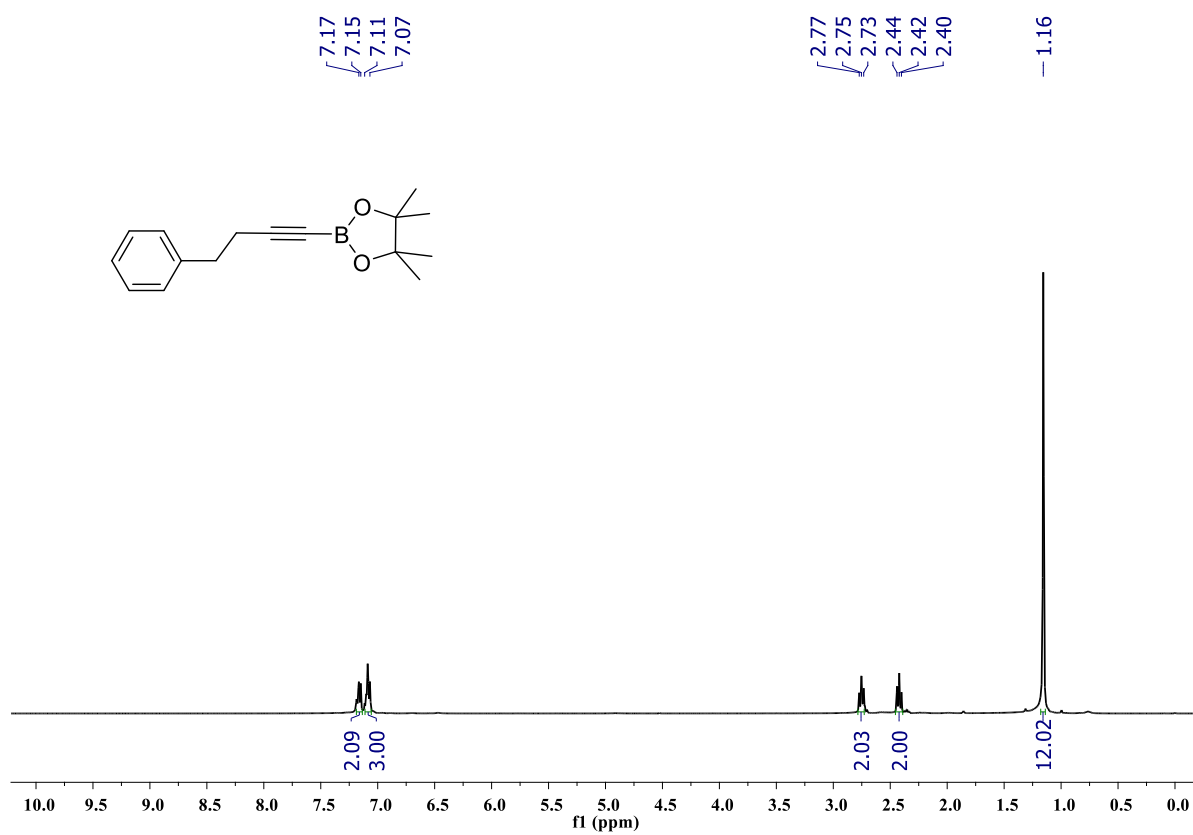

**Figure S133:**  $^1\text{H}$  NMR spectrum of compound **2z** (400 MHz,  $\text{CDCl}_3$ ).

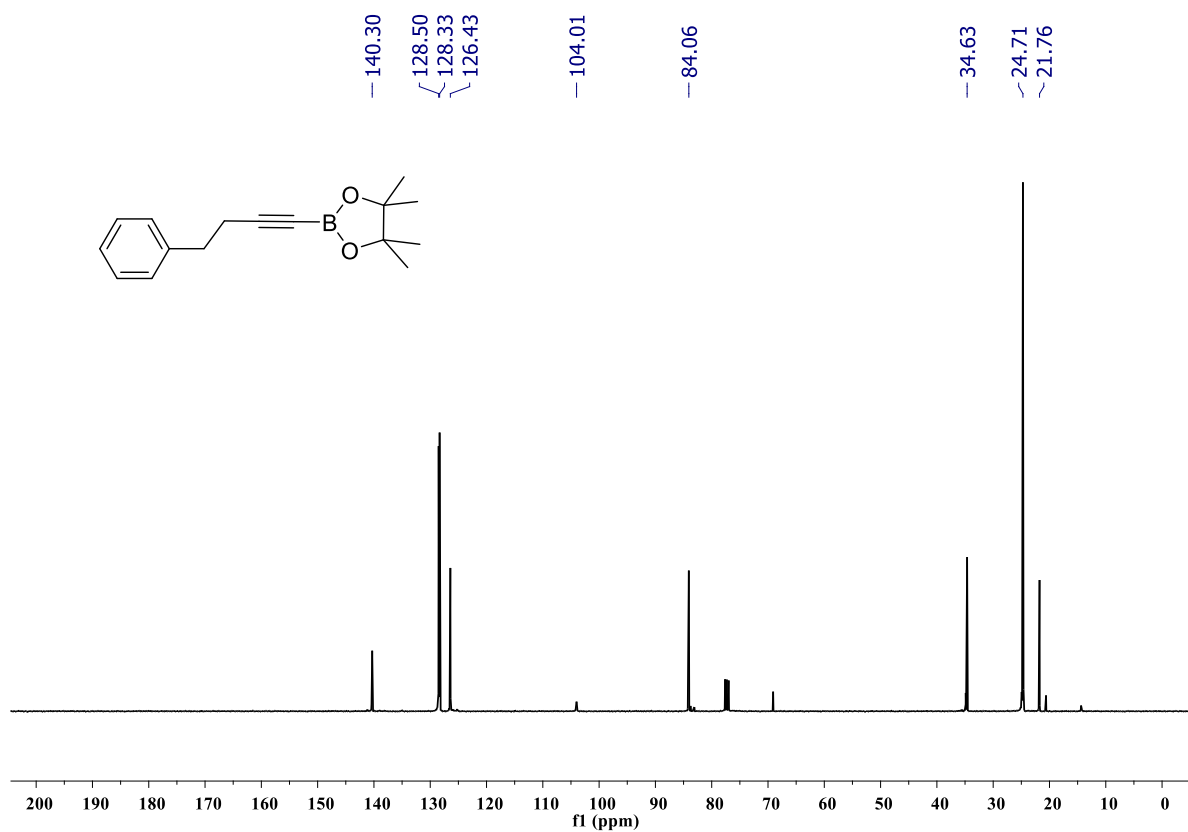

**Figure S134:**  $^{13}\text{C}\{^1\text{H}\}$  NMR spectrum of compound **2z** (100 MHz,  $\text{CDCl}_3$ ).

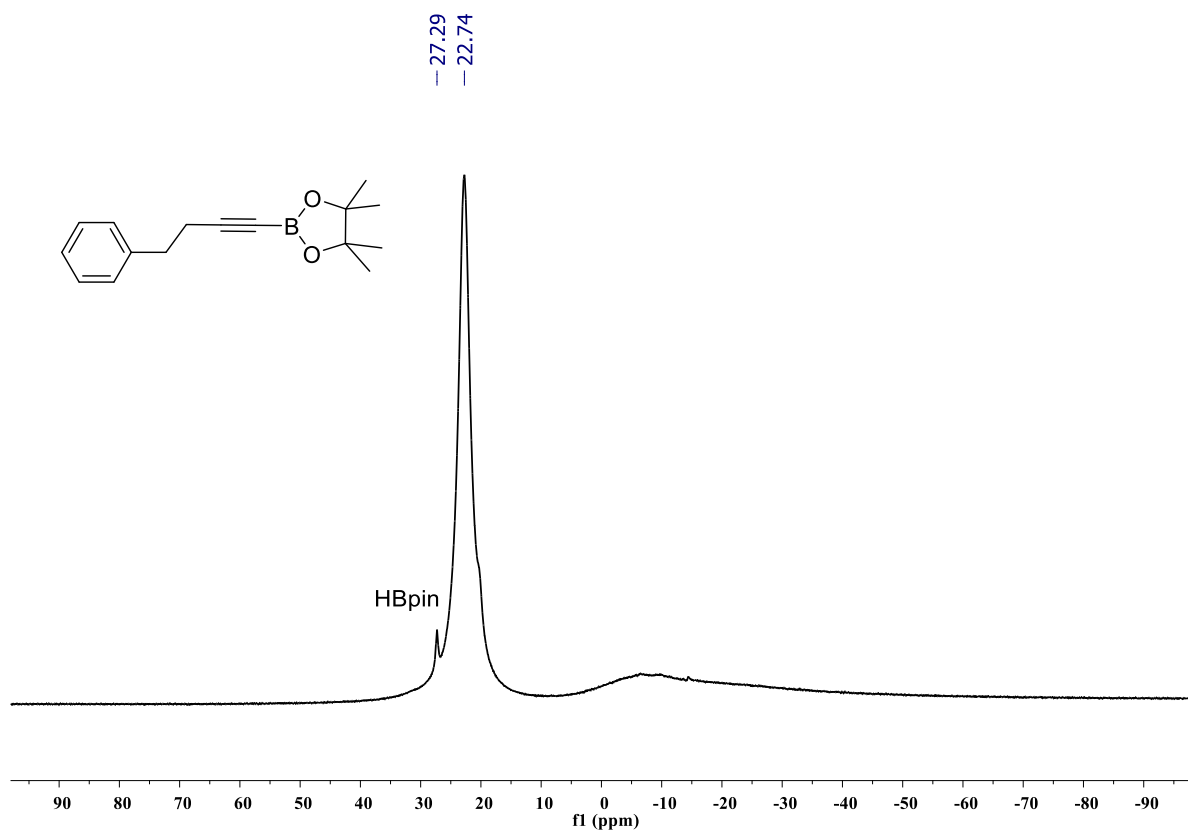

**Figure S135:**  $^{11}\text{B}\{^1\text{H}\}$  NMR spectrum of compound **2z** (128 MHz,  $\text{CDCl}_3$ ).

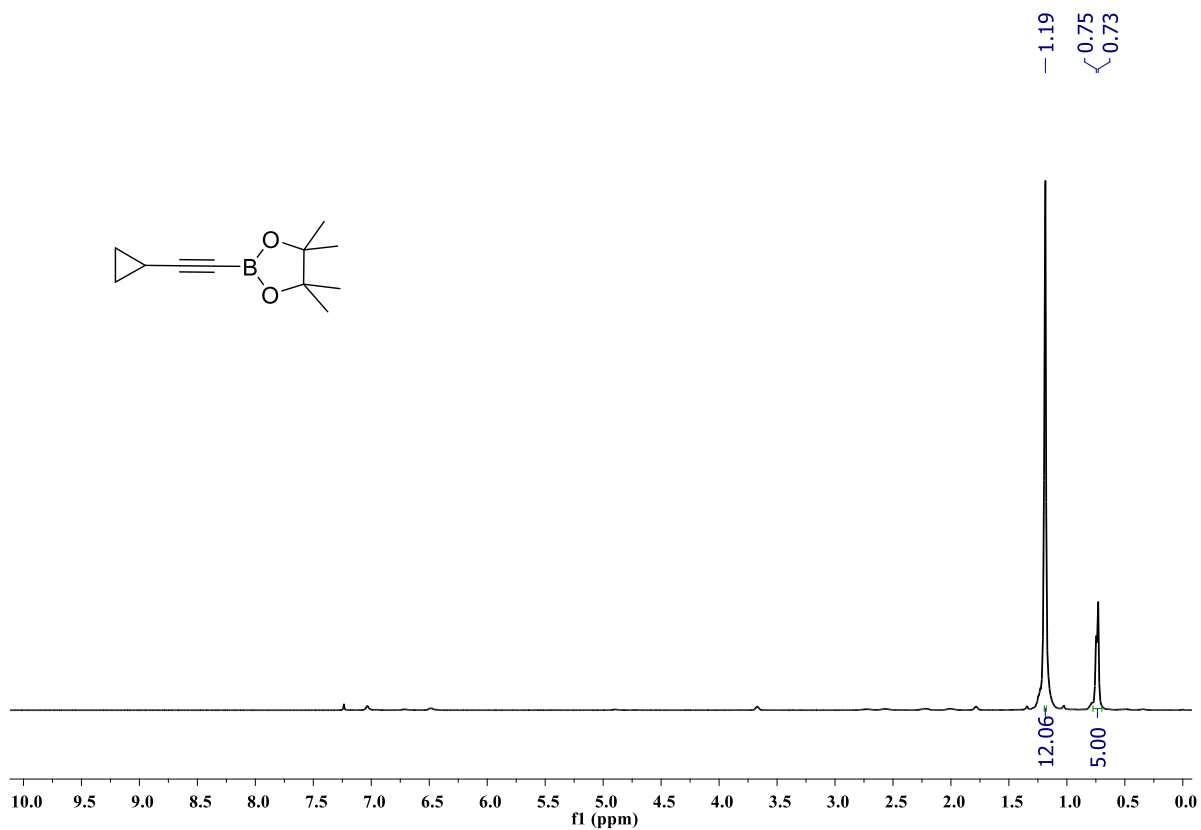

**Figure S136:**  $^1\text{H}$  NMR spectrum of compound **2aa** (400 MHz,  $\text{CDCl}_3$ ).

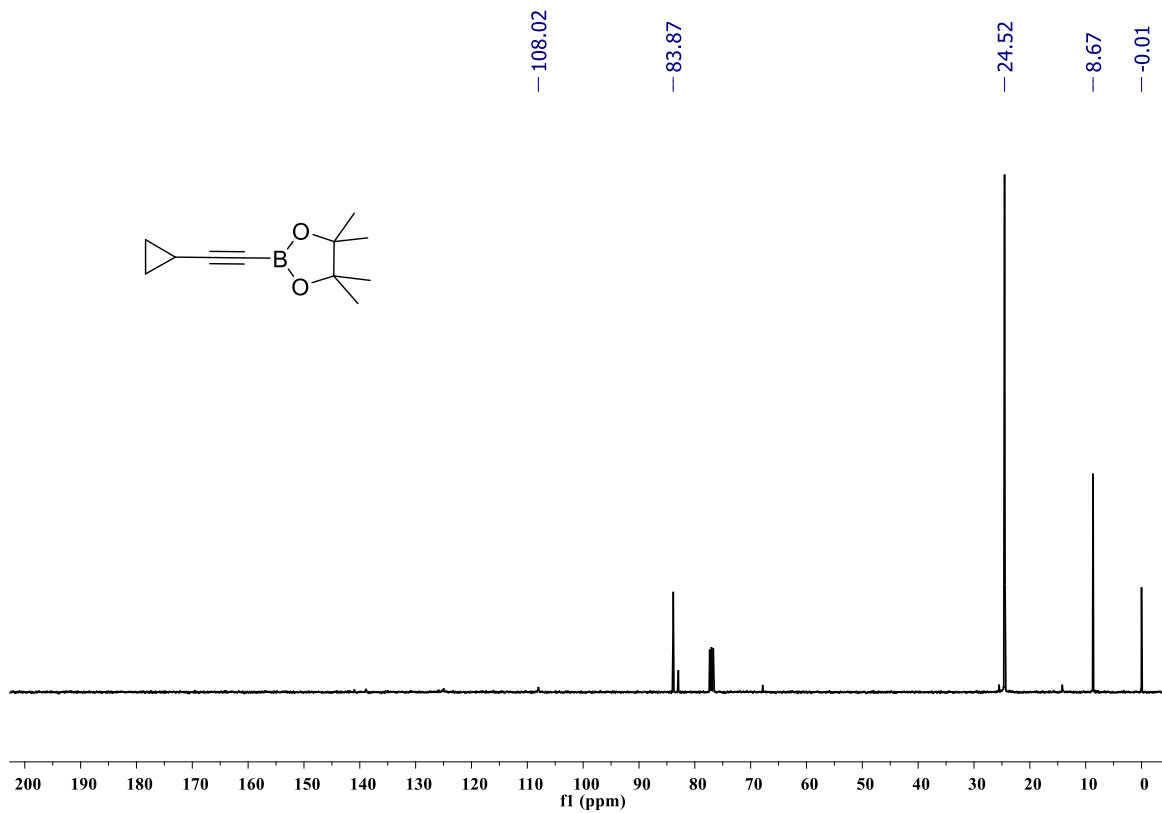

**Figure S137:**  $^{13}\text{C}\{^1\text{H}\}$  NMR spectrum of compound **2aa** (100 MHz,  $\text{CDCl}_3$ ).

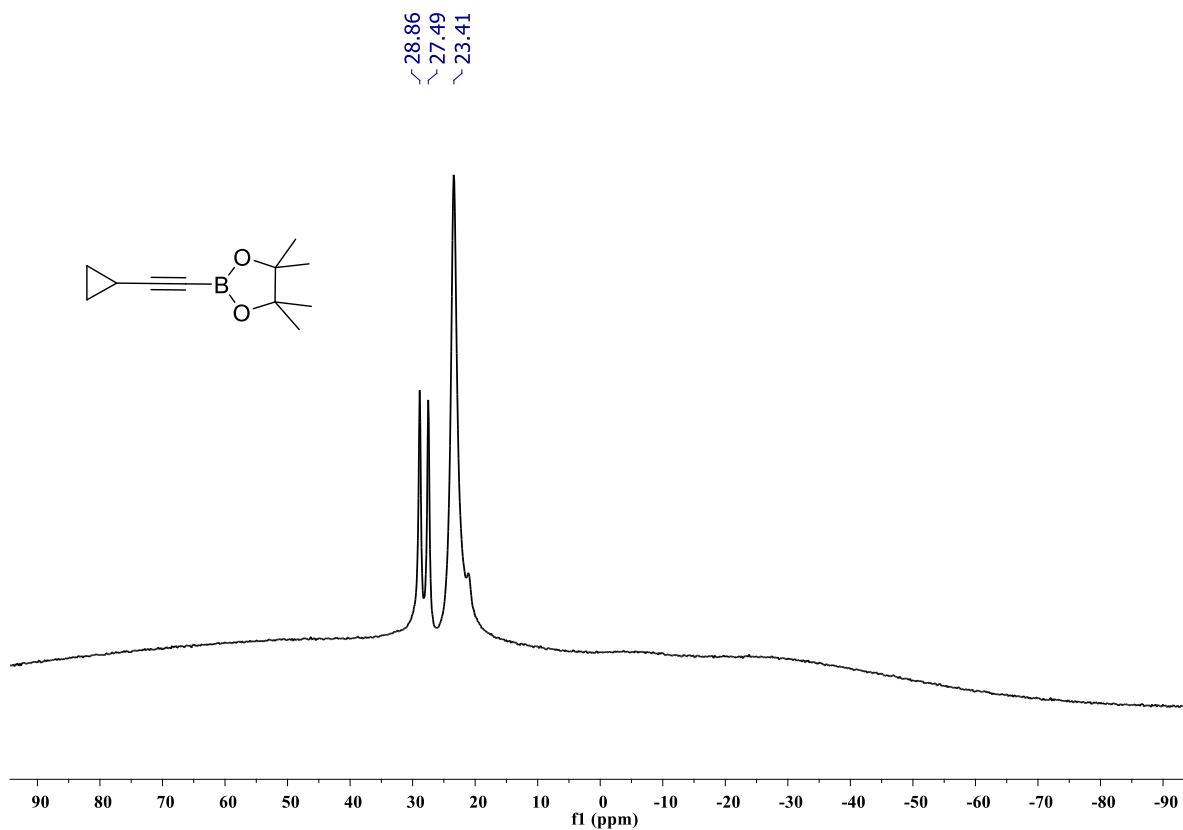

**Figure S138:**  $^{11}\text{B}$  NMR spectrum of compound **2aa** (128 MHz,  $\text{CDCl}_3$ ). A doublet peak at  $\delta$  27.49-28.86 ppm arises from free HBpin.

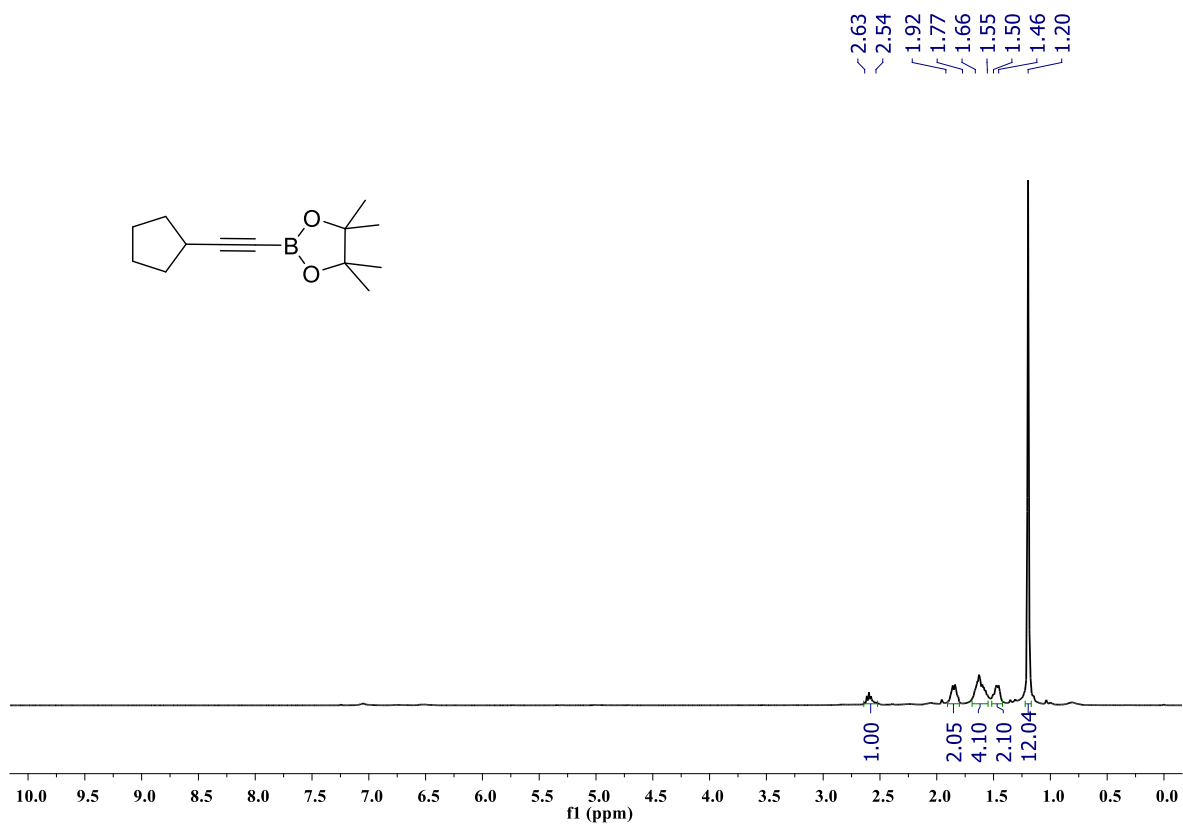

**Figure S139:**  $^1\text{H}$  NMR spectrum of compound **2ab** (400 MHz,  $\text{CDCl}_3$ ).



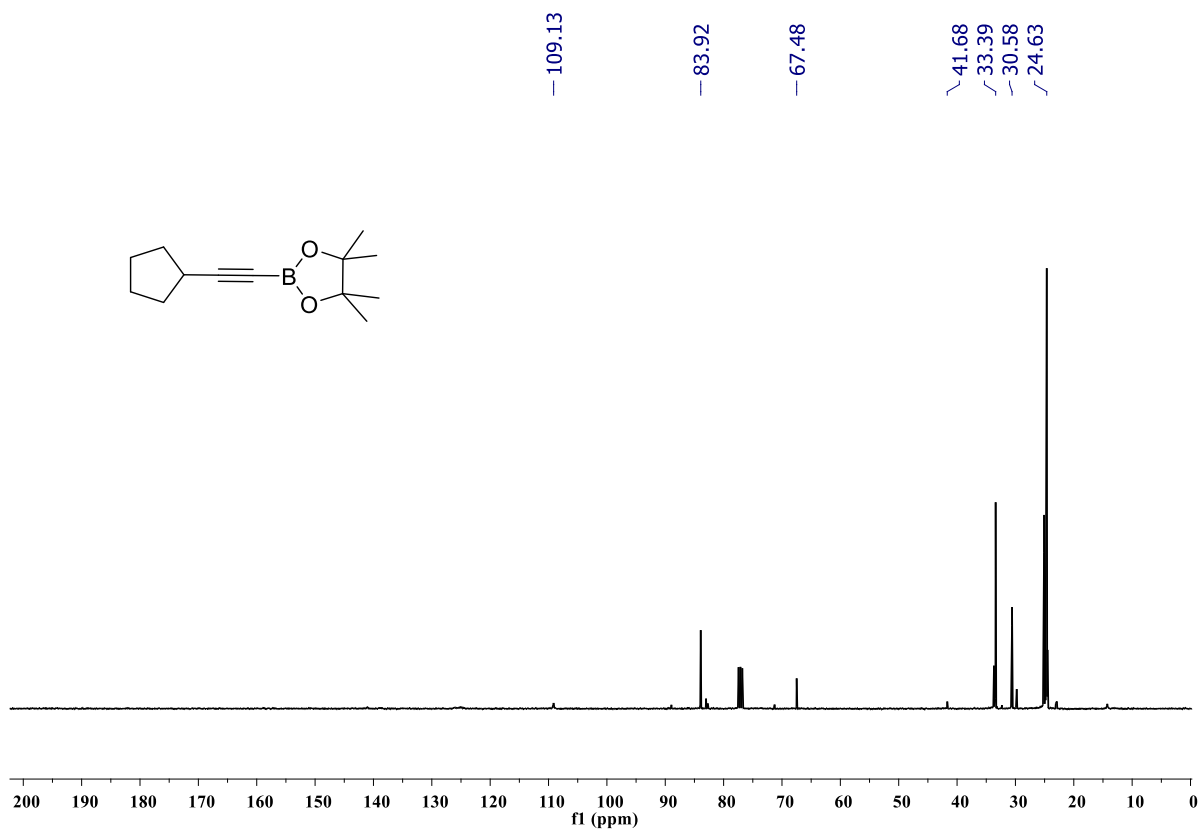

**Figure S140:**  $^{13}\text{C}\{^1\text{H}\}$  NMR spectrum of compound **2ab** (100 MHz,  $\text{CDCl}_3$ ).

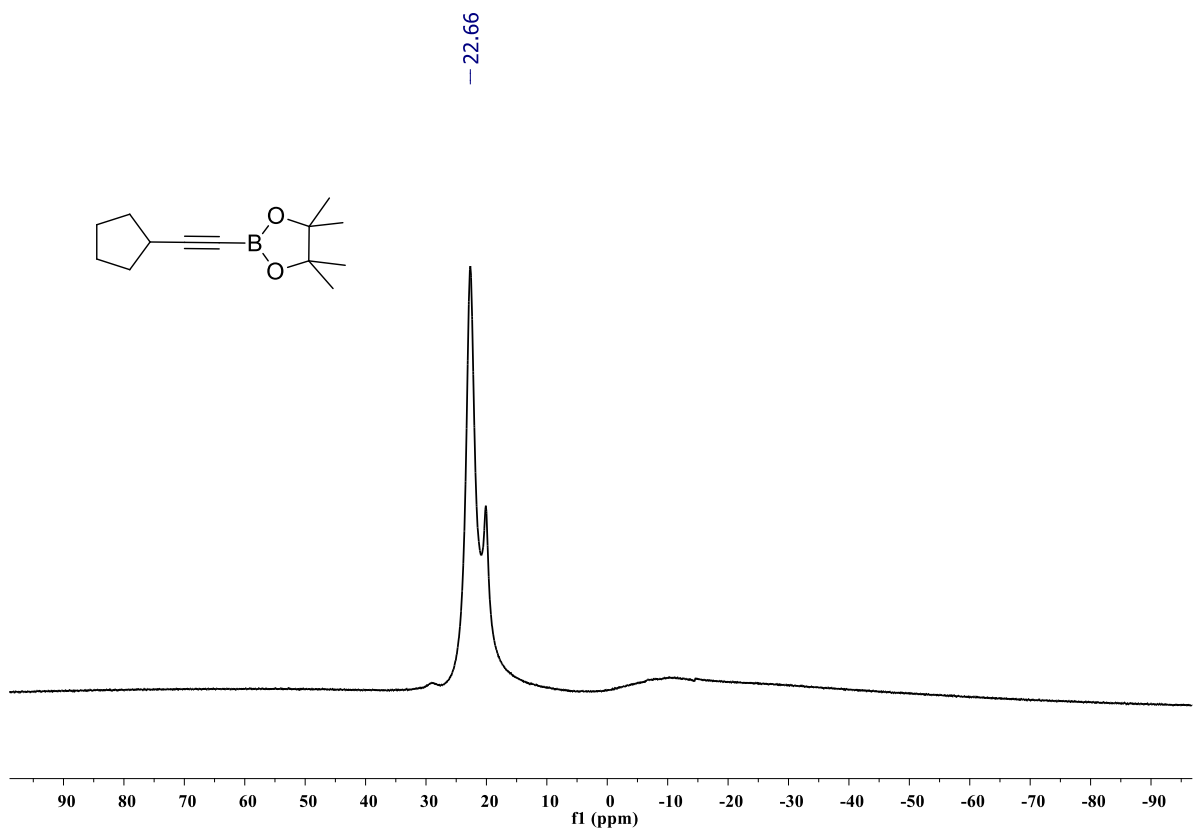

**Figure S141:**  $^{11}\text{B}$  NMR spectrum of compound **2ab** (128 MHz,  $\text{CDCl}_3$ ).

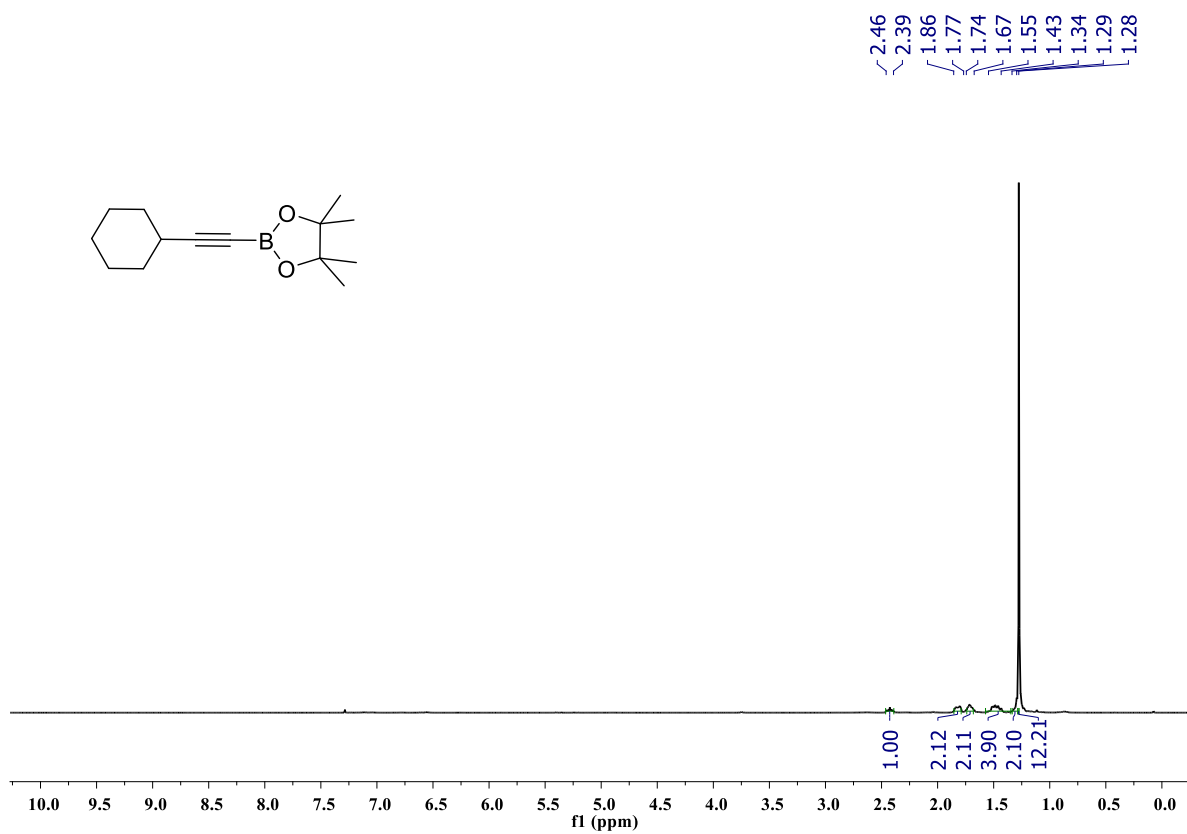

**Figure S142:**  $^1\text{H}$  NMR spectrum of compound **2ac** (400 MHz,  $\text{CDCl}_3$ ).

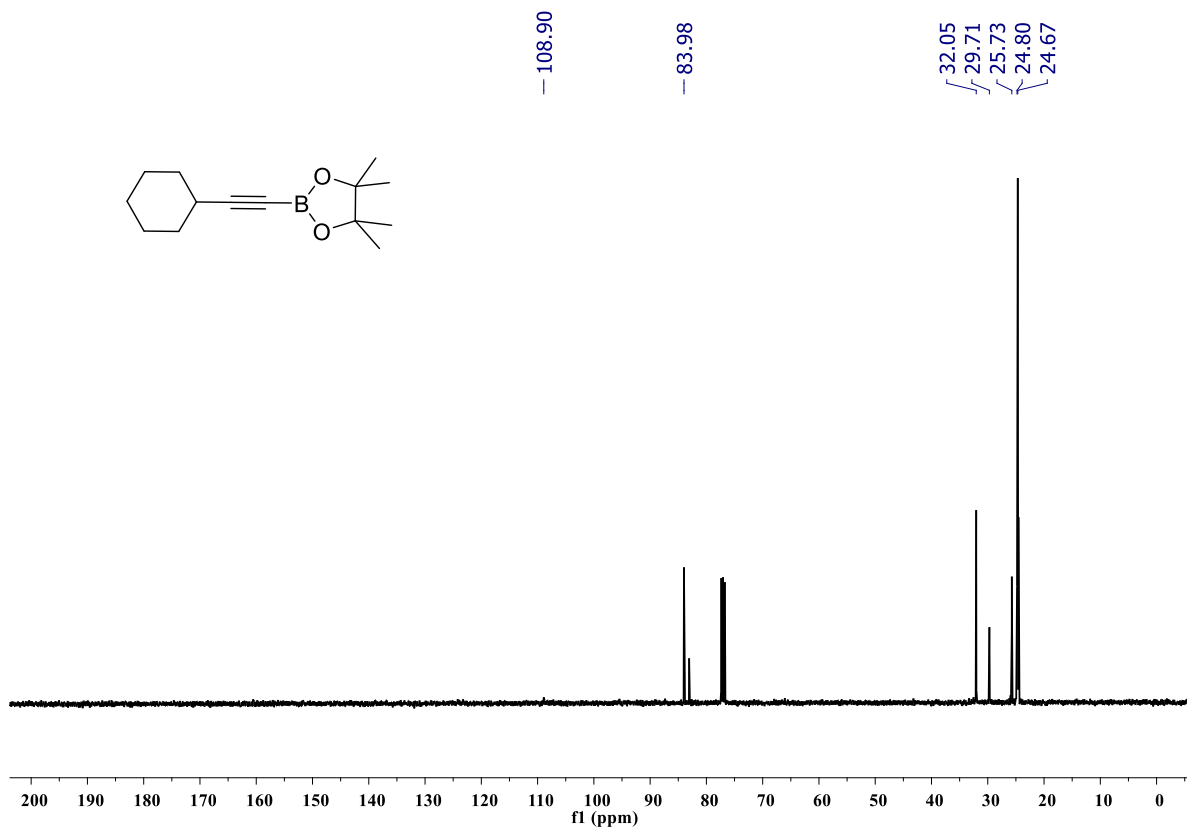

**Figure S143:**  $^{13}\text{C}\{^1\text{H}\}$  NMR spectrum of compound **2ac** (100 MHz,  $\text{CDCl}_3$ ).

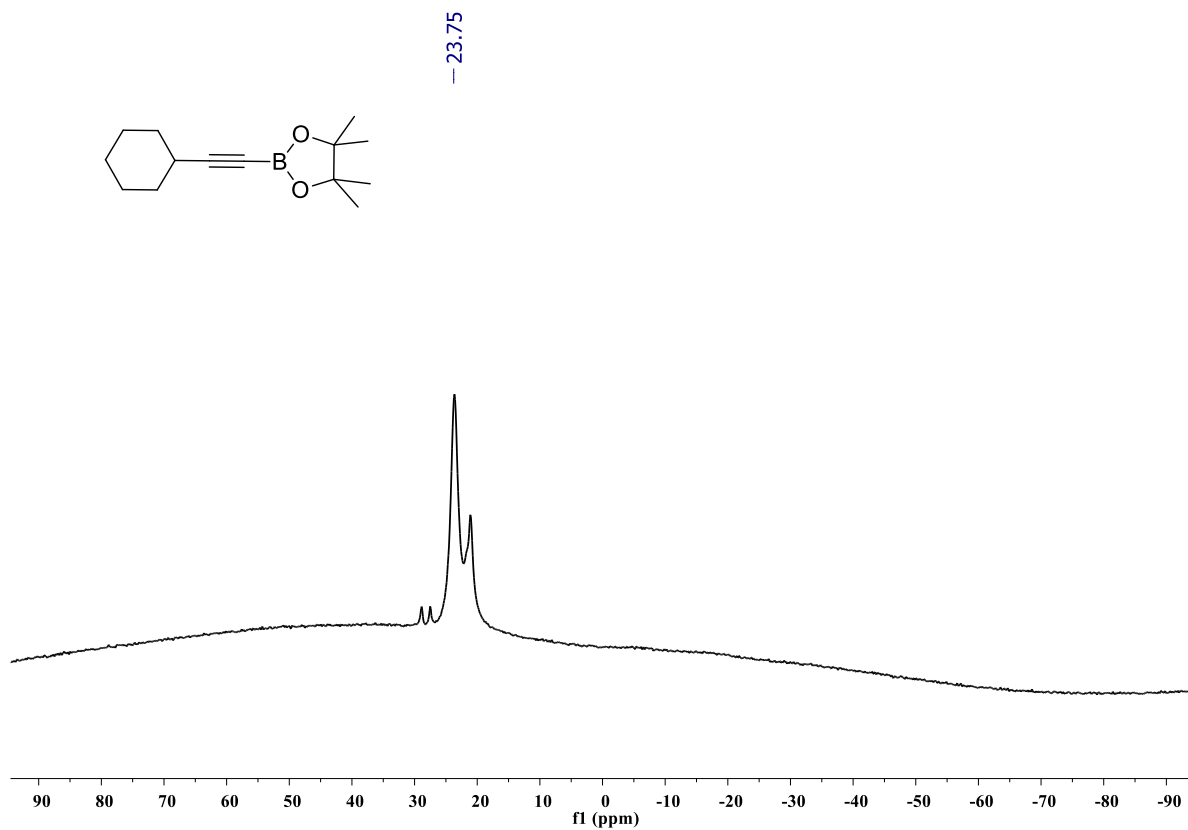

**Figure S144:**  $^{11}\text{B}\{^1\text{H}\}$  NMR spectrum of compound **2ac** (128 MHz,  $\text{CDCl}_3$ ).

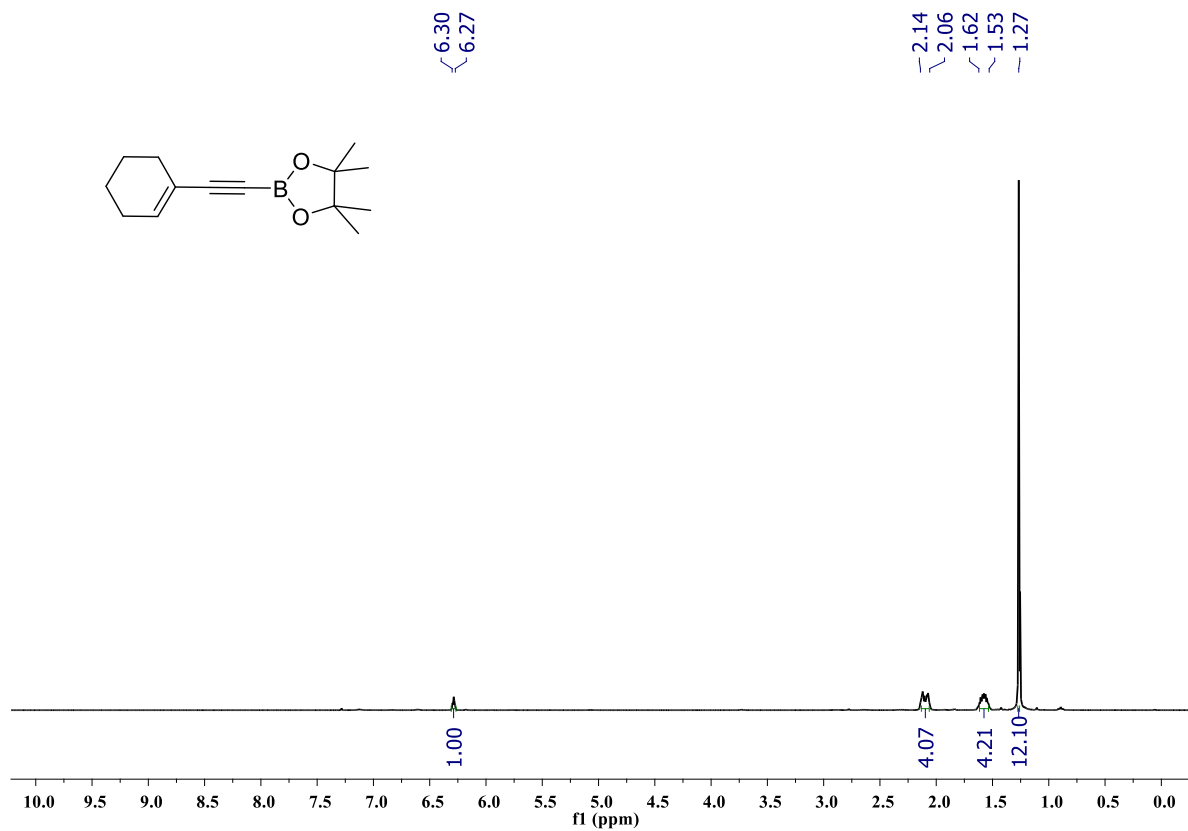

**Figure S145:**  $^1\text{H}$  NMR spectrum of compound **2ad** (400 MHz,  $\text{CDCl}_3$ ).

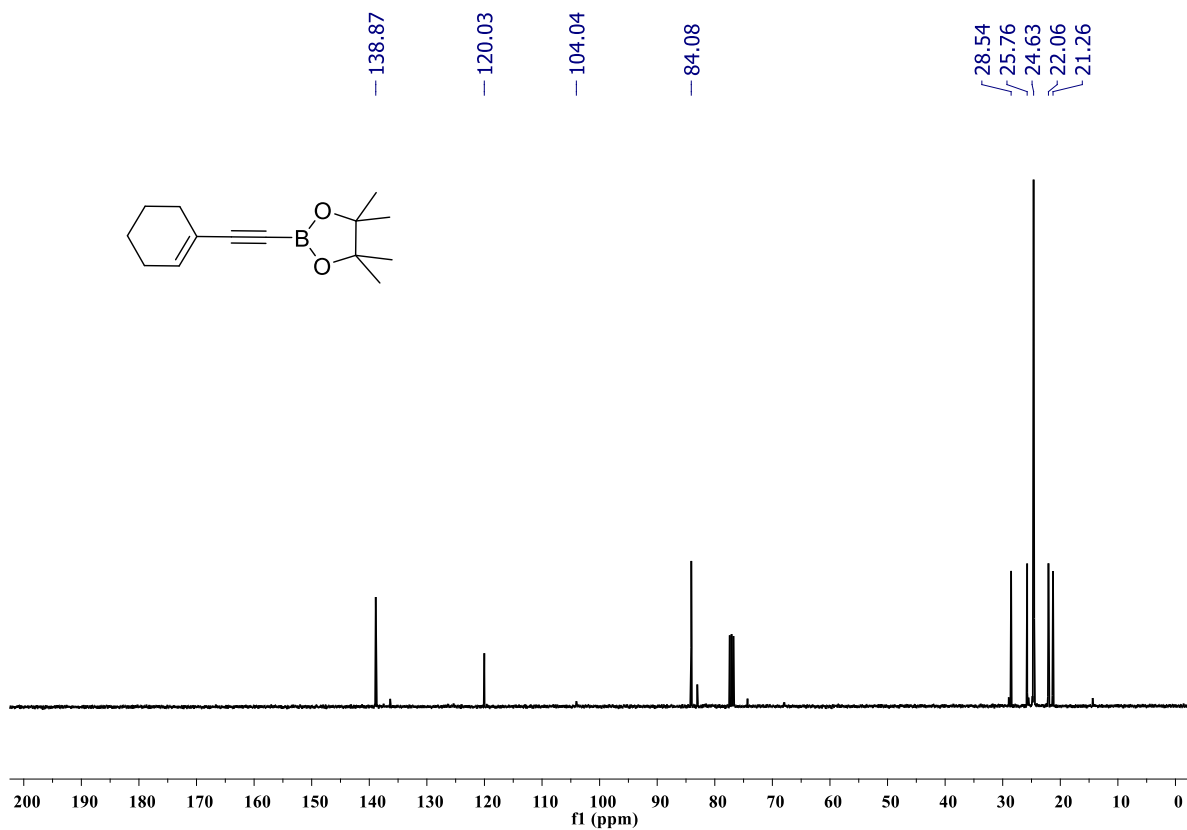

**Figure S146:**  $^{13}\text{C}\{^1\text{H}\}$  NMR spectrum of compound **2ad** (100 MHz,  $\text{CDCl}_3$ ).

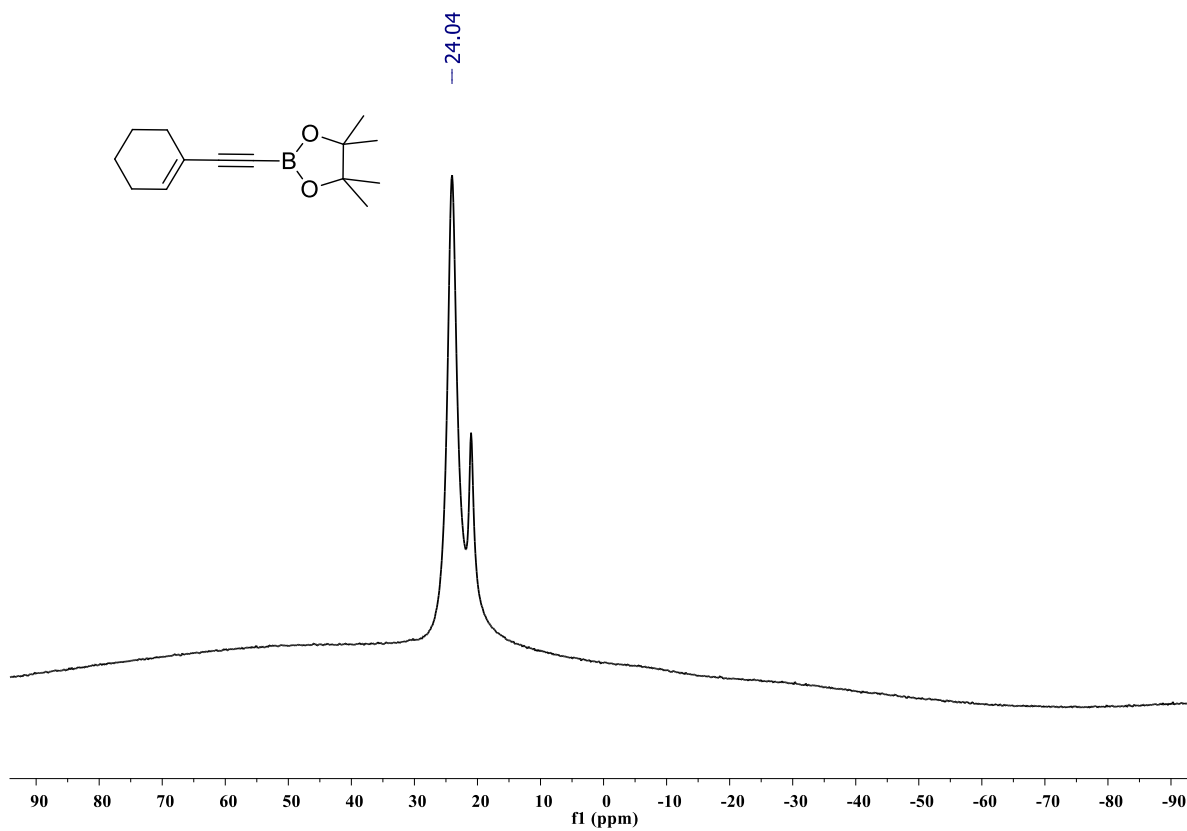

**Figure S147:**  $^{11}\text{B}$  NMR spectrum of compound **2ad** (128 MHz,  $\text{CDCl}_3$ ).

# $^1\text{H}$ , $^{13}\text{C}\{^1\text{H}\}$ and $^{11}\text{B}$ NMR Spectra of Intermolecular Chemoselective Reactions

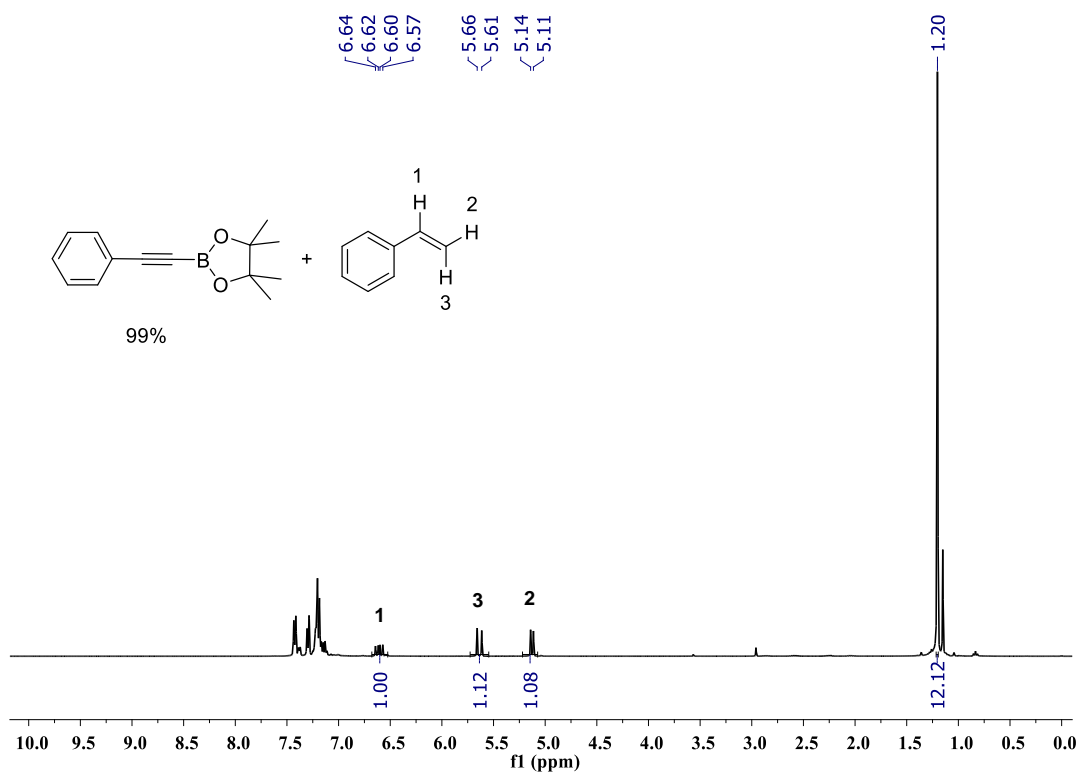

**Figure S148:**  $^1\text{H}$  NMR spectrum of compound **2a** and unreacted styrene (400 MHz,  $\text{CDCl}_3$ ).

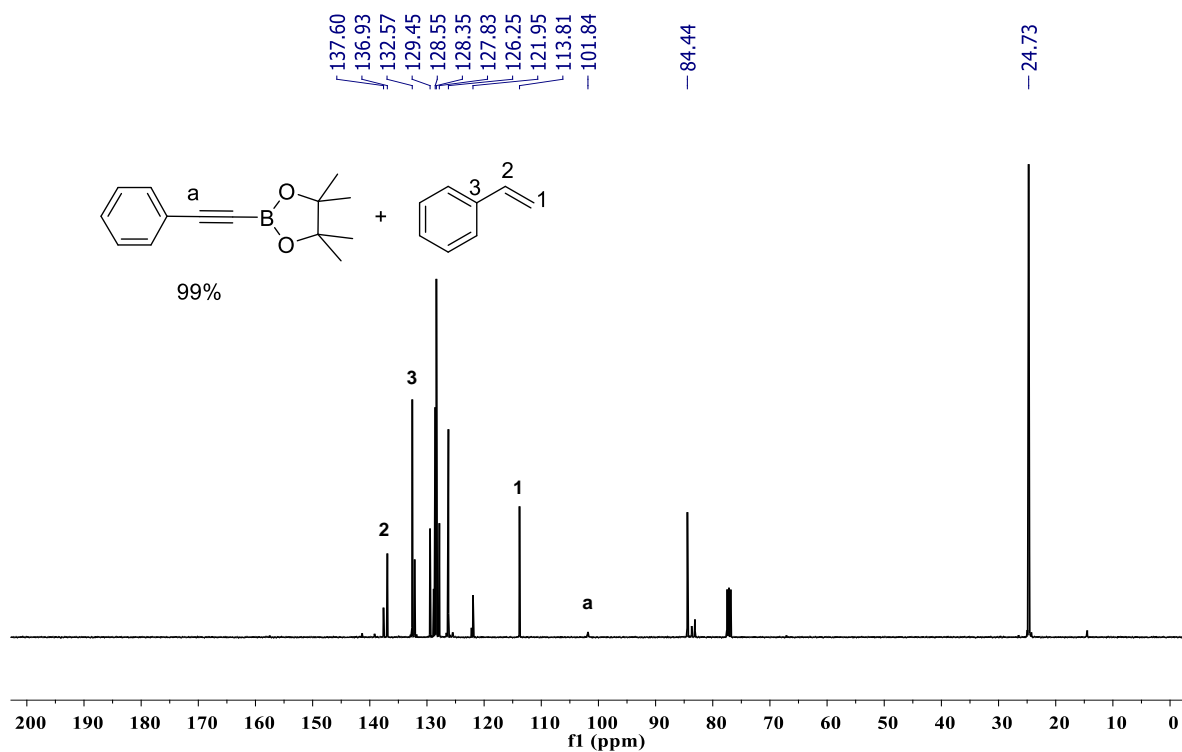

**Figure S149:**  $^{13}\text{C}\{^1\text{H}\}$  NMR spectrum of compound **2a** and unreacted styrene (100 MHz,  $\text{CDCl}_3$ ).

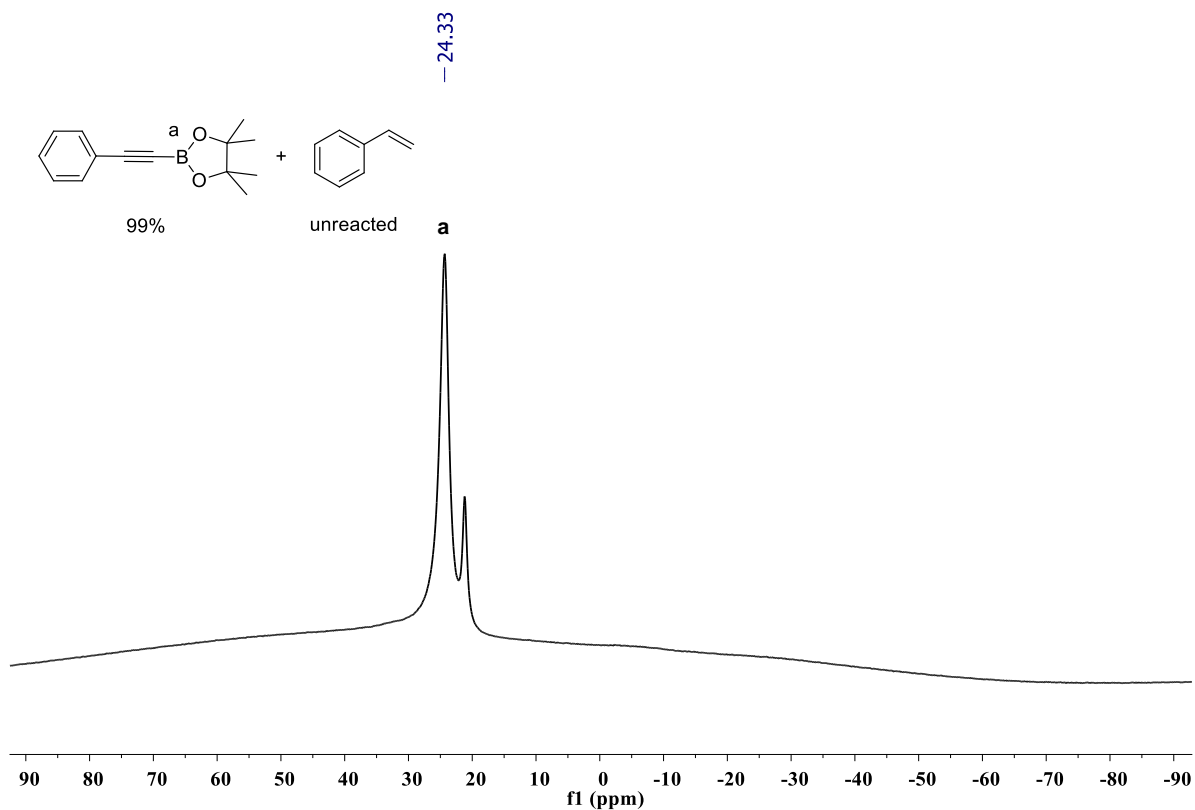

**Figure S150:**  $^{11}\text{B}$  NMR spectrum of compound **2a** and unreacted styrene (128 MHz,  $\text{CDCl}_3$ ).

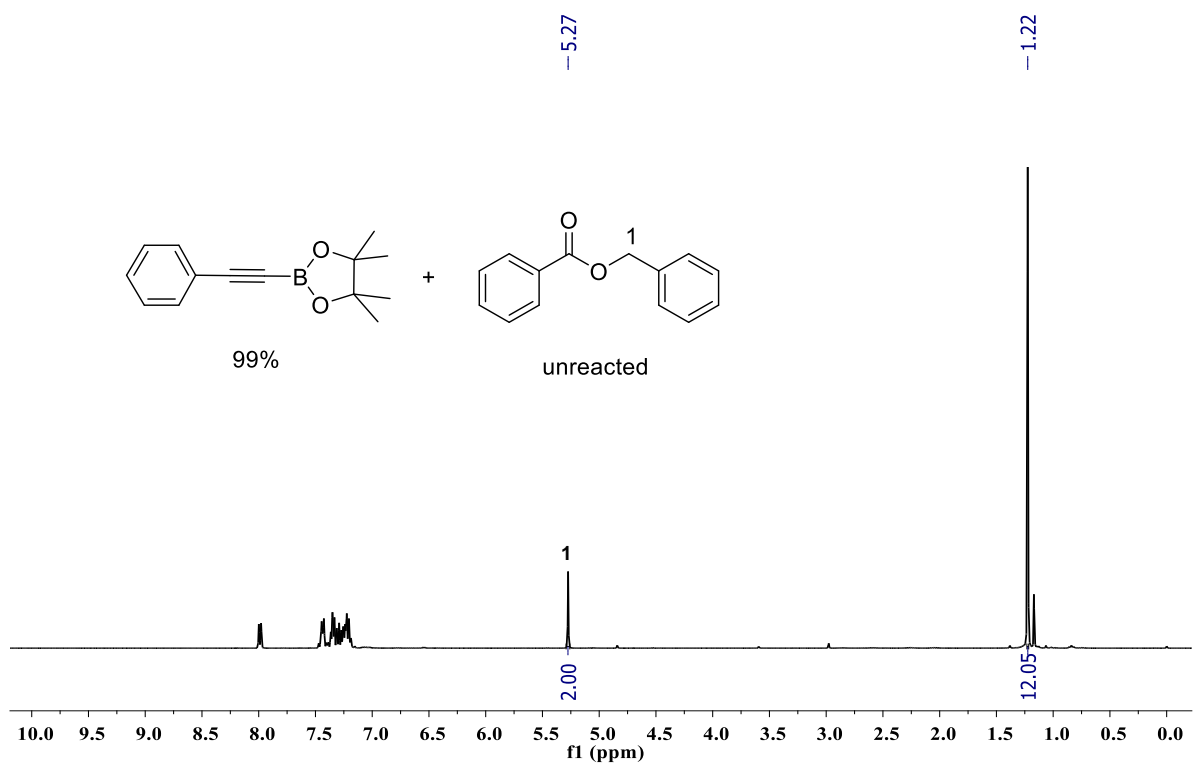

**Figure S151:**  $^1\text{H}$  NMR spectrum of compound **2a** and unreacted benzyl benzoate (400 MHz,  $\text{CDCl}_3$ ).

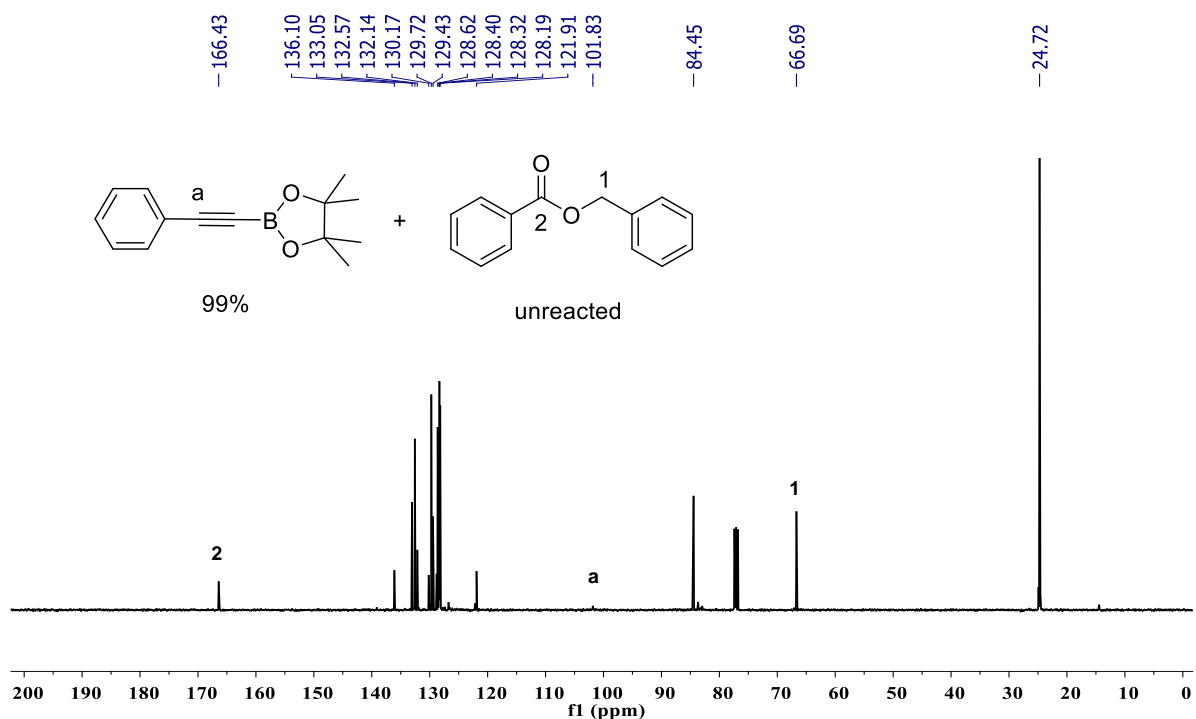

**Figure S152:**  $^{13}\text{C}\{^1\text{H}\}$  NMR spectrum of compound **2a** and unreacted benzyl benzoate (100 MHz,  $\text{CDCl}_3$ ).

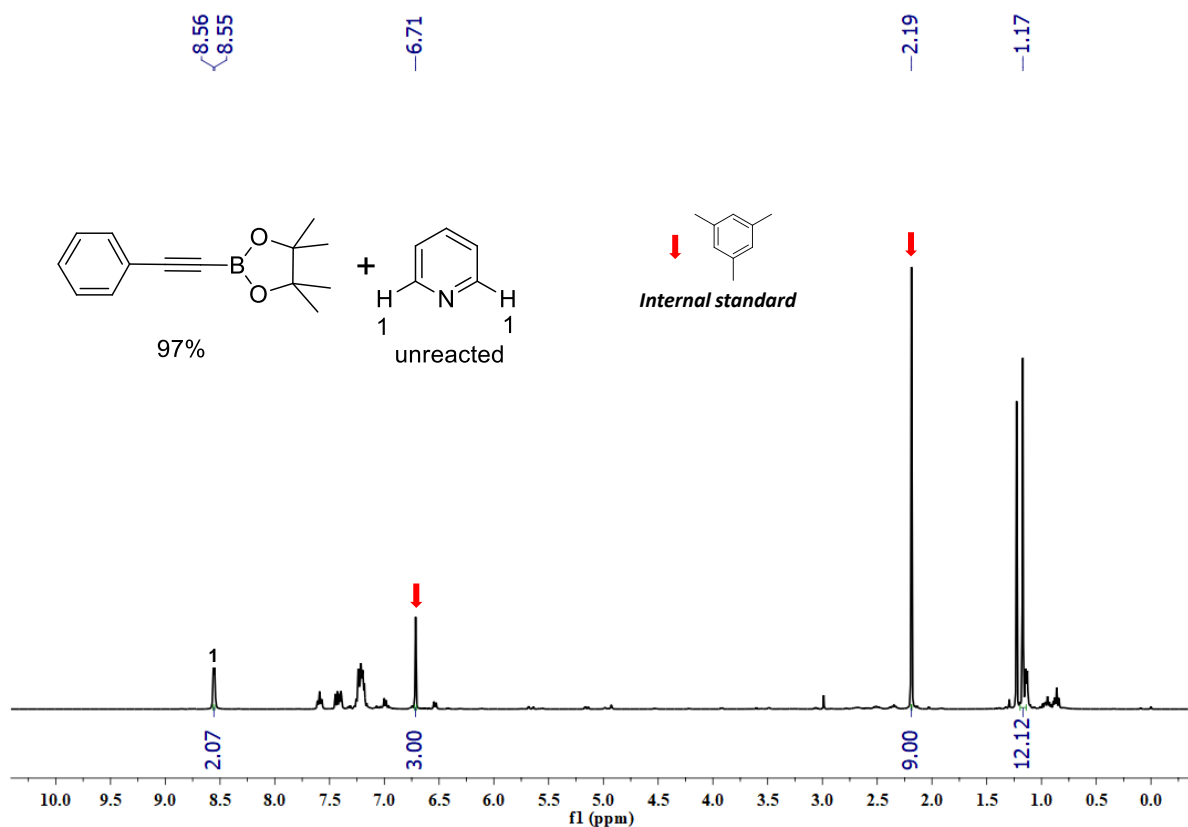

**Figure S153:**  $^1\text{H}$  NMR spectrum of compound **2a** and unreacted pyridine (400 MHz,  $\text{CDCl}_3$ ).

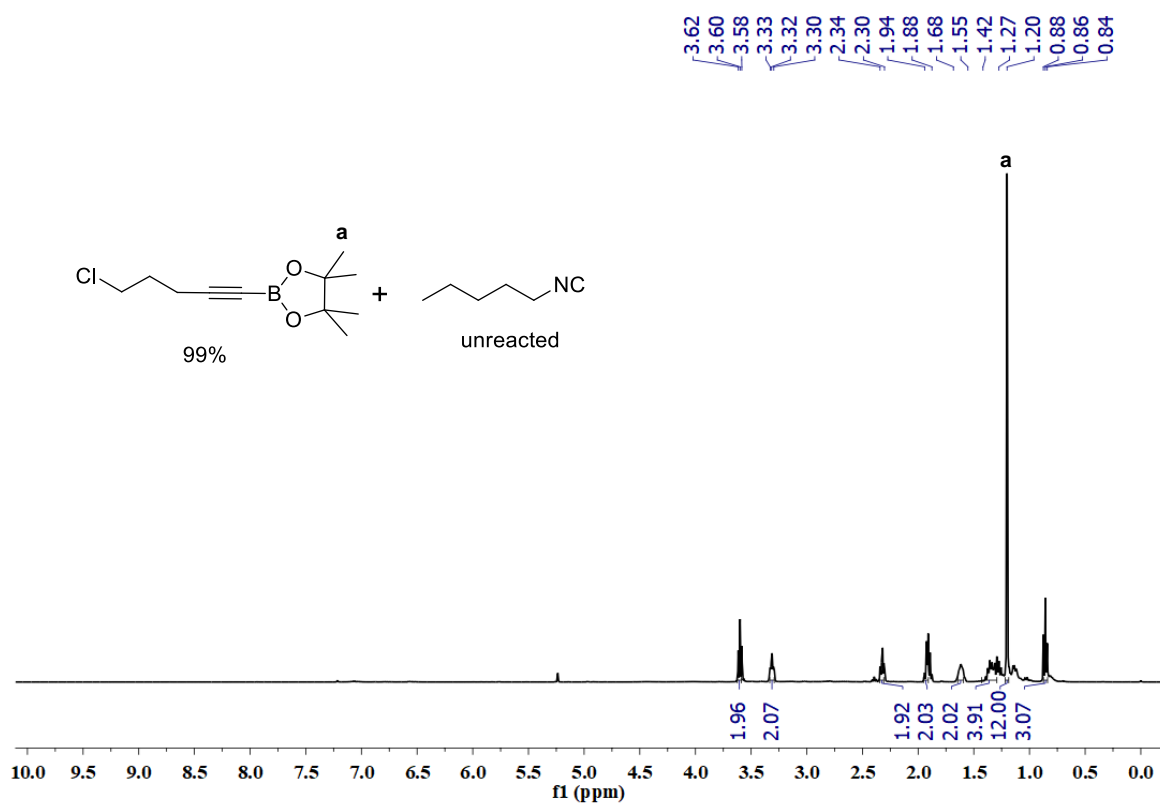

**Figure S154:** <sup>1</sup>H NMR spectrum of compound **2x** and unreacted 1-pentyl isocyanide (400 MHz, CDCl<sub>3</sub>).

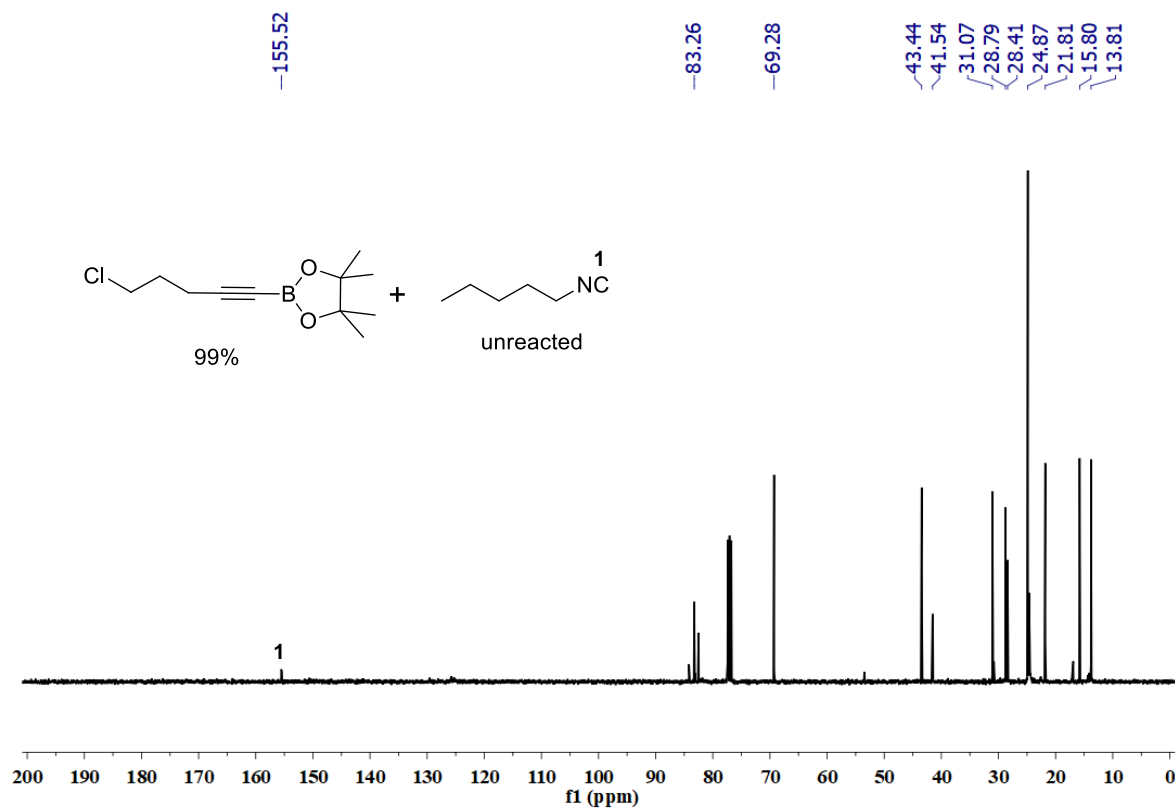

**Figure S155:** <sup>13</sup>C{<sup>1</sup>H} NMR spectrum of compound **2x** and unreacted 1-pentyl isocyanide (100 MHz, CDCl<sub>3</sub>).



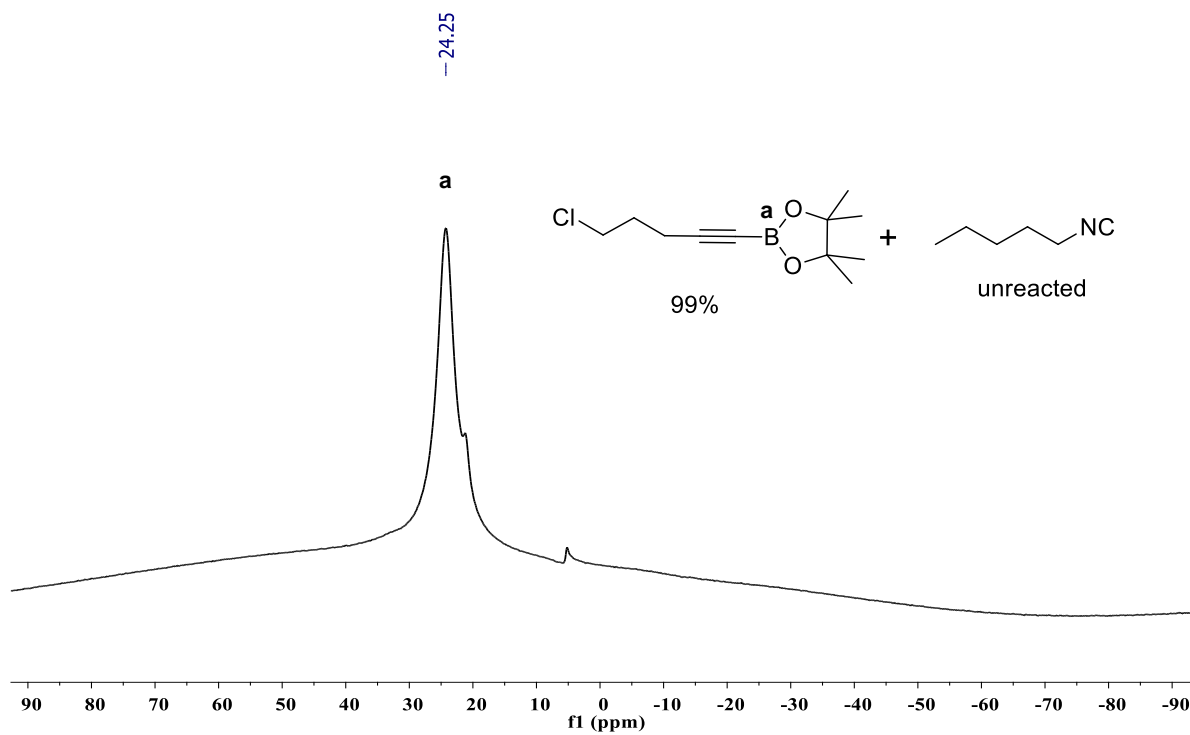

**Figure S156:**  $^{11}\text{B}$  NMR spectrum of compound **2x** and unreacted 1-pentyl isocyanide (128 MHz,  $\text{CDCl}_3$ ).

## X-ray Crystallographic Data of **II** and **IV**

### X-ray Crystallography

The single crystals of compounds **II** and **IV** were crystallized from Benzene at rt as colorless blocks after 2 d. The crystal data of compounds **II** and **IV** were collected on a Rigaku Oxford diffractometer with graphite-monochromated Cu-K $\alpha$  radiation ( $\lambda = 1.54184 \text{ \AA}$ ) and Mo-K $\alpha$  radiation ( $\lambda = 0.71073 \text{ \AA}$ ) respectively at 100 K. Selected data collection parameters, and other crystallographic results are summarized in Table S2. The structure was determined using direct methods employed in *ShelXT*,<sup>1</sup> *OleX*,<sup>2</sup> and refinement was carried out using least-square minimization implemented in *ShelXL*.<sup>3</sup> All non-hydrogen atoms were refined with anisotropic displacement parameters. Hydrogen atom positions were fixed geometrically in idealized positions and were refined using a riding model.

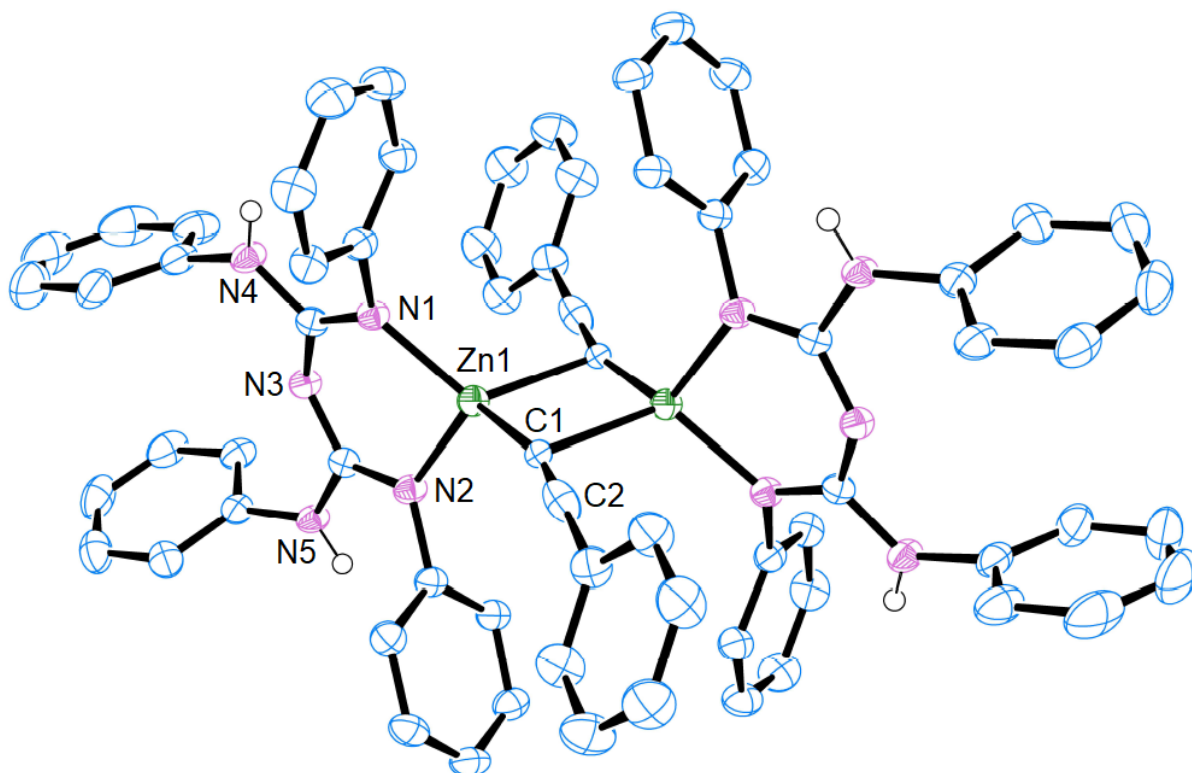

**Figure 157.** Molecular structure of **II**. The thermal ellipsoids are shown at 50% probability, and all the hydrogen atoms (except for H(4), H(5)) and ethyl groups have been removed for clarity. Selected bond lengths (Å) and angles (deg), For **II**: Zn1-N1 1.9612(17), Zn1-N2 1.9539(16), Zn1-C1 2.026(2), Zn1-C1' 2.316(2), Zn1-Zn1' 2.8705(5), C1-C2 1.167(3); N1-Zn1-N2 94.82(7), N1-Zn1-C1 115.44(7), N2-Zn1-C1 124.65(8), C1-Zn1-C1' 97.52(8), Zn1-C1-Zn1' 82.48(8).

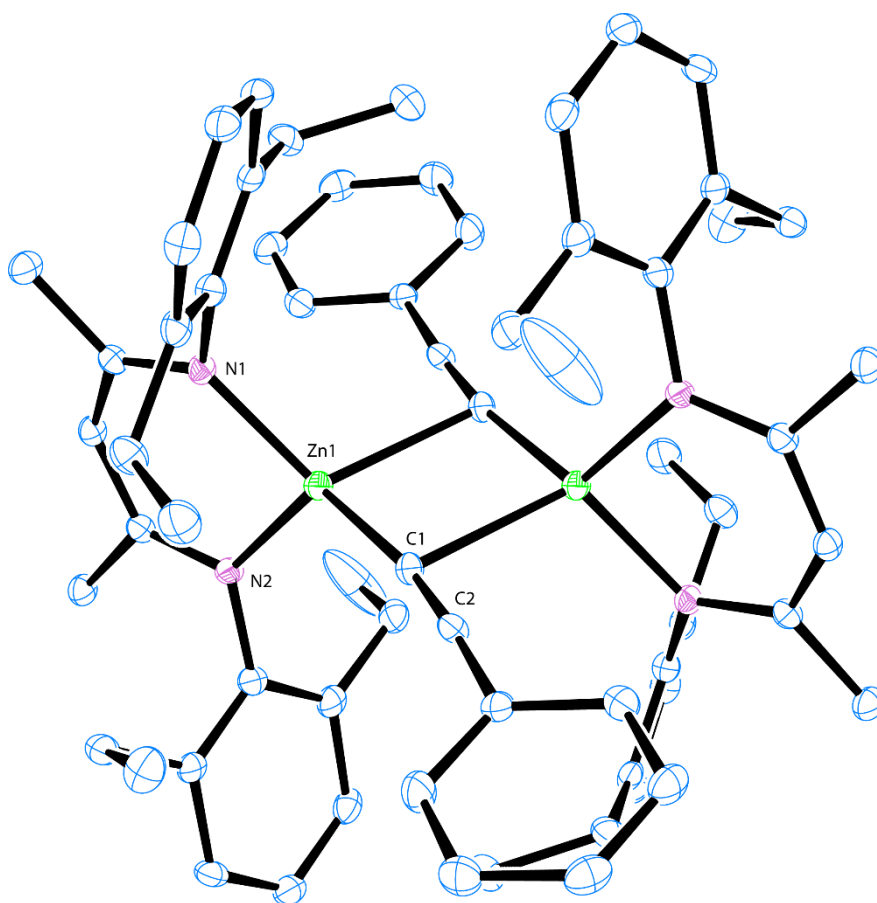

**Figure 158.** Molecular structure of **IV**. The thermal ellipsoids are shown at 50% probability, and all the hydrogen atoms have been removed for clarity. Selected bond lengths (Å) and angles (deg), For **II**: Zn1-N1 1.984(4), Zn1-N2 1.988(4), Zn1-C1 1.979(5), C1-C2 1.213(7); N1-Zn1-N2 97.20(16), N1-Zn1-C1 119.02(19), N2-Zn1-C1 123.33(18).

**Table S2.** Crystallographic Data and Refinement Parameters for Compounds **II** and **IV**.

| Compound                                           | <b>II</b>                                                                                            | <b>IV</b>                                                      |
|----------------------------------------------------|------------------------------------------------------------------------------------------------------|----------------------------------------------------------------|
| Empirical Formula                                  | C <sub>100</sub> H <sub>118</sub> N <sub>10</sub> Zn <sub>2</sub> 2 (C <sub>6</sub> H <sub>6</sub> ) | C <sub>66</sub> H <sub>76</sub> N <sub>4</sub> Zn <sub>2</sub> |
| CCDC                                               | 2177018                                                                                              | 2177019                                                        |
| Molecular mass                                     | 1746.99                                                                                              | 1056.16                                                        |
| Temperature (K)                                    | 100                                                                                                  | 100                                                            |
| Wavelength (Å)                                     | 1.54184                                                                                              | 0.71073                                                        |
| Size(mm)                                           | 0.2×0.18×0.17                                                                                        | 0.2×0.18×0.17                                                  |
| Crystal system                                     | triclinic                                                                                            | monoclinic                                                     |
| Space group                                        | P -1                                                                                                 | P2 <sub>1</sub> /c                                             |
| a (Å)                                              | 12.0811(3)                                                                                           | 17.8516(6)                                                     |
| b (Å)                                              | 13.0427(3)                                                                                           | 18.4478(7)                                                     |
| c (Å)                                              | 16.7425(4)                                                                                           | 16.8605(5)                                                     |
| α (deg) <sup>o</sup>                               | 83.465(2)                                                                                            | 90                                                             |
| β (deg) <sup>o</sup>                               | 86.107(2)                                                                                            | 94.032(3)                                                      |
| γ (deg) <sup>o</sup>                               | 63.721(2)                                                                                            | 90                                                             |
| Volume (Å <sup>3</sup> )                           | 2349.64(10)                                                                                          | 5538.8(3)                                                      |
| Z                                                  | 1                                                                                                    | 4                                                              |
| Calculated density (g/cm <sup>3</sup> )            | 1.235                                                                                                | 1.2664                                                         |
| Absorption coefficient (mm <sup>-1</sup> )         | 1.041                                                                                                | 0.911                                                          |
| F(000)                                             | 932.0                                                                                                | 2243.1                                                         |
| Theta range for data collection (deg) <sup>o</sup> | 7.592 to 136.478                                                                                     | 6.8 to 50.7                                                    |
| Limiting indices                                   | -14 ≤ h ≤ 14, -15 ≤ k ≤ 15, -20 ≤ l ≤ 19                                                             | -25 ≤ h ≤ 23, -25 ≤ k ≤ 23, -23 ≤ l ≤ 23                       |
| Reflections collected                              | 34507                                                                                                | 47199                                                          |
| Independent reflections                            | 8567 [R <sub>int</sub> = 0.0358, R <sub>sigma</sub> = 0.0252]                                        | 10002 [R <sub>int</sub> = 0.0776, R <sub>sigma</sub> = 0.0828] |
| Completeness to theta                              | 99 %                                                                                                 | 99 %                                                           |
| Absorption correction                              | Empirical                                                                                            | Empirical                                                      |
| Data/restraints/parameters                         | 8567 / 7 / 567                                                                                       | 10002 / 0 / 661                                                |
| Goodness – of–fit on F <sup>2</sup>                | 1.016                                                                                                | 1.161                                                          |
| Final R indices [I>2 sigma(I)]                     | R <sub>1</sub> = 0.0452, wR <sub>2</sub> = 0.1218                                                    | R <sub>1</sub> = 0.0600, wR <sub>2</sub> = 0.1655              |

## REFERENCES

- (1) Sheldrick, G. Crystal structure refinement with SHELXL. *Acta Crystallogr. C.* **2015**, *71*, 3–8.
- (2) Dolomanov, O. V.; Bourhis, L. J.; Gildea, R. J.; Howard, J. A. K.; Puschmann, H. OLEX<sub>2</sub>: a complete structure solution, refinement, and analysis program. *J. Appl. Crystallogr.* **2009**, *42*, 339-341.
- (3) (a) Sheldrick, G. M. A short history of SHELX. *Acta Crystallogr., Sect. A: Found. Crystallogr.* **2008**, *64*, 112-122. (b) Sheldrick, G. M. SHELXT - Integrated space-group and crystal-structure determination. *Acta Crystallogr., Sect. A: Found. Adv.* **2015**, *71*, 3-8.
